# Supplementary material for: Synthesis and characterization of a novel phosphatidylinositol 5-phosphate (PI(5)P) photoaffinity probe
Source: Royal Society of Chemistry journal article supplement (doi:10.1039/d6cb00148c), 2026-06-01
Supplement: d6cb00148c1.pdf [file d6cb00148c1.pdf]

# Synthesis and characterization of a novel phosphatidylinositol 5-phosphate (PI(5)P) photoaffinity probe

## *Supplementary Information*

*Glen Brodie,<sup>1,2</sup> Ahmed Sayed,<sup>3,4</sup> Sarah Kreuz,<sup>3</sup> Wolfgang Fischle,<sup>3</sup> Stuart J. Conway.<sup>1,2,\*</sup>*

Author affiliations.

<sup>1</sup>Department of Chemistry, Chemistry Research Laboratory, University of Oxford, Mansfield Road, Oxford OX1 3TA, U.K.

<sup>2</sup>Department of Chemistry & Biochemistry, University of California Los Angeles, 607 Charles E. Young Drive East, Los Angeles, California 90095, U.S.A.

<sup>3</sup>Bioscience Program, Biological and Environmental Science and Engineering Division, King Abdullah University of Science and Technology (KAUST), Thuwal 23955, Kingdom of Saudi Arabia

<sup>4</sup>Chemistry Department, Faculty of Science, Assiut University, Assiut 71516, Egypt

To whom correspondence should be addressed: [stuartconway@ucla.edu](mailto:stuartconway@ucla.edu)

# TABLE OF CONTENTS

|                                                       |                   |
|-------------------------------------------------------|-------------------|
| <b><u>SUPPLEMENTARY FIGURES AND SCHEMES .....</u></b> | <b><u>3</u></b>   |
| <b><u>BIOLOGY AND BIOLOGICAL METHODS .....</u></b>    | <b><u>8</u></b>   |
| <b><u>SYNTHESIS AND CHARACTERIZATION.....</u></b>     | <b><u>13</u></b>  |
| <b><u>NMR SPECTRA AND OTHER DATA .....</u></b>        | <b><u>48</u></b>  |
| <b><u>REFERENCES .....</u></b>                        | <b><u>155</u></b> |

# Supplementary Figures and Schemes

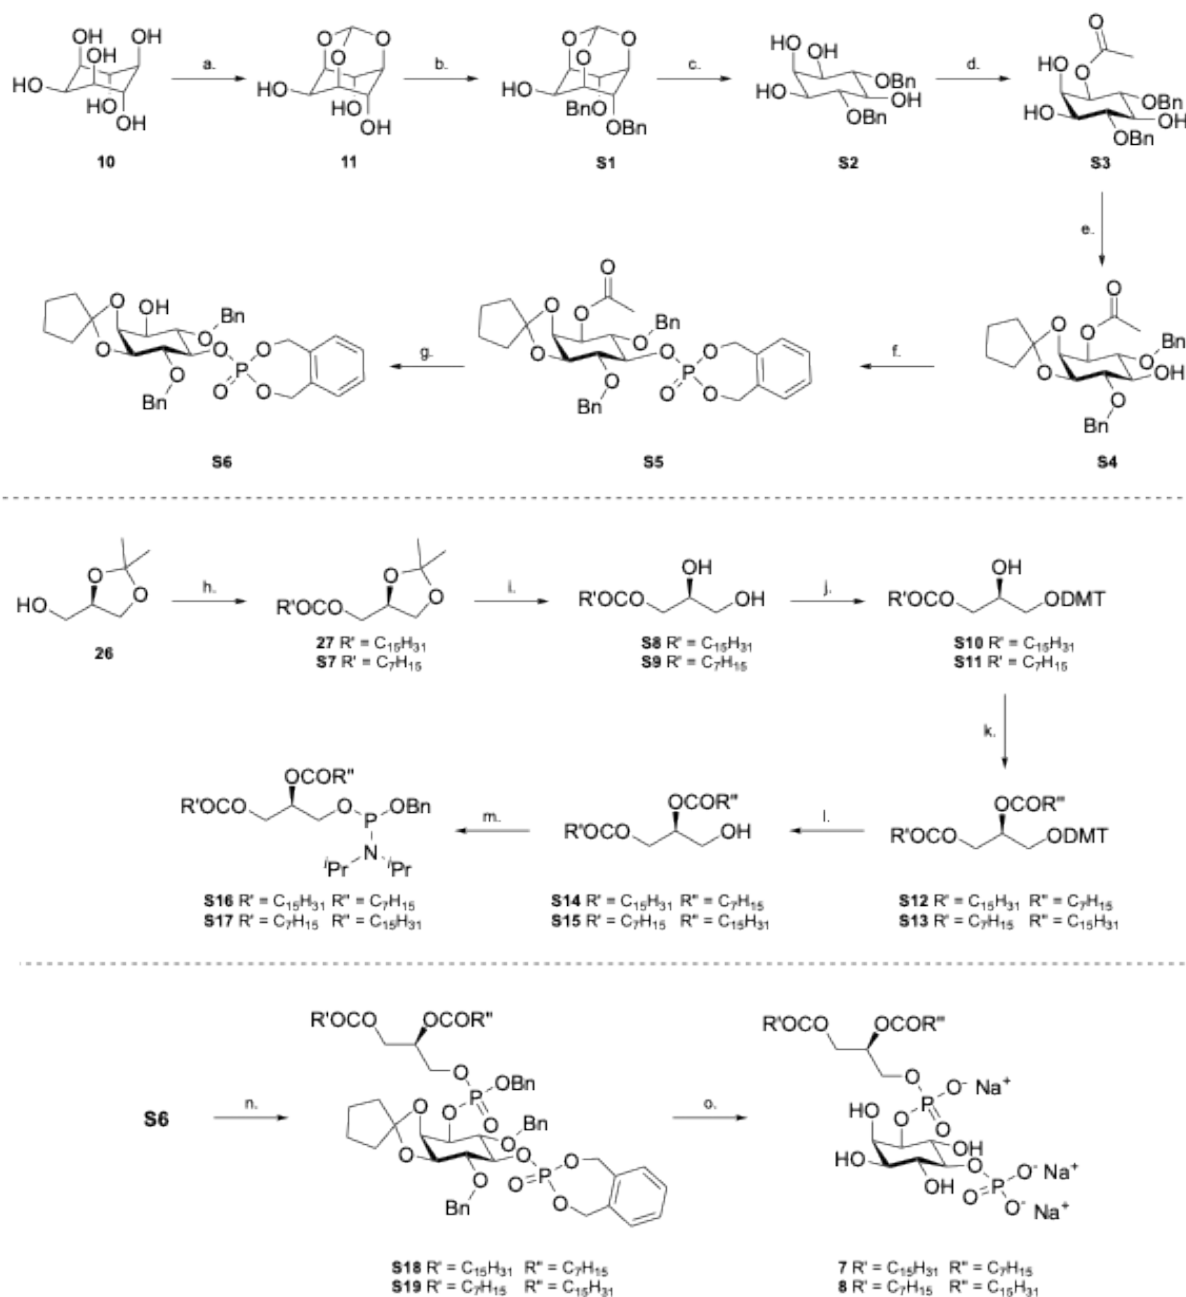

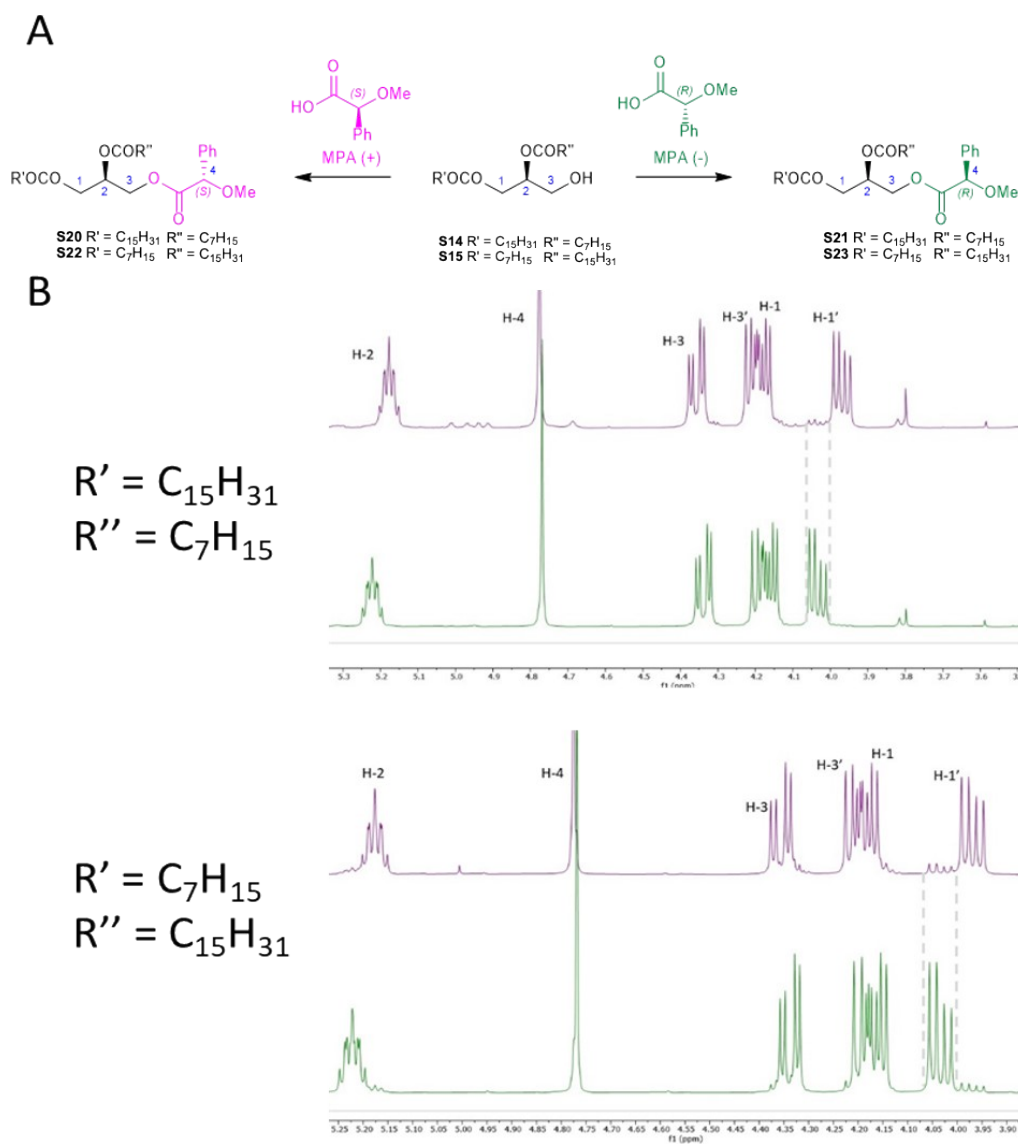

**Figure S1:** Determination of the e.e. values of diglycerides **S14** and **S15**. **A** Derivatization of diglycerides. *Reagents and conditions:* i. (+)-MPA or (-)-MPA, DCC, 4-DMAP,  $\text{CH}_2\text{Cl}_2$ , RT, 6–18 h, 75–83% of **S20**, **S21**, **S22**, or **S23**. **B**  $^1\text{H}$  NMR spectra of diastereoisomers revealing the e.e. of **S14** to be ~94% and **S15** to be ~90% using a method described by Seco *et al.*<sup>1</sup> DCC = *N,N'*-dicyclohexylcarbodiimide; 4-DMAP = 4-dimethylaminopyridine; MPA = methoxyphenylacetic acid.

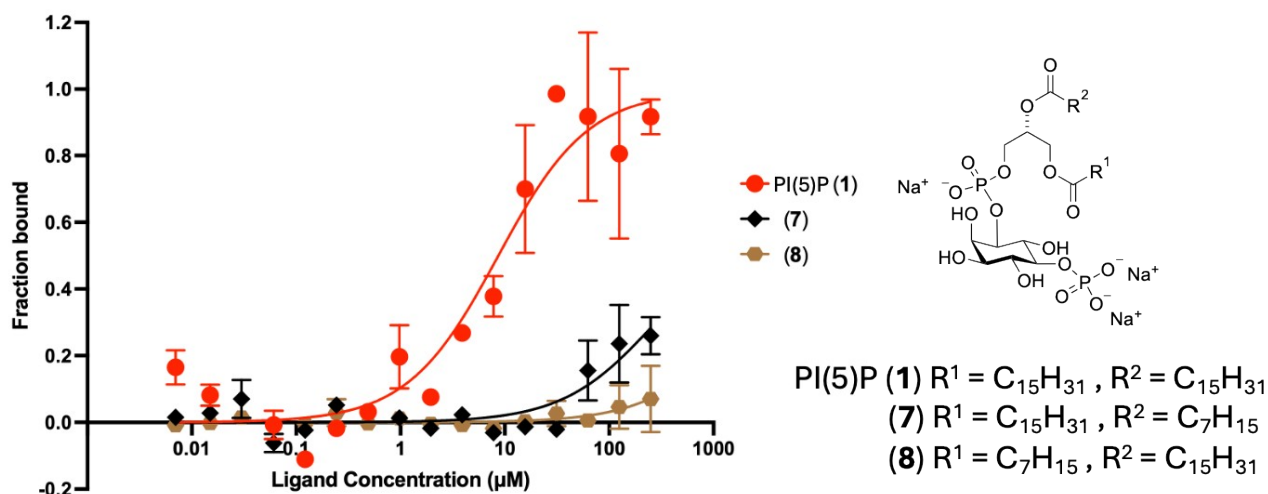

**Figure S2:** The binding of PI(5)P (1) and PI(5)P-analogues (7) and (8) to recombinant hUHRF1 (200 nM) was analyzed using MST. Fraction bound was plotted as an average of three independent measurements. Error bars correspond to the Std Dev. The  $K_d$  values of (7) and (8) could not be determined due to the titration curve not reaching saturation, however, a binding interaction was observed at higher concentrations.

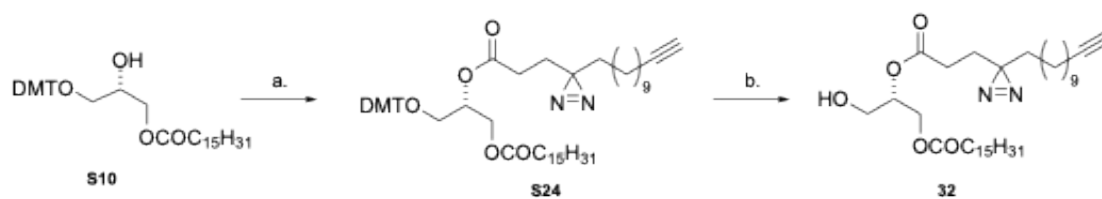

**Scheme S2:** Alternative reaction conditions for synthesis of alcohol **32**. *Reagents and conditions:* a. Diazirine **27**, DCC, 4-DMAP,  $CH_2Cl_2$ , RT, 18 h, 41% of (+)-**S24**; b. AcOH acid:H<sub>2</sub>O (4:1), 50 °C, 2.5 h, 68% of (-)-**32**. Ac = acetyl; DCC = *N,N'*-dicyclohexylcarbodiimide; 4-DMAP = 4-dimethylaminopyridine.

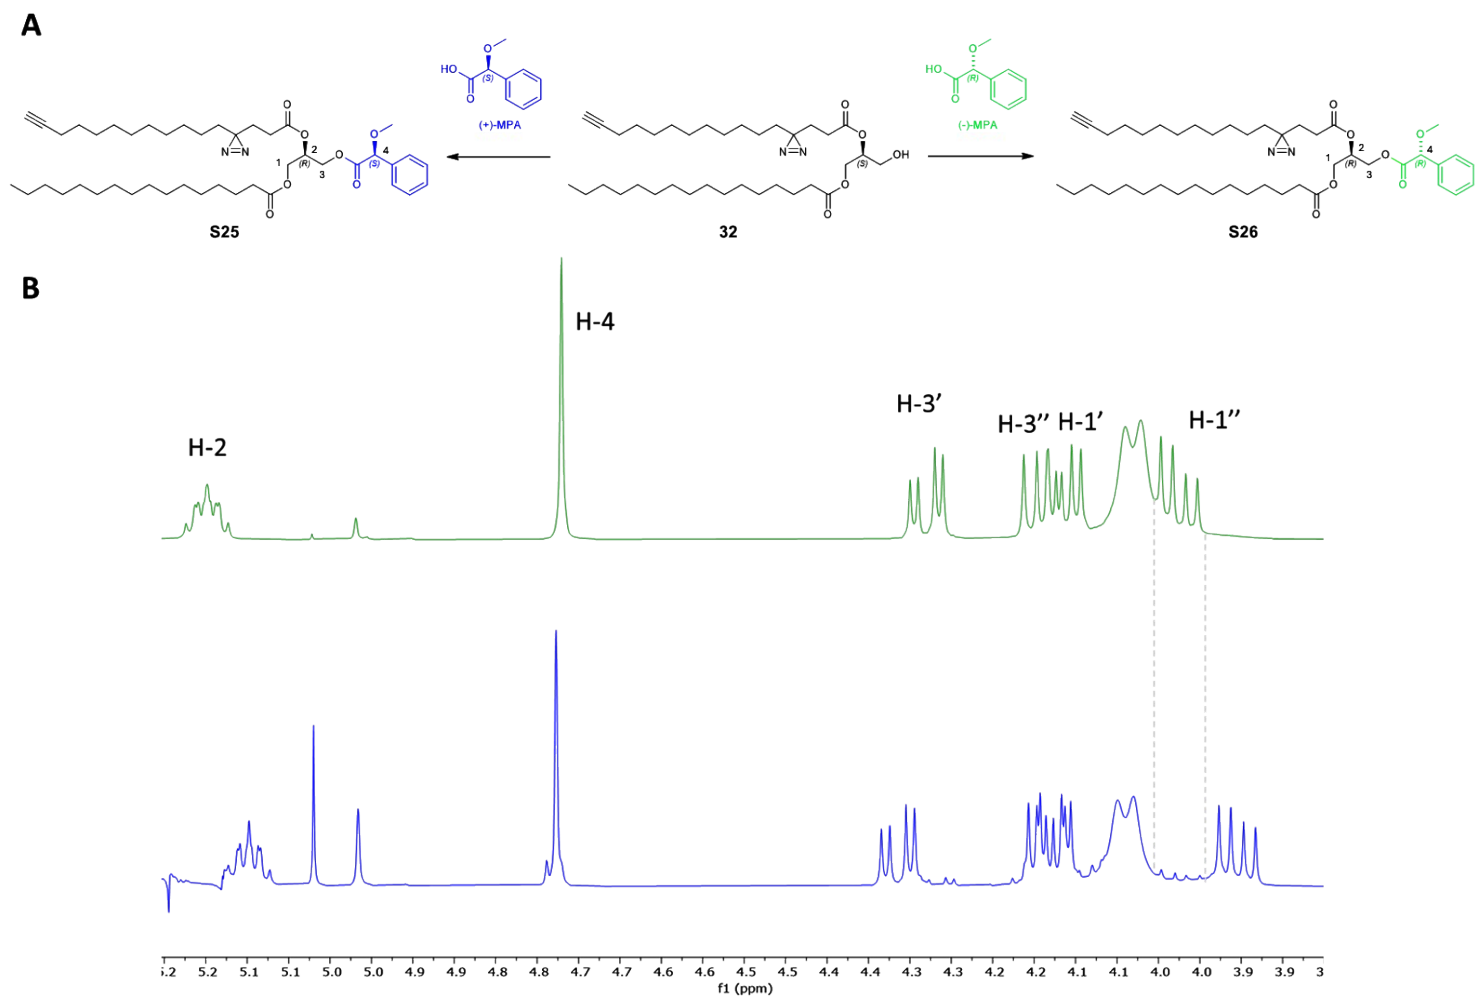

**Figure S3:** Determination of the e.e. value of diglyceride **32**. (A) Derivatization of diglyceride **32** with MPA. *Reagents and conditions:* (+)-MPA or (–)-MPA, DCC, 4-DMAP, CH<sub>2</sub>Cl<sub>2</sub>, RT, 6–18 h, 65–82% of **S25** or **S26**. (B) <sup>1</sup>H NMR spectra of each diastereoisomer revealing the e.e. of **32** to be >95% using a method described by Seco *et al.*<sup>1</sup>. DCC = *N,N'*-dicyclohexylcarbodiimide; 4-DMAP = 4-dimethylaminopyridine; MPA = methoxyphenylacetic acid

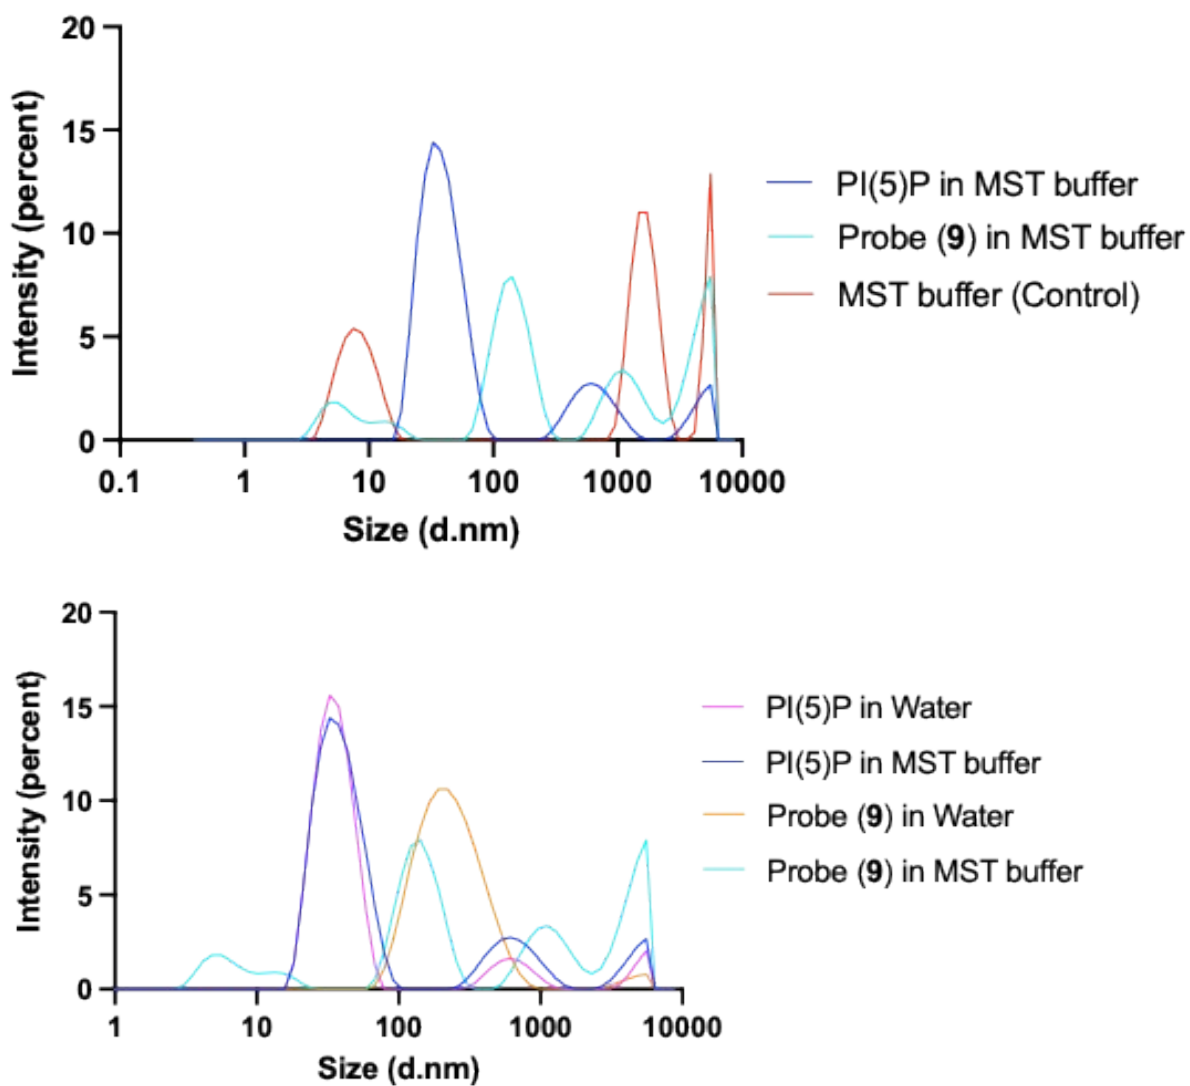

**Figure S4:** Dynamic light scattering (DLS) data on the distribution of the relative intensity of scattered light by particle size (Stokes diameter) for PI(5)P and probe (9) at a concentration of 50  $\mu\text{M}$  in either deionized water or in MST buffer containing 0.05% Tween-20 at 25  $^{\circ}\text{C}$ . MST buffer alone was measured as a control. Unmodified PI(5)P exhibited comparable size distributions under both buffer conditions, with mean hydrodynamic diameters of  $37 \pm 1.1$  nm in water and  $48 \pm 3.0$  nm in MST buffer. In contrast, the diazirine-modified PI(5)P probe (9) formed considerably larger assemblies overall, measuring  $270 \pm 18$  nm in water and  $153 \pm 35$  nm in MST buffer.

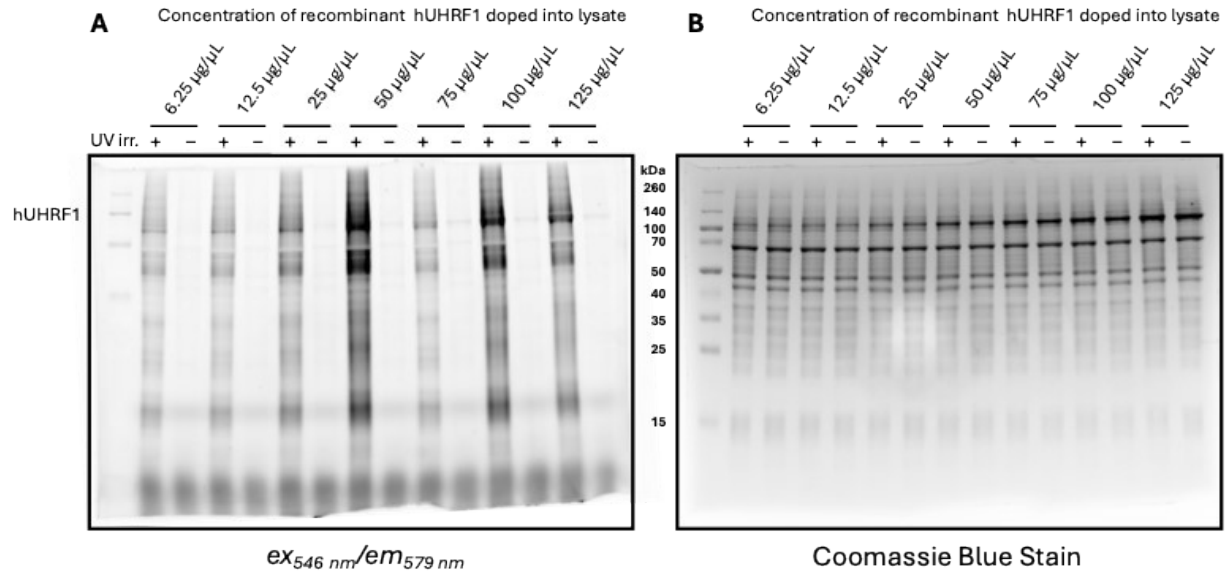

**Figure S5:** SDS-PAGE analysis of total cells lysate prepared from Expi293 cells containing the indicated amounts of doped bacterially expressed recombinant hUHRF1-FLAG after UV-crosslinking of PI(5)P-diazirine (**9**) and labelling with TAMRA-PEG-azide using click chemistry. The gel was analyzed for fluorescence of the TAMRA dye using excitation with light at 546 nm wavelength (**A**) and following Coomassie staining (**B**). UV irr. refers to the lysate/sample being exposed to 365 nm UV light for 30 min, which is necessary for photo-crosslinking of PI(5)P-diazirine (**9**) to bound proteins. The molecular weight markers are indicated. The gel shows that with increased doped hUHRF1, an increase in signal is detected under UV, confirming that the photo-crosslinking and click reaction with diazirine probe (**9**) to hUHRF1 is detected.

# Molecular Biology and Biochemistry

## Expression and purification of recombinant proteins

C-terminally His6-tagged hUHRF1 was expressed from a pETM-13 plasmid in BL21-DE3 RIL *E. coli* cells cultured in 2xYT medium supplemented with kanamycin (50 µg/mL) and chloramphenicol (34 µg/mL). The culture was grown at 30 °C with shaking at 180 rpm until the culture reached an OD<sub>600</sub> of 0.5–0.6, after which, protein expression was induced by the addition of IPTG (0.75 mM aqueous), followed by incubation for 3 hours at 25 °C while shaking. C-terminal His6-tagged hTAF3 was expressed from a pET-29b(+) plasmid in a manner similar to hUHRF1 but in the presence of ZnSO<sub>4</sub> (50 µM aqueous), with induction at an OD<sub>600</sub> of 0.6 using IPTG (300 mM aqueous), followed by incubation overnight at 20 °C.

Bacterial cells were harvested by centrifugation at 7,808 × g for 20 minutes at 4 °C, resuspended in Ni-NTA binding buffer (50 mM Tris-HCl, pH 8.0; 300 mM NaCl; 20 mM imidazole) and lysed using an Avestin Emulsiflex-C5 homogenizer at 4 °C. The lysate was cleared by centrifugation at 30,624 × g for 30 minutes at 4 °C. The resulting supernatant containing either hUHRF1 or hTAF3, was incubated with pre-equilibrated Ni-NTA resin in binding buffer for 1 hour at 4 °C. The resin was subsequently washed three times with washing buffer (50 mM Tris-HCl, pH 8.0; 500 mM NaCl; 30 mM imidazole). Proteins were eluted in elution buffer (50 mM Tris-HCl, pH 8.0; 150 mM NaCl; 500 mM imidazole) and dialyzed overnight at 4 °C against storage buffer [50 mM Tris-HCl, pH 8.0; 150 mM NaCl; 10% (v/v) glycerol, and 1 mM DTT]. Proteins were concentrated using Amicon Ultra centrifugal filter units (Millipore, Billerica, USA) with a 30 kDa cutoff for hUHRF1 and a 10 kDa cutoff for hTAF3, and further purified by size exclusion chromatography using a Superose™ 6 increase 10/300 GL column.

### **Mammalian expression of hUHRF1**

Expi293F™ cells (Thermo Fisher Scientific, Cat. No. A14527) were cultured in Expi293™ Expression Medium (Thermo Fisher Scientific, Cat. No. A1435101) under controlled conditions at 37 °C with 8% CO<sub>2</sub> in a humidified incubator. hUHRF1-FLAG was expressed from a pcDNA3.1+ plasmid, containing a CMV promoter. Cells were transfected using the polyethylenimine reagent (Polyscience, Cat No. 23966-1), following the manufacturer's protocol. Post-transfection, the cells were cultured for 18 to 72 hours to achieve optimal protein expression. Subsequently, cells were harvested by centrifugation at 300 × g for 10 minutes at 4°C. The resulting cell pellet was resuspended in lysis buffer (50 mM Tris-HCl, pH 8.0, 150 mM NaCl) supplemented with cOmplete™ EDTA-free Protease Inhibitor Cocktail. Cells were lysed by sonication, and the lysate was clarified by centrifugation at 12,000 × g for 15 minutes at 4 °C.

### **Western blot analysis**

Cell lysates (5 mg/ml) were heated for 5 minutes at 95 °C in SDS loading buffer and resolved on 12% acrylamide gels. Proteins were then transferred to nitrocellulose or PVDF membranes, which were subsequently blocked in Tris Buffered Saline with Tween 20 (TBST) containing 5% (w/v) dry milk powder. Anti-hUHRF1 antibodies (sc-373750, Santa Cruz Biotechnology, 1:1000 dilution) and Anti-FLAG antibody (Monoclonal anti-FLAG® BioM2 antibody produced in mouse, Sigma-Aldrich (F1804)) were applied in blocking buffer and incubated overnight. Afterwards, the membranes were washed three times for 10 minutes each with TBST and then incubated with secondary antibodies labeled with HRP in blocking buffer for 1 hour at room temperature. Following another three 10-minute washes with TBST, the membranes were treated with ECL substrate for 2 minutes before visualization.

### **Microscale thermophoresis**

C-terminal His6-tagged hUHRF1 was labelled using the Monolith His-tag labelling kit RED-tris-NTA (Nanotemper #MO-L008) as per the manufacturer's instructions. In summary, MST buffer (20 mM Hepes-NaOH (pH 7.9), 150 mM NaCl, 0.05% (v/v) Tween 20) was prepared. 400 nM of the protein was then incubated with 100 nM of the His-tag labelling dye for 30 minutes at room temperature. Subsequently, the labelled proteins were centrifuged and collected at 15,000 × g for 10 minutes at 4 °C to remove any precipitate. The fluorescently labelled protein was then incubated with a range concentrations of PI(5)P and the diazirine-modified PI(5)P compounds at room temperature for 15 minutes prior to measurement on a Monolith NT.115 instrument (NanoTemper, 80% LED power, 40% MST power).<sup>2</sup> The data points were fitted using MO.Affinity Analysis v2.3 analysis software, and the dissociation constants were then determined using a single-site model to fit the curve.

### **Particle Size Measurements**

Particle size distribution and mean hydrodynamic diameter were determined using a Malvern Zetasizer Nano ZS (Malvern Instruments, St. Laurent, QC, Canada). Measurements were performed in triplicate using various concentrations of unmodified PI(5)P or the diazirine probe **9**. Dynamic light scattering (DLS) measurements were performed in deionized water and in MST buffer containing 0.05% (v/v) Tween-20.

### **PI(5)P-diazirine probe crosslinking with hUHRF1 and cell lysate and CuAAC Click reaction**

PI(5)P-diazirine probe (50 µM) in DMSO (final conc. 0.5%) was incubated with 0.5 mg/mL hUHRF1 and 2 mg/mL Expi293 cell lysate for 30 min at 4 °C (20 µL reaction volume) in reaction buffer (50 mM Tris-HCl pH 8.0, 150 mM NaCl, 10% glycerol, and 1 mM DTT). The solutions were

irradiated with UV light (365 nm) for 15 min at 4 °C using a UVP Blak-Ray™ B-100A UV Lamp. Meanwhile, the negative control samples were incubated in the dark at 4°C.

The components of the click reaction were prepared as follows: Azide Fluor 545 (100 µM final concentration from a 10 mM DMSO stock solution), CuSO<sub>4</sub> (1 mM final concentration from a 50 mM aqueous stock solution), TCEP-HCl (1 mM final concentration from a 50 mM aqueous stock solution), and TBTA (100 µM final concentration from a 10 mM DMSO stock solution). Subsequently, the click reaction was carried out by the addition of a click mixture with the following volume ratio 1:2:2:1 of Azide Fluor 545: CuSO<sub>4</sub>: TCEP: TBTA to the cross-linked samples, and incubated with shaking at 700 rpm for 1 h, in the dark, at room temperature. Then, 4× Laemmli sample buffer premixed with DDT was added to 20 µl of reaction mixture and heated for 5 min at 95 °C. 10 µl was loaded onto 8% SDS-PAGE and gel electrophoresis was performed to separate the proteins. The bottom of the gel was cut to avoid the residual excess of Azide Fluor 545 which could reduce the fluorescence signal of the crosslinked protein. Then, in-gel fluorescence was acquired at 546 nm using a Bio-Rad imager. The gel was further subjected to Coomassie staining followed by a destaining step. The Bio-Rad imager was used to image the Coomassie-stained gel.

For the Biotin-Azide click reaction, the volumes of reagents were scaled up 5-fold while maintaining the same molar ratios as described above. Post-click reaction, 0.5 mL of ice-cold acetone (-20 °C) was added to the mixture. Samples were vortexed and incubated at -20 °C for 30 minutes. The resulting precipitate was collected by centrifugation at 20,000 × g for 10 minutes at 4 °C. The pellet was washed with ice-cold acetone to remove excess Biotin-Azide, followed by sonication in a water bath. Acetone wash and centrifugation steps were repeated twice. The protein pellet was air-dried for 10 minutes at room temperature to remove residual acetone and then resuspended in 50 µL of 1% SDS in PBS, vortexed, and sonicated. The suspension was further diluted with 0.5 mL of affinity purification buffer (50 mM Hepes-NaOH, pH 7.4; 100 mM

NaCl; 1% (v/v) IGEPAL). 50  $\mu$ L magnetic streptavidin beads (Streptavidin MagneSphere® Paramagnetic Particles, Promega) pre-equilibrated with affinity purification buffer were added to the solution, and the mixture was incubated overnight at 4 °C on a rotating mixer. The beads were recovered using a magnetic rack and washed three times with wash buffer (50 mM Hepes-NaOH, pH 7.4; 500 mM NaCl; 1% (v/v) IGEPAL). Bound proteins were eluted with 50  $\mu$ L of elution buffer (2 mM D-biotin; 1% (v/v) IGEPAL in PBS) for 30 minutes at room temperature, separated by SDS-PAGE (12% gel), transferred to a PVDF membrane, and detected using streptavidin-HRP (Pierce™ High Sensitivity Streptavidin-HRP, 1:1000).<sup>3</sup>

#### **Anti-FLAG affinity purification**

Cell lysate from 293Expi cells overexpressing hUHRF1-FLAG (100 mg total) was incubated with pre-equilibrated Pierce™ Anti-DYKDDDDK Affinity Resin for 2 hours at 4 °C in a buffer containing 50 mM Tris-HCl (pH 8.0), 150 mM NaCl, 1 mM DTT, and 10% (v/v) glycerol. The mixture was gently rotated to facilitate binding of the FLAG-tagged protein to the resin. The resin was then washed three times with the same buffer to remove unbound and non-specifically bound proteins. Elution of bound proteins was performed using 0.5 mg/mL 3 $\times$ FLAG peptide in binding buffer, with incubation overnight at 4 °C.

# Synthesis and Characterization

## Chemistry General Methods

$^1\text{H}$  NMR spectra were recorded on Bruker AVIIIHD 400 nanobay (400 MHz), Bruker NEO 600 (600 MHz) with  $^1\text{H}$  helium-cooled cryoprobe, or Bruker AVIIIHD 500 (500 MHz) spectrometer in the stated solvents as a reference for the internal deuterium lock. The chemical shift data for each signal are given as  $\delta_{\text{H}}$  in units of parts per million (ppm) relative to tetramethylsilane (TMS) where  $\delta_{\text{H}}(\text{TMS}) = 0.00$  ppm. The spectra are calibrated using the solvent peak with the data provided by Fulmer *et al.*<sup>4</sup> The multiplicity of each signal is indicated by s (singlet); br s (broad singlet); d (doublet); dd (doublet of doublets), ddd (doublet of doublet of doublets), t (triplet), q (quartet), dq (double of quartet) or m (multiplet). The number of protons (n) for a given resonance signal is indicated by nH. Where appropriate, coupling constants ( $J$ ) are quoted in Hz and are recorded to the nearest 0.1 Hz. Identical proton coupling constants ( $J$ ) are averaged in each spectrum and reported to the nearest 0.1 Hz. The coupling constants are determined by analysis using Bruker TopSpin version 4.1.3 software.  $^1\text{H}$  spectra were assigned using 2D NMR experiments including COSY, HMBC, HSQC, HMBC, and  $^1\text{H}$ - $^{31}\text{P}$  HMBC, as required.  $^{31}\text{P}$  NMR spectra were recorded on a Bruker AVIIIHD 400 nanobay (162 MHz), or Bruker NEO 600 (243 MHz) spectrometer in the stated solvents as a reference for the internal deuterium lock, using a broadband proton decoupling pulse sequence. The chemical shift for each signal is given as  $\delta_{\text{P}}$  in units of parts per million (ppm) relative to 85% phosphoric acid as an external reference where  $\delta_{\text{P}}(\text{H}_3\text{PO}_4) = 0.00$  ppm. Signals are singlets unless otherwise stated.  $^{31}\text{P}$  spectra were assigned using  $^1\text{H}$ - $^{31}\text{P}$  NMR experiments as necessary.  $^{13}\text{C}$  NMR spectra were recorded on a Bruker AVIIIHD 400 nanobay (101 MHz), Bruker NEO 600 (151 MHz) spectrometer in the stated solvents, with broadband proton decoupling and an internal deuterium lock. The chemical shift data for each signal are given as  $\delta_{\text{C}}$  in units of parts per million (ppm) relative to tetramethylsilane (TMS) where  $\delta_{\text{C}}(\text{TMS}) = 0.00$  ppm. The spectra are calibrated using the solvent peak with the data provided by Fulmer

*et al.*<sup>4</sup> The shift values of resonances are quoted to 1 decimal place unless peaks have similar chemical shifts, in which case 2 decimal places are used. Where appropriate, the multiplicity of each signal is indicated by d (doublet), t (triplet) or m (multiplet). Coupling constants (*J*) are quoted in Hz and are recorded to the nearest 0.1 Hz. These were determined using Bruker TopSpin version 4.1.

When two diastereoisomers or regioisomers are present in the sample, A and B denote each of the two diastereoisomers without distinguishing between them. A is arbitrarily assigned to the diastereoisomer with the highest ppm shift and B to the diastereoisomer with the lowest ppm shift, in <sup>1</sup>H NMR, <sup>13</sup>C NMR and <sup>31</sup>P NMR spectra.

Low resolution electrospray ionization spectra were acquired on a Waters LCT Premier spectrometer or Agilent 6120 Quadrupole spectrometer. High resolution mass spectra were recorded on either a Bruker MicroTOF spectrometer, operating in positive or negative mode, or Waters Micromass LCT from solutions of MeOH, MeCN or H<sub>2</sub>O. *m/z* values are reported in Daltons and followed by their percentage abundance in parentheses.

Specific optical rotations were measured using a Schmidt + Haensch UniPol L2000 polarimeter, in cells with a path length of 1 dm, using a sodium lamp at 589 nm. The concentration (*c*) is expressed in g/100 mL (equivalent to g/0.1 dm<sup>3</sup>) Specific rotations are denoted  $[\alpha]_D^T$  and are given in implied units of 10<sup>-1</sup>degcm<sup>2</sup>g<sup>-1</sup> at the temperature stated.

Melting points were determined using a Gallenkamp MF370 and are uncorrected. The solvents of crystallization are shown in parentheses. Infrared (IR) spectra were obtained from neat samples, either as liquids or solids using a diamond ATR module. The spectra were recorded on a Bruker Tensor 27 spectrometer. Absorption maxima are reported in wavenumbers (cm<sup>-1</sup>).

Thin layer chromatography (TLC) was carried out on normal phase Merck silica gel 60 F254 aluminum-supported chromatography sheets. Visualization was by absorption of UV light ( $\lambda_{\max}$  254 nm) or by development from an aqueous solution of potassium permanganate. Reaction progress was monitored at appropriate times either by TLC or by  $^{31}\text{P}$  NMR. Normal phase silica gel flash column chromatography was performed either manually using VWR Prolabo silica gel 60 (240–400 mesh) under a positive pressure of nitrogen or using a Biotage Selekt System with pre-packaged normal phase Biotage Sfar columns.

Chemicals were purchased from Apollo Scientific, Merck UK, Alfa Aesar UK, Fisher Scientific UK, and Fluorochem. All reagents were purified, when necessary, by standard techniques.  $\text{Et}_3\text{N}$ , DIPEA, DIPA were dried by stirring over  $\text{CaH}_2$  followed by distillation. These were stored under Ar and over 3 Å molecular sieves.  $\text{PCl}_3$  was heated under reflux to expel dissolved HCl, then distilled and stored under Ar. Anhydrous solvents were obtained under the following conditions: THF, MeCN, DMF,  $\text{Et}_2\text{O}$ , toluene, MTBE and  $\text{CH}_2\text{Cl}_2$  were dried by passing through a column of activated basic alumina, and then then further dried over 3 Å molecular sieves. Anhydrous MeOH was purchased from Sigma Aldrich UK in SureSeal™ bottles and used without further purification. All other solvents were used as supplied (analytical or HPLC grade) without purification.

Where appropriate and if not otherwise stated, all non-aqueous reactions were performed in a flame dried flask under an inert atmosphere. Hexane refers to a mixture of hexane isomers and petroleum ether refers to the fraction of light petroleum ether boiling within the range of 40–60 °C. Brine refers to a saturated aqueous solution of sodium chloride. *In vacuo* refers to the removal of solvents under reduced pressure using a Büchi™ rotary evaporator in a water bath at 40 °C, unless otherwise stated. Vacuum transfer refers to the removal of solvents on a manifold linked to a high vacuum pump at RT. Lyophilization refers to the removal of  $\text{H}_2\text{O}$  and MeCN from aqueous solutions by freeze drying using a CHRIST Alpha 2-4 LSC basic lyophilizer. Celite® refers to Celite® 545 filter aid, treated with sodium carbonate, flux-calcined 23 which was

purchased from Merck. Glass microfiber filter refers to Whatman® borosilicate glass microfiber filters, Grade GF/B.

Compound purity was determined by analytical high-performance liquid chromatography (HPLC) on a PerkinElmer Flexar system with a Binary LC Pump and UV/VIS LC Detector using a normal phase HyperSil GOLD™ Silica column (5 µm, 4.6 × 150 mm) with heptane (A) and IPA (B) as eluents. Gradient methods of 19 minutes were employed with a constant flow rate, and detection at 254 or 220 nm where an isocratic method was employed. Samples were injected by dissolving in the relevant solvent system. The method was A = Heptane; B = IPA; 2.0 mL.min<sup>-1</sup>; 245, 220, or 280 nm, 90% A, 10% B, isocratic 18 min, with 1 min pre-equilibration before injection. Absolute configuration of alcohols **32**, **S14** and **S15** were determined using both enantiomers of α-methoxyphenylacetic acid (MPA) as a chiral derivatizing agent *via* esterification as described by Seco *et al.* and Joffrin *et al.*<sup>1,5</sup>

## Synthetic Protocols, Characterization data, and Compound Assignments

### *myo*-Inositol 1,3,5-orthoformate **11**

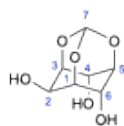

To a solution of *myo*-inositol **10** (5.00 g, 27.8 mmol, 1.0 eq) in DMF (50 mL) were added triethylorthoformate (8.24 g, 55.6 mmol, 2.0 eq) and PTSA·H<sub>2</sub>O (211 mg, 1.11 mmol, 0.04 eq). The reaction mixture was stirred at 110 °C for 18 h and then allowed to cool to RT. The solution was neutralized by the addition of solid NaHCO<sub>3</sub> (10 g) and filtered to remove excess NaHCO<sub>3</sub> and sodium tosylate. The volatile components were removed *in vacuo* and residual DMF was removed using toluene as an azeotrope. The resulting solid was then crystallized from hot MeOH following cooling to -20 °C for 1 h. The resulting colorless crystalline solid was isolated by filtration, washed with CHCl<sub>3</sub> (25 mL), and dried to give *myo*-inositol-1,3,5-orthoformate **11** (4.82 g, 84%): *R*<sub>f</sub> 0.40 (MeCN:EtOAc, 8:2); m.p. 255–260 °C (dec.); <sup>1</sup>H NMR (400 MHz; D<sub>6</sub>-DMSO) δ<sub>H</sub> 5.52–5.38 (2H, m, C(4)OH and C(6)OH), 5.45 (1H, d, *J* 1.4, H-7), 5.30 (1H, br s, C(2)OH), 4.28 (2H, dd, *J* 4.0, 4.0, H-1 and H-3), 4.09–4.05 (1H, m, H-5), 4.02–3.99 (1H, m, H-2), 3.97–3.93 (2H, m, H-4 and H-6); LRMS *m/z* (ESI<sup>+</sup>) 191.0 ([M+H]<sup>+</sup> 100%). These data are in good agreement with the literature values.<sup>5</sup>

### 4,6-Di-O-(4-methoxybenzyl)-*myo*-inositol 1,3,5-orthoformate **12**

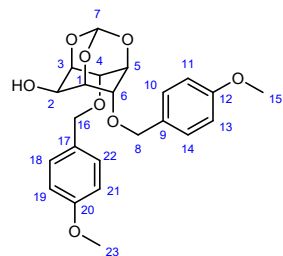

To a solution of orthoformate **11** (5.00 g, 26.3 mmol, 1.0 eq) in anhydrous DMF (200 mL) was added NaH 60% dispersion in mineral oil (2.21 g, 25.2 mmol, 2.1 eq) as a single batch. The solution was stirred for 1.5 h, while being heated to 50 °C. The solution was then cooled to RT and PMBCl (7.13 mL, 52.6 mmol, 2.0 eq) was added dropwise over 10 min. The reaction was stirred for a further 18 h, after which the reaction was quenched with H<sub>2</sub>O, and then concentrated *in vacuo*. Residual DMF was removed using toluene as an azeotrope. The residue was then dissolved in MeCN and extracted with petroleum ether to remove any mineral

oil present. The MeCN layer was then concentrated *in vacuo*. The residue was then dissolved in EtOAc (100 mL) and partitioned with H<sub>2</sub>O (100 mL). The EtOAc phase was removed, and the remaining aqueous fraction was extracted with EtOAc (3 × 100 mL). The combined organic phases were then washed (brine), dried (Na<sub>2</sub>SO<sub>4</sub>), filtered, and concentrated *in vacuo*, before being dissolved in the minimum amount of warm EtOAc. The solution was then allowed to cool where orthoformate **12** formed as a colorless crystalline powder (3.39 g, 30%), which was retrieved *via* filtration and required no further purification. The process was repeated twice to recover the maximum amount of material. *R<sub>f</sub>* 0.50 (petroleum ether:EtOAc, 5:5); m.p. 110–112 °C (EtOAc), [lit.<sup>5</sup> 105–107 °C (hexane:EtOAc)]; <sup>1</sup>H NMR (400 MHz, CDCl<sub>3</sub>) δ<sub>H</sub> 7.22–7.15 (4 H, m, H-11, H-13, H-19, H-20), 6.85–6.79 (4 H, m, H-10, H-14, H-18, H-22), 5.45 (1 H, d, *J* 1.0, H-7), 4.58 (2 H, d, *J* 11.1, H-8', H-16'), 4.50 (2 H, d, *J* 11.1, H-8'', H-16''), 4.42–4.39 (2 H, m, 2 × inositol CH), 4.34 (2 H, t, *J* 3.7, inositol CH), 4.21–4.17 (3 H, m, 3 × inositol CH), 3.80 (6 H, s, H-15, H-23), 2.99 (1 H, d, *J* 11.5, C(2)OH); LRMS (ESI<sup>+</sup>) 453 ([M+Na]<sup>+</sup>, 100%). These data are in good agreement with the literature values.<sup>5</sup>

#### 4,6-Di-O-(4-methoxybenzyl)-*myo*-inositol **13**

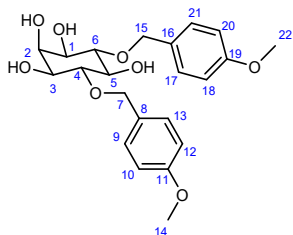

To a solution of the orthoformate **12** (2.00 g, 4.65 mmol, 1.0 eq) in MeOH:H<sub>2</sub>O (132 mL, 10:1 v/v) was added a few drops of 2 M HCl until a pH of 2–3 was achieved. The reaction was stirred at 45 °C for 1 h after which TLC analysis showed potential minor deprotection of the PMB groups. The reaction was then cooled to 40 °C and allowed to stir for a further 3 h where TLC showed most of the starting material had been consumed. The reaction was then cooled to RT and neutralized with sat. aqueous NaHCO<sub>3</sub> until a pH of approximately 7 was reached. The mixture was then concentrated *in vacuo* and the resulting solid was taken up in EtOAc. The remaining solid was removed by filtration and the solution was then passed through a column of

silica gel, eluting with 100% EtOAc to give tetraol **13** (1.56 g, 80%) as a colorless solid.  $R_f$  0.30 (EtOAc); m.p. 134–136 °C (EtOAc), [lit.<sup>5</sup> 144–145 °C (EtOAc)];  $^1\text{H NMR}$  (400 MHz,  $\text{CDCl}_3$ )  $\delta_{\text{H}}$  7.34–7.28 (4 H, m, H-10, H-12, H-18, H-20), 6.93–6.88 (4 H, m, H-9, H-13, H-17, H-21), 4.83 (2 H, d,  $J$  11.1, H-7', H-15'), 4.77 (2 H, d,  $J$  11.1, H-7'', H-15''), 4.16–4.12 (1 H, m, inositol CH), 3.81 (6 H, s, H-14, H-22), 3.67–3.60 (2 H, m, 2  $\times$  inositol CH), 3.56–3.47 (3 H, m, 3  $\times$  inositol CH), 2.55 (1 H, d,  $J$  1.3, -OH), 2.46 (1 H, d,  $J$  2.1, -OH), 2.42 (2 H, d,  $J$  4.9, 2  $\times$  -OH). These data are in good agreement with the literature values.<sup>5</sup>

#### (+)-1D-1-O-Acetyl-4,6-di-O-(4-methoxybenzyl)-myo-inositol **14**

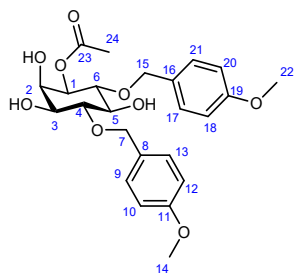

The immobilized Lipozyme® TL-IM (2.00 g) was added to a solution of 4,6-di-O-benzyl-*myo*-inositol **13** (1.20 g, 2.85 mmol, 1.0 eq) in vinyl acetate (250 mL) and hexane (250 mL). After stirring at 45 °C for 18 h the reaction mixture was filtered through a pad of Celite®, washed with hexane (3  $\times$  20 mL) and the combined filtrates were concentrated *in vacuo* to give (–)-**14** (1.30 g, 99%, >99% e.e. other enantiomer not observed) as a colorless amorphous solid, requiring no further purification:  $R_f$  0.61 (EtOAc);  $[\alpha]_D^{25} +24.4$  (c 1.0,  $\text{CHCl}_3$ ). [lit.<sup>5</sup>  $[\alpha]_D^{25} +24.0$  (c 1.0,  $\text{CH}_3\text{Cl}$ )];  $^1\text{H NMR}$  (400 MHz,  $\text{CDCl}_3$ )  $\delta_{\text{H}}$  7.33–7.28 (2 H, m, H-9 and H-13), 7.25–7.21 (2 H, m, H-17 and H-21), 6.92–6.86 (4 H, m, H-10, H-12, H-18 and H-20), 4.91 (1 H, d,  $J$  11.1, H-7'), 4.85 (1 H, dd,  $J$  10.1, 2.7, H-1), 4.74 (1 H, d,  $J$  11.1, H-15'), 4.69–4.62 (2 H, m, H-7'' and H-15''), 4.20 (1 H, dd,  $J$  2.7, 2.7, H-2), 3.89 (1 H, dd,  $J$  10.0, 9.9, H-6), 3.80 (6 H, s, H-14 and H-22), 3.71–3.62 (1 H, m, H-4), 3.61–3.53 (2 H, m, H-3 and H-5), 2.52–2.39 (3 H, m, 3  $\times$  -OH), 2.12 (3 H, s, H-24). These data are in good agreement with the literature values.<sup>5</sup>

#### 1,1-Dimethoxycyclopentane **15**

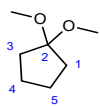

To a solution of cyclopentanone (6.31 mL, 71.3 mmol, 1.0 eq) in hexane (48 mL) were added K-10 montmorillonite clay (10.8 g) and trimethylorthoformate (17.9 mL, 159 mmol, 2.3 eq). The suspension was stirred rapidly for 18 h at RT. The dark brown reaction mixture was then filtered through a pad of Celite® and washed with hexane (2 × 10 mL) and Et<sub>2</sub>O (2 × 10 mL). The combined filtrates were concentrated *in vacuo* to give 1,1-dimethoxycyclopentane **15** (7.08 g, 88%) as a colorless oil with sufficient purity for use in the next step: *R<sub>f</sub>* 0.51 (petroleum ether:EtOAc, 8:2); <sup>1</sup>H NMR (400 MHz; CDCl<sub>3</sub>) δ<sub>H</sub> 3.21 (6H, s, C(2)OCH<sub>3</sub>), 1.80–1.71 (4H, m, H-3 and H-1), 1.69–1.61 (4H, m, H-4 and H-5); These data are in good agreement with the literature values.<sup>5</sup>

#### (-)-1D-1-O-Acetyl-2,3-O-cyclopentylidene-4,6-di-O-(4-methoxybenzyl)-myo-inositol **16**

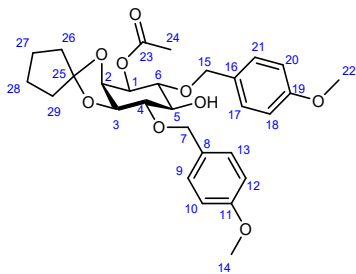

To a solution of (+)-1D-1-O-acetyl-4,6-di-O-(4-methoxybenzyl)-myo-inositol **14** (1.00 g, 2.16 mmol, 1.0 eq) and 1,1-dimethoxycyclopentane **15** (4.22 g, 32.4 mmol, 15 eq) in CH<sub>2</sub>Cl<sub>2</sub> (6 mL) was added PTSA·H<sub>2</sub>O (31 mg, 0.17 mmol, 0.08 eq). The resulting solution was stirred at RT for 8 h, after which time TLC analysis confirmed complete consumption of starting material. The solution was then quenched with a few drops of Et<sub>3</sub>N (until pH 7 was achieved) and concentrated *in vacuo*. The residue obtained was purified using flash column chromatography over silica gel with a Biotage system (petroleum ether:EtOAc, 10:0 to 7:3) to give alcohol **16** (870 mg, 76%) as a pale-yellow oil: *R<sub>f</sub>* 0.63 (petroleum ether:EtOAc, 1:1); [α]<sub>D</sub><sup>25</sup> -24.4 (c 1.0, CHCl<sub>3</sub>), [lit.<sup>5</sup> [α]<sub>D</sub><sup>25</sup> -25.3 (c 1.0, CHCl<sub>3</sub>)]; <sup>1</sup>H NMR (600 MHz, CDCl<sub>3</sub>) δ<sub>H</sub> 7.33–7.28 (2 H, m, H-9 and H-13), 7.27–7.23 (2 H, m, H-17 and H-21), 6.91–6.84 (4 H, m, H-10, H-12, H-18, and H-20), 5.15 (1 H, dd, *J* 8.3, 3.8, H-1), 4.84 (1 H, d, *J* 11.2, H-7'), 4.72 (1 H, d, *J* 11.2, H-15'), 4.68 (1 H, d, *J* 11.2, H-15''), 4.63 (1 H, d, *J* 11.2, H-7''), 4.31 (1 H, dd, *J* 5.5, 3.8, H-2), 4.14 (1 H, dd, *J* 5.9, 5.9, H-3), 3.80 (3 H, s, H-14 or H-22), 3.80 (3

H, s, H-14 or H-22), 3.77 (1 H, dd,  $J$  7.9, 7.9, H-6), 3.63–3.57 (2 H, m, H-4 and H-5), 2.62 (1 H, s, -OH), 2.11 (3 H, s, H-24), 1.98–1.85 (2 H, m, H-26 or H-29), 1.76–1.62 (6 H, m, H-26 or H-29, H-27 and H-28); LRMS  $m/z$  (ESI<sup>+</sup>) 551.2 ([M+Na]<sup>+</sup>, 100%). These data are in good agreement with the literature values.<sup>5</sup>

### (1,5-Dihydro-2,4,3-benzodioxaphosphepin-3-yl)diethylamine 17

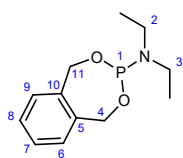

To a two-neck round bottomed flask equipped with a stirrer bar, was added anhydrous Et<sub>2</sub>O and freshly distilled PCl<sub>3</sub> (2.54 mL, 29.1 mmol, 1.0 eq) under an atmosphere of argon. The solution was cooled to -78 °C, after which a solution of freshly distilled anhydrous diethylamine (6.03 mL, 58.2 mmol 2.0 eq) in anhydrous Et<sub>2</sub>O (232 mL) was added dropwise *via* cannula. The reaction mixture was stirred for 1.5 h before being allowed to reach RT and then stirred for an additional 16 h. The resulting precipitate was removed by Schlenk filtration, and the filtrate collected in a two-neck round bottomed flask equipped with a stirrer bar. The filtered solid was washed with anhydrous Et<sub>2</sub>O (3 × 50 mL) and the filtrate was then cooled to -78 °C under an atmosphere of argon. A solution of Et<sub>3</sub>N (8.11 mL, 58.3 mmol, 2.0 eq) and 1,2-benzenedimethanol (4.02 g, 29.1 mmol, 1.0 eq) in a mixture of anhydrous THF (40 mL) and anhydrous Et<sub>2</sub>O (160 mL) was cooled to -78 °C and then added dropwise *via* cannula to the stirred filtrate. After complete addition of the 1,2-benzenedimethanol solution, the reaction was allowed to proceed for 1.5 h, before being allowed to reach RT. The reaction mixture was then stirred for a further 16 h. The resulting precipitate was removed using Schlenk filtration, and the filtered solid was washed with anhydrous Et<sub>2</sub>O (3 × 50 mL). The filtrate was then concentrated *in vacuo* to give (1,5-dihydro-2,4,3-benzodioxaphosphepin-3-yl)diethylamine **17** as a colorless oil (5.26 g, 76%). Analysis by <sup>31</sup>P NMR showed that the product was ~87% pure. This unstable phosphoramidite was therefore used in subsequent steps without further purification or characterization. The product was stored under Ar at -20 °C and was checked by <sup>31</sup>P NMR before

each use:  $^1\text{H NMR}$  (400 MHz;  $\text{CDCl}_3$ )  $\delta_{\text{H}}$  7.31–7.16 (4H, m, H-6 to H-9), 5.18 (2H, dd,  $J$  13.8, 7.0, H-4 and H-11), 4.91 (2H, dd,  $J$  19.4, 13.8, H-4' and H-11'), 3.19 (4H, dq,  $J$  9.9, 7.0, H-2 and H-3), 1.11 (6H, t,  $J$  7.0, C(2) $\text{CH}_3$  and C(3) $\text{CH}_3$ );  $^{31}\text{P NMR}$  (162 MHz,  $\text{CDCl}_3$ )  $\delta_{\text{P}}$  145.3 (P-1); These data are in good agreement with the literature values.<sup>5</sup>

**1D-1-O-Acetate-2,3-O-cyclopentylidene-4,6-di-O-(4-methoxybenzyl)-5-O-(2-oxo-5,6-benzo-1,3,2-dioxaphosphep-2-yl)-myo-inositol (-)-18**

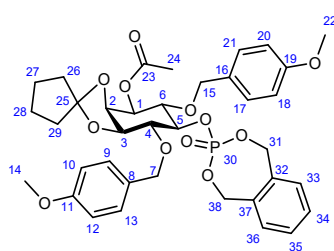

To phosphoramidite **17** (770 mg, 3.22 mmol, 2.0 eq) in anhydrous  $\text{CH}_2\text{Cl}_2$  (8 mL) was added 1*H*-tetrazole (7.16 mL, 3.22 mmol, 2.0 eq, 0.45 M in MeCN). After stirring at RT for 10 min, a solution of alcohol **(-)-16** (850 mg, 1.61 mmol, 1.0 eq) in anhydrous  $\text{CH}_2\text{Cl}_2$  (2 mL) was added dropwise. The cloudy reaction mixture was allowed to stir for 16 h, after which the reaction mixture was cooled to  $-78\text{ }^\circ\text{C}$  and *m*CPBA (722 mg, 3.22 mmol, 2.0 eq, 77%) was added in a single portion. The reaction mixture was stirred at  $-78\text{ }^\circ\text{C}$  and then gradually warmed to RT and stirred for a further 3 h. The reaction was then quenched with an aqueous solution of  $\text{Na}_2\text{S}_2\text{O}_3$  (10% w/v, 20 mL) and the aqueous layer was extracted with  $\text{CH}_2\text{Cl}_2$  (3  $\times$  20 mL). The combined organic layers were washed with brine (60 mL), dried over  $\text{Na}_2\text{SO}_4$ , filtered, and concentrated *in vacuo*. Purification using column chromatography over silica gel (petroleum ether:EtOAc, 10:0 to 6:4) afforded **(-)-18** (1.06 g, 92%) as a colorless foam:  $R_f$  0.34 (petroleum ether:EtOAc, 1:1);  $[\alpha]_D^{25}$   $-2.9$  (c 1.0,  $\text{CHCl}_3$ );  $\nu_{\text{max}}$ (thin film)/ $\text{cm}^{-1}$  2398, 1744, 1613, 1514, 1247, 1017;  $^1\text{H NMR}$  (600 MHz,  $\text{CDCl}_3$ )  $\delta_{\text{H}}$  7.34–7.31 (4 H, m, H-9, H-13, H-33, H-36), 7.29–7.26 (2 H, m, H-17, H-21), 7.21–7.17 (2 H, m, H-34 and H-35), 6.87–6.81 (4 H, m, H-10, H-12, H-18, H-20), 5.23 (1 H, dd,  $J$  8.5, 3.6, H-1), 5.18 (1 H, dd,  $J$  15.8, 13.9, H-31' or H-38'), 5.12 (1 H, dd,  $J$  16.4, 13.9, H-31' or H-38'), 5.09–5.00 (2 H, m, H-37'' and H-38''), 4.77 (1 H, d,  $J$  10.8, H-15'), 4.76 (1 H, d,  $J$  11.1, H-7'), 4.68 (1 H, d,  $J$  11.2, H-7''), 4.63–4.58 (2 H, m, H-5, H-15''), 4.38 (1 H, dd,  $J$  6.3, 3.6, H-2), 4.20 (1 H,

dd,  $J$  6.0, 6.0, H-3), 4.02 (1 H, dd,  $J$  8.5, 6.8, H-6), 3.89 (1 H, dd,  $J$  7.5, 6.0, H-4), 3.79 (6 H, s, H-14 and H-22), 2.08 (3 H, s, H-24), 1.98–1.85 (2 H, m, H-26', H-29'), 1.73–1.61 (6 H, m, H-26'', H-27, H-28, H-29'');  $^{31}\text{P}$  NMR (243 MHz,  $\text{CDCl}_3$ )  $\delta_{\text{P}}$  -0.7 (P-30);  $^{13}\text{C}$  NMR (151 MHz,  $\text{CDCl}_3$ )  $\delta_{\text{C}}$  170.1 (C-23), 159.35, 159.34 (C-11 and C-19), 135.49, 135.45 (C-32 and C-37), 130.33, 130.23 (C-8 and C-16), 129.82 (C-9 and C-13), 129.63 (C-17, C-21), 129.07, 129.04 (C-33 and C-36), 128.8 (C-34 and C-35), 120.1 (C-25), 113.85, 113.76 (C-10, C-12, C-18, C-20), 80.8 (d,  $J$  6.5, C-5), 78.9 (d,  $J$  3.3, C-4), 77.7 (d,  $J$  4.4, C-6), 77.6 (C-3), 68.5 (d,  $J$  2.2, C-31 or C-38), 68.4 (d,  $J$  2.7, C-31 or C-38), 74.0 (C-15), 73.7 (C-2), 72.9 (C-7), 70.5 (C-1), 68.45 (d,  $J$  2.2, C-31 or C-38), 68.41 (d,  $J$  2.7, C-31 or C-38), 55.4 (C-14 and C-22), 36.9, 36.7, 24.1, 23.5 (C-26, C-27, C-28 and C-29), 21.2 (C-24); HRMS  $m/z$  (ESI $^{+}$ ) found 711.2551 [M+H] $^{+}$  ( $\text{C}_{37}\text{H}_{44}\text{O}_{12}\text{P}$  requires 711.2565 [M+H] $^{+}$ ).

### 1*D*-2,3-*O*-Cyclopentylidene-4,6-di-*O*-(4-methoxybenzyl)-5-*O*-(2-oxo-5,6-benzo-1,3,2-dioxaphosphep-2-yl)-*myo*-inositol (+)-19

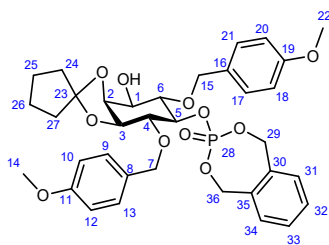

To a solution of (-)-18 (600 mg, 0.884 mmol, 1.0 eq) in MeOH (80 mL) was added ground  $\text{K}_2\text{CO}_3$  (233 mg, 1.68 mmol, 2.0 eq). The reaction mixture was stirred at RT for 1 h, after which TLC confirmed the reaction had gone to completion. The solution was neutralized with 1 M HCl (pH 7) and the volatiles partially removed *in vacuo*.  $\text{H}_2\text{O}$  (30 mL) was added to the resulting residue and the aqueous layer was extracted with EtOAc (4  $\times$  10 mL). The combined organic fractions were washed with brine (40 mL), dried over  $\text{Na}_2\text{SO}_4$ , filtered, and concentrated *in vacuo*. The resulting residue was purified by column chromatography over silica gel (petroleum ether:EtOAc, 10:0 to 3:7) and afforded alcohol (+)-19 (462 mg, 82%) as a colorless solid:  $R_f$  0.34 (petroleum ether/EtOAc, 1:1);  $[\alpha]_D^{25}$  +0.5 (c 2.0,  $\text{CHCl}_3$ ); m.p. 125–127  $^{\circ}\text{C}$  (MeCN);  $\nu_{\text{max}}$  (thin film)/ $\text{cm}^{-1}$  2938, 1613, 1514, 1249, 1016;  $^1\text{H}$  NMR (600 MHz,  $\text{CDCl}_3$ )  $\delta_{\text{H}}$

7.35–7.28 (6 H, m, H-9, H-13, H-17, H-21, H-31, H-34), 7.24–7.15 (2 H, m, H-32, H-33), 6.88–6.85 (2 H, m, H-10, H-12 or H-18, H-20), 6.83–6.80 (2 H, m, H-10, H-12 or H-18, H-20), 5.22–5.03 (4 H, m, H-29 and H-36), 4.87 (1 H, d,  $J$  10.8, H-7' or H-15'), 4.77 (1 H, d,  $J$  11.2, H-7' or H-15'), 4.66 (1 H, d,  $J$  11.2, H-7'' or H-15''), 4.63–4.58 (2 H, m, H-5 and H-7'' or H-15''), 4.35 (1 H, dd,  $J$  6.5, 3.1, H-2), 4.20 (1 H, dd,  $J$  6.5, 6.5, H-3), 3.99–3.93 (3 H, m, H-1, H-4, H-6), 3.79 (3 H, s, H-14 or H-22), 3.78 (3 H, s, H-14 or H-22), 2.49 (1 H, d,  $J$  3.1, C(1)OH), 1.99–1.88 (2 H, m, C-24' and C-27''), 1.79–1.64 (6 H, m, H-24'', H-25, H-26, H-27'');  $^{31}\text{P}$  NMR (243 MHz,  $\text{CDCl}_3$ )  $\delta_{\text{P}}$  -0.7 (P-28);  $^{13}\text{C}$  NMR (151 MHz,  $\text{CDCl}_3$ )  $\delta_{\text{C}}$  159.5, 159.3 (C-11 and C-19), 135.6, 135.5 (C-30 and C-35), 130.4, 130.3 (C-8 and C-16), 130.0 (C-9 and C-13), 129.7 (C-17 and C-21), 129.1 (d,  $J$  7.1, C-32 or C-33), 128.9 (d,  $J$  6.5, C-32 or C-33), 119.9 (C-23), 114.0, 113.7 (C-10, C-12, C-18 and C-20), 81.1 (d,  $J$  6.5, C-5), 79.7 (d,  $J$  3.8, H-4 or H-6), 79.6 (d,  $J$  3.8, H-4 or H-6), 77.6 (C-3), 75.1 (C-2), 73.9, 72.9 (C-7, C-15), 68.8 (C-1), 68.5 (d,  $J$  6.5, C-29 or C-36), 68.4 (d,  $J$  6.0, C-29 or C-36), 55.41, 55.39 (C-14 and C-22), 36.6, 24.1, 23.4 (C-24, C-25, C-26, and C-27); LRMS ( $\text{ESI}^+$ ) 691 ( $[\text{M}+\text{Na}]^+$ , 100%); HRMS  $m/z$  ( $\text{ESI}^+$ ) found 669.2479  $[\text{M}+\text{H}]^+$  ( $\text{C}_{35}\text{H}_{41}\text{O}_{11}\text{P}$  requires 669.2459  $[\text{M}+\text{H}]^+$ ).

### 1-Tetrahydropyranyloxy-11-bromoundecane **21**

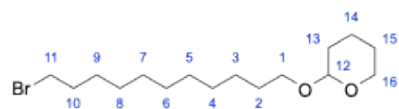

To a solution of 1-bromo-11-hydroxyundecane **20** (20.0 g, 79.6 mmol, 1 eq) in dichloromethane (250 mL) was added 3,4-dihydro-2*H*-pyran (30.1 g, 368 mmol, 4.5 eq) and pyridinium *p*-toluene sulfonate (1.20 g, 4.78 mmol, 0.06 eq). The resulting solution was stirred for 18 h at RT. The reaction was then quenched by the addition of solid sodium hydrogen carbonate (1 g) and dried by vigorously stirring the solution with  $\text{MgSO}_4$ . The mixture was then filtered through a large plug of silica gel, which was subsequently washed with petroleum ether. The

combined organic filtrates were then concentrated *in vacuo* to give 1-tetrahydropyranyloxy-11-bromoundecane **21** as a colorless oil (26.4 g, 99%):  $R_f$  0.73 (petroleum ether:EtOAc, 9:1);  $^1\text{H NMR}$  (400 MHz,  $\text{CDCl}_3$ )  $\delta_{\text{H}}$  4.57 (dd,  $J$  4.5, 2.7, 1H, H-12), 3.92–3.81 (m, 1H, H-16'), 3.72 (dt,  $J$  9.6, 6.9, 1H, H-13'), 3.56–3.44 (m, 1H, H-16''), 3.44–3.32 (m, 3H, H-1, H-13''), 1.93–1.22 (m, 24H, H-2 to H-11, H-14, H-15); LRMS  $m/z$  (ESI<sup>+</sup>) 357.162 ( $[\text{M}+\text{Na}]^+$ , 100%); These data are in good agreement with the literature values.<sup>6</sup>

### 13-**{(Tetrahydropyran-2'-yl)oxy}tridecan-1-yne 22**

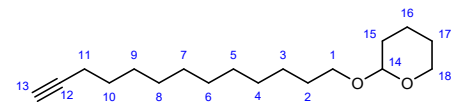 A solution of lithium acetylide (ethylenediamine complex 90%, 3.62 g, 39.4 mmol, 1.32 eq) in anhydrous DMSO (20 mL) was added dropwise to a solution of 1-tetrahydropyranyloxy-11-bromoundecane **21** in anhydrous DMSO (50 mL) under an atmosphere of argon. The reaction was stirred for 16 h, after which the reaction was quenched with distilled  $\text{H}_2\text{O}$  (40 mL) until effervescence ceased. The mixture was then extracted with  $\text{Et}_2\text{O}$  (4 × 40 mL), the combined organic extracts were dried over  $\text{Na}_2\text{SO}_4$  and were then concentrated *in vacuo*. The residue was purified by column chromatography over silica gel (petroleum ether: $\text{Et}_2\text{O}$ , 10:0 to 9:1) resulting in **22** as a colorless oil (5.45 g, 65%):  $R_f$  0.52 (petroleum ether: $\text{Et}_2\text{O}$ , 9:1);  $\nu_{\text{max}}$  (thin film)/ $\text{cm}^{-1}$  3312, 2929, 2855, 2118, 1034, 631;  $^1\text{H NMR}$  (400 MHz,  $\text{CDCl}_3$ )  $\delta_{\text{H}}$  4.57 (1H, dd,  $J$  4.4, 2.7, H-14), 3.87 (1H, m, H-18'), 3.72 (1H, dt,  $J$  9.6, 6.8, H-1'), 3.53–3.46 (1H, m, H-18''), 3.38 (1H, dt,  $J$  9.6, 6.8, H-1''), 2.17 (2H, td,  $J$  7.1, 2.7, H-11), 1.93 (1H, t,  $J$  2.7, H-13), 1.88–1.23 (m, 24H, H-2 to H-10, H-15 to H-17);  $^{13}\text{C NMR}$  (101 MHz,  $\text{CDCl}_3$ )  $\delta_{\text{C}}$  99.0 (C-14), 84.9 (C-12), 68.2 (C-13), 67.8 (C-1), 62.5 (C-18), 31.0 (C-15), 29.9, 29.70, 29.68, 29.62, 29.2, 28.9, 28.7, 26.4, 25.7 (C-2 to C-10, C-16, C-17) 19.9 (C-15), 18.5

(C-11); LRMS  $m/z$  (ESI<sup>+</sup>) 303.189 ([M+Na]<sup>+</sup>, 100%); HRMS  $m/z$  (ESI<sup>+</sup>) found 303.2299 [M+Na]<sup>+</sup> (C<sub>18</sub>H<sub>32</sub>O<sub>2</sub>Na requires 303.2295 [M+Na]<sup>+</sup>).

### Tridec-12-yn-1-ol **23**

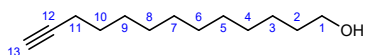

To a solution of THP-protected alcohol **22** (5.00 g, 17.8 mmol, 1 eq) in ethanol (89 mL), was added HCl<sub>(aq)</sub> (2 M, 0.89 mL). The mixture was heated under reflux for 16 h, after which the reaction was diluted with distilled H<sub>2</sub>O (100 mL). The aqueous solution was then extracted with Et<sub>2</sub>O (3 × 100 mL). The combined extracts were then dried over Na<sub>2</sub>SO<sub>4</sub> and were then concentrated under a stream of nitrogen resulting in tridec-12-yn-1-ol **23** as a colorless solid (3.35 g, 96%):  $R_f$  0.43 (petroleum ether:EtOAc, 8:2); m.p. 28–30 °C (Et<sub>2</sub>O) [lit.<sup>7</sup> 30–32 °C]; <sup>1</sup>H NMR (400 MHz, CDCl<sub>3</sub>)  $\delta_H$  3.64 (2H, t,  $J$  6.6, H-1), 2.18 (2H, td,  $J$  7.1, 2.7, H-11), 1.93 (1H, t,  $J$  2.7, H-13), 1.62–1.47 (4H, m, H-10, H-2), 1.45–1.24 (14H, m, H-3 to H-9). These data are in good agreement with the literature values.<sup>7,8</sup>

### Tridec-12-ynal **24**

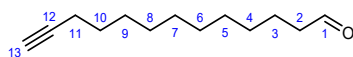

Anhydrous DMSO (11.6 mL) in CH<sub>2</sub>Cl<sub>2</sub> (30 mL) was added dropwise over 10 min to a stirred solution of oxalyl chloride (7 mL) in CH<sub>2</sub>Cl<sub>2</sub> (150 mL) at –78 °C, under an atmosphere of argon. After 30 min, tridec-12-yn-1-ol **23** (7.24 g, 40.7 mmol, 1 eq) in CH<sub>2</sub>Cl<sub>2</sub> (60 mL) was added dropwise *via* cannula over 30 min. Following 1 h of stirring, 35 mL of Et<sub>3</sub>N was added, and the reaction was allowed to stir for a further 1.5 h at –78 °C. The reaction was then allowed to reach RT and stirred for a further 3 h. The reaction mixture was then washed with 5% aqueous HCl (200 mL), saturated NaHCO<sub>3(aq)</sub> (300 mL) and finally brine (300 mL), before being dried over Na<sub>2</sub>SO<sub>4</sub>, and then concentrated *in vacuo* to afford

tridec-12-ynal **24** as a brown oil (5.23 g, 66%):  $R_f$  0.67 (petroleum ether:EtOAc, 9:1);  $^1\text{H NMR}$  (400 MHz,  $\text{CDCl}_3$ )  $\delta_{\text{H}}$  9.76 (1H, t,  $J$  1.9, H-1), 2.41 (2H, td,  $J$  7.4, 1.9, H-2), 2.18 (2H, td,  $J$  7.1, 2.7, H-11), 1.93 (1H, t,  $J$  2.7, H-13), 1.67–1.58 (2H, m, H-10 or H-3), 1.56–1.47 (2H, m, H-10 or H-3), 1.43–1.24 (12H, m, H-4 to H-9). These data are in good agreement with the literature values.<sup>8</sup>

### Ethyl 4-oxohexadec-15-ynoate **25**

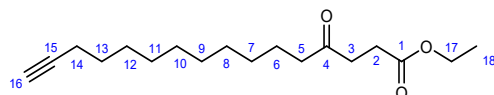

Tridec-12-ynal **24** (6.66 g, 34.3 mmol, 1.0 eq) and ethyl acrylate (8.00 mL, 73.5 mmol, 2.1 eq) in 1,4-dioxane (75 mL) was added dropwise *via* cannula over 2 h to a suspension of 3-benzyl-5-(2-hydroxyethyl)-4-methylthiazolium chloride (1.30 g, 4.80 mmol, 0.14 eq) in  $\text{Et}_3\text{N}$  (3.35 mL, 24.0 mmol, 0.7 eq) and 1,4-dioxane (75 mL) at 80 °C under an atmosphere of argon and the reaction was stirred for 56 h. The reaction mixture was then concentrated *in vacuo* and the resultant residue was redissolved in  $\text{CH}_2\text{Cl}_2$  (250 mL), which was washed in succession with 10%  $\text{H}_2\text{SO}_{4(\text{aq})}$  (250 mL), saturated  $\text{NaHCO}_3$  (250 mL), and then brine (250 mL). The organic mixture was then dried over  $\text{Na}_2\text{SO}_4$ , filtered, and concentrated *in vacuo*. Purification using silica gel column chromatography (petroleum ether:EtOAc, 100:0 to 93:7) resulted in **25** (3.85 g, 41%) with an unknown impurity that could not feasibly be separated on large scale. The bulk of the material was used without further purification; however, a small amount was further purified using column chromatography over a slow gradient and large volume of silica gel (petroleum ether:EtOAc, 100:0 to 95:5) for analysis:  $R_f$  0.76 (petroleum ether:EtOAc, 8:2); m.p. 34–35 °C (petroleum ether:EtOAc);  $\nu_{\text{max}}$  (thin film)/ $\text{cm}^{-1}$  3297, 2927, 1735, 1716, 1186, 631;  $^1\text{H NMR}$  (600 MHz,  $\text{CDCl}_3$ )  $\delta_{\text{H}}$  4.12 (2 H, q,  $J$  7.2, H-17), 2.71 (2 H, t,  $J$  6.6, H-3), 2.57 (2 H, t,  $J$  6.6, H-2), 2.43 (2 H, t,  $J$  7.5, H-5), 2.17 (2 H, td,  $J$  7.2, 2.6, H-14), 1.93 (1 H, t,  $J$  2.6, H-16), 1.61–1.55 (2 H, m, H-6), 1.54–1.49 (2 H, m, H-13), 1.41–1.34 (2 H, m, H-12), 1.31–1.26 (10 H, m, H-7 to H-11), 1.25 (3 H, t,  $J$  7.2, H-18);  $^{13}\text{C NMR}$  (151 MHz,  $\text{CDCl}_3$ )  $\delta_{\text{C}}$  209.3 (C-4), 173.0 (C-1), 84.9 (C-15), 68.2 (C-16), 60.7 (C-17), 43.0 (C-5), 37.2 (C-3), 29.6, 29.51, 29.50, 29.3, 29.2 (C-11 to C-7), 28.9 (C-12), 28.6 (C-13), 28.2 (C-2), 23.9 (C-

6), 18.5 (C-14), 14.3 (C-18); HRMS  $m/z$  (ESI<sup>+</sup>) found 295.2265 [M+H]<sup>+</sup> (C<sub>18</sub>H<sub>31</sub>O<sub>3</sub> requires 295.2268 [M+H]<sup>+</sup>).

#### 4-Oxohehexadec-15-ynoic acid **26**

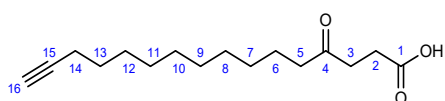

To a solution of ethyl 4-oxohehexadec-15-ynoate **25** (3.18 g, 10.8 mmol, 1.0 eq) in methanol (82 mL), was added LiOH (1.29 g, 54.0 mmol, 5.0 eq) and H<sub>2</sub>O (0.97 mL, 54 mmol, 5.0 eq). The mixture was stirred at RT for 16 h before the solution was half-concentrated *in vacuo* and then acidified to a pH of 3 using aqueous HCl (1 M). The resulting solution was then extracted with dichloromethane and the combined organic layers were then dried over anhydrous Na<sub>2</sub>SO<sub>4</sub>. The solution was then concentrated *in vacuo* and crystallized under a stream of nitrogen which resulted in 4-oxohehexadec-15-ynoic acid **26** as a colorless crystalline solid (2.85 g, 99%):  $R_f$  0.21 (petroleum ether:EtOAc:AcOH, 80:19:1); m.p. 75–80 °C (CH<sub>2</sub>Cl<sub>2</sub>);  $\nu_{\max}$  (thin film)/cm<sup>-1</sup> 3284, 2851, 1702, 906, 729, 647; <sup>1</sup>H NMR (600 MHz, CDCl<sub>3</sub>)  $\delta_H$  2.71 (2 H, t,  $J$  6.5, H-3), 2.63 (2 H, t,  $J$  6.5, H-2), 2.44 (2 H, t,  $J$  7.4, H-5), 2.17 (2 H, td,  $J$  7.1, 2.6, H-14), 1.93 (1 H, t,  $J$  2.6, H-16), 1.61–1.55 (2 H, m, H-6), 1.55–1.48 (2 H, m, H-13), 1.41–1.34 (2 H, m, H-12), 1.32–1.24 (10 H, m, H-11 to H-7); <sup>13</sup>C NMR (151 MHz, CDCl<sub>3</sub>)  $\delta_C$  209.1 (C-4), 178.1 (C-1), 84.9 (C-15), 68.2 (C-16), 42.9 (C-5), 36.9 (C-3), 29.5, 29.5, 29.5, 29.3, 29.2 (C-7 to C-11), 28.9 (C-12), 28.6 (C-13), 27.8 (C-2), 23.9 (C-6), 18.5 (C-14); LRMS  $m/z$  531.309 ([2M-H]<sup>-</sup>, 100%); HRMS  $m/z$  (ESI<sup>+</sup>) found 267.1955 [M+H]<sup>+</sup> (C<sub>16</sub>H<sub>27</sub>O<sub>3</sub> requires 267.1955 [M+H]<sup>+</sup>).

#### 3-[3-(Dodec-11-yn-1-yl)diazirin-3-yl]propanoic acid **27**

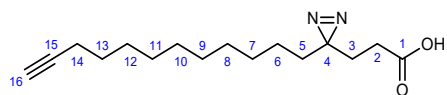

A dried round bottom flask containing acid **26** (1.00 g, 3.25 mmol, 1.0 eq) under an atmosphere of argon was cooled to 0 °C and was charged with 7 M NH<sub>3</sub> in methanol (60 mL). The resulting solution was stirred at 0 °C for 3 h before hydroxylamine-*O*-sulfonic acid (594 mg, 5.25 mmol, 1.4 eq) was added as a single batch. The resulting solution was stirred at 0 °C for 1 h and was then allowed to warm to room temperature over 16 h. The resulting suspension was evaporated to dryness *in vacuo* and resuspended in anhydrous methanol (30 mL). The solid by-product was filtered off through a PTFE syringe filter and the filtrate was collected in a dry RBF, equipped with a stir bar under argon. The solution was cooled to 0 °C and anhydrous diisopropylethylamine (2 mL) was added, followed by iodine (portion-wise), until a dark brown colour persisted for more than 30 min — indicating total oxidation of the diaziridine intermediate. The solution was then partially concentrated before being diluted with EtOAc (60 mL) and washed with 1 M HCl (60 mL, 10% (w/v), Na<sub>2</sub>S<sub>2</sub>O<sub>4</sub> (60 mL portions until clarified) and brine (60 mL). Volatiles were removed *in vacuo* and the resulting residue was purified by silica gel column chromatography (petroleum ether:EtOAc, 100:0 to 88:12 with 0.1% acetic acid), resulting in diazirine **27** as a colorless waxy amorphous solid (467 mg, 52%): *R<sub>f</sub>* 0.48 (petroleum ether:EtOAc:AcOH, 79:20:1); *ν*<sub>max</sub> (thin film)/cm<sup>-1</sup> 3288, 2852, 1694, 1462, 932; <sup>1</sup>H NMR (600 MHz, CDCl<sub>3</sub>) δ<sub>H</sub> 2.20–2.12 (4 H, m, H-2, H-14), 1.93 (1 H, t, *J* 2.6, H-16), 1.73 (2 H, t, *J* 7.8, H-3), 1.52 (2 H, p, *J* 7.2, H-13), 1.38 (4 H, m, H-12, H-5), 1.32–1.18 (10 H, m, H-7 to H-11), 1.10–1.04 (2 H, m, H-6); <sup>13</sup>C NMR (151 MHz, CDCl<sub>3</sub>) δ<sub>C</sub> 177.9 (C-1), 84.9 (C-15), 68.2 (C-16), 32.8 (C-5), 29.54, 29.52, 29.47, 29.3, 29.2 (C-7 to C-11), 28.9 (C-12), 28.6 (C-13), 28.4 (C-2), 28.20 (C-4), 28.17 (C-3), 23.9 (C-6), 18.5 (C-14); HRMS *m/z* (ESI<sup>-</sup>) found 277.1919 [M-H]<sup>-</sup> (C<sub>16</sub>H<sub>25</sub>O<sub>2</sub>N<sub>2</sub> requires 277.1911 [M-H]<sup>-</sup>).

**(-)-(S)-(2,2-Dimethyl-1,3-dioxolan-4-yl)methyl palmitate (-)-29**

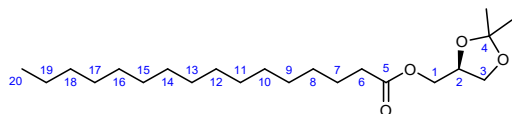

*N,N'*-Dicyclohexylcarbodiimide (6.24 g, 30.2 mmol,

2.0 eq) was added to a stirred solution of (*R*)-(-)-2,3-

isopropylidene-*sn*-glycerol (-)-**28** (2.00 g, 15.1 mmol,

1.0 eq), palmitic acid (3.88 g, 15.1 mmol, 1.0 eq) and 4-DMAP (0.11 g, 0.91 mmol, 0.06 eq) in

CH<sub>2</sub>Cl<sub>2</sub> (45 mL) and was stirred for 16 h. The mixture was then diluted with hexane (20 mL),

filtered through Celite® and washed with hexane (3 × 10 mL). The combined filtrates were

concentrated *in vacuo*. The residue obtained was purified by column chromatography over silica

gel (petroleum ether:EtOAc, 95:5) to yield (-)-**29** (4.33 g, 77%) as a colorless solid: *R<sub>f</sub>* 0.18

(petroleum ether:EtOAc, 20:1); m.p. 29–30 °C (heptane:EtOAc), [lit.<sup>9</sup> 32.0–32.5 °C,

pentane:EtOAc]; [α]<sub>D</sub><sup>25</sup> -8.4 (c 1.0, hexane), [lit.<sup>9</sup> [α]<sub>D</sub><sup>20</sup> -7.91 (c 3.14, hexane)]; <sup>1</sup>H NMR (400 MHz,

CDCl<sub>3</sub>) δ<sub>H</sub> 4.35–4.28 (1H, m, H-2), 4.16 (1H, dd, *J* 11.5, 4.7, H-1'), 4.10 (1H, d, *J* 6.2, H-3'), 4.09–

4.05 (1H, m, H-1''), 3.74 (1H, dd, *J* 8.4, 6.2, H-3''), 2.34 (2H, t, *J* 7.6, H-6), 1.67–1.57 (2H, m, H-

7), 1.44 (3H, s, C(4)CH<sub>3</sub>), 1.37 (3H, s, C(4)CH<sub>3</sub>), 1.33–1.23 (29H, m, H-8 to H-19), 0.92–0.84 (3H,

m, H-20); LRMS *m/z* (ESI<sup>+</sup>) 393.350 ([M+Na]<sup>+</sup>, 100%); These data are in good agreement with

the literature values.<sup>9</sup>

### (+)-(*R*)-2-Hydroxy-3-((triethylsilyl)oxy)propyl palmitate **30**

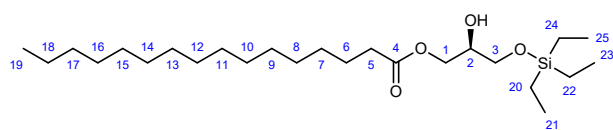

Acetonide (-)-**29** (2.04 g, 5.50 mmol, 1.0 eq)

was dissolved in anhydrous dichloroethane (40

mL) under an atmosphere of argon. DIPEA

(1.92 mL, 11.0 mmol, 2 eq) was added followed by TESOTf (1.49 mL, 6.60 mmol, 1.2 eq) and the

mixture was stirred at reflux for 24 h. Additional TESOTf (0.50 mL, 2.20 mmol, 0.4 eq) was then

added due to presence of remaining starting material, and the mixture was stirred for a further 24

h. The reaction was cooled to RT, diluted with petroleum ether and washed with 0.1 M aqueous

HCl. The aqueous fraction was extracted with petroleum ether (3 × 10 mL). The combined organic

fractions were then washed with brine, dried over Na<sub>2</sub>SO<sub>4</sub> and concentrated *in vacuo*. The resulting residue was then dissolved in a mixture of THF (42 mL) and 10% aqueous Na<sub>2</sub>CO<sub>3</sub> (18 mL), before I<sub>2</sub> (2.09 g, 8.25 mmol, 1.5 eq) was added. The reaction was stirred for 2 h and then quenched with 10% aqueous Na<sub>2</sub>S<sub>2</sub>O<sub>3</sub> (100 mL). The solution was extracted with Et<sub>2</sub>O (3 × 100 mL), and the combined Et<sub>2</sub>O fractions were washed with brine (300 mL), dried over Na<sub>2</sub>SO<sub>4</sub>, filtered, and concentrated *in vacuo*. The resulting residue was then purified by silica gel column chromatography (cyclohexane:EtOAc, 100:0 to 90:10) giving alcohol **(+)-30** as a yellow oil (438 mg, 18%): *R<sub>f</sub>* 0.17 (petroleum ether:EtOAc, 95:5);  $[\alpha]_D^{25} +1.4$  (c 4.0, CHCl<sub>3</sub>); <sup>1</sup>H NMR (400 MHz, CDCl<sub>3</sub>) δ<sub>H</sub> 4.16 (1 H, dd, *J* 11.5, 5.0, H-1'), 4.11 (1 H, dd, *J* 11.5, 5.9, H-1''), 3.92–3.84 (1 H, m, H-2), 3.67 (1 H, dd, *J* 10.1, 4.6, H-3'), 3.60 (1 H, dd, *J* 10.1, 5.7, H-3''), 2.54 (1 H, d, *J* 5.3, C(2)OH), 2.34 (2 H, t, *J* 7.5, H-5), 1.62 (2 H, p, *J* 7.5, H-6), 1.35–1.23 (24 H, m, H-7 to H-18), 0.96 (9 H, t, *J* 7.9, H-21, H-23, H-25), 0.88 (3 H, t, *J* 6.7, H-19), 0.62 (6 H, q, *J* 7.9, H-20, H-22, H-24); LRMS (ESI<sup>+</sup>) 467.3 ([M+Na]<sup>+</sup>, 100%), 911.5 ([2M+Na]<sup>+</sup>, 100%); These data are in good agreement with the literature values.<sup>10</sup>

**(+)-(R)-2-((3-(3-(Dodec-11-yn-1-yl)-3H-diazirin-3-yl)propanoyl)oxy)-3-(triethylsilyl)oxy)propyl palmitate **31****

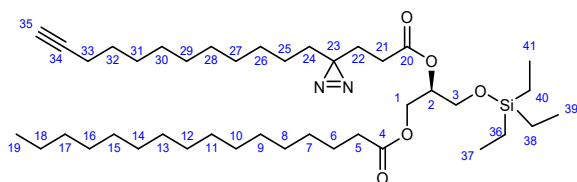

To a solution of alcohol **(+)-30** (240 mg, 0.540 mmol, 1.0 eq) in anhydrous CH<sub>2</sub>Cl<sub>2</sub> (2 mL) was added DCC (223 mg, 1.08 mmol, 2.0 eq), 4-DMAP (4 mg, 0.03 mmol, 0.06 eq) and diazirine **50** (150 mg, 1.08 mmol, 1.0 eq). The solution was stirred at RT for 18 h, after which the reaction mixture was diluted with hexane (10 mL). The suspension was filtered through a PTFE syringe filter, and the filtrate was concentrated *in vacuo* at RT. The resulting residue was purified by column chromatography over silica gel (petroleum ether:Et<sub>2</sub>O, 10:0 to 9:1) which yielded **(+)-31** (324 mg, 85%) as a colorless oil:

$R_f$  0.44 (hexane:Et<sub>2</sub>O, 90:10);  $[\alpha]_D^{25} +8.8$  (c 1.0, CHCl<sub>3</sub>);  $\nu_{\max}$  (thin film)/cm<sup>-1</sup> 3313, 2925, 2854, 1744, 1459, 1167, 1115; <sup>1</sup>H NMR (600 MHz, CDCl<sub>3</sub>)  $\delta_H$  5.08–5.04 (1 H, m, H-2), 4.35 (1 H, dd,  $J$  11.9, 3.6, H-1'), 4.16 (1 H, dd,  $J$  11.9, 6.1, H-1''), 3.75–3.68 (2 H, m, H-3), 2.30 (1 H, t,  $J$  7.5, H-5), 2.17 (2 H, td,  $J$  7.2, 2.6, H-33), 2.13–2.09 (2 H, m, H-21), 1.93 (1 H, t,  $J$  2.6, H-35), 1.72 (1 H, t,  $J$  7.8, H-22), 1.60 (2 H, p,  $J$  7.4, H-6), 1.52 (1 H, p,  $J$  7.2, H-32), 1.41–1.34 (4 H, m, H-31, H-29), 1.34–1.18 (34 H, m, H-7 to H-18 and H-24 to H-28), 1.11–1.03 (2 H, m, H-30), 0.94 (9 H, t,  $J$  7.9, H-37, H-39, H-41), 0.88 (3 H, t,  $J$  7.0, H-19), 0.59 (6 H, q,  $J$  7.9, H-36, H-38, H-40); <sup>13</sup>C NMR (151 MHz, CDCl<sub>3</sub>)  $\delta_C$  173.6 (C-4), 171.8 (C-20), 84.9 (C-34), 72.4 (C-2), 68.2 (C-35), 62.4 (C-1), 61.2 (C-3), 34.3 (C-5), 32.9 (C-24), 32.1, 29.8, 29.8, 29.8, 29.6, 29.6, 29.6, 29.5, 29.4, 29.3, 29.3, 29.2, 28.9, 28.8, 28.6, 28.4 (C-7 to C-17, C-21 to C-22, C-26 to C-32), 28.3 (C-23), 25.1 (C-6), 24.0 (C-25), 22.8 (C-18), 18.5 (C-33), 14.3 (C-19), 6.8 (C-37, C-39, C-41), 4.4 (C-36, C-38, C-40); HRMS  $m/z$  (ESI<sup>+</sup>) found 727.5410 [M+Na]<sup>+</sup> (C<sub>41</sub>H<sub>76</sub>O<sub>5</sub>N<sub>2</sub>SiNa requires 727.5416 [M+Na]<sup>+</sup>).

**(-)-(S)-2-((3-(3-(Dodec-11-yn-1-yl)-3H-diazirin-3-yl)propanoyl)oxy)-3-hydroxypropyl palmitate **32****

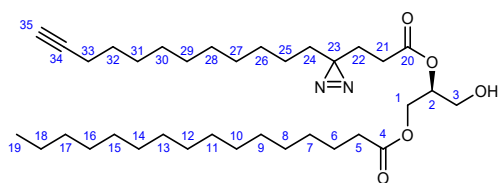

**Method 1:** Aqueous acetic acid (AcOH:H<sub>2</sub>O 4:1 v/v, 2 mL) was added to protected diglyceride **S24** (374 mg, 0.419 mmol, 1.0 eq) and stirred vigorously. MeCN was

then added dropwise in an attempt to homogenize the solution. The mixture was then stirred at 50 °C for 3.5 h, after which TLC showed remaining starting material. The solution was concentrated *in vacuo* and the resulting residue was redissolved in acetic acid (2 mL) and a few drops of H<sub>2</sub>O was added. The solution was stirred for a further 30 min after which the mixture was cooled to RT and concentrated *in vacuo*. The resulting residue was then purified *via* column chromatography over silica gel (petroleum ether:EtOAc, 100:0 to 76:24) giving alcohol **32** as a colorless waxy solid (167 mg, 68%):  $R_f$  0.23 (petroleum ether:EtOAc, 8:2);  $[\alpha]_D^{25} -3.3$  (c 1.0,

CHCl<sub>3</sub>);  $\nu_{\max}$  (thin film)/cm<sup>-1</sup> 3313, 2981, 2925, 2854, 1742, 1463, 1381, 1251, 1165, 955; <sup>1</sup>H NMR (600 MHz, CDCl<sub>3</sub>)  $\delta_{\text{H}}$  5.09 (1 H, p, *J* 4.9, H-2), 4.32 (1 H, dd, *J* 12.0, 4.5, H-1'), 4.23 (1 H, dd, *J* 12.0, 5.6, H-1''), 3.80–3.70 (2 H, m, H-3), 2.32 (2 H, t, *J* 7.5, H-5), 2.20–2.12 (4 H, m, H-33 and H-21), 1.93 (1 H, t, *J* 2.6, H-35), 1.82–1.71 (2 H, m, H-22), 1.65–1.58 (2 H, m, H-6), 1.52 (2 H, p, *J* 7.2, H-32), 1.42–1.34 (4 H, m, H-30 and H-31), 1.34–1.19 (34 H, m, H-28 to H-24 and H-18 to H-7), 1.12–1.04 (2 H, m, H-29), 0.88 (3 H, t, *J* 7.0, H-19); <sup>13</sup>C NMR (151 MHz, CDCl<sub>3</sub>)  $\delta_{\text{C}}$  173.9 (C-4), 172.0 (C-20), 84.9 (C-34), 72.9 (C-2), 68.2 (C-35), 62.0 (C-1), 61.6 (C-3), 34.2 (C-5), 32.8 (C-31), 32.1 (C-17), 29.85, 29.83, 29.81, 29.77, 29.62, 29.55, 29.54, 29.51, 29.49, 29.41, 29.29, 29.27, 29.21, 29.20 (C-24 to C-30, C-7 to C-16), 28.9 (C-21), 28.6 (C-32), 28.4 (C-23), 28.3 (C-22), 25.0 (C-6), 23.9 (C-29), 22.8 (C-18), 18.5 (C-33), 14.3 (C-19); LRMS *m/z* (ESI<sup>-</sup>) 635.5 (M+FA-H, 100%); HRMS *m/z* (ESI<sup>+</sup>) found 613.4553 [M+Na]<sup>+</sup> (C<sub>35</sub>H<sub>62</sub>O<sub>5</sub>N<sub>2</sub>Na) requires 613.4551 [M+Na]<sup>+</sup>.

*Method 2:* Silane **31** (200 mg, 0.284 mmol, 1.0 eq) was dissolved in a mixture of anhydrous MeOH (2.1 mL) and anhydrous CH<sub>2</sub>Cl<sub>2</sub> (0.7 mL). A substoichiometric amount of FeCl<sub>3</sub> (2 mg, 0.01 mmol, 0.05 eq) was added and the reaction mixture, which was stirred for 3 h until TLC analysis confirmed complete consumption of the starting material. The solution was diluted with Et<sub>2</sub>O (20 mL), washed with H<sub>2</sub>O (20 mL), and the aqueous component was extracted further with Et<sub>2</sub>O (3 × 20 mL). The combined Et<sub>2</sub>O extracts were then washed with brine, dried over Na<sub>2</sub>SO<sub>4</sub>, filtered, and concentrated *in vacuo*, resulting in alcohol **32** (156 mg, 93%, >95% e.e.) as a colorless waxy solid requiring no further purification. No transesterification by-product was observed by <sup>1</sup>H NMR, suggesting the reaction did not affect the enantiopurity of the product.  $[\alpha]_{\text{D}}^{25}$  -3.5 (c 1.0, CHCl<sub>3</sub>); <sup>1</sup>H NMR (600 MHz, CDCl<sub>3</sub>)  $\delta_{\text{H}}$  5.09 (1 H, p, *J* 5.0, H-2), 4.32 (1 H, dd, *J* 12.0, 4.5, H-1'), 4.23 (1 H, dd, *J* 12.0, 5.6, H-1''), 3.80–3.70 (2 H, m, H-3), 2.32 (2 H, t, *J* 7.6, H-5), 2.17 (3 H, td, *J* 7.1, 2.5), H-33), 2.15 (2 H, t, *J* 7.4, H-21), 1.93 (1 H, t, *J* 2.6, H-35), 1.82–1.71 (2 H, m, H-22), 1.61 (2 H, p, *J* 7.4, H-6), 1.52 (2 H, p, *J* 7.2, H-32), 1.41–1.35 (4 H, m, H-30, H-31), 1.32–1.19 (34 H, m,

H-7 to H-18 and H-24 to H-28), 1.10–1.03 (2 H, m, H-29), 0.88 (3 H, t,  $J$  7.0, H-19);  $^{13}\text{C}$  NMR (151 MHz,  $\text{CDCl}_3$ )  $\delta_{\text{C}}$  173.9 (C-4), 172.0 (C-20), 84.9 (C-34), 72.9 (C-2), 68.2 (C-35), 62.0 (C-1), 61.6 (C-3), 34.2 (C-5), 32.8 (C-31), 32.1 (C-17), 29.85, 29.83, 29.81, 29.77, 29.62, 29.55, 29.54, 29.51, 29.49, 29.41, 29.29, 29.27, 29.21, 29.20 (C-30 to C-24, C-16 to C-7), 28.9 (C-21), 28.6 (C-32), 28.4 (C-23), 28.3 (C-22), 25.0 (C-6), 23.9 (C-29), 22.8 (C-18), 18.5 (C-33), 14.3 (C-19). All other characterization data matched those reported above. The e.e. of (–)-**32** was calculated by  $^1\text{H}$  NMR using a chiral auxiliary (see **Figure S3**).

**(2R)-3-(((Benzyloxy)(diisopropylamino)phosphaneyloxy)-2-((3-(3-(dodec-11-yn-1-yl)-3H-diazirin-3-yl)propanoyloxy)propyl) palmitate **34****

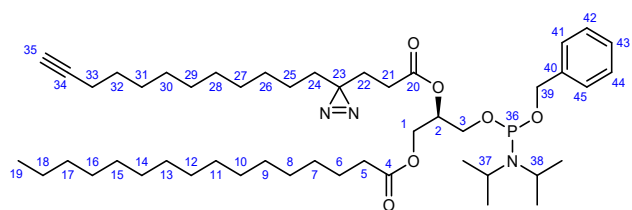

To a solution of benzyloxy-bis(*N,N*-diisopropylamino) phosphine **33** (172 mg, 0.507 mmol, 3.0 eq) in anhydrous

dichloromethane (1 mL) was added 1*H*-tetrazole (1.13 mL, 0.507 mmol, 3.0 eq, 0.45 M in MeCN). The solution was stirred for 15 min, after which alcohol **32** (100 mg, 0.169 mmol, 1.0 eq) was added as a single batch. The reaction mixture was stirred at RT for 18 h, diluted with  $\text{CH}_2\text{Cl}_2$  (10 mL), and then quenched by the addition of saturated aqueous  $\text{NaHCO}_3$  (3 mL). The organic phase was extracted with  $\text{CH}_2\text{Cl}_2$  (3  $\times$  3 mL). The combined organic layers were washed with brine (10 mL), dried over  $\text{Na}_2\text{SO}_4$ , filtered, and then concentrated *in vacuo*. The residue obtained was purified by column chromatography over silica gel (hexane:EtOAc:Et<sub>3</sub>N, 90:5:5) to give phosphoramidite **34** (135 mg, 96%) as a colorless viscous oil, containing a mixture of two diastereoisomers. Due to its unstable nature, this phosphoramidite was used without further characterization:  $R_f$  0.73 (petroleum ether:EtOAc:Et<sub>3</sub>N, 90:5:5);  $[\alpha]_D^{25} +5.3$  (c 1.0,  $\text{CHCl}_3$ );  $\nu_{\text{max}}$  (thin film)/ $\text{cm}^{-1}$  3312, 2926, 2854, 2118, 1743, 1497, 1364, 1184, 976;  $^1\text{H}$  NMR (400 MHz,  $\text{CDCl}_3$ )  $\delta_{\text{H}}$  7.39–7.26 (10 H, m, H-41 to H-45 Diast. A and B), 5.21–5.14 (2 H, m, H-2 Diast. A and B), 4.82–4.61 (4 H, m, H-1 Diast. A and B), 4.36 (1 H, dd,  $J$  8.5, 3.7, H-3' Diast. A), 4.32 (1 H, dd,  $J$  8.5,

3.7, H-3' Diast. B), 4.21–4.12 (2 H, m, H-3'' Diast. A and B), 3.83–3.54 (8 H, m, H-37, H-38, H-39. Diast A and B), 2.29 (4 H, t,  $J$  7.6, H-5 Diast. A and B), 2.18 (2 H, td,  $J$  7.2, 2.7, H-33 Diast. A and B), 2.12–2.06 (2 H, m, H-21 Diast. A and B), 1.93 (2 H, t,  $J$  2.7, H-35), 1.73–1.68 (4 H, m, H-22 Diast. A and B), 1.65–1.56 (4 H, m, H-6 Diast. A and B), 1.56–1.47 (4 H, m, H-32 Diast. A and B), 1.43–1.15 (100H, m, H-31, H-30, H-28 to H-24 and H-18 to H-7, 2 × C(37)CH<sub>3</sub>, 2 × C(38)CH<sub>3</sub>, Diast. A and B), 1.10–1.00 (4 H, m, H-29 Diast. A and B), 0.88 (6 H, t,  $J$  6.6, H-19 Diast. A and B); <sup>31</sup>P NMR (162 MHz, CDCl<sub>3</sub>) δ<sub>P</sub> 148.9 (P-36 Diast. A), 148.7 (P-36 Diast. B); HRMS  $m/z$  (ESI<sup>+</sup>) found 828.6007 [M+H]<sup>+</sup> (C<sub>48</sub>H<sub>83</sub>O<sub>6</sub>N<sub>3</sub>P) requires 828.6014 [M+H]<sup>+</sup>.

**(+)-(2R)-3-(((Benzyloxy)(((3aR,4R,5S,6R,7S,7aR)-4,6-bis((4-methoxybenzyl)oxy)-5-((3-oxido-1,5-dihydrobenzo[e][1,3,2]dioxaphosphepin-3-yl)oxy)hexahydrospiro[benzo[d][1,3]dioxole-2,1'-cyclopentan]-7-yl)oxy)phosphoryl)oxy)-2-(((3-(3-(dodec-11-yn-1-yl)-3H-diazirin-3-yl)propanoyl)oxy)propyl palmitate (+)-35**

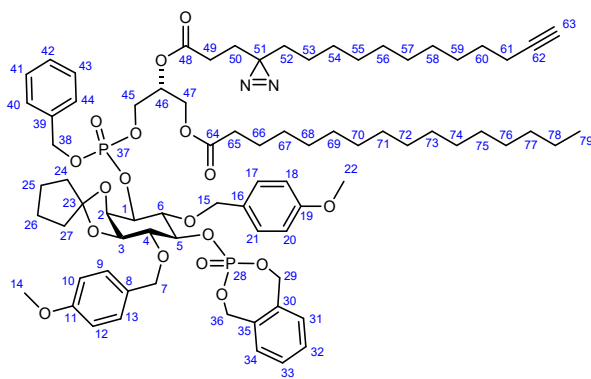

To a solution of phosphoramidite **34** (150 mg, 0.181 mmol, 1.0 eq) in anhydrous CH<sub>2</sub>Cl<sub>2</sub> (1.8 mL) was added 1*H*-tetrazole (402 μL, 0.181 mmol, 1.0 eq, 0.45 M in MeCN). After 10 min, inositol **(+)-19** (120 mg, 0.181 mmol, 1.0 eq) was added as a single batch to the cloudy reaction mixture, and the mixture was stirred at

RT for a further 18 h. The reaction mixture was then cooled to –78 °C and *m*CPBA (41 mg, 0.181 mmol, 1.0 eq, 77%) was added in one portion. The reaction mixture was stirred for 1 h, warmed to RT, stirred for a further 3 h, and then quenched by the addition of an aqueous solution of Na<sub>2</sub>S<sub>2</sub>O<sub>3</sub> (10% w/v, 5 mL). After stirring for 15 min, the aqueous phase was extracted with CH<sub>2</sub>Cl<sub>2</sub> (4 × 5 mL) and the combined organic layers were washed with brine (15 mL), dried over Na<sub>2</sub>SO<sub>4</sub>, filtered, and then concentrated *in vacuo*. Purification by column chromatography over silica gel (petroleum ether:EtOAc, 10:0, 5:5) yielded protected PI(5)P **(+)-35** (147 mg, 57%) as a colorless, gummy oil containing a mixture of two diastereoisomers: *R<sub>f</sub>* 0.51 (petroleum

ether:EtOAc, 5:5);  $[\alpha]_D^{25} +2.4$  (c 0.7, CHCl<sub>3</sub>);  $\nu_{\max}$ (thin film)/cm<sup>-1</sup> 2927, 2854, 2360, 2341, 1744, 1515, 1250, 1015, 763; <sup>1</sup>H NMR (600 MHz, CDCl<sub>3</sub>)  $\delta_H$  7.38 – 6.75 (34 H, m, H-9, H-10, H-12, H-13, H-17, H-18, H-20, H-21, H-31 to H-34, H-40 to H-44 Diast. A and B), 5.19–4.98 (13 H, m, H-38 Diast. A, H-38' Diast. B, H-29, H-36, H-46 Diast. A and B), 4.94 (1 H, dd, *J* 11.8, 7.6, H-38'' Diast. B), 4.78 (2 H, dd, *J* 10.5, 4.1, H-15' Diast. A and B), 4.73 (2 H, dd, *J* 11.3, 4.0, H-7' Diast. A and B), 4.70–4.65 (3 H, m, H-7'' Diast. A, H-1 Diast. A and B), 4.66–4.59 (5 H, m, H-7'' Diast. B, H-15'', H-5 Diast. A and B), 4.48 (2 H, dd, *J* 6.4, 3.7, H-2 Diast. A and B), 4.26 (1 H, dd, *J* 12.1, 4.0, H-47' Diast. A), 4.19 (1 H, dd, *J* 6.1, 6.1, H-3 Diast. A), 4.18 (1 H, dd, *J* 6.1, 6.1, H-3 Diast. B), 4.17–4.12 (2 H, m, H-45', H-47'' Diast. A), 4.12–3.97 (6 H, m, H-6, H-45'' Diast. A, H-45', H-45'', H-47' Diast. B), 3.94–3.85 (3 H, m, H-47'' Diast. B, H-4 Diast. A and B), 3.78 (3 H, s, PMB -OCH<sub>3</sub> Diast. A), 3.77 (6 H, s, PMB -OCH<sub>3</sub> Diast. A and B), 3.75 (3 H, s, PMB -OCH<sub>3</sub> Diast. B.), 2.27 (2 H, t, *J* 7.6, H-65 Diast. A), 2.25 (2 H, t, *J* 7.6, H-65 Diast. B), 2.17 (4 H, td, *J* 7.2, 2.6, H-61 Diast. A and B), 2.07 (2 H, td, *J* 7.9, 3.1, H-49 Diast. A), 2.02–1.98 (2 H, m, H-49 Diast. B), 1.98–1.85 (6 H, m, H-63, H-24', H-27' Diast. A and B), 1.74–1.61 (16 H, m, H-24'', H-27'', H-25, H-26, H-50 Diast. A and B), 1.59–1.54 (4 H, m, H-66 Diast. A and B), 1.51 (4 H, p, *J* 7.2, H-60 Diast. A and B), 1.41–1.15 (76 H, m, H-52 to H-57, H-59, H-67 to H-78 Diast. A and B), 1.07–0.98 (4 H, m, H-58 Diast. A and B), 0.88 (6 H, t, *J* 7.0, H-79 Diast. A and B); <sup>31</sup>P NMR (243 MHz, CDCl<sub>3</sub>)  $\delta_P$  -0.64 (P-28 Diast. A), -0.67 (P-28 Diast. B), -1.85 (P-37 Diast. A), -1.97 (P-37 Diast. B); <sup>13</sup>C NMR (151 MHz, CDCl<sub>3</sub>)  $\delta_C$  173.33, 173.27 (C-64 Diast. A and B), 171.53, 171.48 (C-48 Diast. A and B), 159.38, 159.37, 159.32 (C-11, C-19 Diast. A and B), 135.9 – 135.7 (m, C-39 Diast. A and B), 135.48, 135.46, 135.39 (C-8, C-16, C-30, C-35), 130.1 (d, *J* 2.7), 129.84 (d, *J* 2.2), 129.76, 129.69, 129.11, 129.10, 129.07, 128.89, 128.87, 128.84, 128.83, 128.73, 128.72, 128.67, 128.60, 128.0, 127.8 (Aromatic C-10, C-12, C-18, C-20, C-31, C-32, C-33, C-34, C-40, C-41, C-42, C-43, C-44 Diast. A and B), 120.1 (C-23 Diast. A and B), 113.80, 113.79, 113.77 (C-9, C-13, C-17, C-21 Diast. A and B), 84.9 (C-62 Diast. A and B), 80.50 (C-5 Diast. A), 80.47 (C-5 Diast. B), 78.62

(d, *J* 2.7, C-4, Diast. A), 78.56 (d, *J* 2.7, C-4 Diast. B), 78.2–78.0 (m, C-6 Diast. A), 78.0–77.8 (m, C-6 Diast. B), 77.2 (C-3 Diast. A and B by HSQC), 75.35 (C-1 Diast. A), 75.31 (C-1 Diast. B), 74.24 (C-2 Diast. A), 74.17 (C-2 Diast. B), 74.0 (d, *J* 2.7, C-15 Diast. A), 72.8 (d, *J* 4.4, C-15 Diast. B), 70.04 (d, *J* 3.3, C-46 Diast. A), 69.98 (d, *J* 3.8, C-46 Diast. B), 69.6 (t, *J* 5.7, C-38 Diast. A and B), 68.5–68.4 (m, C-29 and C-36 Diast. A and B), 68.2 (C-63 Diast. A and B), 65.7 (d, *J* 5.4, C-45 Diast. A), 65.4 (d, *J* 5.5, C-45 Diast. B), 61.7 (C-47 Diast. A), 61.6 (C-47 Diast. B), 55.39, 55.36, 55.35 (C-14, C-22 Diast. A and B), 36.57, 36.56, 36.39, 36.36 (C-24, C-27 Diast. A and B), 34.11 (C-65 Diast. A), 34.07 (C-65 Diast. B), 32.81, 32.77, 32.1, 29.85, 29.82, 29.82, 29.81, 29.79, 29.65, 29.64, 29.56, 29.51, 29.4, 29.31, 29.29, 29.2 (C-52 to C-57, C-67 to C-76 Diast. A and B), 28.9 (C-59 Diast. A and B), 28.62 (C-60 Diast. A and B), 28.57 (C-49 Diast. A), 28.54 (C-49 Diast. B), 28.21 (C-50 Diast. A), 28.20 (C-50 Diast. B), 28.17 (C-51 Diast. A and B), 24.97 (C-66 Diast. A), 24.95 (C-66 Diast. B), 24.03 (C-58 Diast. A), 24.00 (C-58 Diast. B), 23.9 (C-59 Diast. A and B), 23.4 (C-25 or C-26 Diast. A and B), 22.8 (C-77 or C-78 Diast. A and B), 18.5 (C-61 Diast. A and B), 14.3 (C-79 Diast. A and B); HRMS *m/z* (ESI<sup>+</sup>) found 1411.7101 [M+H]<sup>+</sup> (C<sub>77</sub>H<sub>109</sub>O<sub>18</sub>N<sub>2</sub>P<sub>2</sub> requires 1411.7145 [M+H]<sup>+</sup>). NP-HPLC *t<sub>R</sub>* = 11.28 min (Diast. A), 12.20 (Diast. B.), 99.55% @ 280 nm, 98.74% @ 254 nm.

**Ammonium (1*S*,2*R*,3*R*,4*R*,5*R*,6*R*)-3-(((*R*)-2-((3-(3-(dodec-11-yn-1-yl)-3*H*-diazirin-3-yl)propanoyl)oxy)-3-(palmitoyloxy)propoxy)oxidophosphoryl)oxy)-2,4,5,6-tetrahydroxycyclohexyl phosphate, PI(5)P-DIAZ, 9**

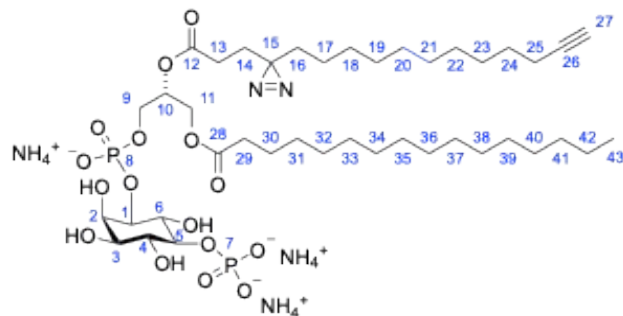

To a solution of protected PI(5)P (+)-**35** (15 mg, 0.011 mmol, 1.0 eq) in anhydrous toluene (1 mL) was added TMSBr (44  $\mu$ L, 0.33 mmol, 30 eq). The solution was stirred at RT for 2 h after which TLC confirmed complete

consumption of the starting material. The reaction mixture was cooled to 0 °C and concentrated *in vacuo*. The resulting residue was redissolved in anhydrous toluene (1 mL) and concentrated again *in vacuo*. This was repeated three times to remove residual TMSBr, being careful to keep the flask under inert and dry conditions. The residue was then dissolved in MeOH (1 mL), stirred at 0 °C for 1 h and was then concentrated *in vacuo* (2–3 mbar) at 0 °C to avoid bumping. The residue obtained was dissolved in the minimal amount of MeOH:CH<sub>2</sub>Cl<sub>2</sub> (1:1 v/v) and purified by column chromatography over silica gel (CHCl<sub>3</sub>:MeOH:2.2 M NH<sub>4</sub>OH, 9:7:2). The combined fractions were partially concentrated *in vacuo* at 0 °C, then milli Q H<sub>2</sub>O (30 mL) was added. Lyophilization yielded PI(5)P DIAZ **9** (6 mg, 56%) as a colorless, fluffy powder. The compound was stored at –80 °C as the assumed *tris*-ammonium salt: *R<sub>f</sub>* 0.53 (CHCl<sub>3</sub>:MeOH:2.2 M NH<sub>4</sub>OH, 9:7:2);  $\nu_{\max}$  (solid)/cm<sup>-1</sup> 3317, 2918, 2850, 1742, 1727, 1199, 1048, 947, 727; <sup>1</sup>H NMR (600 MHz, MeOD:CDCl<sub>3</sub>:D<sub>2</sub>O, 4:3:1)  $\delta_{\text{H}}$  5.28–5.22 (1 H, m, H-10), 4.42–4.40 (1 H, m, H-11' by HSQC), 4.20 (1 H, dd, *J* 12.3, 7.4, H-11''), 4.17 (1 H, dd, *J* 2.7, 2.7, H-2), 4.07–4.00 (2 H, m, H-9), 3.98–3.93 (1 H, m, H-1), 3.90–3.81 (2 H, m, H-5, H-6), 3.78 (1 H, dd, *J* 9.3, 9.3 H-4), 3.50 (1 H, dd, *J* 9.7, 2.8, H-3), 2.33 (2 H, t, *J* 7.6, H-29), 2.23–2.09 (4 H, m, H-13, H-25), 2.05 (1 H, t, *J* 2.6, H-27), 1.80–1.73 (1 H, m, H-14'), 1.71–1.64 (1 H, m, H-14''), 1.62–1.55 (2 H, m, H-30), 1.50 (2 H, p, *J* 7.2, H-24), 1.42–1.35 (4 H, m, H-21, H-23), 1.35–1.18 (34 H, m, H-16 to H-20, H-31 to H-42), 1.09–1.01 (2 H, m, H-22), 0.87 (3 H, t, *J* 7.0, H-43); <sup>31</sup>P NMR (243 MHz, MeOD:CDCl<sub>3</sub>:D<sub>2</sub>O, 4:3:1)  $\delta_{\text{P}}$  1.6 (P-7), –0.2 (P-8); <sup>13</sup>C NMR (151 MHz, MeOD:CDCl<sub>3</sub>:D<sub>2</sub>O, 4:3:1)  $\delta_{\text{C}}$  175.3 (C-28), 173.3 (C-12), 85.4 (C-26), 80.2 (d, *J* 5.4, C-5), 77.0 (d, *J* 6.0, C-1), 72.8 (d, *J* 2.2, C-4), 72.0 (C-2), 71.92 (C-6), 71.87 (C-10), 71.7 (C-3), 69.0 (C-27), 64.4 (d, *J* 4.4, C-9), 63.6 (C-11), 34.8 (C-29), 33.3 (C-23), 32.6, 30.37, 30.32, 30.2, 30.13, 30.10, 30.0, 29.89, 29.88, 29.76, 29.4 (C-16 to C-21, C-31 to C-41), 29.2 (C-13, C-24), 28.9 (C-15), 28.8 (C-14), 25.6 (C-30), 24.5 (C-22), 23.3 (C-42), 18.9 (C-25), 14.5 (C-43); LRMS *m/z* (ESI<sup>-</sup>) 911.3 [M–H]<sup>-</sup>, 455.4 [M–H]<sup>-</sup>; HRMS *m/z* (ESI<sup>-</sup>) found 911.4425 [M–H]<sup>-</sup> (C<sub>41</sub>H<sub>73</sub>O<sub>16</sub>N<sub>2</sub>P<sub>2</sub> requires 911.441 [M–H]<sup>-</sup>).

\* $[\alpha]_D$  measurements could not be reliably obtained due to micelle formation.

#### 4,6-Di-O-benzyl-*myo*-inositol 1,3,5-orthoformate **S1**

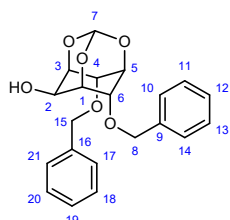

LiH (998 mg, 126 mmol, 4.0 eq) was gradually added to a solution of *myo*-inositol-1,3,5-orthoformate **11** (6.00 g, 31.5 mmol, 1.0 eq) in anhydrous DMF (90 mL), and the resulting solution was stirred at RT for 30 min. Benzyl bromide (8.58 mL, 72.2 mmol, 2.3 eq) was then added dropwise and the solution was stirred for a further 72 h. The reaction was quenched with H<sub>2</sub>O (90 mL), and the volatile components were removed *in vacuo*. Residual DMF was removed using toluene as an azeotrope. The resultant yellow paste was dissolved in EtOAc (250 mL) and washed with H<sub>2</sub>O (2 × 100 mL). The organic layer was dried over Na<sub>2</sub>SO<sub>4</sub>, filtered, and concentrated *in vacuo*. The remaining residue was dissolved in the minimum volume of hot EtOAc and then cooled to –30 °C to yield 4,6-di-O-benzyl-*myo*-inositol 1,3,5-orthoformate **S1** (7.29 g, 63%) as a colorless solid: *R*<sub>f</sub> 0.48 (petroleum ether:EtOAc, 1:1); m.p. 117–119 °C (EtOAc) [lit.<sup>5</sup> 123–124 °C (EtOAc)]; <sup>1</sup>H NMR (400 MHz; CDCl<sub>3</sub>) δ<sub>H</sub> 7.31–7.24 (10H, m, H-10 to H-14 and H-17 to H-21), 5.47 (1H, d, *J* 1.0, H-7), 4.67 (2H, d, *J* 11.6, H-8 and H-15), 4.59 (2H, d, *J* 11.6, H-8' and H-15'), 4.48–4.45 (1H, m, H-2), 4.37 (2H, dd, *J* 3.8, 3.8, H-4 and H-6), 4.25–4.18 (3H, m, H-1, H-3 and H-5), 3.00 (1H, d, *J* 11.6, C(2)OH); LRMS *m/z* (ESI<sup>+</sup>) 370.75 ([M+H]<sup>+</sup> 100%). These data are in good agreement with the literature values.<sup>5,11</sup>

#### 4,6-Di-O-benzyl-*myo*-inositol **S2**

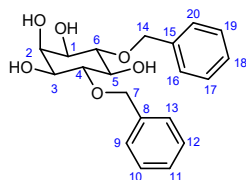

The protected orthoformate **S1** (3.00 g, 8.10 mmol, 1.0 eq) was dissolved in MeOH (8.1 mL) and PTSA·H<sub>2</sub>O (1.54 g, 8.10 mmol, 1.0 eq) was added. The solution was heated to 50 °C and stirred for 50 min. The reaction was then

quenched with Et<sub>3</sub>N (1.12 mL, 8.10 mmol, 1.0 eq) and then concentrated *in vacuo*. The residue was purified by column chromatography over silica gel (EtOAc) to yield 4,6-di-*O*-benzyl-*myo*-inositol **S2** as a colorless, fluffy solid (2.82 g, 97%): *R*<sub>f</sub> 0.40 (EtOAc); m.p. 130–132 °C (EtOAc), [lit.<sup>12</sup> 138.5–139 °C (hexane:CH<sub>2</sub>Cl<sub>2</sub>)]; <sup>1</sup>H NMR (400 MHz; CDCl<sub>3</sub>) δ<sub>H</sub> 7.41–7.29 (10H, m, H-9 to H-13 and H-16 to H-20), 4.91 (2H, d, *J* 11.4, H-7 and H-14), 4.85 (2H, d, *J* 11.4, H-7' and H-14'), 4.15 (1H, dd, *J* 2.9, 2.9, H-5), 3.67 (2H, dd, *J* 9.3, 9.3, H-4 and H-6), 3.59–3.52 (3H, m, H-1, H-2 and H-3), 2.20 (4H, br s, C(1)OH, C(2)OH, C(3)OH and C(5)OH); LRMS *m/z* (ESI<sup>+</sup>) 383.0 ([M+Na]<sup>+</sup>, 100%). These data are in good agreement with the literature values.<sup>5</sup>

### (-)-1*D*-1-*O*-Acetyl-4,6-di-*O*-benzyl-*myo*-inositol (-)-**S3**

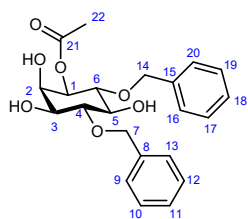

The immobilized Lipozyme® TL-IM (3.00 g) was added to a solution of 4,6-di-*O*-benzyl-*myo*-inositol **S2** (1.00 g, 2.77 mmol, 1.0 eq) in vinyl acetate (250 mL) and hexane (250 mL). After stirring at 45 °C for 18 h the reaction mixture was filtered through a pad of Celite®, washed with hexane (3 × 20 mL) and the combined filtrates were concentrated *in vacuo* to give (-)-**S3** (1.06 g, 95%, >99% e.e. (other enantiomer not observed) as a colorless solid. The product was deemed to be pure enough, requiring no further purification: *R*<sub>f</sub> 0.78 (EtOAc); [α]<sub>D</sub><sup>25</sup> -34.4 (c 1.0, MeOH) [lit.<sup>5</sup> [α]<sub>D</sub><sup>25</sup> -39.3 (c 1.0, MeOH)]; m.p. 92–95 °C (EtOAc) [lit. 96–97 °C (EtOAc)]; <sup>1</sup>H NMR (400 MHz; CDCl<sub>3</sub>) δ<sub>H</sub> 7.40–7.27 (10H, m, H-16 to H-20 and H-9 to H-13), 4.98 (1H, d, *J* 11.4, H-7), 4.86 (1H, dd, *J* 10.2, 2.8, H-1), 4.80 (1H, d, *J* 11.6, H-14), 4.75 (1H, d, *J* 11.6, H-7'), 4.74 (1H, d, *J* 11.6, H-14'), 4.19 (1H, dd, *J* 2.8, 2.8, H-2), 3.92 (1H, dd, *J* 10.2, 9.1, H-6), 3.70 (1H, dd, *J* 9.3, 9.3, H-4), 3.65–3.55 (2H, m, H-5 and H-3), 2.64 (4H, br s, C(5)OH, C(3)OH, C(2)OH), 2.08 (3H, s, H-22); *m/z* LRMS (ESI<sup>+</sup>) found 425.2 ([M+Na]<sup>+</sup>, 100%). These data are in good agreement with the literature values.<sup>5</sup>

### (-)-1D-1-O-Acetyl-2,3-O-cyclopentylidene-4,6-di-O-benzyl-*myo*-inositol (-)-S4

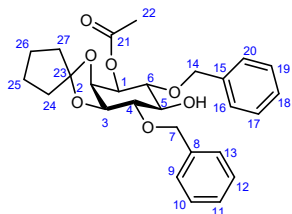

To a clear solution of (-)-1D-1-O-acetyl-4,6-di-O-benzyl-*myo*-inositol **S3** (800 mg, 1.99 mmol, 1.0 eq) and 1,1-dimethoxycyclopentane (4.55 mL, 33.2 mmol, 17 eq) in CH<sub>2</sub>Cl<sub>2</sub> (5.0 mL) was added PTSA·H<sub>2</sub>O (30 mg, 0.16 mmol, 0.080 eq). The resulting solution was stirred at RT for 18 h.

The solution was then quenched with Et<sub>3</sub>N (0.020 mL, 0.16 mmol, 0.08 eq) and concentrated *in vacuo*. The residue obtained was purified by column chromatography over silica gel (petroleum ether:EtOAc, 9:1 to 5:5) to give (-)-**S4** (899 mg, 96%) as a pale yellow oil: *R*<sub>f</sub> 0.59 (petroleum ether:EtOAc, 9:1 to 5:5);  $[\alpha]_D^{25}$  -30.1 (c 1.0, CHCl<sub>3</sub>), [lit.<sup>5</sup>  $[\alpha]_D^{25}$  23.2 (c 1.0, CHCl<sub>3</sub>)]; <sup>1</sup>H NMR (400 MHz; CDCl<sub>3</sub>) δ<sub>H</sub> 7.41–7.25 (10H, m, H-9 to H-13 and H-16 to H-20), 5.18 (1H, dd, *J* 8.4, 3.7, H-1), 4.92 (1H, d, *J* 11.6, H-7), 4.82 (1H, d, *J* 11.6, H-14), 4.75 (1H, d, *J* 11.6, H-14'), 4.71 (1H, d, *J* 11.6, H-7'), 4.33 (1H, dd, *J* 5.6, 3.7, H-2), 4.19–4.15 (1H, m, H-3), 3.84–3.76 (1H, m, H-6), 3.68–3.59 (2H, m, H-5 and H-4), 2.65 (1H, s, C(5)OH), 2.08 (3H, s, H-22), 1.99–1.83 (2H, m, H-24', H-27'), 1.79–1.62 (6H, m, H-25, H-26 and H-24'' and H-27''). These data are in good agreement with the literature values.<sup>5</sup>

### (-)-1D-1-O-Acetate-2,3-O-cyclopentylidene-4,6-di-O-benzyl-5-O-(2-oxo-5,6-benzo-1,3,2-dioxaphosphep-2-yl)-*myo*-inositol (-)-S5

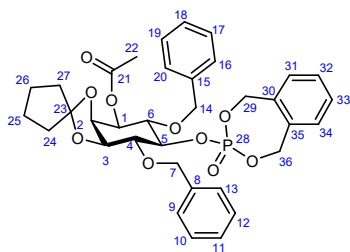

To a solution of alcohol (-)-**S4** (400 mg, 0.854 mmol, 1.0 eq) and *N,N*-diethyl-1,5-dihydrobenzo[*e*][1,3,2]dioxaphosphepin-3-amine **17** (613 mg, 2.56 mmol, 3.0 eq) in CH<sub>2</sub>Cl<sub>2</sub> (15 mL) was added 1*H*-tetrazole (5.70 mL, 2.56 mmol, 3.0 eq, 0.45 M in MeCN). After stirring at RT for 1 h, the cloudy reaction mixture was cooled to -78

°C and *m*CPBA (574 mg, 2.56 mmol, 3.0 eq, 77%) was added in a single portion. The reaction mixture was gradually warmed to RT over 20 min, stirred for 1 h and then finally quenched with

an aqueous solution of Na<sub>2</sub>S<sub>2</sub>O<sub>3</sub> (10% w/v, 10 mL). The aqueous layer was extracted with CH<sub>2</sub>Cl<sub>2</sub> (4 × 10 mL) and the combined organic layers were washed with an aqueous solution of Na<sub>2</sub>S<sub>2</sub>O<sub>3</sub> (10% w/v, 3 × 10 mL), brine (30 mL) and then dried over Na<sub>2</sub>SO<sub>4</sub>, filtered, and concentrated *in vacuo*. Purification by column chromatography over silica gel (petroleum ether:EtOAc, 9:1 to 5:5) afforded **(-)-S5** (512 mg, 93%) as an amorphous, colorless foam: *R<sub>f</sub>* 0.13 (petroleum ether:Et<sub>2</sub>O, 4:6);  $[\alpha]_D^{25}$  -5.9 (c 1.0, CHCl<sub>3</sub>), [lit.<sup>5</sup>  $[\alpha]_D^{25}$  -8.1 (c 1.0, CHCl<sub>3</sub>)]; <sup>1</sup>H NMR (400 MHz; CDCl<sub>3</sub>) δ<sub>H</sub> 7.44–7.39 (2H, m, H-9 and H-13), 7.37–7.24 (10H, m, H-10 to H-12, H-16 to H-20, H-32 and H-33), 7.20–7.13 (2H, m, H-31 and H-34), 5.25 (1H, dd, *J* 8.7, 3.6, H-1), 5.22–4.93 (4H, m, H-29 and H-36), 4.86 (1H, d *J* 11.3, H-14), 4.85 (1H, d *J* 11.6, H-7), 4.76 (1H, dd *J* 11.6, H-7'), 4.69 (1H, dd, *J* 11.3, H-14'), 4.67–4.60 (1H, m, H-5), 4.39 (1H, dd, *J* 6.2, 3.6, H-2), 4.23 (1H, dd, *J* 6.2, 6.2, H-3), 4.04 (1H, dd, *J* 8.7, 7.0, H-6), 3.89 (1H, dd, *J* 7.9, 6.0, H-4), 2.05 (3H, s, H-22), 1.99–1.83 (2H, m, H-24 and H-27), 1.75–1.61 (6H, m, H-24', H-25, H-26 and H-27'); <sup>31</sup>P NMR (162 MHz, CDCl<sub>3</sub>) δ<sub>P</sub> -0.24; LRMS *m/z* (ESI<sup>+</sup>) 650.7 ([M+H]<sup>+</sup>, 100%). These data are in good agreement with the literature values.<sup>5</sup>

**(+)-1D-2,3-O-Cyclopentylidene-4,6-di-O-benzyl-5-O-(2-oxo-5,6-benzo-1,3,2-dioxosphep-2-yl)-myo-inositol (+)-S6**

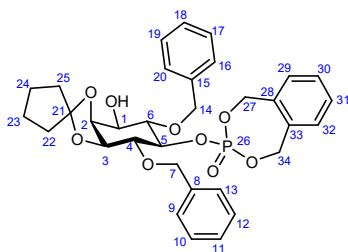

To a solution of acetate **(-)-S5** (660 mg, 1.08 mmol, 1.0 eq) in MeOH (92 mL) was added ground K<sub>2</sub>CO<sub>3</sub> (298 mg, 2.16 mmol, 2.0 eq). The reaction mixture was stirred at RT for 1 h. The solvent was then partially removed *in vacuo* at RT and H<sub>2</sub>O (30 mL) was added to the resulting residue. The aqueous layer was extracted with EtOAc (4 × 10 mL) and the combined organic layers were washed with brine (40 mL), and then dried over Na<sub>2</sub>SO<sub>4</sub>, filtered, and concentrated *in vacuo*. Purification using column chromatography over silica gel (petroleum ether:EtOAc, 9:1 to 5:5) afforded alcohol **(+)-S6** (474 mg, 72%) as an amorphous

solid:  $R_f$  0.59 (petroleum ether:EtOAc, 2:8);  $[\alpha]_D^{25} +1.6$  (c 1.0, CHCl<sub>3</sub>), [lit.<sup>5</sup>  $[\alpha]_D^{25} +3.1$  (c 2.0, CHCl<sub>3</sub>)]; <sup>1</sup>H NMR (400 MHz, CD<sub>2</sub>Cl<sub>2</sub>)  $\delta_H$  7.62–7.00 (14H, m, H-9 to H-13, H-16 to H-20, H-29 to H-32), 5.18–5.07 (3H, m, H-27 or H-34, H-27' and H-34'), 5.00 (1H, dd,  $J$  17.8, 13.7, H-27 or H-34), 4.88 (1H, d,  $J$  11.1, H-7 or H-14), 4.87 (1H, d,  $J$  11.4, H-7 or H-14), 4.73 (2H, d,  $J$  11.4, H-7' or H-14'), 4.60–4.50 (1H, m, H-5), 4.33 (1H, dd,  $J$  6.5, 3.7, H-2), 4.23 (1H, dd,  $J$  6.5, 6.5, H-3), 4.04–3.89 (3H, m, H-1, H-5, H-6), 2.55 (1H, d,  $J$  4.1, C(1)OH), 2.00–1.91 (2H, m, H-22 or H-25), 1.82–1.63 (6H, m, H-23, H-24 and H-22 or H-25). <sup>31</sup>P NMR (162 MHz, CD<sub>2</sub>Cl<sub>2</sub>)  $\delta_P$  -1.0; LRMS  $m/z$  (ESI<sup>+</sup>) 609.285 ([M+H]<sup>+</sup>, 100%). These data are in good agreement with the literature values.<sup>5</sup>

#### (-)-[(4S)-2,2-Dimethyl-1,3-dioxolan-4-yl]methyl octanoate (-)-S7

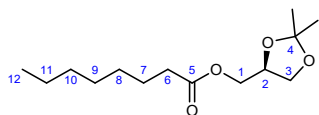

*N,N'*-Dicyclohexylcarbodiimide (6.14 g, 30.3 mmol, 2.0 eq) was added to a stirred solution of (*R*)-(-)-2,3-isopropylidene-*sn*-glycerol (-)-**28** (2.00 g, 15.1 mmol, 1.0 eq), octanoic acid (3.09 mL, 15.1 mmol, 1.0 eq) and 4-DMAP (0.11 g, 0.91 mmol, 0.06 eq) in CH<sub>2</sub>Cl<sub>2</sub> (45 mL), and was stirred for 16 h. The mixture was then diluted with hexane (20 mL), filtered through Celite® and washed with hexane (3 × 10 mL). The combined filtrates were concentrated *in vacuo* and the residue obtained was purified by column chromatography over silica gel (petroleum ether:EtOAc, 20:1) to yield (-)-**S7** (3.55 g, 91%) as a colorless oil:  $R_f$  0.18 (petroleum ether:EtOAc, 20:1);  $[\alpha]_D^{25} -12.0$  (c 1.0, hexane);  $\nu_{\max}$  (thin film)/cm<sup>-1</sup> 2987, 2956, 2930, 2858, 1741, 1457, 1371, 1255, 1215, 1161, 1087, 1057, 843; <sup>1</sup>H NMR (400 MHz, CDCl<sub>3</sub>)  $\delta_H$  4.36–4.25 (1H, m, H-2), 4.16 (1H, dd,  $J$  11.5, 4.7, H-1), 4.13–4.03 (2H, m, H-1' and H-3), 3.74 (1H, dd,  $J$  8.4, 6.2, H-3'), 2.34 (2H, t,  $J$  7.6, H-6), 1.68–1.57 (2H, m, H-7), 1.43 (3H, s, C(4)CH<sub>3</sub>), 1.37 (3H, s, C(4)CH<sub>3</sub>), 1.34–1.24 (8H, m, H-8 to H-11), 0.90–0.85 (3H, m, H-12). <sup>13</sup>C NMR (101 MHz, CDCl<sub>3</sub>)  $\delta_C$  173.8 (C-5), 110.0 (C-4), 73.8 (C-2), 66.5 (C-3), 64.7 (C-1), 34.3 (C-6), 31.8 (C-10), 29.2, 29.0 (C-8 and C-9), 26.8 (C(4)-CH<sub>3</sub>), 25.6 (C(4)-CH<sub>3</sub>), 25.0 (C-7), 22.7 (C-11), 14.2 (C-12); LRMS  $m/z$  (ESI<sup>+</sup>) 281.198 ([M+Na]<sup>+</sup>, 100%); HRMS  $m/z$  (ESI<sup>+</sup>) found

281.1724 [M+Na]<sup>+</sup> (C<sub>14</sub>H<sub>26</sub>O<sub>4</sub>Na requires 281.1723 [M+Na]<sup>+</sup>). These data are in good agreement with the literature values.

### (+)-(2S)-2,3-Dihydroxypropyl hexadecanoate (+)-S8

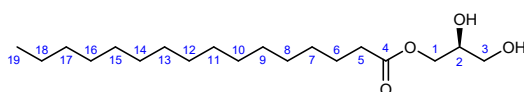

To acetone (**-**)-**29** (3.00 g, 8.10 mmol, 1.0 eq), was added 30 mL of a mixture of acetic acid and distilled H<sub>2</sub>O (4:1). The reaction mixture was stirred and heated to 50 °C for 2 h. Following complete consumption of the starting material as observed *via* TLC, the reaction mixture was transferred to a conical flask and diluted with distilled H<sub>2</sub>O (100 mL). Any solid formed was dissolved *via* the addition of CH<sub>2</sub>Cl<sub>2</sub> and vigorous swirling. Solid K<sub>2</sub>CO<sub>3</sub> was then slowly added to the resultant biphasic solution with swirling until effervescence ceased. The aqueous layer was then extracted with CH<sub>2</sub>Cl<sub>2</sub> (3 × 150 mL) and the combined organic extracts were washed with brine (150 mL), dried over Na<sub>2</sub>SO<sub>4</sub>, and concentrated *in vacuo*. The resultant colorless solid was then subject to crystallization from EtOAc and heptane to give 2,3-dihydroxypropyl hexadecanoate (**+**)-**S8** as white shiny crystals (2.43 g, 91%): *R*<sub>f</sub> 0.31 (petroleum ether:EtOAc, 1:1) m.p. 59–63 °C (hexane:EtOAc), [Lit.<sup>9</sup> 68.5–69.5 °C (pentane:EtOAc)]; [α]<sub>D</sub><sup>25</sup>+2.8 (c 3.4, pyridine) [lit.<sup>5</sup> [α]<sub>D</sub><sup>25</sup>+3.9 (c 2.9, pyridine)], [lit.<sup>9</sup>[α]<sub>D</sub><sup>23</sup>+4.14 (c 2.53, pyridine)]; δ<sub>H</sub> (400 MHz, CDCl<sub>3</sub>) 4.21 (1H, dd, *J* 11.6, 4.6, H-1), 4.15 (1H, dd, *J* 11.7, 6.1, H-1'), 3.98–3.89 (1H, m, H-2), 3.75–3.66 (1H, m, H-3), 3.60 (1H, dd, *J* 11.4, 5.7, H-3'), 2.49–2.42 (1H, br s, C(2)OH), 2.35 (2H, t, *J* 7.6, H-5), 2.01 (1H, br s, C(3)OH), 1.68–1.58 (2H, m, H-6), 1.36–1.22 (24H, m, H-7 to H-18) 0.91–0.84 (3H, t, *J* 6.7, H-19); LRMS *m/z* (ESI<sup>+</sup>) 353.309 ([M+Na]<sup>+</sup>, 100%); These data are in good agreement with the literature values.<sup>9</sup>

### (+)-(2S)-2,3-Dihydroxypropyl octanoate (+)-S9

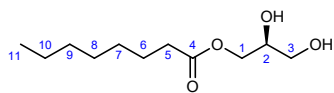

To acetonide **(-)-S7** (3.00 g, 11.6 mmol, 1.0 eq), was added 30 mL of a mixture of acetic acid and distilled H<sub>2</sub>O (4:1). The reaction mixture

was stirred and heated to 50 °C for 2 h. Following complete consumption of the starting material as observed *via* TLC, the reaction mixture was transferred to a conical flask and diluted with distilled H<sub>2</sub>O (100 mL). Any solid formed was dissolved *via* the addition of CH<sub>2</sub>Cl<sub>2</sub> and vigorous swirling. Solid K<sub>2</sub>CO<sub>3</sub> was then slowly added to the resultant biphasic solution with swirling until effervescence ceased. The aqueous layer was then extracted with CH<sub>2</sub>Cl<sub>2</sub> (3 × 150 mL) and the combined organic extracts were washed with brine (150 mL), dried over Na<sub>2</sub>SO<sub>4</sub>, and concentrated *in vacuo* to give diol **(+)-S9** (2.51 g, 99%) as a colorless oil with no need for further purification: *R*<sub>f</sub> 0.25 (petroleum ether:EtOAc, 1:1);  $[\alpha]_D^{25} +0.45$  (c 3.1, pyridine);  $\nu_{\max}$  (thin film)/cm<sup>-1</sup> 2956, 2926, 2857, 1737, 1169, 1109, 1049; <sup>1</sup>H NMR (400 MHz, CDCl<sub>3</sub>)  $\delta_H$  4.20 (1H, dd, *J* 11.7, 4.7, H-1), 4.15 (1H, dd, *J* 11.7, 6.1, H-1'), 3.97–3.89 (1H, m, H-2), 3.70 (1H, dd, *J* 11.5, 4.0, H-3), 3.60 (1H, dd, *J* 11.5, 5.8, H-3'), 2.57 (1H, s, C(2)OH), 2.35 (2H, t, *J* 7.6, H-5), 2.14 (1H, s, C(3)OH), 1.69–1.57 (2H, m, H-6), 1.36–1.22 (8H, m, H-7 to H-10), 0.92–0.84 (3H, m, H-11); <sup>13</sup>C NMR (101 MHz, CDCl<sub>3</sub>)  $\delta_C$  174.5 (C-4), 70.4 (C-2), 65.3 (C-1), 63.5 (C-3), 34.3 (C-5), 31.8, 29.2, 29.0, 25.1, 22.7 (C-6 to C-10), 14.2 (C-11); LRMS *m/z* (ESI<sup>+</sup>) 241.0 ([M+Na]<sup>+</sup>, 100%); HRMS *m/z* (ESI<sup>+</sup>) found 241.1411 [M+Na]<sup>+</sup> (C<sub>11</sub>H<sub>22</sub>O<sub>4</sub>Na requires 241.1410 [M+Na]<sup>+</sup>).

**(+)-(2S)-3-[Bis(4-methoxyphenyl)(phenyl)methoxy]-2-hydroxypropyl hexadecanoate (+)-S10**

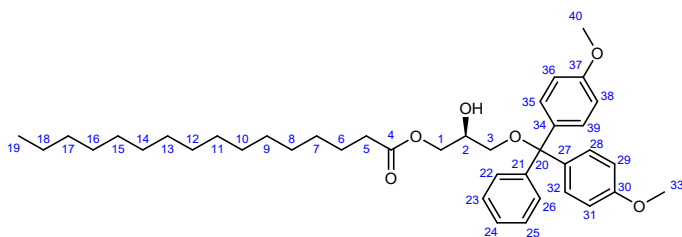

To a solution of diol **(+)-S8** (1.50 g, 4.54 mmol, 1.0 eq) in anhydrous pyridine (45 mL) was added 4,4'-dimethoxytrityl chloride (1.85 g, 5.45 mmol, 1.2 eq) in one

portion. After 50 min stirring at RT, the yellow solution was concentrated *in vacuo* at RT. The

residue obtained was purified by column chromatography over silica gel (petroleum ether:EtOAc, 95:5 to 80:20) to give **(+)-S10** (2.24 g, 78%) as a green-tinted oil:  $R_f$  0.54 (petroleum ether:EtOAc, 8:2);  $[\alpha]_D^{25} +2.4$  (c 1.0, CHCl<sub>3</sub>);  $\nu_{\max}$  (thin film)/cm<sup>-1</sup> 2924, 2853, 1737, 1608, 1509, 1251, 1177, 1036, 829; <sup>1</sup>H NMR(400 MHz, CDCl<sub>3</sub>)  $\delta_H$  7.44–7.39 (2H, m, H-22 and H-26), 7.34–7.26 (6H, m, H-23, H-25, H-H-28, H-32, H-35, H-39), 7.25–7.16 (1H, m, H-24), 6.86–6.80 (4H, m, H-29, H-31, H-36, H-38), 4.21 (1H, dd,  $J$  11.5, 4.4, H-1), 4.16 (1H, dd,  $J$  11.5, 6.1, H-1'), 4.03–3.94 (1H, m, H-2), 3.79 (6H, s, H-33 and H-40), 3.25–3.17 (2H, m, H-3), 2.40 (1H, d,  $J$  5.2, C(2)OH), 2.29 (2H, t,  $J$  7.6, H-5), 1.63–1.53 (2H, m, H-6), 1.35–1.21 (24H, m, H-7 to H-18), 0.92–0.84 (3H, m, H-19). <sup>13</sup>C NMR (101 MHz, CDCl<sub>3</sub>)  $\delta_C$  174.1 (C-4), 158.7 (C-30 and C-37), 144.7 (C-21), 135.9 (C-27 and C-34), 130.2 (C-28, C-32, C-35 and C-39), 128.2 (C-22 and C-26), 128.0 (C-23 and C-25), 127.0 (C-24), 113.3 (C-29, C-31, C-36 and C-38), 86.4 (C-20), 69.5 (C-2), 65.9 (C-1), 64.2 (C-3), 55.4 (C-33 and C-40), 34.3 (C-5), 32.1 (C-17), 29.84, 29.80, 29.79, 29.6, 29.5, 29.4, 29.3 (C-7 to C-16), 25.0 (C-6), 22.8 (C-18), 14.3 (C-19); LRMS  $m/z$  (ESI<sup>+</sup>) 655.473 ([M+Na]<sup>+</sup>, 100%); HRMS  $m/z$  (ESI<sup>+</sup>) found 655.3965 [M+Na]<sup>+</sup> (C<sub>40</sub>H<sub>56</sub>O<sub>6</sub>Na requires 655.3969 [M+Na]<sup>+</sup>).

**(+)-(2S)-3-[Bis(4-methoxyphenyl)(phenyl)methoxy]-2-hydroxypropyl octanoate (+)-S11**

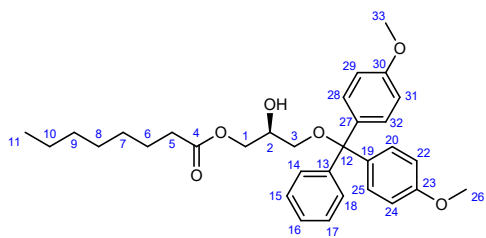

To a solution of diol **(+)-S9** (1.50 g, 6.87 mmol, 1.0 eq) in anhydrous pyridine (69 mL) was added 4,4'-dimethoxytrityl chloride (2.79 g, 8.24 mmol, 1.2 eq) in one portion. After 50 min stirring at RT, the yellow solution was concentrated *in vacuo* at RT. The residue obtained was purified by column chromatography over silica gel (petroleum ether:EtOAc, 10:0 to 8:2) to give alcohol **(+)-S11** (2.83 g, 79%) as a green-tinted oil:  $R_f$  0.54 (petroleum ether:EtOAc, 8:2);  $[\alpha]_D^{25} +3.1$  (c 1.0, CHCl<sub>3</sub>);  $\nu_{\max}$  (thin film)/cm<sup>-1</sup> 2929, 2857, 1736, 1608, 1509, 1250, 1176, 1035, 829; <sup>1</sup>H NMR (400 MHz, CDCl<sub>3</sub>)  $\delta_H$  7.44–7.39 (2H, m, H-14, H-16), 7.34–7.26 (6H, m, H-15, H-17, H-20, H-25, H-28, H-32), 7.24–7.19

(1H, m, H-16), 6.86–6.80 (4H, m, H-22, H-24, H-29, H-31), 4.21 (1H, dd,  $J$  11.5, 4.4, H-1), 4.16 (1H, dd,  $J$  12.1, 5.6, H-1'), 4.02–3.94 (1H, m, H-2), 3.79 (6H, s, H-26, H-33), 3.22 (1H, dd,  $J$  9.6, 5.0, H-3), 3.19 (1H, dd,  $J$  9.6, 5.6, H-3'), 2.42 (1H, d,  $J$  5.2, C(2)OH), 2.29 (2H, t,  $J$  7.6, H-5), 1.64–1.53 (2H, m, H-6), 1.35–1.22 (8H, m, H-7 to H-10), 0.88 (3H, t,  $J$  6.8, H-11);  $^{13}\text{C}$  NMR (101 MHz,  $\text{CDCl}_3$ )  $\delta_{\text{C}}$  174.1 (C-4), 158.7 (C-23, C-30), 144.7 (C-13), 135.9 (C-19, C-27), 130.2 (C-20, C-25, C-28, C-32), 128.2 (C-14, C-18), 128.0 (C-15, C-17), 127.0 (C-16), 113.3 (C-22, C-24, C-29, C-31), 86.4 (C-12), 69.5 (C-2), 65.9 (C-1), 64.2 (C-3), 55.4 (C-26, C-33), 34.3 (C-5), 31.8, 29.2, 29.0 (C-7 to C-9), 25.0 (C-6), 22.7 (C-10), 14.2 (C-11); LRMS  $m/z$  (ESI $^+$ ) 543.348 ([M+Na] $^+$ , 100%); HRMS  $m/z$  (ESI $^+$ ) found 543.2714 [M+Na] $^+$  ( $\text{C}_{32}\text{H}_{40}\text{O}_6\text{Na}$  requires 543.2717 [M+Na] $^+$ ).

**(+)-(2S)-3-[Bis(4-methoxyphenyl)(phenyl)methoxy]-2-(octanoyloxy)propyl hexadecanoate (+)-S12**

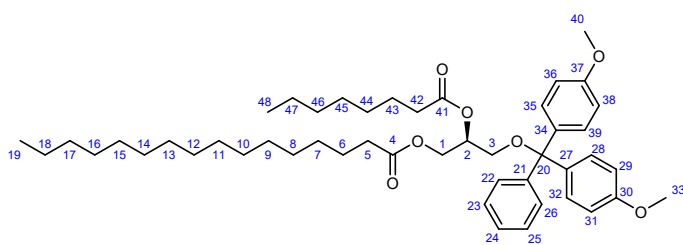

To a solution of alcohol **(+)-S10** (1.00 g, 1.58 mmol, 1.0 eq) in  $\text{CH}_2\text{Cl}_2$  (20 mL) was added DCC (392 mg, 1.90 mmol, 1.2 eq), 4-DMAP (12 mg, 0.10 mmol, 0.06 eq) and octanoic acid (0.25 mL, 1.6 mmol, 1.0 eq). The solution was stirred at RT for 18 h, after which the reaction mixture was diluted with hexane (20 mL). The suspension was filtered through celite, and the celite was subsequently washed with hexane ( $3 \times 10$  mL). The combined filtrates were concentrated *in vacuo* at RT. The resulting residue was purified by column chromatography over silica gel (petroleum ether:EtOAc, 100:0, to 92:8) which yielded **(+)-S12** (1.01 g, 84%) as a colorless oil:  $R_f$  0.50 (petroleum ether:EtOAc 9:1);  $[\alpha]_D^{25} +14.6$  (c 1.0,  $\text{CHCl}_3$ );  $\nu_{\text{max}}$  (thin film)/ $\text{cm}^{-1}$  2925, 2854, 1742, 1608, 1509, 1251, 1176, 1037, 829;  $^1\text{H}$  NMR(400 MHz,  $\text{CDCl}_3$ )  $\delta_{\text{H}}$  7.45–7.39 (2H, m, H-22 and H-26), 7.34–7.24 (6H, m, H-23, H-25, H-28, H-32, H-35, H-39), 7.24–7.18 (1H, m, H-24), 6.86–6.79 (4H, m, H-29, H-31, H-36, H-38), 5.30–5.22 (1H, m, H-2), 4.34 (1H, dd,  $J$

11.9, 3.7, H-1), 4.23 (1H, dd,  $J$  11.9, 6.7, H-1'), 3.79 (6H, s, H-33, H-40), 3.23 (1H, d,  $J$  1.6, H-3), 3.22 (1H, d,  $J$  1.9, H-3'), 2.33 (2H, td,  $J$  7.4, 1.0, H-5), 2.24 (2H, td,  $J$  8.0, 7.1, H-42), 1.69–1.49 (4H, m, H-6, H-43), 1.39–1.20 (32H, m, H-7 to H-18 and H-44 to H-47), 0.89 (2H, t, H-48), 0.88 (3H, t, H-19).  $^{13}\text{C}$  NMR (101 MHz,  $\text{CDCl}_3$ )  $\delta_{\text{C}}$  173.5, 173.2 (C-4, C-41), 158.7 (C-30 and C-37), 144.7 (C-21), 135.89, 135.86 (C-27, C-34), 130.14, 130.11 (C-28, C-32, C-35, C-39), 128.22, 127.94 (C-22, C-23, C-25, C-26), 127.0 (C-24), 113.3 (C-29, C-31, C-35, C-39), 86.2 (C-20), 70.6 (C-2), 63.1 (C-1), 62.2 (C-3), 55.3 (C-33, C-40), 34.6, 34.3 (C-5, C-42), 32.1, 31.8 (C-17, C-46), 29.83, 29.79, 29.62, 29.49, 29.47, 29.3, 29.2, 29.1 (C-7 to C-16 and C-44 and C-45), 25.1, 25.0 (C-6, C-43), 22.8, 22.8, (C-18, C-47), 14.3, 14.2 (C-19, C-48); LRMS  $m/z$  (ESI $^+$ ) 781.591 ([M+Na] $^+$ , 100%); HRMS  $m/z$  (ESI $^+$ ) found 781.5010 [M+Na] $^+$  ( $\text{C}_{48}\text{H}_{70}\text{O}_7\text{Na}$  requires 781.5014 [M+Na] $^+$ ).

**(+)-(2S)-1-[Bis(4-methoxyphenyl)(phenyl)methoxy]-3-(octanoyloxy)propan-2-yl hexadecanoate (+)-S13**

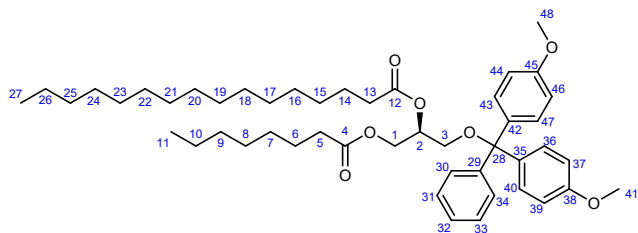

To a solution of alcohol **(+)-S11** (1.00 g, 1.92 mmol, 1.0 eq) in  $\text{CH}_2\text{Cl}_2$  (20 mL) was added DCC (475 mg, 2.30 mmol, 1.2 eq), 4-DMAP (14 mg, 0.12 mmol, 0.06 eq) and palmitic acid (492 mg, 1.92 mmol, 1.0 eq). The solution was stirred at RT for 18 h, after which the reaction mixture was diluted with hexane (20 mL). The suspension was filtered through celite, and the celite subsequently washed with hexane ( $3 \times 10$  mL). The combined filtrates were concentrated *in vacuo* at RT. The resulting residue was purified by column chromatography over silica gel (petroleum ether:EtOAc, 10:0 to 9:1) which yielded **(+)-S13** (1.00 g, 69%) as a colorless oil:  $R_f$  0.50 (petroleum ether:EtOAc, 9:1);  $[\alpha]_D^{25} +12.9$  (c 1.0,  $\text{CHCl}_3$ );  $\nu_{\text{max}}$  (thin film)/ $\text{cm}^{-1}$  2925, 2854, 1742, 1608, 1509, 1251, 1176, 1037, 829;  $^1\text{H}$  NMR (400 MHz,  $\text{CDCl}_3$ )  $\delta_{\text{H}}$  7.44–7.39 (2H, m, H-30, H-34), 7.29 (6H, m, H-31, H-33, H-36, H-40, H-43, H-47), 7.23–7.17 (1H, m, H-32), 6.85–

6.79 (4H, m, H-37, H-39, H-44, H-46), 5.29–5.22 (1H, m, H-2), 4.34 (1H, dd,  $J$  11.8, 3.7, H-1), 4.23 (1H, dd,  $J$  11.8, 6.7, H-1'), 3.79 (6H, s, H-41, H-48), 3.24 (1H, dd,  $J$  10.0, 4.9, H-3), 3.21 (1H, dd,  $J$  10.0, 5.1, H-3'), 2.36–2.30 (2H, m, H-5 or H-13), 2.26–2.21 (2H, m, H-5 or H-13), 1.68–1.50 (4H, m, H-6, H-14), 1.36–1.22 (32H, m, H-7 to H-10, and H-15 to H-26), 0.91–0.86 (6H, m, H-11 and H-27);  $^{13}\text{C}$  NMR (101 MHz,  $\text{CDCl}_3$ )  $\delta_{\text{C}}$  173.5, 173.2 (C-4, C-12), 158.6 (C-38 and C-35), 144.7 (C-29), 135.89, 135.86 (C-35, C-42), 130.13, 130.12, (C-36, C-40, C-43, C-47), 128.2, 127.9 (C-37, C-39, C-43, C-47), 127.0 (C-32), 113.3 (C-38, C-40, C-45, C-47), 86.2 (C-28), 70.6 (C-2), 63.1 (C-1), 62.2 (C-3), 55.3 (C-41, C-48), 34.6, 34.3 (C-5, C-13), 32.1, 31.8 (C-9, C-25), 29.83, 29.78, 29.6, 29.49, 29.47, 29.3, 29.2, 29.1 (C-7, C-8, C-15 to C-24), 25.1, 25.0 (C-6, C-14), 22.8, 22.7 (C-10, C-26), 14.3, 14.2 (C-11, C-27); LRMS  $m/z$  (ESI $^+$ ) 781.604 ([M+Na] $^+$ , 100%); HRMS  $m/z$  (ESI $^+$ ) found 781.5009 [M+Na] $^+$  ( $\text{C}_{48}\text{H}_{70}\text{O}_7\text{Na}$  requires 781.5014 [M+Na] $^+$ ).

#### (-)-(2S)-3-Hydroxy-2-(octanoyloxy)propyl hexadecanoate (-)-S14

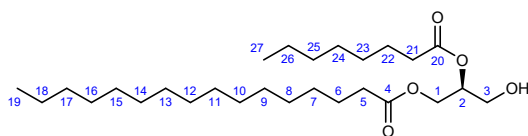

Aqueous acetic acid (AcOH:H<sub>2</sub>O, 4:1 v/v, 5 mL) was added to **(+)-S12** (800 mg, 1.05 mmol, 1.0 eq) and stirred vigorously. CH<sub>2</sub>Cl<sub>2</sub> was then added dropwise

until the biphasic mixture homogenized and became bright orange. The mixture was then stirred further at 50 °C for 2 h. Complete consumption of the starting material was monitored *via* TLC. The solution was then cooled to RT and concentrated *in vacuo*. The resulting residue was then purified *via* column chromatography over silica gel (petroleum ether:EtOAc, 100:0 to 84:16) yielding alcohol **(-)-S14** (387 mg, 81%, ~94% e.e.) which crystalized under a stream of nitrogen from EtOAc to form a colorless solid:  $R_f$  0.34 (petroleum ether:EtOAc, 9:1);  $[\alpha]_D^{25}$  -4.5 ( $c$  1.0,  $\text{CHCl}_3$ ); m.p. 27–28 °C (EtOAc);  $\nu_{\text{max}}$  (thin film)/ $\text{cm}^{-1}$  2924, 2854, 1742, 1466, 1164, 1108, 1052, 723;  $^1\text{H}$  NMR (400 MHz,  $\text{CDCl}_3$ )  $\delta_{\text{H}}$  5.08 (1H, m, H-2), 4.32 (1H, dd,  $J$  12.0, 4.5, H-1), 4.24 (1H, dd,  $J$  12.0, 5.6, H-1'), 3.75–3.71 (2H, m), 2.35 (2H, t,  $J$  7.5, H-5), 2.32 (2H, t,  $J$  7.5, H-21), 2.01

(1H, t, *J* 6.5, C(3)OH), 1.68–1.57 (4H, m, H-6, H-22), 1.37–1.20 (32H, m, H-7 to H-18 and H-23 to H-26), 0.92–0.84 (6H, m, H-19, H-27); <sup>13</sup>C NMR (101 MHz, CDCl<sub>3</sub>) δ<sub>C</sub> 173.9, 173.6 (C-4, C-20), 72.3 (C-2), 62.1 (C-3), 61.8 (C-1), 34.4, 34.3 (C-5, C-21), 32.1, 31.8 (C-17, C-25), 29.85, 29.81, 29.77, 29.6, 29.5, 29.4, 29.3, 29.2 (C-7 to C-16, C-23, C-24), 25.1, 25.0 (C-6, C-22), 22.8, 22.7 (C-18, C-26), 14.3, 14.2 (C-19, C-27); LRMS *m/z* (ESI<sup>+</sup>) 479.443 ([M+Na]<sup>+</sup>, 100%); HRMS *m/z* (ESI<sup>+</sup>) found 479.3708 [M+Na]<sup>+</sup> (C<sub>27</sub>H<sub>52</sub>O<sub>5</sub>Na requires 479.3707 [M+Na]<sup>+</sup>); The e.e. of (–)-**S14** was calculated by <sup>1</sup>H NMR using a chiral auxiliary (see **Figure S1**).

### (2S)-1-Hydroxy-3-(octanoyloxy)propan-2-yl hexadecanoate (–)-**S15**

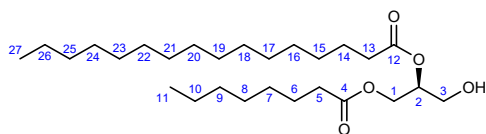

Aqueous acetic acid (AcOH:H<sub>2</sub>O, 4:1 v/v, 5 mL) was added to (+)-**S13** (800 mg, 1.05 mmol, 1.0 eq) and stirred vigorously. CH<sub>2</sub>Cl<sub>2</sub> was then added dropwise until the biphasic mixture homogenized and became bright orange. The mixture was then stirred further at 50 °C for 2 h. Complete consumption of the starting material was monitored *via* TLC. The solution was then cooled to RT and concentrated in *vacuo*. The resulting residue was then purified *via* column chromatography over silica gel (petroleum ether:EtOAc, 100:0, 84:16) yielding alcohol (–)-**S15** (389 mg, 81%, ~90% e.e.) which crystallized under a stream of nitrogen from EtOAc to form a colorless solid: *R*<sub>f</sub> 0.37 (petroleum ether:EtOAc, 9:1); [α]<sub>D</sub><sup>25</sup> –3.8 (c 1.0, CHCl<sub>3</sub>); m.p. 26–28 °C (EtOAc); ν<sub>max</sub> (thin film)/cm<sup>–1</sup> 2924, 2854, 1742, 1466, 1164, 1109, 1051, 723; <sup>1</sup>H NMR (400 MHz, CDCl<sub>3</sub>) δ<sub>H</sub> 5.11–5.05 (1H, m, H-2), 4.32 (1H, dd, *J* 12.0, 4.5, H-1), 4.24 (1H, dd, *J* 12.0, 5.7, H-1'), 3.75–3.71 (2H, m, H-3), 2.37–2.29 (4H, m, H-5, H-13), 2.02 (1H, t, *J* 6.5, C(3)OH), 1.68–1.57 (4H, m, C-6, C-14), 1.37–1.21 (34H, m, H-7 to H-10 and H-15 to H-26), 0.92–0.85 (6H, m, H-11, H-27); <sup>13</sup>C NMR (101 MHz, CDCl<sub>3</sub>) δ<sub>C</sub> 173.9, 173.6 (C-4, C-12), 72.3 (C-2), 62.1 (C-3), 61.7 (C-1), 34.5, 34.3 (C-5, C-13), 32.1, 31.8 (C-9, C-25), 29.84, 29.80, 29.77, 29.6, 29.5, 29.4, 29.24, 29.22, 29.1 (C-7, C-8, C-15 to C-24), 25.1, 25.0 (C-6, C-14), 22.8, 22.7 (C-10, C-26), 14.3, 14.2

(C-11, C-27); LRMS  $m/z$  (ESI<sup>+</sup>) 935.83 ([2M+Na]<sup>+</sup>, 100%); HRMS  $m/z$  (ESI<sup>+</sup>) found 479.3706 [M+Na]<sup>+</sup> (C<sub>27</sub>H<sub>52</sub>O<sub>5</sub>Na requires 479.3707 [M+Na]<sup>+</sup>); The e.e. of (–)-**S15** was calculated by <sup>1</sup>H NMR using a chiral auxiliary (see **Figure S1**).

**(+)-(2R)-3-((Benzyloxy)[di(propan-2-yl)amino]phosphanyl)oxy-2-(octanoyloxy)propyl hexadecanoate (+)-S16**

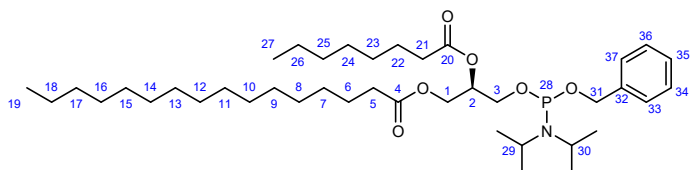

To a solution of benzyloxy-bis(*N,N*-diisopropylamino) phosphine **33** (558 mg, 1.65 mmol, 3.0 eq) in anhydrous CH<sub>2</sub>Cl<sub>2</sub> (6 mL) was added 1*H*-tetrazole (3.70 mL, 1.65 mmol, 3.0 eq, 0.45 M in MeCN). The solution was stirred for 10 min, after which, alcohol (–)-**S14** (250 mg, 0.547 mmol, 1.0 eq) was added in a single batch. The reaction mixture was stirred at RT for 18 h, then diluted with CH<sub>2</sub>Cl<sub>2</sub> (10 mL), and was then quenched by the addition of a saturated aqueous solution of NaHCO<sub>3</sub> (10 mL). The organic phase was extracted with CH<sub>2</sub>Cl<sub>2</sub> (3 × 10 mL). The combined organic layers were washed with brine (20 mL), dried over MgSO<sub>4</sub>, filtered, and then concentrated *in vacuo*. The residue obtained was purified by column chromatography over silica gel (hexane:EtOAc:Et<sub>3</sub>N, 85:10:5) to give phosphoramidite (+)-**S16** (415 mg, >99%) as a colorless viscous oil, containing a mixture of two diastereoisomers. Due to its unstable nature, this phosphoramidite was synthesized fresh before each use and was used without further characterization: *R*<sub>f</sub> 0.75 (petroleum ether:EtOAc:Et<sub>3</sub>N, 85:10:5); [α]<sub>D</sub><sup>25</sup> +7.9 (c 1.0, CHCl<sub>3</sub>); ν<sub>max</sub> (thin film)/cm<sup>-1</sup> 2962, 2925, 2854, 1743, 1457, 976; <sup>1</sup>H NMR (400 MHz, CDCl<sub>3</sub>) δ<sub>H</sub> 7.40–7.22 (10H, m, H-33, H-34, H-35, H-36, H-37, Diast. A and B), 5.23–5.14 (2H, m, H-2, Diast. A and B), 4.81–4.61 (4H, m, H-31, Diast. A and B), 4.38–4.30 (2H, m, H-1, Diast. A and B), 4.21–4.13 (2H, m, H-1', Diast. A and B), 3.83–3.58 (8H, m, H-3, H-29, H-30, Diast. A and B), 2.32–2.26 (8H, m, H-5, H-21, Diast. A and B), 1.66–1.56 (8H, m, H-6, H-22, Diast. A and B), 1.34–1.23 (64H, m, H-7 to H-18 and H-23 to H-26, Diast. A and B),

1.21–1.16 (24H, m, 2×C(29)CH<sub>3</sub>, 2×C(30)CH<sub>3</sub>, Diast. A and B), 0.91–0.84 (12H, m, H-19, H-27, Diast. A and B); <sup>31</sup>P NMR (162 MHz, CDCl<sub>3</sub>) δ<sub>P</sub> 148.8 (P-28, Diast. A), 148.7 (P-28, Diast. B); LRMS *m/z* (ESI<sup>+</sup>) 694.575 ([M+H]<sup>+</sup>, 62%); HRMS *m/z* (ESI<sup>+</sup>) found 694.5164 [M+H]<sup>+</sup> (C<sub>40</sub>H<sub>73</sub>NO<sub>6</sub>P requires 694.5170 [M+H]<sup>+</sup>).

**(+)-(7*R*)-4-(Benzyloxy)-2-methyl-10-oxo-3-(propan-2-yl)-5,9-dioxo-3-aza-4-phosphoheptadecan-7-yl hexadecanoate (+)-S17**

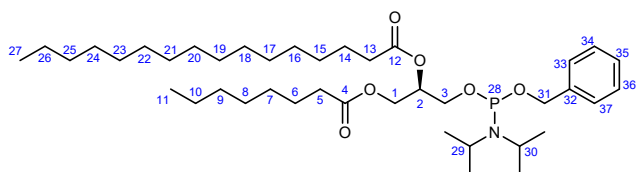

To a solution of benzyloxy-bis(*N,N*-diisopropylamino) phosphine **33** (558 mg, 1.65 mmol, 2.5 eq) in anhydrous CH<sub>2</sub>Cl<sub>2</sub>

(7 mL) was added 1*H*-tetrazole (4.40 mL, 1.98 mmol, 3.0 eq, 0.45 M in MeCN). The solution was stirred for 10 min, after which, a solution of alcohol (–)-**S15** (300 mg, 0.657 mmol, 1.0 eq) in anhydrous CH<sub>2</sub>Cl<sub>2</sub> (18 mL) was added dropwise. The reaction mixture was stirred at RT for 18 h, then diluted with CH<sub>2</sub>Cl<sub>2</sub> (10 mL), and was then quenched by the addition of a saturated aqueous solution of NaHCO<sub>3</sub> (10 mL). The organic phase was extracted with CH<sub>2</sub>Cl<sub>2</sub> (3 × 10 mL). The combined organic layers were washed with brine (30 mL), dried over MgSO<sub>4</sub>, filtered, and then concentrated *in vacuo*. The residue obtained was purified by column chromatography over silica gel (hexane:EtOAc:Et<sub>3</sub>N, 85:10:5) to give phosphoramidite (+)-**S17** (420 mg, 92%) as a colorless viscous oil, containing a mixture of two diastereoisomers. Due to its unstable nature, this phosphoramidite was synthesized fresh before each use and used without further characterization: *R<sub>f</sub>* 0.75 (petroleum ether:EtOAc:Et<sub>3</sub>N, 85:10:5); [α]<sub>D</sub><sup>25</sup> +6.9 (c 1.0, CHCl<sub>3</sub>); ν<sub>max</sub> (thin film)/cm<sup>-1</sup> 2963, 2926, 2855, 1743, 1457, 976; <sup>1</sup>H NMR (400 MHz, CDCl<sub>3</sub>) δ<sub>H</sub> 7.39–7.22 (10H, m, H-33, H-34, H-35, H-36, H-37, Diast. A and B), 5.24–5.15 (2H, m, H-2, Diast. A and B), 4.81–4.61 (4H, m, H-31, Diast. A and B), 4.36 (1H, dd, *J* 8.5, 3.8, H-1' Diast. A), 4.33 (1H, dd, *J* 8.5, 3.8, H-1', Diast. B), 4.19 (1H, dd, *J* 6.3, 5.0, H-1'' Diast. A), 4.16 (1H, dd, *J* 6.3, 5.0, H-1'' Diast. B), 3.83–3.58 (8H, m, H-3, H-29, H-30, Diast. A and B), 2.33–2.26 (8H, m, H-5, H-21, Diast. A and B), 1.66–1.55 (8H, m, H-6, H-14, Diast. A and B), 1.35–1.23 (64H, m, H-7 to H-10 and H-15

to H-26, Diast. A and B), 1.21–1.16 (24H, m, 2×C(29)CH<sub>3</sub>, 2×C(30)CH<sub>3</sub>), 0.92–0.84 (12H, m, H-11, H-28, Diast. A and B). <sup>31</sup>P NMR (162 MHz, CDCl<sub>3</sub>) δ<sub>P</sub> 148.8 (P-28, Diast. A), 148.7 (P-28, Diast. B); LRMS *m/z* (ESI<sup>+</sup>) 694.549 ([M+H]<sup>+</sup>, 86%).

**(+)-(2*R*)-3-[[[(Benzyloxy){(3*aR*,4*S*,5*R*,6*S*,7*R*,7*aR*)-5,7-bis(benzyloxy)-6-[(3-oxo-1,5-dihydro-3*H*-2,4,3<sup>λ</sup>5-benzodioxaphosphepin-3-yl)oxy]hexahydrospiro[1,3-benzodioxole-2,1'-cyclopentan]-4-yl]oxy]phosphoryl]oxy}-2-(octanoyloxy)propyl hexadecanoate (+)-S18**

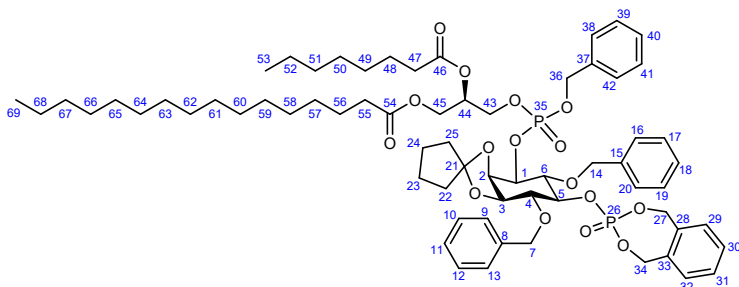

To a solution of phosphoramidite **(+)-S16** (270 mg, 0.387 mmol, 3.0 eq) in anhydrous CH<sub>2</sub>Cl<sub>2</sub> (6 mL) was added 1*H*-tetrazole (0.86 mL, 0.39 mmol, 3.0 eq, 0.45 M in

MeCN). After 10 min, protected inositol **(+)-S6** (78 mg, 0.13 mmol, 1 eq) was added as a single batch to the cloudy reaction mixture, and the mixture was stirred at RT for a further 18 h. The reaction mixture was then cooled to –78 °C and *m*CPBA (66 mg, 0.39 mmol, 3.0 eq, 77%) was added in one portion. The reaction mixture was stirred for 1 h, warmed to RT, stirred for a further 3 h, and then quenched by the addition of an aqueous solution of Na<sub>2</sub>S<sub>2</sub>O<sub>3</sub> (10% w/v, 6 mL). After stirring for 15 min, the aqueous phase was extracted with CH<sub>2</sub>Cl<sub>2</sub> (4 × 5 mL) and the combined organic layers were washed with brine (10 mL), dried over Na<sub>2</sub>SO<sub>4</sub>, filtered, and then concentrated *in vacuo*. Purification by column chromatography over silica gel (petroleum ether:EtOAc, 10:0 to 5:5) yielded **(+)-S18** (128 mg, 81%) as a colorless, amorphous solid containing a mixture of two diastereoisomers: *R<sub>f</sub>* 0.34 (petroleum ether:EtOAc, 5:5); [α]<sub>D</sub><sup>25.6</sup> +2.48 (*c* 1.0, CHCl<sub>3</sub>); ν<sub>max</sub> (thin film)/cm<sup>-1</sup> 2954, 2925, 2854, 1743, 1338, 1013, 735, 698; <sup>1</sup>H NMR (600 MHz, CD<sub>2</sub>Cl<sub>2</sub>) δ<sub>H</sub> 7.43–7.25 (32H, m, H-9 to H-13, H-16 to H-20, H-38 to H-42, H-30 and H-31 Diast. A and B), 7.23–7.20 (4H, m, H-29 and H-32 Diast. A and B), 5.20–5.15 (1H, m, H-44 Diast. A), 5.12–4.93 (13H, m, H-44 Diast. B, H-27, H-34, H-36 Diast. A and B), 4.86–4.81 (4H, m, H-7, H-14 Diast. A and B), 4.76–4.71 (4H, m, H-7', H-14' Diast. A and B), 4.71–4.66 (2H, m, H-1 Diast.

A and B), 4.63–4.57 (2H, m, H-5 Diast. A and B), 4.49 (1H, dd,  $J$  6.3, 3.7, H-2 Diast. A), 4.47 (1H, dd,  $J$  6.3, 3.7, H-2 Diast. B), 4.27–4.22 (3H, m, H-3 Diast. A and B, H-45 Diast. A), 4.19–4.04 (7H, m, H-45' Diast. A, H-45 Diast. B, H-43 Diast. A and B, H-43' Diast. A, H-6 Diast. A and B), 4.01 (1H, ddd,  $J$  11.0, 6.5, 4.2, H-43' Diast. B), 3.95 (1H, dd,  $J$  12.0, 6.0, H-45' Diast. B), 3.91–3.87 (2H, m, H-4 Diast. A and B), 2.31–2.20 (8H, m, H-47, H-55 Diast. A and B), 2.01–1.89 (4H, m, H-22, H-25 Diast. A and B), 1.76–1.50 (20H, m, H-22', H-25' Diast. A and B, H-23, H-24, H-48, H-56 Diast. A and B), 1.32–1.22 (64H, m, H-49 to H-52, H-57 to H-68 Diast. A and B), 0.88 (6H, t,  $J$  7.0, H-53 or H-69 Diast. A and B), 0.87 (6H, t,  $J$  7.0, H-53 or H-69 Diast. A and B);  $^{13}\text{C}$  NMR (151 MHz,  $\text{CD}_2\text{Cl}_2$ )  $\delta_{\text{C}}$  173.42, 173.38 (C-54 Diast. A and B), 173.1, 173.0 (C-46 Diast. A and B), 138.5, 138.40, 138.35 (C-8, C-15 Diast. A and B), 136.27 (d,  $J$  7.8, C-37 Diast. A), 136.21 (d,  $J$  7.6, C-37 Diast. B), 135.84, 135.79 (C-28, C-33 Diast. A and B), 129.38, 129.36, 129.1, 128.99, 128.96, 128.93, 128.9, 128.7, 128.6, 128.38, 128.35, 128.32, 128.27, 128.1, 128.06 (t,  $J$  2.8) (C-9 to C-13, C-16 to C-20, C-29 to C-32, C-38 to C-42 Diast. A and B), 120.5 (C-21 Diast. A and B), 80.49, 80.45 (C-5 Diast. A and B), 79.59, 79.57 (C-4 Diast. A and B), 78.69–78.45 (mp, C-6 Diast. A and B), 77.7 (C-3 Diast. A and B), 75.64 (t,  $J$  5.8, C-1 Diast. A and B), 74.6 (C-2, C-7 Diast. A and B), 73.5 (C-14 Diast. A and B), 69.89 (d,  $J$  2.7, C-36 Diast. A), 69.86 (d,  $J$  2.7, C-36 Diast. B), 69.68 (t,  $J$  7.3, C-44 Diast. A and B), 68.73, 68.68 (C-27 and C-34 Diast. A and B), 66.07 (d,  $J$  5.3, C-43 Diast. A), 65.94 (d,  $J$  5.3, C-43 Diast. B), 62.0 (C-45 Diast. A), 61.9 (C-45 Diast. B), 36.9, 36.80, 36.77 (C-22, C-25 Diast. A and B), 34.5, 34.4, 34.34, 34.32 (C-47, C-55 Diast. A and B), 32.3, 32.1, 30.12, 30.10, 30.07, 29.9, 29.8, 29.7, 29.5, 29.44, 29.42, 29.4 (C-49, C-50, C-57 to C-66 Diast. A and B), 25.3, 25.23, 25.20 (C-48, C-56 Diast. A and B), 24.25, 24.22, 23.6 (C-23, C-24 Diast. A and B), 23.1, 23.0 (C-52, C-68 Diast. A and B), 14.29, 14.25 (C-53, C-69 Diast. A and B).  $^{31}\text{P}$  NMR (243 MHz,  $\text{CD}_2\text{Cl}_2$ )  $\delta_{\text{P}}$  -0.9 (P-26), -1.8 (P-35 Diast. A), -1.9 (P-35 Diast. B); LRMS  $m/z$  (ESI $^+$ ) 1217.63 ([M+H] $^+$ , 100%); HRMS  $m/z$  (ESI $^+$ ) found 1239.5873 [M+Na] $^+$  ( $\text{C}_{67}\text{H}_{94}\text{O}_{16}\text{P}_2\text{Na}$  requires 1239.5909 [M+Na] $^+$ ); NP-HPLC  $t_{\text{R}}$  = 4.66 min (Diast. A), 5.19 (Diast. B.), 99.7% @ 254 nm, 99.0% @ 220 nm.

**(+)-(6R)-3-({(3aR,4S,5R,6S,7R,7aR)-5,7-Bis(benzyloxy)-6-[(3-oxo-1,5-dihydro-3H-2,4,3<sup>λ</sup>5-benzodioxaphosphepin-3-yl)oxy]hexahydrospiro[1,3-benzodioxole-2,1'-cyclopentan]-4-yl}oxy)-3,9-dioxo-1-phenyl-2,4,8-trioxo-3<sup>λ</sup>5-phosphahexadecan-6-yl hexadecanoate (+)-S19**

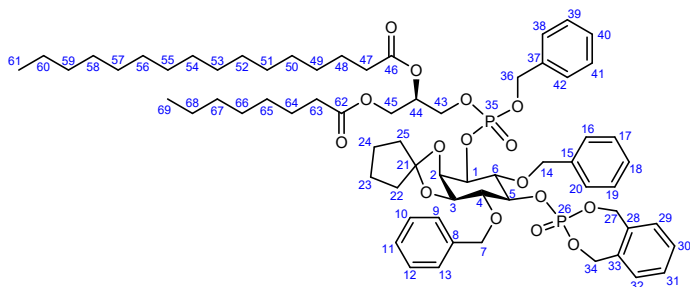

To a solution of phosphoramidite **(+)-S17** (270 mg, 0.387 mmol, 3.0 eq) in anhydrous CH<sub>2</sub>Cl<sub>2</sub> (6 mL) was added 1*H*-tetrazole (0.86 mL, 0.39 mmol, 3.0 eq, 0.45 M in MeCN). After 10 min, inositol

**(+)-S6** (78 mg, 0.13 mmol, 1.0 eq) was added as a single batch to the cloudy reaction mixture, and the mixture was stirred at RT for a further 18 h. The reaction mixture was then cooled to -78 °C and *m*CPBA (66 mg, 0.39 mmol, 3.0 eq, >77%) was added in one portion. The reaction mixture was stirred for 1 h, warmed to RT, stirred for a further 3 h, and then quenched by the addition of an aqueous solution of Na<sub>2</sub>S<sub>2</sub>O<sub>3</sub> (10% w/v, 5 mL). After stirring for 15 min, the aqueous phase was extracted with CH<sub>2</sub>Cl<sub>2</sub> (4 × 5 mL) and the combined organic layers were washed with brine (15 mL), dried over Na<sub>2</sub>SO<sub>4</sub>, filtered, and then concentrated *in vacuo*. Purification by column chromatography over silica gel (petroleum ether:EtOAc, 10:0 to 5:5) yielded **(+)-S19** (137 mg, 88%) as a colorless, amorphous solid containing a mixture of two diastereoisomers: *R<sub>f</sub>* 0.34 (petroleum ether:EtOAc, 5:5);  $[\alpha]_D^{25} +2.09$  (c 1.0, CHCl<sub>3</sub>);  $\nu_{\max}$  (thin film)/cm<sup>-1</sup> 2925, 2854, 1743, 1338, 1014, 735, 698; <sup>1</sup>H NMR (600 MHz, CD<sub>2</sub>Cl<sub>2</sub>)  $\delta_H$  7.45–7.24 (34H, m, H-9 to H-13, H-16 to H-20, H-38 to H-42, H-30 and H-31 Diast. A and B), 7.24–7.19 (4H, m, H-29 and H-32 Diast. A and B), 5.20–5.15 (1H, m, H-44 Diast. A), 5.12–4.92 (13H, m, H-44 Diast. B, H-27, H-34, H-36 Diast. A and B), 4.86–4.81 (4H, m, H-7, H-14 Diast. A and B), 4.76–4.71 (4H, m, H-7', H-14' Diast. A and B), 4.71–4.66 (2H, m, H-1 Diast. A and B), 4.63–4.57 (2H, m, H-5 Diast. A and B), 4.49 (1H, dd, *J* 6.4, 3.8, H-2 Diast. A), 4.47 (1H, dd, *J* 6.3, 3.7, H-2 Diast. B), 4.27–4.22 (3H, m, H-3 Diast.

A and B, H-45 Diast. A), 4.19–4.05 (7H, m, H-45' Diast. A, H-45 Diast. B, H-43 Diast. A and B, H-43' Diast. A, H-6 Diast. A and B), 4.01 (1H, ddd,  $J$  10.9, 6.5, 4.1, H-43' Diast. B), 3.95 (1H, dd,  $J$  12.0, 6.0, H-45' Diast B), 3.89 (2H, ddd,  $J$  7.3, 6.0, 2.8, H-4 Diast. A and B), 2.31–2.20 (8H, m, H-47, H-63 Diast. A and B), 2.00–1.89 (4H, m, H-22, H-25 Diast. A and B), 1.76–1.50 (20H, m, H-22', H-25' Diast. A and B, H-23, H-24, H-48, H-64 Diast. A and B), 1.40–1.21 (64H, m, H-49 to H-60, H-65 to H-68 Diast. A and B), 0.88 (12H, t,  $J$  6.8, H-61, H-69 Diast. A and B);  $^{13}\text{C}$  NMR (151 MHz,  $\text{CD}_2\text{Cl}_2$ )  $\delta_{\text{C}}$  173.41, 173.36 (C-62 Diast. A and B), 173.1, 173.0 (C-46 Diast. A and B), 138.5, 138.4, 138.3 (C-8, C-15 Diast. A and B), 136.25 ( $d_{\text{p}}$ ,  $J_{\text{p}}$  7.1, C-37 Diast. A), 136.18 ( $d_{\text{p}}$ ,  $J_{\text{p}}$  7.1, C-37 Diast. B), 135.82, 135.77 (C-28, C-33 Diast. A and B), 129.4, 129.3, 129.1, 128.97, 128.95, 128.92, 128.86, 128.7, 128.6, 128.4, 128.34, 128.30, 128.25, 128.1, 128.05 ( $t_{\text{p}}$ ,  $J_{\text{p}}$  2.9) (C-9 to C-13, C-16 to C-20, C-29 to C-32, C-38 to C-42 Diast. A and B), 120.4 (C-21 Diast. A and B), 80.45, 80.41 (C-5 Diast. A and B), 79.56, 79.54 (C-4 Diast. A and B), 78.6–78.4 ( $m_{\text{p}}$ , C-6 Diast. A and B), 77.6 (C-3 Diast. A and B), 75.6 ( $t_{\text{p}}$ ,  $J_{\text{p}}$  5.5, C-1 Diast. A and B) 74.64, 74.61, 74.60, 74.58, (C-2, C-7 Diast. A and B) 73.48, 73.47 (C-14 Diast. A and B), 69.87 ( $d_{\text{p}}$ ,  $J_{\text{p}}$  2.9, C-36 Diast. A), 69.83 ( $d_{\text{p}}$ ,  $J_{\text{p}}$  2.9, C-36 Diast. B), 69.73–69.57 ( $m_{\text{p}}$ , C-44 Diast. A and B), 68.75–68.61 ( $m_{\text{p}}$ , C-27 and C-34 Diast. A and B), 66.05 ( $d_{\text{p}}$ ,  $J_{\text{p}}$  5.3, C-43 Diast. A), 65.92 ( $d_{\text{p}}$ ,  $J_{\text{p}}$  5.2, C-43 Diast. B), 62.0 (C-45 Diast. A), 61.9 (C-45 Diast. B), 36.9, 36.79, 36.76 (C-22, C-25 Diast. A and B), 34.47, 34.42, 34.32, 34.29 (C-47, C-63 Diast. A and B), 32.3 (C-59 Diast. A and B), 32.1 (C-67 Diast. A and B), 30.11, 30.09, 30.06, 29.9, 29.8, 29.7, 29.49, 29.47, 29.46, 29.3 (C-49 to C-58, C-65, C-66 Diast. A and B), 25.23, 25.22, 25.20 (C-48, C-64 Diast. A and B), 24.23, 24.20, 23.6 (C-23, C-24 Diast. A and B), 23.1, 23.0 (C-60, C-68 Diast. A and B), 14.3, 14.2 (C-61, C-69 Diast. A and B);  $^{31}\text{P}$  NMR (162 MHz,  $\text{CD}_2\text{Cl}_2$ )  $\delta_{\text{P}}$  -0.9 (P-26), -1.8 (P-35 Diast. A), -1.9 (P-35 Diast. B); LRMS  $m/z$  (ESI $^{+}$ ) 1217.67 ([M+H] $^{+}$ , 100%); HRMS  $m/z$  (ESI $^{+}$ ) found 1239.5879 [M+Na] $^{+}$  ( $\text{C}_{67}\text{H}_{94}\text{O}_{16}\text{P}_2\text{Na}$  requires 1239.5909 [M+Na] $^{+}$ ); NP-HPLC  $t_{\text{R}}$  = 4.74 min (Diast. A), 5.19 min (Diast B.), 99.6% @ 254 nm, 99.5% @ 220 nm.

**(+)-(2R)-3-[(Hydroxy{[(1R,2R,3R,4R,5S,6R)-2,3,4,6-tetrahydroxy-5-(phosphonoxy)cyclohexyl]oxy}phosphoryl)oxy]-2-(octanoyloxy)propyl hexadecanoate (+)-7**

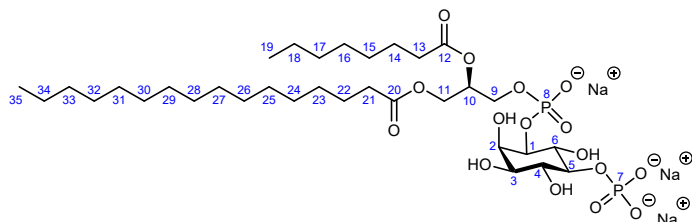

To a solution of protected PI(5)P **(+)-18** (36 mg, 0.030 mmol, 1.0 eq) in a mixture of *t*BuOH (1.36 mL) and H<sub>2</sub>O (0.24 mL) was added palladium black (64 mg, 0.60 mmol, 20 eq). The flask was purged with Ar<sub>(g)</sub>, before being placed under vacuum. H<sub>2(g)</sub> was then bubbled through the solution, and the reaction mixture was stirred vigorously at RT under an atmosphere of H<sub>2(g)</sub> for 17 h. The flask was then purged with Ar<sub>(g)</sub> and NaHCO<sub>3</sub> (8 mg, 0.09 mmol, 3.0 eq) was then added in one portion to the reaction mixture. The mixture was stirred for a further 2 h under an atmosphere of H<sub>2(g)</sub>, with freshly added palladium black (32 mg, 0.30 mmol, 10 eq) to ensure complete deprotection. The reaction mixture was finally purged with Ar<sub>(g)</sub> and filtered through a PTFE syringe filter. The remaining palladium was further washed with milliQ H<sub>2</sub>O (3 × 5 mL), which again, was passed through the same syringe filter. The combined filtrates were lyophilized to give **(+)-7** (15 mg, 60%) as a fluffy, colorless solid. The compound was stored at -80 °C as the sodium salt:  $\nu_{\max}$  (solid)/cm<sup>-1</sup> 2922, 2853, 1737, 1068, 975, 864, 816, 721; <sup>1</sup>H NMR (600 MHz, MeOD)  $\delta_{\text{H}}$  5.28–5.22 (1H, m, H-10), 4.43\* (1H, m, H-11') 4.20 (1H, dd, *J* 12.2, 7.6, H-11''), 4.16 (1H, dd, *J* 2.8, 2.8, H-2), 4.08–3.97 (3H, m, H-1 and H-9), 3.87–3.73 (3H, m, H-4, H-5 and H-6), 3.51 (1H, dd, *J* 9.6, 2.8, H-3), 2.37–2.28 (4H, m, H-13 and H-21), 1.65–1.52 (4H, m, H-14 and H-22), 1.36–1.21 (32H, m, H-15 to H-19 and H-23 to H-34), 0.87 (3H, t, *J* 7.0, H-19 or H-35), 0.87 (3H, t, *J* 7.0, H-19 or H-35); <sup>31</sup>P NMR (243 MHz, MeOD)  $\delta_{\text{P}}$  4.32 (P-7), 0.10 (P-8); <sup>13</sup>C NMR (151 MHz, MeOD)  $\delta_{\text{C}}$  175.2, 174.9 (C-12, C-20), 79.1 (C-5), 77.0 (C-1), 72.9 (C-4), 72.1 (C-2), 72.0 (C-6), 71.8 (C-3), 71.44–71.38 (m, C-10), 64.4 (C-9), 63.7 (C-11), 34.9, 34.8 (C-13, C-

21), 32.6, 32.4, 30.32, 30.28, 30.19, 30.0, 29.8, 29.72, 29.68, 25.61, 25.56, 23.31, 23.28 (C-14 to C-18 and C-22 to C-34), 14.5 (C-19 and C-35); LRMS  $m/z$  (ESI<sup>-</sup>) 777.3 ([M-H]<sup>-</sup>, 100%); HRMS  $m/z$  (ESI<sup>-</sup>) found 777.3592 [M-H]<sup>-</sup> (C<sub>33</sub>H<sub>63</sub>O<sub>16</sub>P<sub>2</sub> requires 777.3597 [M-H]<sup>-</sup>).\*obscured by H<sub>2</sub>O peak, observed in HSQC.

**(2R)-1-[(Hydroxy{[(1R,2R,3R,4R,5S,6R)-2,3,4,6-tetrahydroxy-5-(phosphonooxy)cyclohexyl]oxy}phosphoryl)oxy]-3-(octanoyloxy)propan-2-yl hexadecanoate (+)-8**

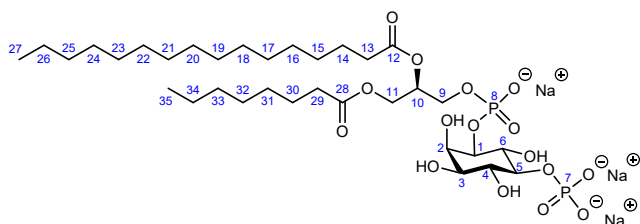

To a solution of protected PI(5)P **(+)-S19** (40 mg, 0.033 mmol, 1.0 eq) in a mixture of <sup>t</sup>BuOH (1.36 mL) and H<sub>2</sub>O (0.24 mL) was added palladium black (70 mg, 0.66 mmol, 20

eq). The flask was purged with Ar<sub>(g)</sub>, before being placed under vacuum. H<sub>2(g)</sub> was then bubbled through the solution, and the reaction mixture was stirred vigorously at RT under an atmosphere of H<sub>2(g)</sub> for 17 h. The flask was then purged with Ar<sub>(g)</sub> and NaHCO<sub>3</sub> (8 mg, 0.09 mmol, 3.0 eq) was then added in one portion to the reaction mixture. The mixture was stirred for a further 2 h under an atmosphere of H<sub>2(g)</sub>, with freshly added palladium black (35 mg, 0.33 mmol, 10 eq) to ensure complete deprotection. The reaction mixture was finally purged with Ar<sub>(g)</sub> and filtered through a PTFE syringe filter. The remaining palladium was further washed with milliQ H<sub>2</sub>O (3 × 5 mL), which again, was passed through the same syringe filter. The combined filtrates were lyophilized to give **(+)-8** (21 mg, 75%) as a fluffy, colorless solid. The compound was stored at -80 °C as the sodium salt:  $\nu_{\max}$  (solid)/cm<sup>-1</sup> 2922, 2853, 1739, 1225, 1068, 978, 866, 833, 709; <sup>1</sup>H NMR (600 MHz, MeOD)  $\delta_{\text{H}}$  5.27–5.22 (1H, m, H-10), 4.42\* (1H, m, H-11'), 4.19 (1H, dd,  $J$  12.2, 7.5, H-11''), 4.16 (1H, dd,  $J$  2.9, 2.9, H-2), 4.08–3.92 (3H, m, H-1 and H-9), 3.88–3.73 (3H, m, H-4, H-5 and H-6), 3.51 (1H, dd,  $J$  9.7, 2.9, H-3), 2.36–2.28 (4H, m, H-13 and H-29), 1.64–1.53 (4H, m, H-14 and H-30), 1.35–1.20 (32H, m, H-15 to H-26 and H-31 to H-34), 0.87 (3H, t,  $J$  7.1, H-27 or H-35),

0.87 (4H, t,  $J$  7.1, H-27 or H-35);  $^{31}\text{P}$  NMR (243 MHz, MeOD)  $\delta_{\text{P}}$  3.72 (P-7), 0.07 (P-8);  $^{13}\text{C}$  NMR (151 MHz, MeOD)  $\delta_{\text{C}}$  175.2, 174.9 (C-12, C-28), 78.9 (C-5), 77.0 (C-1), 72.9 (C-4), 72.1 (C-2), 71.9 (C-6), 71.8 (C-3), 71.3 (C-10), 64.4 (C-9), 63.7 (C-11), 34.9, 34.8 (C-13 and C-29), 32.6, 32.4 (C-25 and C-33), 30.35, 30.32, 30.28, 30.24, 30.1, 30.0, 29.80, 29.76, 29.6 (C-15 to C-24 and C-31 to C-32), 25.6, 25.5 (C-14 and C-30), 23.30, 23.25 (C-26 and C-34), 14.50, 14.47 (C-27 and C-35); LRMS  $m/z$  (ESI $^{-}$ ) 777.3 ([M-H] $^{-}$ , 100%); HRMS  $m/z$  (ESI $^{-}$ ) found 777.3586 [M-H] $^{-}$  (C $_{33}$ H $_{63}$ O $_{16}$ P $_2$  requires 777.3597 [M-H] $^{-}$ ). \*obscured by H $_2$ O peak, observed in HSQC.

**(+)-(2R)-3-[[[(2S)-2-Methoxy-2-phenylacetyl]oxy]-2-(octanoyloxy)propyl hexadecanoate (+)-S20**

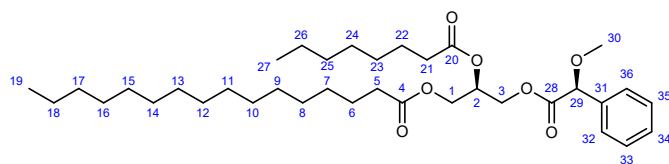

(S)-(+)- $\alpha$ -Methoxyphenylacetic acid (5 mg,

0.03 mmol, 2.0 eq),  $N,N'$ -

dicyclohexylcarbodiimide (10 mg,

0.049 mmol, 2.7 eq) and 4-DMAP (1 mg, 0.008 mmol, 0.5 eq) were added to a solution of alcohol

(-)-**S14** (7 mg, 0.02 mmol, 1.0 eq) in CH $_2$ Cl $_2$  (0.5 mL). After stirring at RT for 4 h, the reaction

mixture was diluted with CH $_2$ Cl $_2$  (5 mL), and the organic layer was washed with a saturated

aqueous solution of NaHCO $_3$  (2  $\times$  3 mL), and brine (3 mL), then dried over MgSO $_4$ , filtered, and

concentrated *in vacuo*. Purification by column chromatography over silica gel (petroleum

ether:Et $_2$ O, 10:0 to 7:3) gave **(+)-S20** (10 mg, 83%) as a colorless film:  $R_f$  0.77 (petroleum

ether:EtOAc, 6:4);  $[\alpha]_D^{25} +18.4$  (c 0.83, CHCl $_3$ );  $\nu_{\text{max}}$  (thin film)/cm $^{-1}$  2921, 2851, 1745, 1463, 1163,

1114, 727;  $^1\text{H}$  NMR (600 MHz, CDCl $_3$ )  $\delta_{\text{H}}$  7.44–7.31 (5H, m, H-32 to H-36), 5.20–5.16 (1H, m, H-

2), 4.77 (1H, s, H-29), 4.36 (1H, dd,  $J$  11.9, 4.3, H-3'), 4.20 (1H, dd,  $J$  11.9, 5.6, H-3''), 4.18 (1H,

dd,  $J$  11.9, 4.5, H-1'), 3.97 (1H, dd,  $J$  11.9, 5.9, H-1''), 3.41 (3H, s, H-30), 2.28–2.24 (2H, m, H-5),

2.23–2.13 (2H, m, H-21), 1.61–1.50 (4H, m, H-6 and H-22), 1.33–1.21 (32H, m, H-7 to H-18 and

H-23 to H-26), 0.89 (3H, t,  $J$  7.0, H-19 or H-27), 0.88 (3H, t,  $J$  7.0, H-19 or H-27);  $^{13}\text{C}$  NMR (151

MHz, CDCl<sub>3</sub>) δ<sub>C</sub> 173.3 (C-4), 172.8 (C-20), 170.3 (C-28), 136.1 (C-31), 129.0 (C-34), 128.8 (C-32 and C-36), 127.3 (C-33 and C-35), 82.5 (C-29), 68.8 (C-2), 62.7 (C-3), 61.9 (C-1), 57.5 (C-30), 34.2 (C-21), 34.1 (C-5), 32.1, 31.8 (C-17, C-25), 29.85, 29.81, 29.77, 29.6, 29.5, 29.4, 29.3, 29.2, 29.1 (C-7 to C-16, C-23, C-24) 24.98, 24.89 (C-6, C-22), 22.84, 22.76 (C-18, C-26), 14.3, 14.2 (C-19, C-27); LRMS *m/z* (ESI<sup>+</sup>) 627.4 ([M+Na]<sup>+</sup>, 100%); HRMS *m/z* (ESI<sup>+</sup>) found 627.4227 [M+Na]<sup>+</sup> (C<sub>36</sub>H<sub>60</sub>O<sub>7</sub>Na requires 627.4231 [M+Na]<sup>+</sup>).

**(-)-(2R)-3-[[ (2R)-2-Methoxy-2-phenylacetyl]oxy]-2-(octanoyloxy)propyl hexadecanoate (-)-S21**

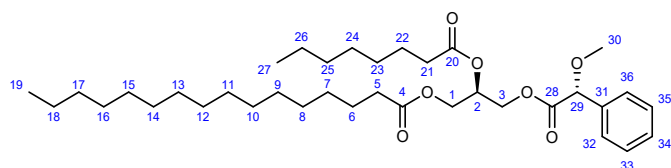

(*R*)-(-)- $\alpha$ -Methoxyphenylacetic acid (5 mg, 0.0310 mmol, 2.0 eq), *N,N'*-dicyclohexylcarbodiimide (10 mg, 0.049 mmol, 2.7 eq) and 4-DMAP (1 mg, 0.008 mmol, 0.5 eq) were added to a solution of (-)-**S14** (7 mg, 0.016 mmol, 1.0 eq) in CH<sub>2</sub>Cl<sub>2</sub> (0.5 mL). After stirring at RT for 4 h, the reaction mixture was diluted with CH<sub>2</sub>Cl<sub>2</sub> (5 mL), and the organic layer was washed with a saturated aqueous solution of NaHCO<sub>3</sub> (2 × 3 mL), and brine (3 mL), then dried over MgSO<sub>4</sub>, filtered, and concentrated *in vacuo*. Purification by column chromatography over silica gel (petroleum ether:Et<sub>2</sub>O, 10:0 to 7:3) gave (-)-**S21** (7 mg, 75%) as a colorless film: *R<sub>f</sub>* 0.77 (petroleum ether:EtOAc, 6:4); [α]<sub>D</sub><sup>25</sup> -27.9 (c 0.58, CHCl<sub>3</sub>); ν<sub>max</sub> (thin film)/cm<sup>-1</sup> 2923, 2853, 1744, 1495, 1164, 1114, 727; <sup>1</sup>H NMR (600 MHz, CDCl<sub>3</sub>) δ<sub>H</sub> 7.44–7.31 (5H, m, H-32 to H-36), 5.24–5.20 (1H, m, H-2), 4.77 (1H, s, H-29), 4.34 (1H, dd, *J* 11.9, 4.0, H-3'), 4.19 (1H, dd, *J* 11.9, 6.3, H-3''), 4.16 (1H, dd, *J* 11.9, 4.5, H-1'), 4.04 (1H, dd, *J* 11.9, 5.8, H-1''), 3.41 (3H, s, H-30), 2.26 (2H, t, *J* 7.6, H-5), 2.23–2.12 (2H, m, H-21), 1.60–1.51 (4H, m, H-6 and H-22), 1.33–1.21 (32H, m, H-7 to H-18 and H-23 to H-26), 0.89 (3H, t, *J* 7.0, H-19 or H-27), 0.88 (3H, t, *J* 7.1, H-19 or H-27); <sup>13</sup>C NMR (151 MHz, CDCl<sub>3</sub>) δ<sub>C</sub> 173.3 (C-4), 172.9 (C-20), 170.4 (C-28), 136.1 (C-31), 129.0 (C-34), 128.8 (C-32

and C-36), 127.3 (C-33 and C-35), 82.5 (C-29), 68.7 (C-2), 63.0 (C-3), 61.9 (C-1), 57.5 (C-30), 34.2 (C-21), 34.1 (C-5), 32.1, 31.8 (C-17, C-25), 29.84, 29.83, 29.80, 29.76, 29.6, 29.5, 29.4, 29.3, 29.2, 29.1 (C-7 to C-16, C-23, C-24), 24.97, 24.90 (C-6, C-22), 22.83, 22.75 (C-18, C-26), 14.3, 14.2 (C-19, C-27); LRMS  $m/z$  (ESI<sup>+</sup>) 627.4 ([M+Na]<sup>+</sup>, 100%); HRMS  $m/z$  (ESI<sup>+</sup> found 627.4229 [M+Na]<sup>+</sup> (C<sub>36</sub>H<sub>60</sub>O<sub>7</sub>Na requires 627.4231 [M+Na]<sup>+</sup>).

**(+)-(2R)-1-[[[(2S)-2-Methoxy-2-phenylacetyl]oxy]-3-(octanoyloxy)propan-2-yl]hexadecanoate (+)-S22**

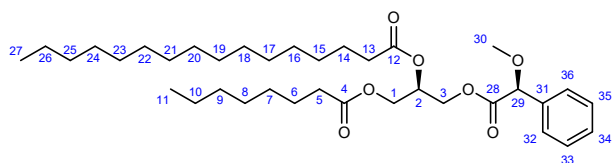

(S)-(+)- $\alpha$ -Methoxyphenylacetic acid (5 mg, 0.03 mmol, 2.0 eq), *N,N'*-dicyclohexylcarbodiimide (10 mg, 0.049 mmol, 2.7 eq) and 4-DMAP (1 mg, 0.008 mmol, 0.5 eq) were added to a solution of (–)-**S15** (7 mg, 0.02 mmol, 1.0 eq) in CH<sub>2</sub>Cl<sub>2</sub> (0.5 mL). After stirring at RT for 4 h, the reaction mixture was diluted with CH<sub>2</sub>Cl<sub>2</sub> (5 mL) and the organic layer was washed with a saturated aqueous solution of NaHCO<sub>3</sub> (2 × 3 mL), brine (3 mL), and then dried over MgSO<sub>4</sub>, before being filtered, and concentrated *in vacuo*. Purification by silica gel column chromatography (petroleum ether:Et<sub>2</sub>O, 10:0 to 7:3) resulted in **(+)-S22** (7 mg, 75%) as a colorless film:  $R_f$  0.77 (petroleum ether:EtOAc, 6:4);  $[\alpha]_D^{25}$  +35.5 (*c* 0.58, CHCl<sub>3</sub>);  $\nu_{\max}$  (thin film)/cm<sup>-1</sup> 2924, 2854, 1744, 1495, 1165, 1114, 728; <sup>1</sup>H NMR (600 MHz, CDCl<sub>3</sub>)  $\delta_H$  7.44–7.31 (5H, m, H-32 to H-36), 5.20–5.15 (1H, m, H-2), 4.77 (1H, s, H-29), 4.35 (1H, dd, *J* 11.9, 4.3, H-3'), 4.22–4.16 (2H, m, H-3'' and H-1'), 3.97 (1H, dd, *J* 11.9, 5.8, H-1''), 3.41 (3H, s, H-30), 2.26 (2H, td, *J* 7.4, 0.9, H-5 or H-13), 2.18 (2H, td, *J* 7.6, 4.1, H-5 or H-13), 1.61–1.50 (4H, m, H-6 and H-14), 1.32–1.22 (32H, m, H-7 to H-10 and H-16 to H-26), 0.88 (6H, t, *J* 6.9, H-11 and H-27); <sup>13</sup>C NMR (151 MHz, CDCl<sub>3</sub>)  $\delta_C$  173.3 (C-4), 172.8 (C-12), 170.3 (C-28), 136.1 (C-31), 129.0 (C-34), 128.8 (C-32 and C-36), 127.3 (C-33 and C-35), 82.5 (C-29), 68.8 (C-2), 62.7 (C-3), 61.9 (C-1), 57.5 (C-30), 34.2, 34.1 (C-5 and C-13), 32.1, 31.8 (C-9 and C-25),

29.84, 29.81, 29.80, 29.78, 29.6, 29.5, 29.4, 29.21, 29.19, 29.0 (C-7, C-8 and C-15 to C-24), 25.0, 24.9 (C-6, C-14), 22.8, 22.7 (C-10, C-26), 14.3, 14.2 (C-27, C-11); LRMS  $m/z$  (ESI<sup>+</sup>) 627.4 ([M+Na]<sup>+</sup>, 100%); HRMS  $m/z$  (ESI<sup>+</sup>) found 627.4229 [M+Na]<sup>+</sup> (C<sub>36</sub>H<sub>60</sub>O<sub>7</sub>Na requires 627.4231 [M+Na]<sup>+</sup>).

**(-)-(2R)-1-[[[(2R)-2-Methoxy-2-phenylacetyl]oxy]-3-(octanoyloxy)propan-2-yl]hexadecanoate (-)-S23**

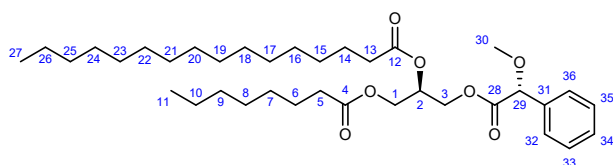

(R)-(-)- $\alpha$ -Methoxyphenylacetic acid (5 mg,

0.03 mmol, 2.0 eq), *N,N'*-

dicyclohexylcarbodiimide (10 mg, 0.049 mmol,

2.7 eq) and 4-DMAP (1 mg, 0.008 mmol, 0.5 eq) were added to a solution of (-)-**S15** (7.0 mg,

0.016 mmol, 1.0 eq) in CH<sub>2</sub>Cl<sub>2</sub> (0.5 mL). After stirring at RT for 4 h, the reaction mixture was

diluted with CH<sub>2</sub>Cl<sub>2</sub> (5 mL), and the organic layer was washed with a saturated aqueous solution

of NaHCO<sub>3</sub> (2 × 3 mL) and brine (3 mL), and then dried over MgSO<sub>4</sub>, filtered, and concentrated

*in vacuo*. Purification by silica gel column chromatography (petroleum ether:Et<sub>2</sub>O, 10:0 to 7:3)

gave (-)-**S23** (8 mg, 81%) as a colorless film:  $R_f$  0.77 (petroleum ether:EtOAc, 6:4);  $[\alpha]_D^{25}$  -31.8 (c

0.67, CHCl<sub>3</sub>);  $\nu_{\max}$  (thin film)/cm<sup>-1</sup> 2925, 2854, 1745, 1457, 1165, 1115, 728; <sup>1</sup>H NMR (600 MHz,

CDCl<sub>3</sub>)  $\delta_H$  7.44–7.31 (5H, m, H-32 to H-36), 5.24–5.20 (1H, m, H-2), 4.77 (1H, s, H-29), 4.34 (1H,

dd,  $J$  11.9, 4.0, H-3'), 4.21–4.15 (2H, m, H-3'' and H-1'), 4.04 (1H, dd,  $J$  11.9, 5.8, H-1''), 3.41 (3H,

s, H-30), 2.26 (2H, t,  $J$  7.6, H-5 or H-13), 2.22–2.12 (2H, m, H-5 or H-13), 1.62–1.50 (4H, m, H-6

and H-14), 1.32–1.23 (32H, m, H-7 to H-10 and H-16 to H-26), 0.88 (6H, t,  $J$  6.9, H-11 and H-27);

<sup>13</sup>C NMR (151 MHz, CDCl<sub>3</sub>)  $\delta_C$  173.3 (C-4), 172.9 (C-12), 170.4 (C-28), 136.1 (C-31), 129.0 (C-

34), 128.8 (C-32 and C-36), 127.3 (C-33 and C-35), 82.5 (C-29), 68.7 (C-2), 63.0 (C-3), 61.9 (C-

1), 57.5 (C-30), 34.2, 34.1 (C-5, C-13), 32.1, 31.8 (C-9, C-25), 29.84, 29.81, 29.80, 29.78, 29.6,

29.5, 29.4, 29.22, 29.19, 29.0 (C-7, C-8 and C-15 to C-24), 25.0, 24.9 (C-6, C-14), 22.8, 22.7 (C-

10, C-26), 14.3, 14.2 (C-11, C-27); LRMS  $m/z$  (ESI<sup>+</sup>) 627.4 ([M+Na]<sup>+</sup>, 100%); HRMS  $m/z$  (ESI<sup>+</sup>) found 627.4228 [M+Na]<sup>+</sup> (C<sub>36</sub>H<sub>60</sub>O<sub>7</sub>Na requires 627.4231 [M+Na]<sup>+</sup>).

**(+)-(S)-3-(Bis(4-methoxyphenyl)(phenyl)methoxy)-2-((3-(3-(dodec-11-yn-1-yl)-3H-diazirin-3-yl)propanoyl)oxy)propyl palmitate S24**

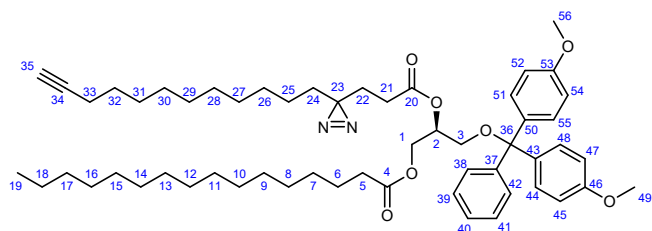

To a solution of alcohol **S10** (684 mg, 1.08 mmol, 1.0 eq) in CH<sub>2</sub>Cl<sub>2</sub> (6 mL) was added DCC (446 mg, 2.16 mmol, 2.0 eq), 4-DMAP (8 mg, 0.1 mmol, 0.06 eq) and

diazirine **27** (300 mg, 1.08 mmol, 1.0 eq). The solution was stirred at RT for 18 h, after which the reaction mixture was diluted with hexane (20 mL). The suspension was filtered through celite, and the celite subsequently was washed with hexane (3 × 10 mL). The combined filtrates were concentrated *in vacuo* at RT and the resulting residue was purified by column chromatography over silica gel (petroleum ether:Et<sub>2</sub>O, 10:0 to 8:2) which yielded (+)-**S24** (400 mg, 41%) as a colorless oil with a slight impurity corresponding to the migration product:  $R_f$  0.49 (petroleum ether:EtOAc, 9:1);  $[\alpha]_D^{25} +10.66$  (c 1.0, CHCl<sub>3</sub>);  $\nu_{\max}$  (thin film)/cm<sup>-1</sup> 3309, 2925, 2854, 1742, 1608, 1509, 1251, 1177, 1037, 829; <sup>1</sup>H NMR (600 MHz, CDCl<sub>3</sub>)  $\delta_H$  7.43–7.38 (2 H, m, H-38, H-42), 7.31–7.26 (6 H, m, H-39, H-41, H-44, H-48, H-51, H-55), 7.23–7.19 (1 H, m, H-40), 6.84–6.80 (4 H, m, H-45, H-47, H-52, H-54), 5.27–5.21 (1 H, m, H-2), 4.34 (1 H, dd,  $J$  11.9, 3.6, H-1'), 4.22 (1 H, dd,  $J$  11.9, 6.6, H-1''), 3.79 (6 H, s, H-49, H-56), 3.22 (2 H, dd,  $J$  5.0, 2.5, H-3), 2.24 (2 H, t,  $J$  7.6, H-5), 2.17 (2 H, td,  $J$  7.1, 2.6, H-33), 2.12 (2 H, td,  $J$  7.6, 2.8, H-21 or H-22), 1.93 (1 H, t,  $J$  2.6, H-35), 1.75–1.70 (2 H, m, H-21 or H-22), 1.56–1.49 (4 H, m, H-6 and H-32), 1.40–1.35 (4 H, m, H-24, H-31), 1.33–1.18 (34 H, m, H-30 to H-26 and H-18 to H-7), 1.10–1.03 (2 H, m, H-25), 0.88 (3 H, t,  $J$  7.0, H-19); <sup>13</sup>C NMR (151 MHz, CDCl<sub>3</sub>)  $\delta_C$  173.6 (C-4), 171.7 (C-20), 158.7 (C-46 and C-53), 144.7 (C-37), 135.83, 135.81 (C-43, C-50), 130.13, 130.12 (C-44, C-48, C-51, C-55), 128.2, 128.0 (C-38, C-39, C-41, C-42), 127.0 (C-40), 113.3 (C-52, C-54, C-45 and C-47), 86.3 (C-36), 84.9 (C-34), 71.2 (C-2), 68.2 (C-35), 62.9 (C-1), 62.0 (C-3), 55.3 (C-56 and C-49), 34.2 (C-5),

32.9 (C-24), 32.1, 29.85, 29.81, 29.80, 29.78, 29.64, 29.60, 29.56, 29.55, 29.50, 29.43, 29.42, 29.31, 29.28, 29.22, 29.20, 28.9 (C-7 to C-17, C-20, C-26 to C-31) 28.8, 28.6, 28.4 (C-21, C-22, C-32), 28.3 (C-23), 25.0 (C-6), 24.0 (C-25), 22.8 (C-18), 18.5 (C-33), 14.3 (C-19); LRMS  $m/z$  (ESI<sup>+</sup>) 915.6 ([M+Na]<sup>+</sup>, 100%); HRMS  $m/z$  (ESI<sup>+</sup>) found 915.5853 [M+Na]<sup>+</sup> (C<sub>56</sub>H<sub>80</sub>O<sub>7</sub>N<sub>2</sub>Na) requires 915.5858 [M+Na]<sup>+</sup>.

**(R)-2-((3-(3-(dodec-11-yn-1-yl)-3H-diazirin-3-yl)propanoyl)oxy)-3-((S)-2-methoxy-2-phenylacetoxy)propyl palmitate (+)-S25**

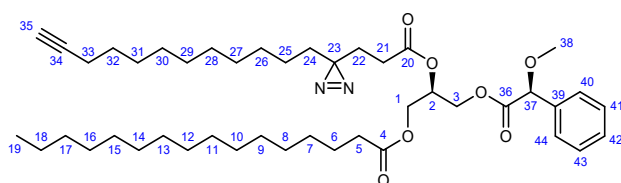

(S)-(+)- $\alpha$ -Methoxyphenylacetic acid (6 mg, 0.04 mmol, 2.2 eq), *N,N'*-dicyclohexylcarbodiimide (10 mg, 0.046 mmol, 2.7 eq) and 4-DMAP (1 mg, 0.008 mmol, 0.5

eq) were added to a solution of alcohol **32** (10 mg, 0.017 mmol, 1 eq) in CH<sub>2</sub>Cl<sub>2</sub> (0.5 mL). After stirring at RT for 16 h, the reaction mixture was diluted with CH<sub>2</sub>Cl<sub>2</sub> (5 mL), the organic layer was washed with 1 M HCl<sub>(aq)</sub> (5 mL), then a saturated aqueous solution of NaHCO<sub>3</sub> (5 mL) and then brine (5 mL), and then dried over Na<sub>2</sub>SO<sub>4</sub>, filtered, and concentrated *in vacuo*. Purification by silica gel column chromatography (petroleum ether:Et<sub>2</sub>O, 10:0 to 7:3) gave **(+)-25** (8 mg, 65%) as a colorless film:  $R_f$  0.63 (petroleum ether:Et<sub>2</sub>O, 6:4);  $[\alpha]_D^{25} +33.1$  ( $c$  0.8, CHCl<sub>3</sub>);  $\nu_{\max}$  (thin film)/cm<sup>-1</sup> 3313, 2928, 2855, 1748, 1466, 1171; <sup>1</sup>H NMR (600 MHz, CDCl<sub>3</sub>)  $\delta_H$  7.47–7.31 (5 H, m, H-40 to H-44), 5.19–5.11 (1 H, m, H-2), 4.78 (1 H, s, H-37), 4.37 (1 H, dd,  $J$  12.0, 4.1, m, H-3'), 4.22–4.16 (2 H, m, H-3'', H-1'), 3.96 (1 H, dd,  $J$  12.0, 5.8, H-1''), 3.40 (3 H, s, H-38), 2.27 (2 H, t,  $J$  7.6, H-5), 2.17 (2 H, td,  $J$  7.2, 2.7, H-33), 1.98–1.92 (3 H, m, H-21, H-35), 1.66–1.61 (2 H, m, H-22), 1.60–1.54 (2 H, m, H-6), 1.54–1.49 (2 H, m, H-32), 1.41–1.33 (4 H, m, H-24, H-31), 1.32–1.18 (34 H, m, H-7 to H-18 and H-26 to H-30), 1.10–1.02 (2 H, m, H-25), 0.88 (3 H, t,  $J$  7.0, H-19); <sup>13</sup>C NMR (151 MHz, CDCl<sub>3</sub>)  $\delta_C$  173.3 (C-4), 171.4 (C-20), 170.3 (C-36), 136.1 (C-39), 129.1 (C-42), 128.9,

127.3 (C-40, C-41, C-43, C-44), 84.9 (C-34), 82.4 (C-37), 69.3 (C-2), 68.2 (C-35), 62.5 (C-3), 61.8 (C-1), 57.5 (C-38), 34.1 (C-5), 32.8 (C-24), 32.1, 29.9, 29.84, 29.81, 29.77, 29.62, 29.56, 29.53, 29.51, 29.4, 29.3, 29.3, 29.2, 28.9, 28.6 (C-7 to C-17 and C-25 to C-32), 28.5 (C-21), 28.2 (C-23), 28.1 (C-22), 25.0 (C-6), 23.9 (C-29), 22.8 (C-18), 18.5 (C-33), 14.3 (C-19); HRMS  $m/z$  (ESI<sup>+</sup>) found 761.5106 [M+Na]<sup>+</sup> (C<sub>44</sub>H<sub>70</sub>O<sub>7</sub>N<sub>2</sub>Na) requires 761.5075[M+Na]<sup>+</sup>.

**(R)-2-((3-(3-(Dodec-11-yn-1-yl)-3H-diazirin-3-yl)propanoyl)oxy)-3-((R)-2-methoxy-2-phenylacetoxy)propyl palmitate (-)-S26**

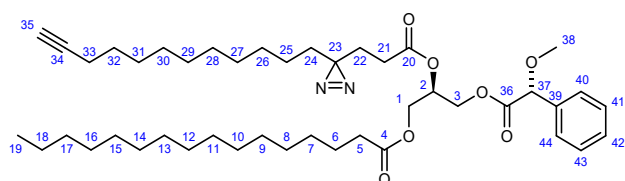

(R)-(-)- $\alpha$ -Methoxyphenylacetic acid (6 mg, 0.04 mmol, 2.2 eq), *N,N'*-dicyclohexylcarbodiimide (10 mg, 0.046

mmol, 2.7 eq) and 4-DMAP (1 mg, 0.008 mmol, 0.5 eq) were added to a solution of alcohol **32** (10 mg, 0.017 mmol, 1.0 eq) in CH<sub>2</sub>Cl<sub>2</sub> (0.5 mL). After stirring at RT for 16 h, the reaction mixture was diluted with CH<sub>2</sub>Cl<sub>2</sub> (5 mL), and the organic layer was washed with 1 M HCl<sub>(aq)</sub> (5 mL), a saturated aqueous solution of NaHCO<sub>3</sub> (5 mL), then brine (5 mL), and then dried over Na<sub>2</sub>SO<sub>4</sub>, filtered, and concentrated *in vacuo*. Purification using silica gel column chromatography (petroleum ether:Et<sub>2</sub>O, 10:0 to 7:3) gave **(-)-S26** (10 mg, 82%) as a colorless film:  $R_f$  0.63 (petroleum ether:Et<sub>2</sub>O, 6:4);  $[\alpha]_D^{25}$  -24.0 (c 1.0, CHCl<sub>3</sub>);  $\nu_{\max}$  (thin film)/cm<sup>-1</sup> 3312, 2928, 2855, 1749, 1466, 1171; <sup>1</sup>H NMR (600 MHz, CDCl<sub>3</sub>)  $\delta_H$  7.44–7.32 (5 H, m, H-40 to H-44), 5.22–5.18 (1 H, m, H-2), 4.77 (1 H, s, H-37), 4.33 (1 H, dd,  $J$  11.9, 4.0, H-3'), 4.19 (1 H, dd,  $J$  11.5, 5.8, H-3''), 4.16 (1 H, dd,  $J$  11.5, 4.0, H-1'), 4.03 (1 H, dd,  $J$  11.9, 5.8, H-1''), 3.41 (3 H, s, H-38), 2.26 (2 H, t,  $J$  7.6, H-5), 2.18 (2 H, td,  $J$  7.2, 2.7, H-33), 2.00–1.88 (3 H, m, H-35 and H-21), 1.69–1.60 (2 H, m, H-22), 1.61–1.53 (2 H, m, H-6), 1.56–1.48 (2 H, m, H-32), 1.42–1.32 (4 H, m, H-24 and H-31), 1.30–1.19 (34 H, m, H-7 to H-18 and H-26 to H-30), 1.09–1.03 (2 H, m, H-25), 0.88 (3 H, t,  $J$  7.0, H-19); <sup>13</sup>C NMR (151 MHz, CDCl<sub>3</sub>)  $\delta_C$  173.3 (C-4), 171.4 (C-20), 170.4 (C-36), 136.1 (C-39), 129.1

(C-42), 128.9, 127.3 (C-40, C-41, C-43, C-44), 84.9 (C-34), 82.4 (C-37), 69.3 (C-2), 68.2 (C-35), 62.8 (C-3), 61.8 (C-1), 57.6 (C-38), 34.1 (C-5), 32.8 (C-24), 32.1, 29.9, 29.84, 29.81, 29.77, 29.62, 29.57, 29.5, 29.4, 29.32, 29.25, 29.21, 28.9, 28.6 (C-7 to C-17 and C-25 to C-32), 28.5 (C-21), 28.18 (C-23), 28.15 (C-22), 25.0 (C-6), 24.0 (C-29), 22.8 (C-18), 18.5 (C-33), 14.3 (C-19); HRMS  $m/z$  (ESI<sup>+</sup>) found 761.5094 [M+Na]<sup>+</sup> (C<sub>44</sub>H<sub>70</sub>O<sub>7</sub>N<sub>2</sub>Na) requires 761.5075[M+Na]<sup>+</sup>.

# NMR Spectra and Other Data

1D-1-O-Acetate-2,3-O-cyclopentylidene-4,6-di-O-(4-methoxybenzyl)-5-O-(2-oxo-5,6-benzo-1,3,2-dioxaphosphep-2-yl)-myo-inositol (-)-18 <sup>1</sup>H NMR

Current Data Parameters  
 NAME gb653390802  
 EXPNO 1  
 PROCNO 1

F2 - Acquisition Parameters  
 Date 20220208  
 Time 21.07 h  
 INSTRUM Avance  
 PROBHD Z159656\_0020 ( )  
 PULPROG zg30  
 TD 65536  
 SOLVENT CDCl3  
 NS 16  
 DS 2  
 SWH 11904.762 Hz  
 FIDRES 0.363304 Hz  
 AQ 2.7525120 sec  
 RG 84.3283  
 DW 42.000 usec  
 DE 22.00 usec  
 TE 298.0 K  
 D1 1.00000000 sec  
 TD0 1  
 SFO1 600.4230021 MHz  
 NUC1 <sup>1</sup>H  
 PC 4.00 usec  
 P1 12.00 usec  
 PLW1 13.51200008 W

F2 - Processing parameters  
 SI 65536  
 SF 600.4200137 MHz  
 WDW EM  
 SSB 0  
 LB 0.30 Hz  
 GB 0  
 PC 1.00

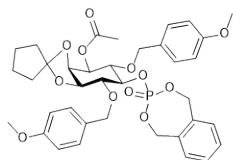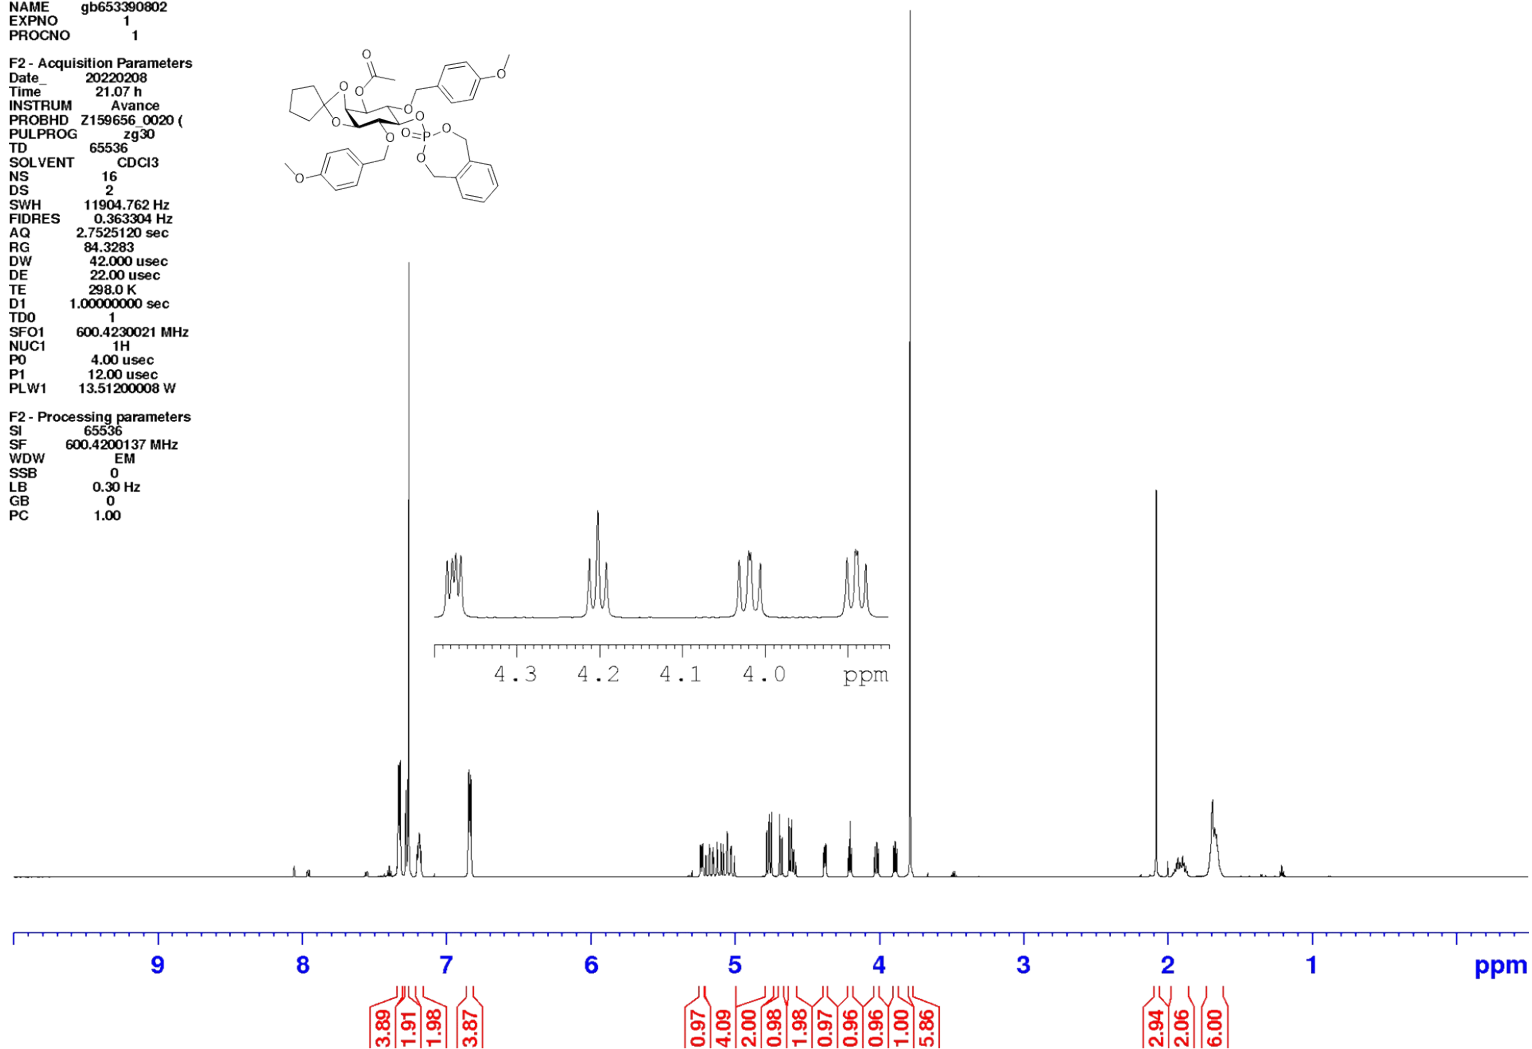

# 1D-1-O-Acetate-2,3-O-cyclopentylidene-4,6-di-O-(4-methoxybenzyl)-5-O-(2-oxo-5,6-benzo-1,3,2-dioxaphosphep-2-yl)-myo-inositol (-)-18 <sup>31</sup>P NMR

Current Data Parameters  
NAME gbr3330802  
EXPNO 6  
PROCNO 1

F2 - Acquisition Parameters  
Date\_ 20220208  
Time 23.33 h  
INSTRUM Avance  
PROBHD Z159656\_002D (1  
PULPROG zgpg30  
TD 65536  
SOLVENT CDCl3  
NS 16  
DS 4  
SWH 48943.688 Hz  
FIDRES 1.481436 Hz  
AQ 0.6750208 sec  
RG 101  
DW 10.300 usec  
DE 18.00 usec  
TE 298.0 K  
D1 2.0000000 sec  
D11 0.03000000 sec  
TD0 1  
SFO1 243.0423184 MHz  
NUC1 31P  
FO 4.00 usec  
F1 12.00 usec  
PLM1 39.4080000 W  
SFO2 600.4224017 MHz  
NUC2 1H  
CDEPRG(2) Waltz16  
PCPD2 80.00 usec  
PLM2 13.5120000 W  
PLM12 0.10124050 W  
PLM13 0.13098180 W

F2 - Processing parameters  
SI 32768  
SF 243.0544711 MHz  
WDW EM  
SSB 0  
LB 1.00 Hz  
GB 0  
PC 1.40

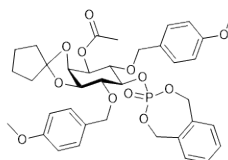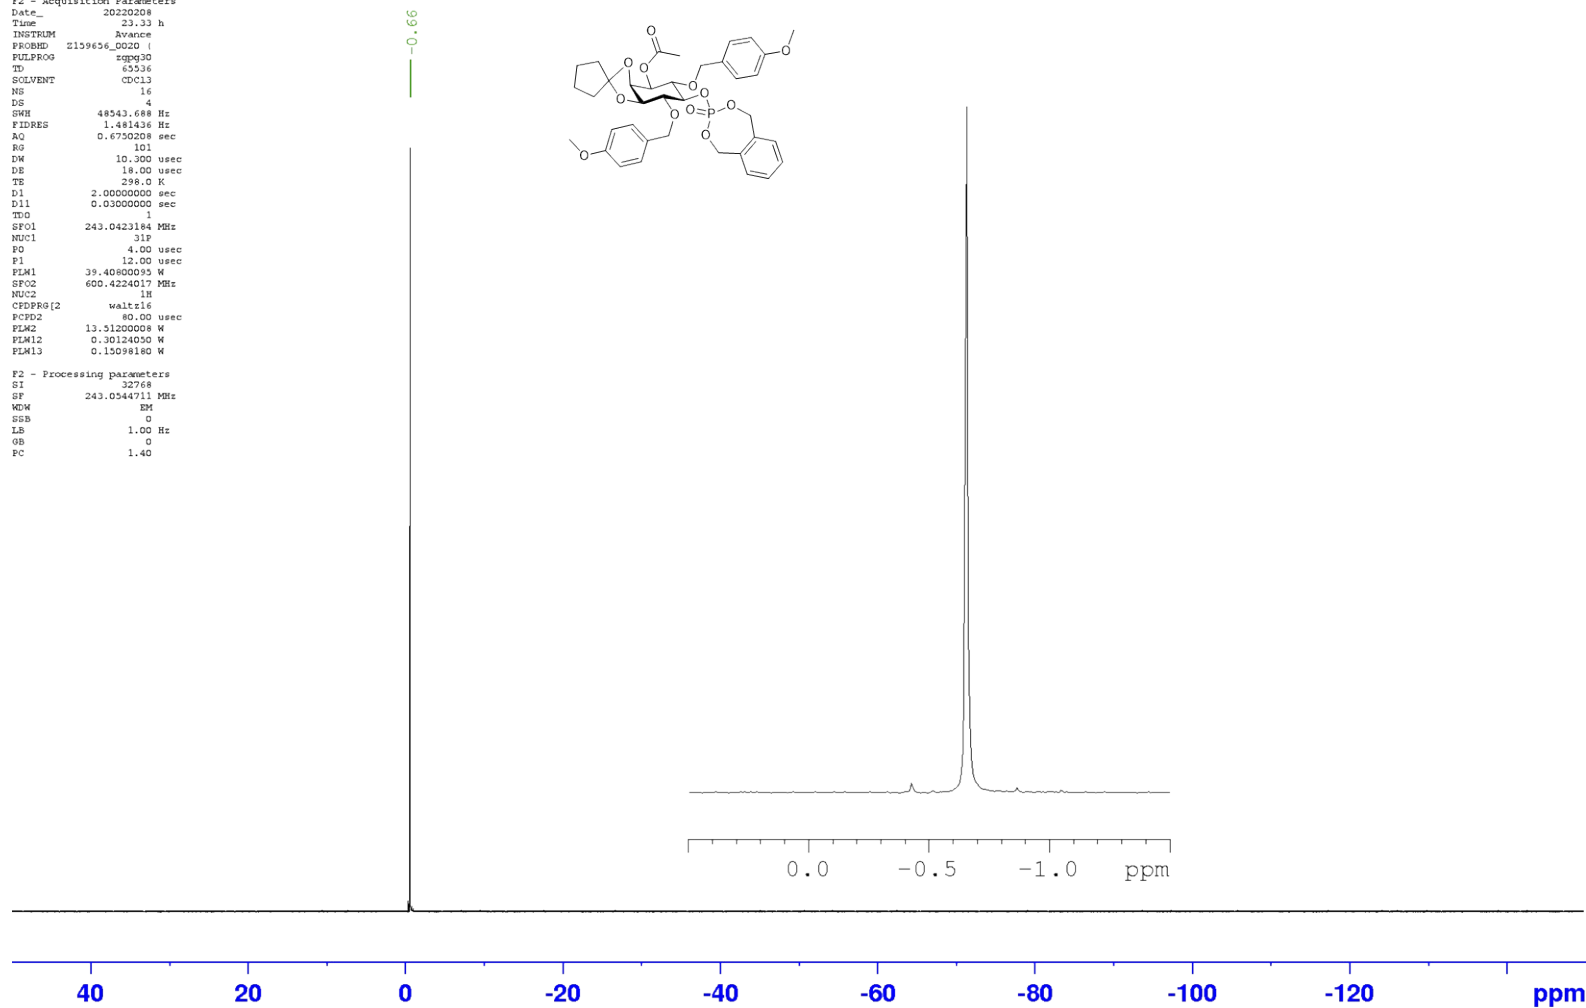

1D-1-O-Acetate-2,3-O-cyclopentylidene-4,6-di-O-(4-methoxybenzyl)-5-O-(2-oxo-5,6-benzo-1,3,2-dioxaphosphep-2-yl)-myo-inositol (-)-18 <sup>13</sup>C NMR

```

Current Data Parameters
NAME      g053330802
EXPNO     5
PROCNO    1

F2 - Acquisition Parameters
Date_     20220208
Time      23.31 h
INSTRUM   Avance
PROBHD    z159656_002D (
PULPROG   zgpg30
TD        65536
SOLVENT   CDCl3
NS        2048
DS        4
SWE       35714.285 Hz
FIDRES    1.089913 Hz
AQ         0.9175040 sec
RG         101
DM         14.000 usec
DE         18.00 usec
TE         298.0 K
D1         2.00000000 sec
D11        0.03000000 sec
TD0        1
SFO1       150.9908267 MHz
NUC1       13C
FO         3.33 usec
F1         10.00 usec
PLM1       41.91400146 W
SFO2       600.4224017 MHz
NUC2       1H
CFDPRG(2) waltz16
PCPD2      80.00 usec
PLM2       13.51200008 W
PLM12      0.30124050 W
PLM13      0.15098180 W

F2 - Processing parameters
SI         65536
SF         150.9757084 MHz
WDW        EM
SSB        0
LB         1.00 Hz
GB         0
PC         1.40
    
```

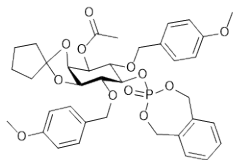

170.13  
159.35  
159.34  
135.49  
135.45  
130.32  
130.23  
129.81  
129.63  
129.07  
129.04  
128.85  
120.12  
113.84  
113.76

80.84  
80.79  
78.90  
78.88  
77.67  
77.64  
77.58  
73.95  
73.71  
72.85  
70.47  
68.46  
68.44  
68.42  
68.40  
55.41  
36.85  
36.66  
24.10  
23.46  
21.21

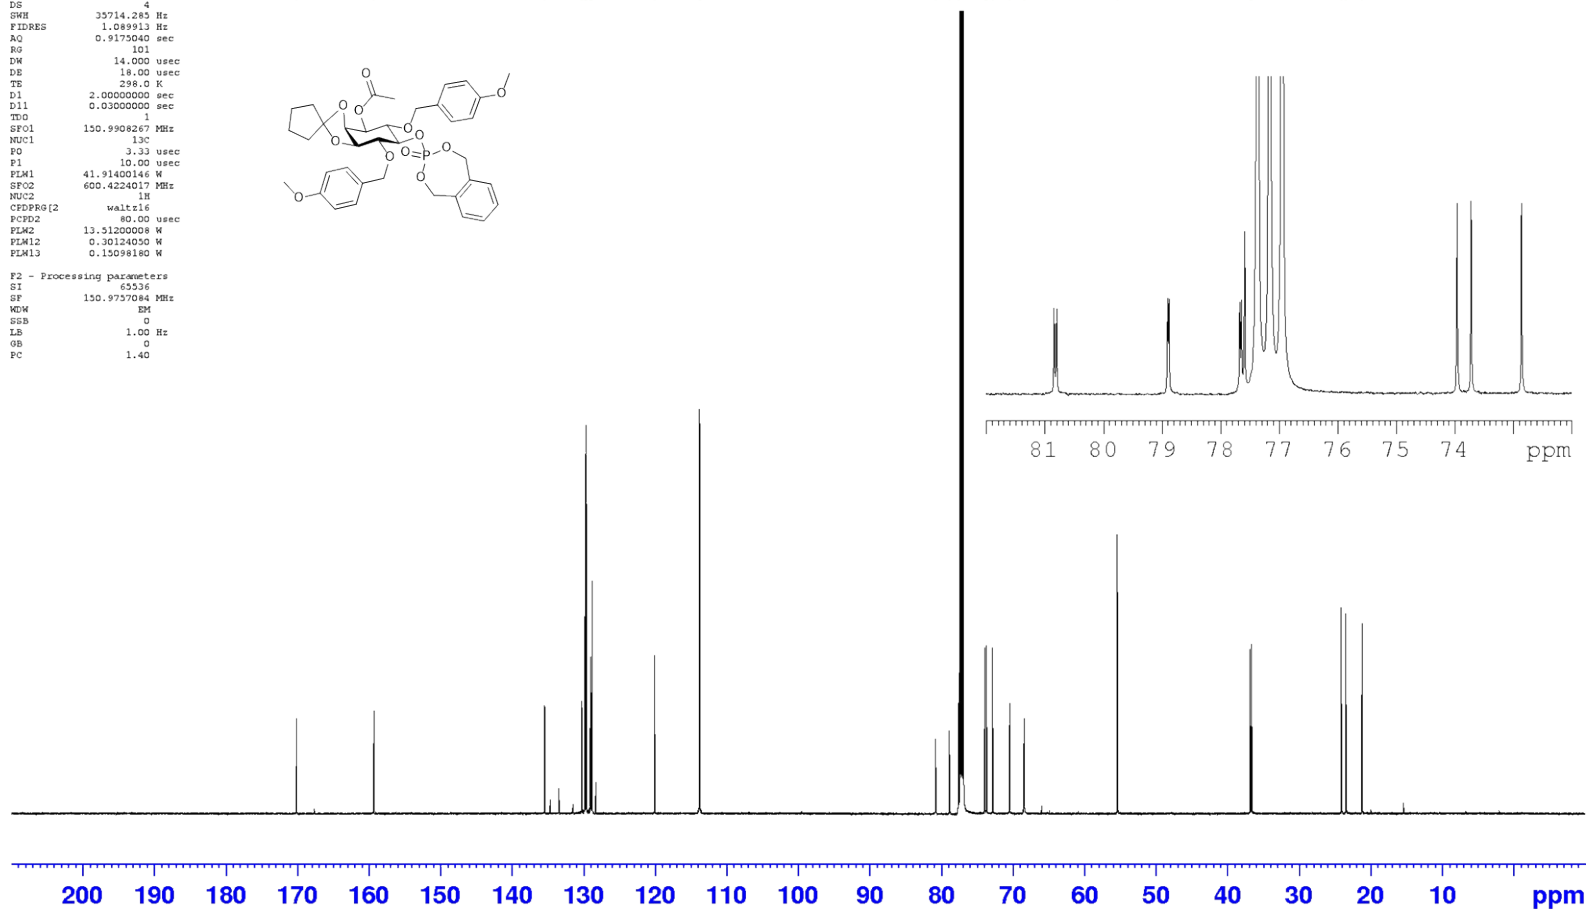

**1D-1-O-Acetate-2,3-O-cyclopentylidene-4,6-di-O-(4-methoxybenzyl)-5-O-(2-oxo-5,6-benzo-1,3,2-dioxaphosph-2-yl)-myo-inositol (-)-18 HRMS**

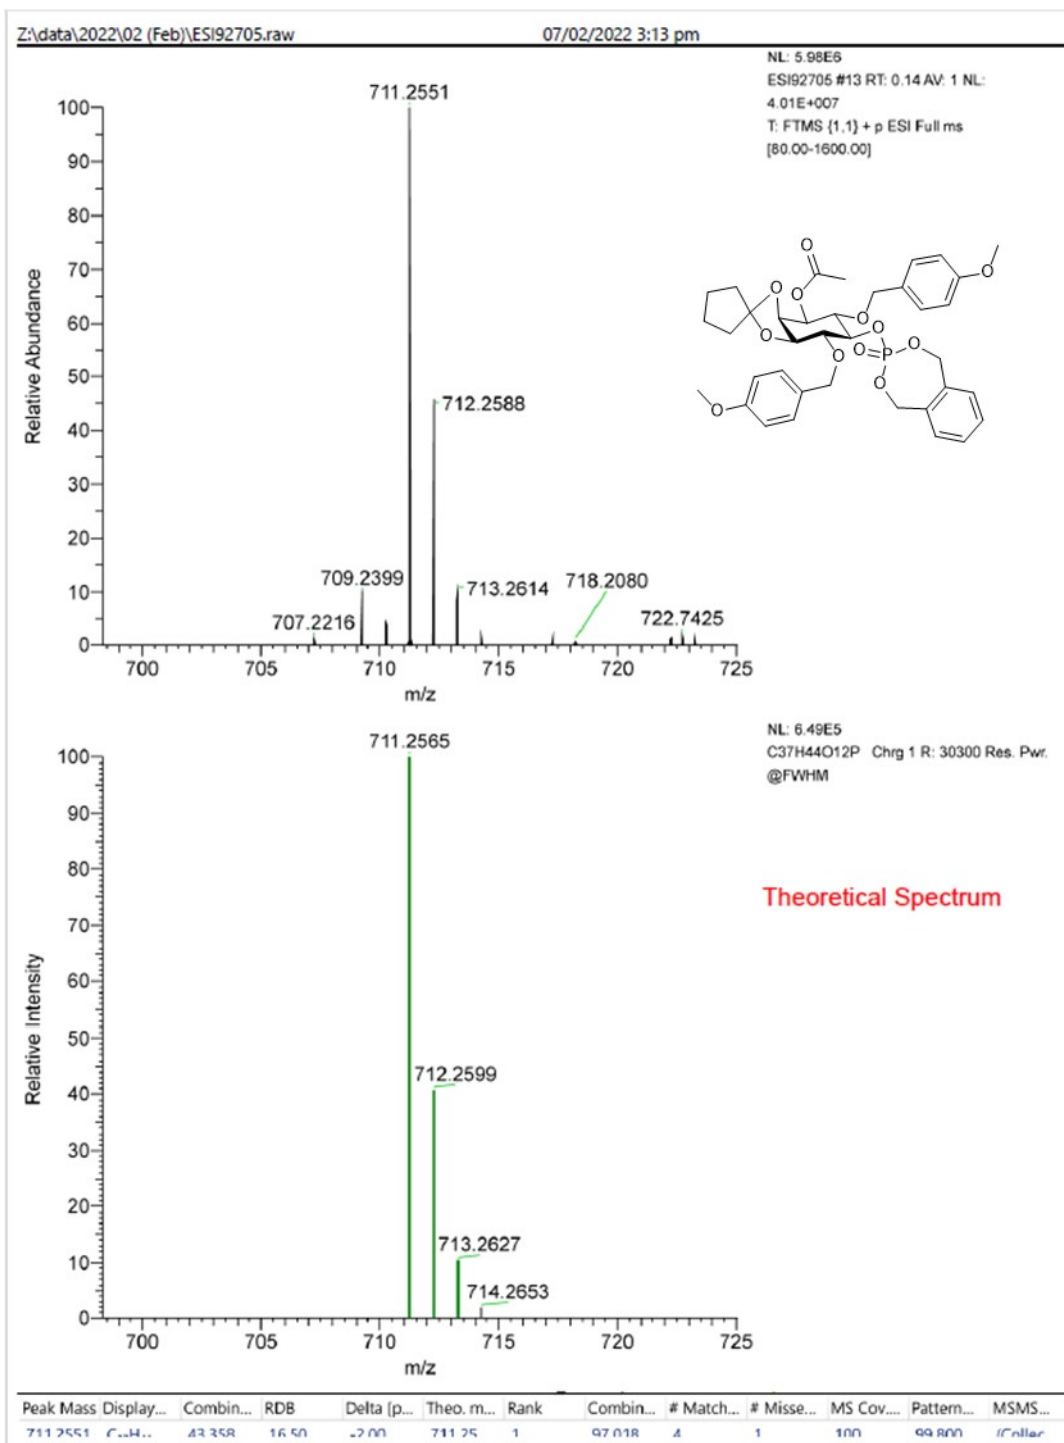

1D-2,3-O-Cyclopentylidene-4,6-di-O-(4-methoxybenzyl)-5-O-(2-oxo-5,6-benzo-1,3,2-dioxaphosphep-2-yl)-myo-inositol (+)-19 <sup>1</sup>H NMR

Current Data Parameters  
 NAME gb654340103  
 EXPNO 1  
 PROCNO 1

F2 - Acquisition Parameters  
 Date 20220301  
 Time 18.10 h  
 INSTRUM Avance  
 PROBHD Z159656\_0020 (Z159656)  
 PULPROG zg30  
 TD 65536  
 SOLVENT CDCl3  
 NS 16  
 DS 2  
 SWH 11904.762 Hz  
 FIDRES 0.363304 Hz  
 AQ 2.7525120 sec  
 RG 76.1298  
 DW 42.000 usec  
 DE 22.00 usec  
 TE 298.0 K  
 D1 1.00000000 sec  
 TDO 1  
 SFO1 600.4230021 MHz  
 NUC1 1H  
 PO 4.00 usec  
 P1 12.00 usec  
 PLW1 13.51200008 W

F2 - Processing parameters  
 SI 65536  
 SF 600.4200137 MHz  
 WDW EM  
 SSB 0  
 LB 0.30 Hz  
 GB 0  
 PC 1.00

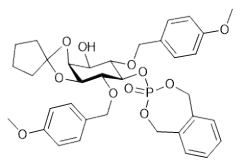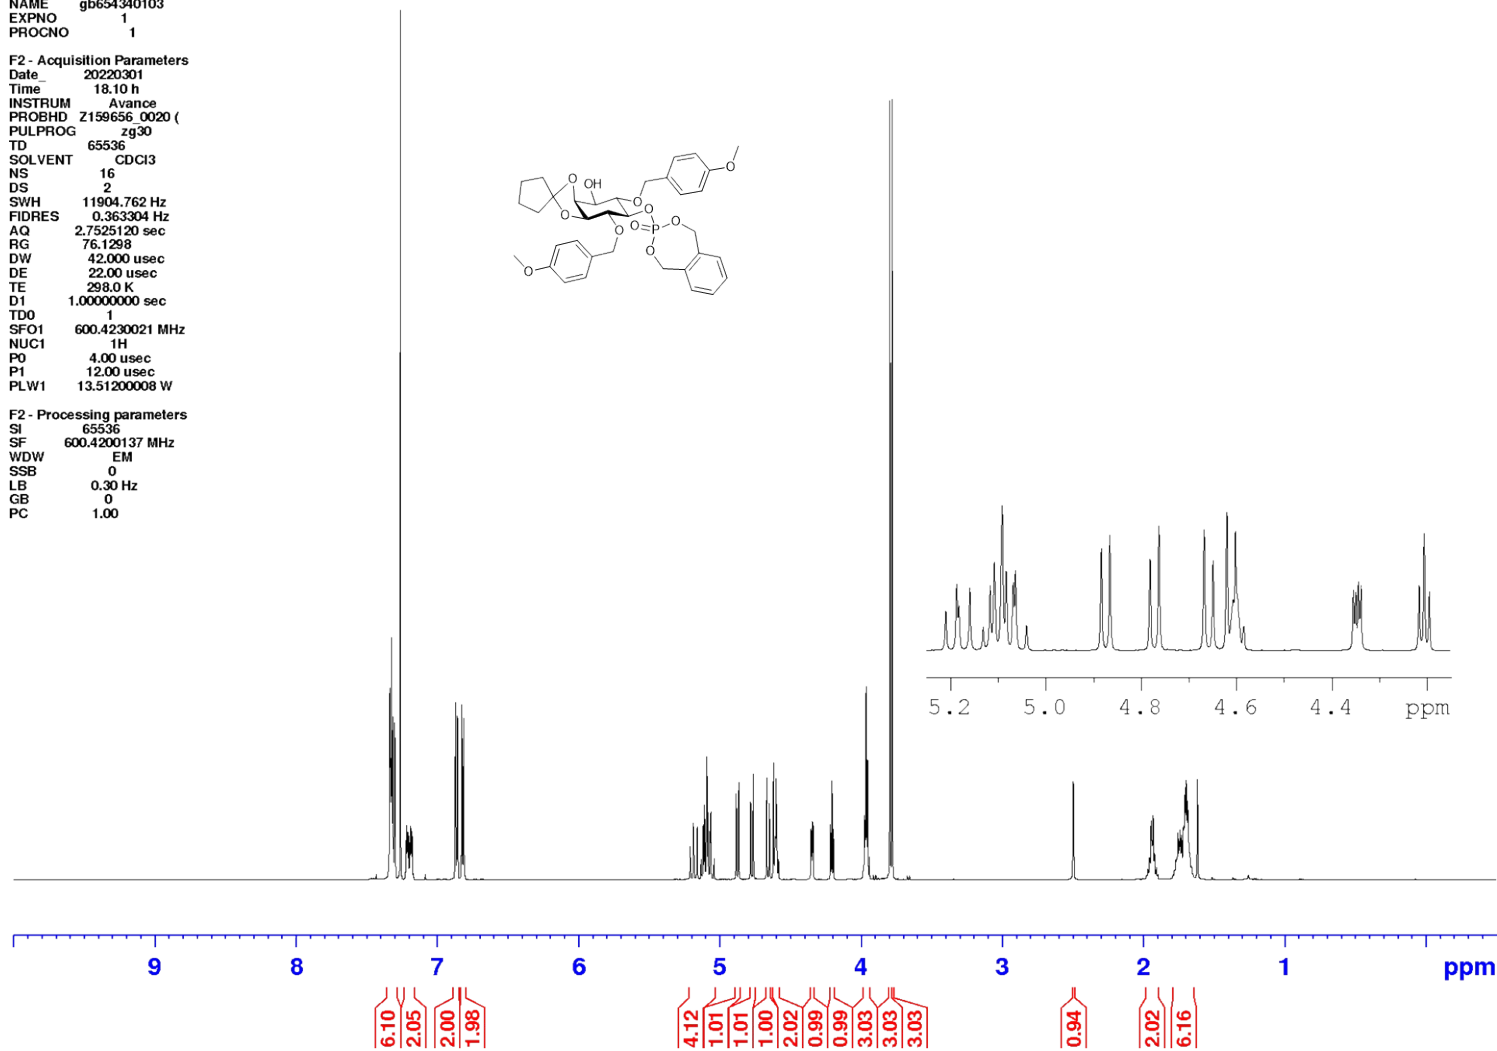



# 1D-2,3-O-Cyclopentylidene-4,6-di-O-(4-methoxybenzyl)-5-O-(2-oxo-5,6-benzo-1,3,2-dioxaphosphep-2-yl)-myo-inositol (+)-19 <sup>13</sup>C NMR

```

Current Data Parameters
NAME          g0534340103
EXPNO         5
PROCNO        1

F2 - Acquisition Parameters
Date_         20220301
Time          19.44 h
INSTRUM       Avance
PROBHD        z159656_0020 (
PULPROG       zgpg30
TD            65536
SOLVENT       CDCl3
NS            1024
DS            4
SHE          35714.285 Hz
FIDRES        1.089913 Hz
AQ            0.9175040 sec
RG            101
DM            14.000 usec
DE            18.00 usec
TE            298.0 K
D1            2.0000000 sec
D11           0.0300000 sec
TD0           1
SFO1          150.9908267 MHz
NUC1          13C
FO            3.33 usec
F1            10.00 usec
PLM1          41.91400146 W
SFO2          600.4224017 MHz
NUC2          1H
CFDPRG[2]    waltz16
PCPD2         80.00 usec
PLM2          13.51200008 W
PLM12         0.30124050 W
PLM13         0.15098180 W

F2 - Processing parameters
SI            65536
SF            150.9757098 MHz
WDW           EM
SSB           0
LB            1.00 Hz
GB            0
PC            1.40
    
```

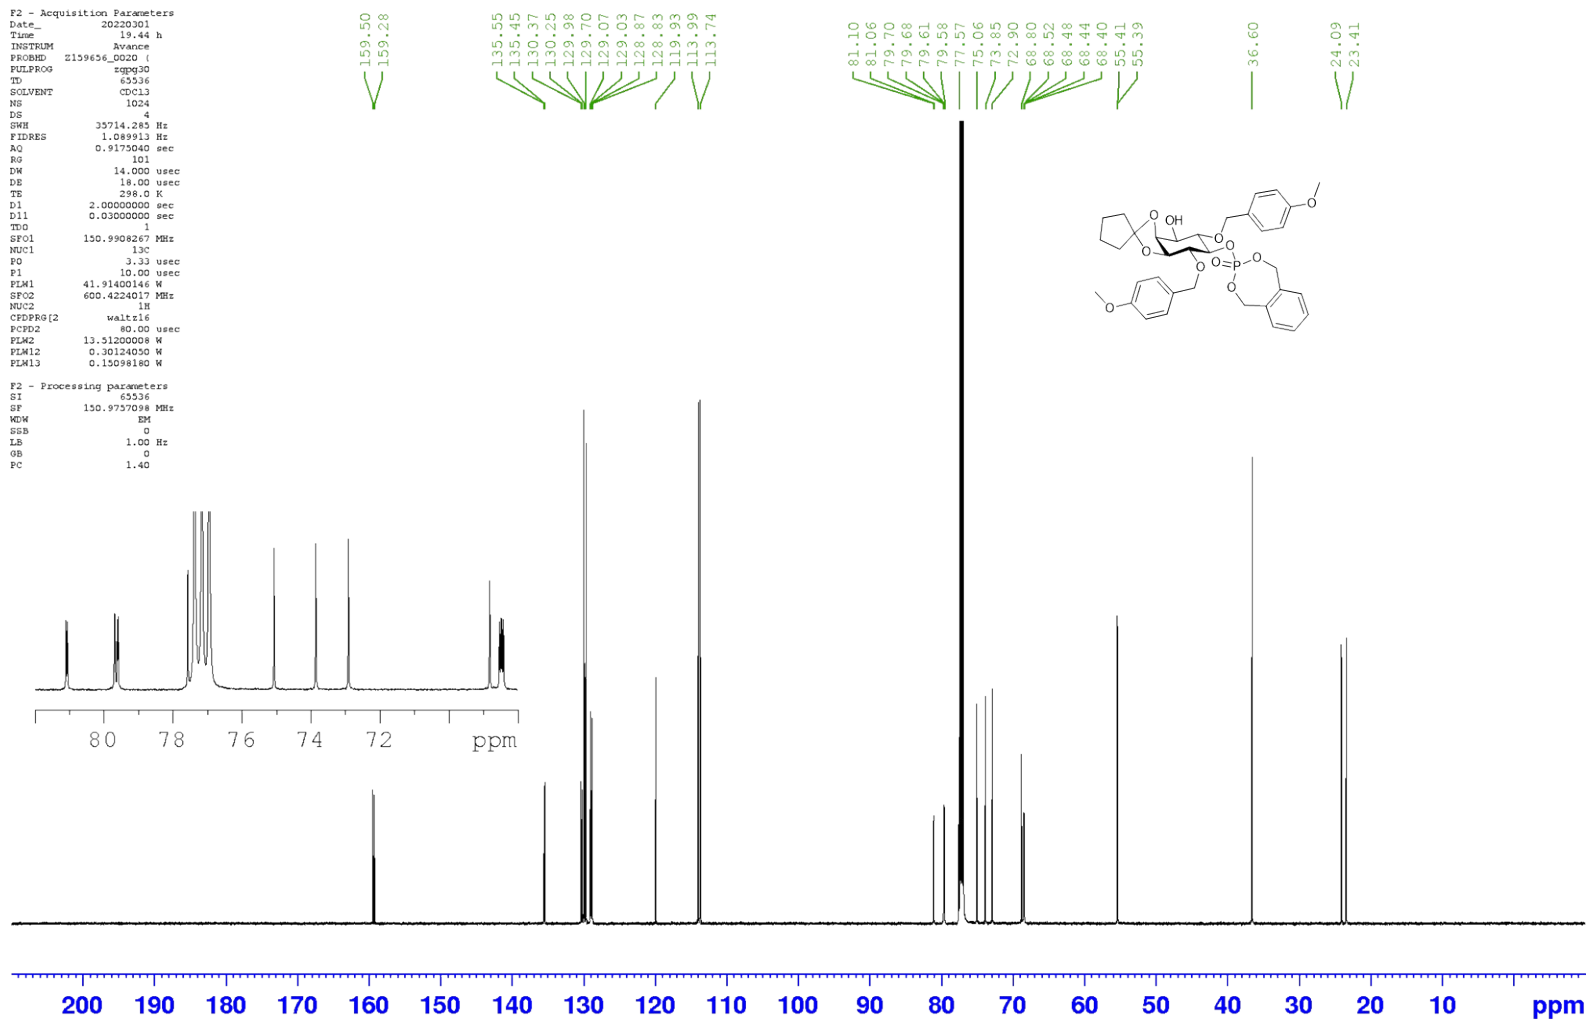

**1D-2,3-O-Cyclopentylidene-4,6-di-O-(4-methoxybenzyl)-5-O-(2-oxo-5,6-benzo-1,3,2-dioxaphosph-2-yl)-*myo*-inositol (+)-19 HRMS**

**Expanded Spectrum RT 0.10, NL 2842247, Peak [1], Target Mass 669.2459**

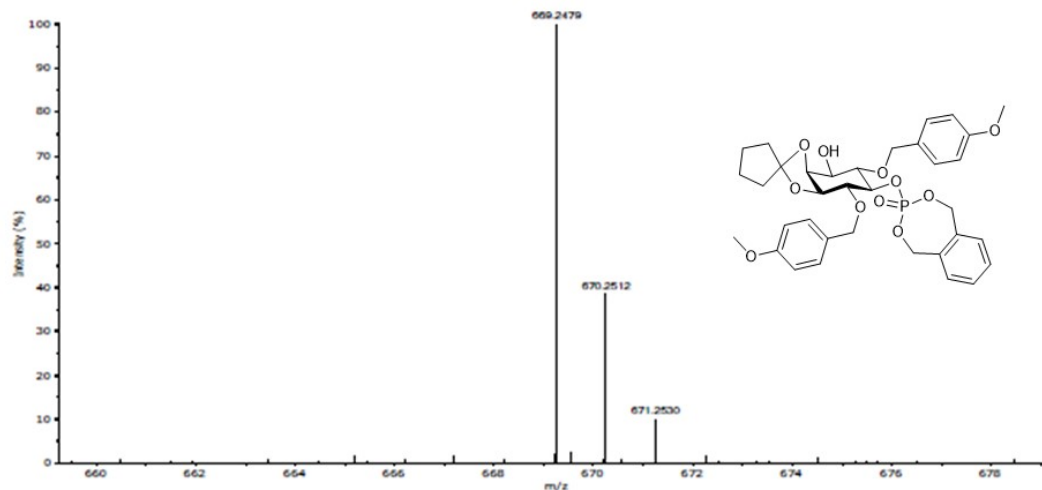

**Theoretical Spectrum for C<sub>35</sub>H<sub>42</sub>O<sub>11</sub>P, Minimum Abundance 0.01%**

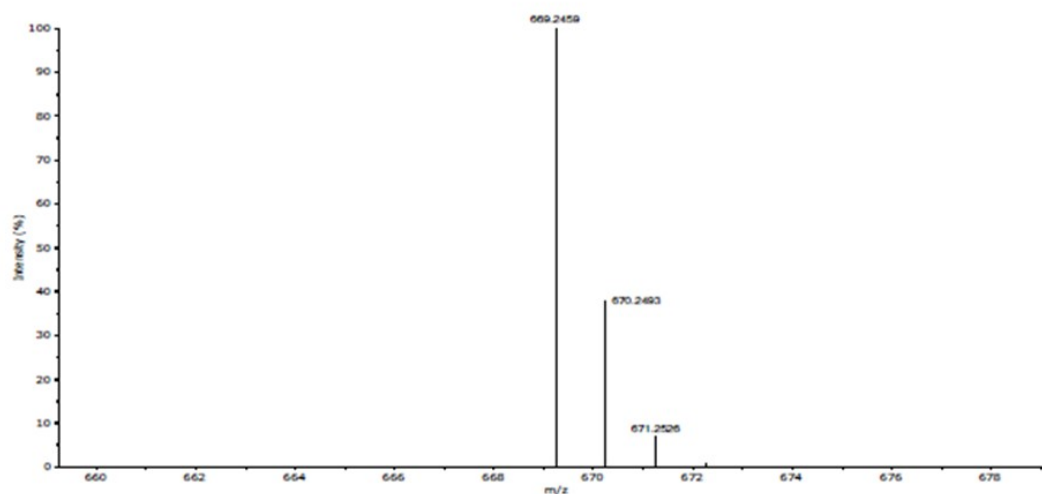

| Measured Mass | Calculated Mass | Error (mDa) | Error (ppm) | Formula [M+H] <sup>+</sup>                        | Response |
|---------------|-----------------|-------------|-------------|---------------------------------------------------|----------|
| 669.2479      | 669.2459        | 1.97        | 2.94        | C <sub>35</sub> H <sub>42</sub> O <sub>11</sub> P | 2534295  |

# 13-{{tetrahydropyran-2'-yl)oxy}tridecan-1-yne 22 <sup>1</sup>H NMR

Current Data Parameters  
NAME Aug05-2021-24-GB-099 (12-tridec  
EXPNO 1  
PROCNO 1

F2 - Acquisition Parameters  
Date\_ 20210805  
Time 9.47 h  
INSTRUM avh400  
PROBHD Z108618\_0873 (  
PULPROG zg80  
TD 65536  
SOLVENT CDCl3  
NS 16  
DS 2  
SWH 8012.820 Hz  
FIDRES 0.244532 Hz  
AQ 4.0894465 sec  
RG 44.06  
DW 62.400 usec  
DE 6.50 usec  
TE 300.8 K  
D1 1.00000000 sec  
TD0 1  
SFO1 400.1324008 MHz  
NUC1 <sup>1</sup>H  
P1 14.00 usec  
PLW1 14.36999988 W

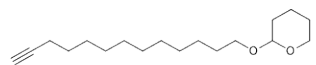

F2 - Processing parameters  
SI 32768  
SF 400.1300101 MHz  
WDW EM  
SSB 0  
LB 0.30 Hz  
GB 0  
PC 1.00

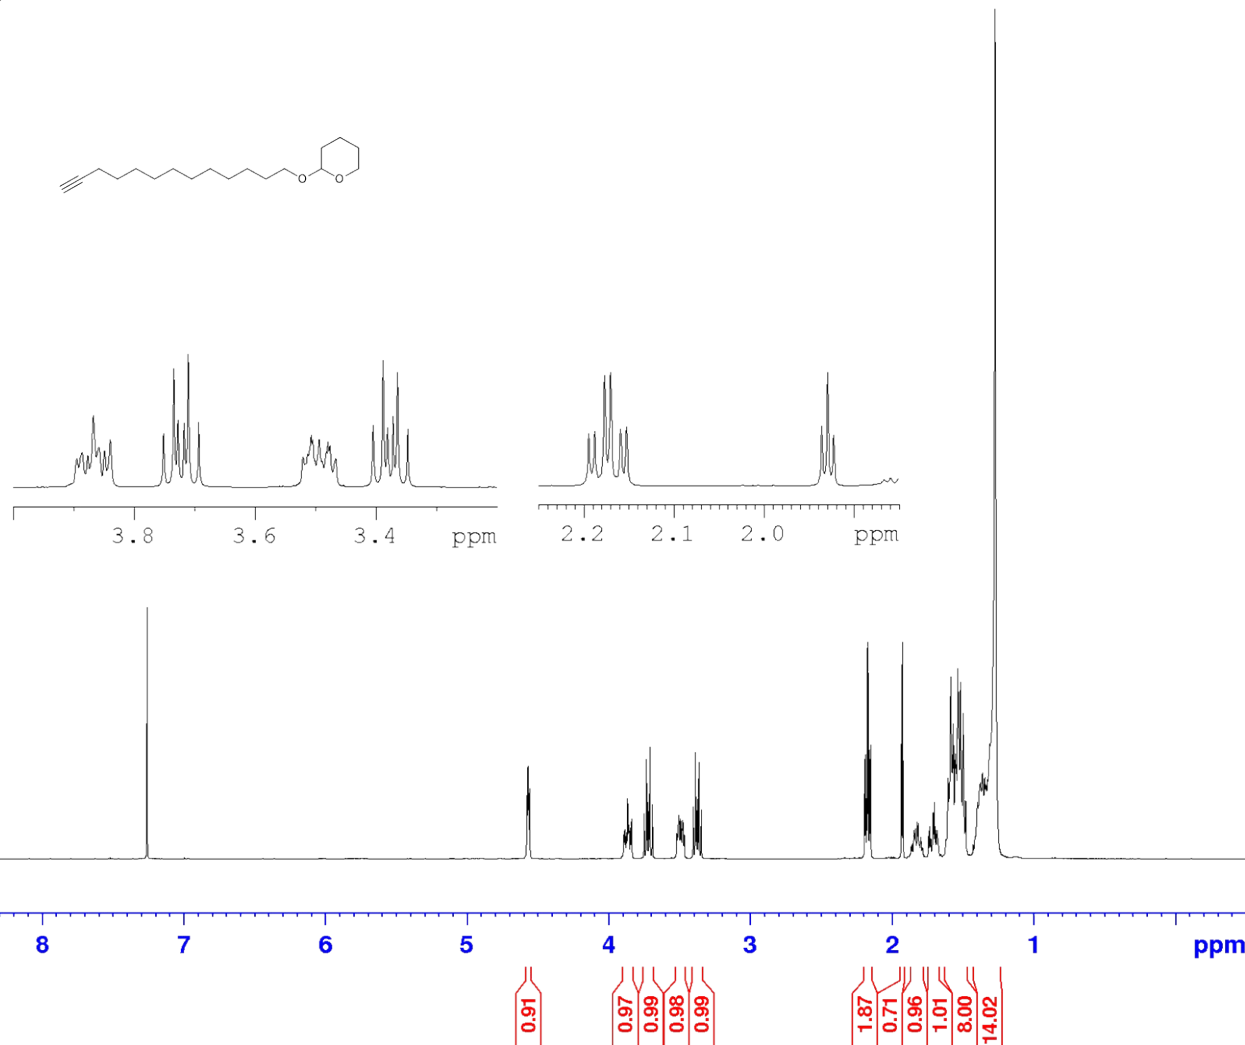

# 13-{{(tetrahydropyran-2'-yl)oxy}}tridecan-1-yne 22 <sup>13</sup>C NMR

Current Data Parameters  
 NAME Aug05-2021-24-08-099 (12-tridecyn-1-ol THP ether)  
 EXPNO 2  
 PROCNO 1

F2 - Acquisition Parameters

Date\_ 20210806  
 Time 1.58 h  
 INSTRUM av9400  
 PROBHD Z108618\_0873 (4  
 PULPROG zgpg30  
 TD 32768  
 SOLVENT CDCl3  
 NS 512  
 DS 4  
 SWH 26041.666 Hz  
 FIDRES 1.589457 Hz  
 AQ 0.6291456 sec  
 RG 197.18  
 DM 19.200 usec  
 DE 6.50 usec  
 TE 303.1 K  
 D1 1.00000000 sec  
 D11 0.03000000 sec  
 TD0 1  
 SFO1 100.6228298 MHz  
 NUC1 13C  
 PO 3.33 usec  
 P1 10.00 usec  
 PLM1 47.86100000 W  
 SFO2 400.1316005 MHz  
 NUC2 1H  
 CTEPRG(2) waltz16  
 ECPD2 90.00 usec  
 PLM2 14.36999989 W  
 PLM12 0.34772000 W  
 PLM13 0.17490000 W

F2 - Processing parameters

SI 32768  
 SF 100.6127533 MHz  
 WDW EM  
 SSB 0  
 LB 1.00 Hz  
 GB 0  
 PC 1.40

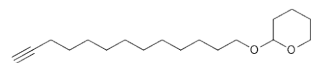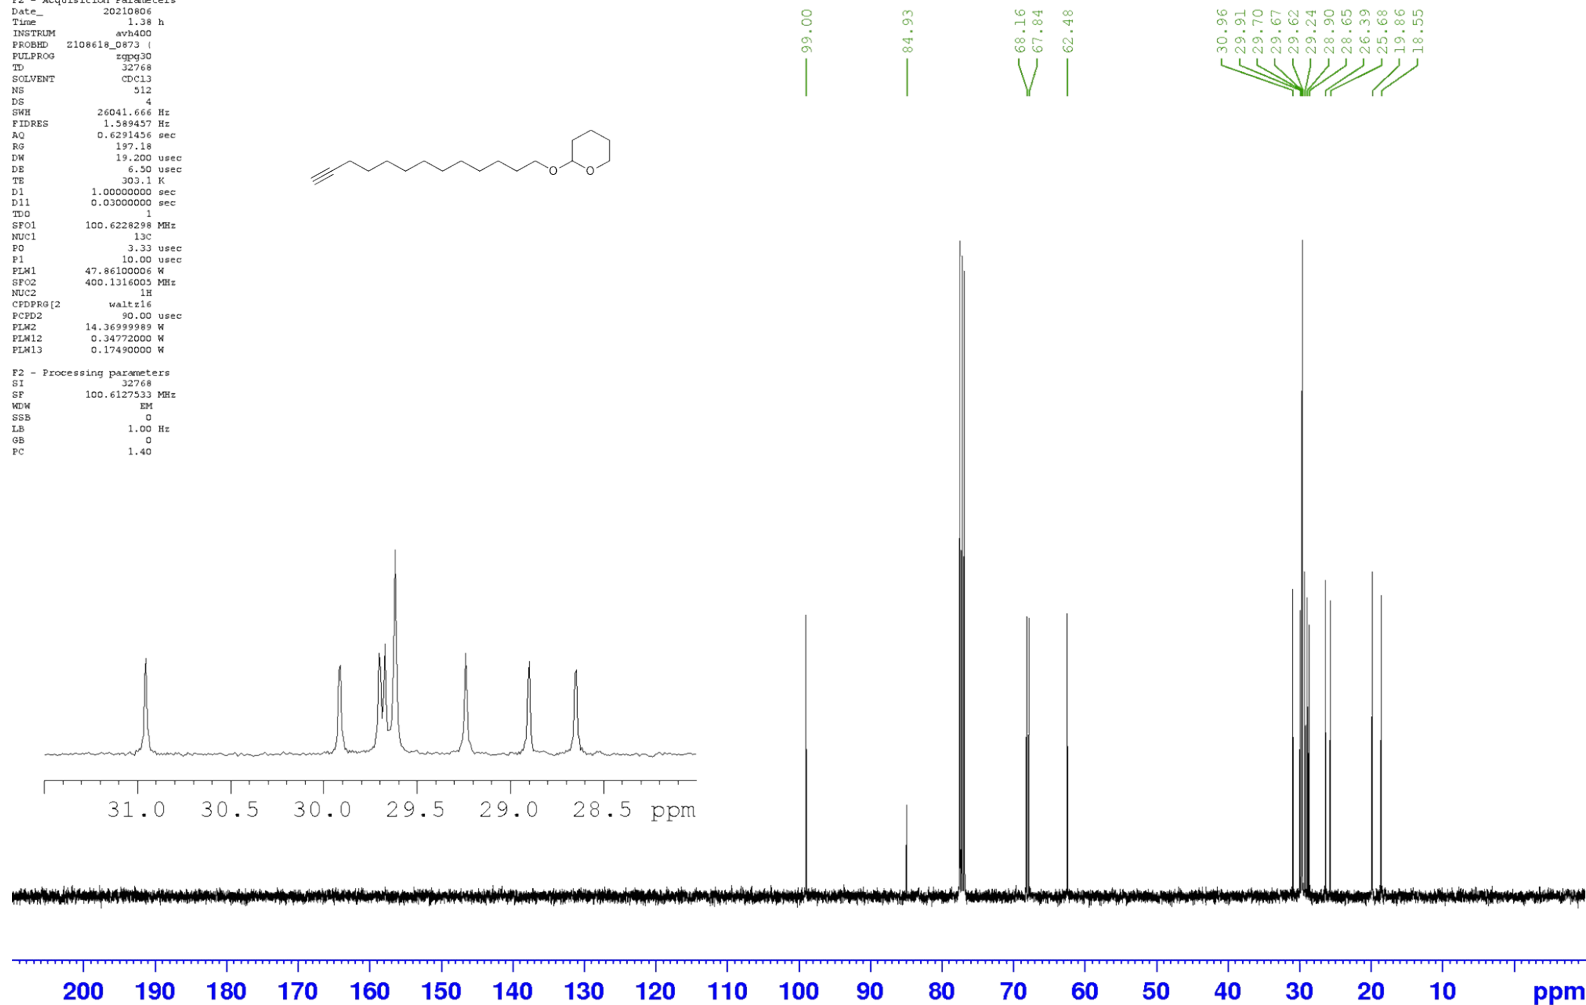

## 13-((tetrahydropyran-2'-yl)oxy)tridecan-1-yne 22 HRMS

Expanded Spectrum RT 0.10, NL 760738, Peak [1], Target Mass 303.2295

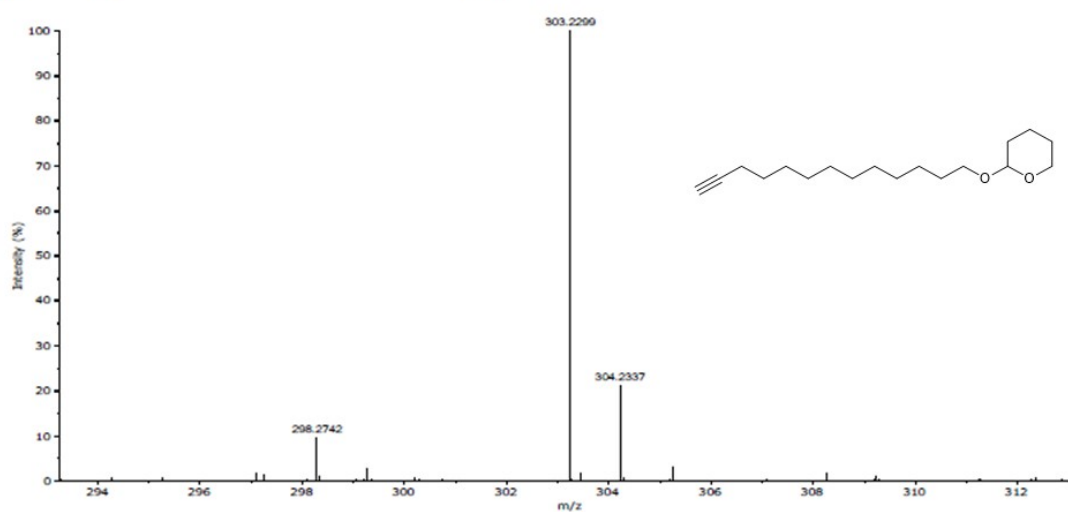

Theoretical Spectrum for C<sub>18</sub>H<sub>32</sub>O<sub>2</sub>Na, Minimum Abundance 0.01%

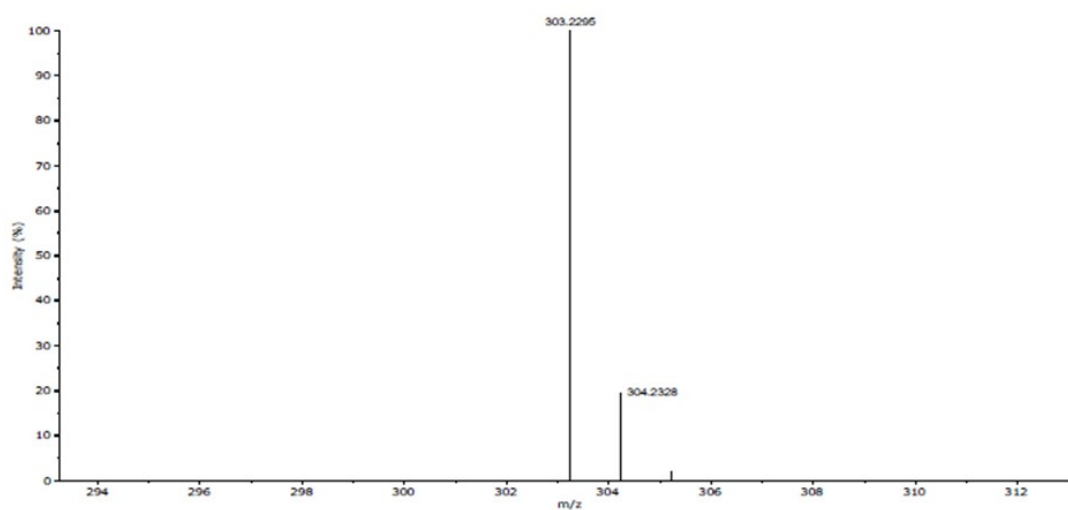

| Measured Mass | Calculated Mass | Error (mDa) | Error (ppm) | Formula [M+Na] <sup>+</sup>                       | Response |
|---------------|-----------------|-------------|-------------|---------------------------------------------------|----------|
| 303.2299      | 303.2295        | 0.44        | 1.47        | C <sub>18</sub> H <sub>32</sub> O <sub>2</sub> Na | 314088   |

# ethyl 4-oxohexadec-15-ynoate <sup>1</sup>H NMR

Current Data Parameters  
NAME gb636740309  
EXPNO 1  
PROCNO 1

F2 - Acquisition Parameters  
Date 20210906  
Time 4.44 h  
INSTRUM Avance  
PROBHD Z159656\_0020 (Z159656)  
PULPROG zg30  
TD 65536  
SOLVENT CDCl3  
NS 16  
DS 2  
SWH 11904.762 Hz  
FIDRES 0.363304 Hz  
AQ 2.7525120 sec  
RG 73.1775  
DW 42.000 usec  
DE 22.00 usec  
TE 298.0 K  
D1 1.0000000 sec  
TDO 1  
SFO1 600.4230021 MHz  
NUC1 1H  
P0 4.00 usec  
P1 12.00 usec  
PLW1 13.51200008 W

F2 - Processing parameters  
SI 65536  
SF 600.4200138 MHz  
WDW EM  
SSB 0  
LB 0.30 Hz  
GB 0  
PC 1.00

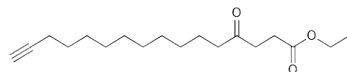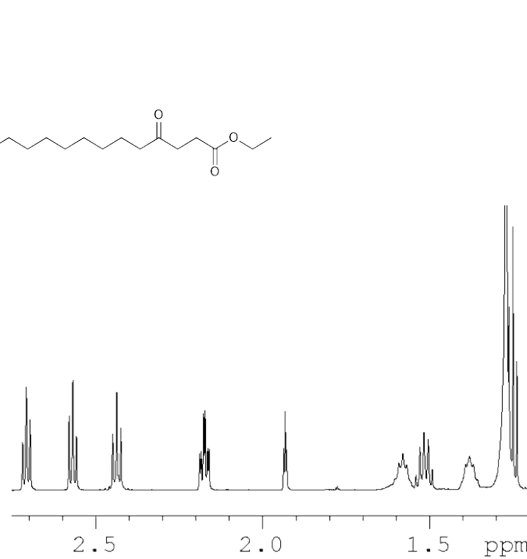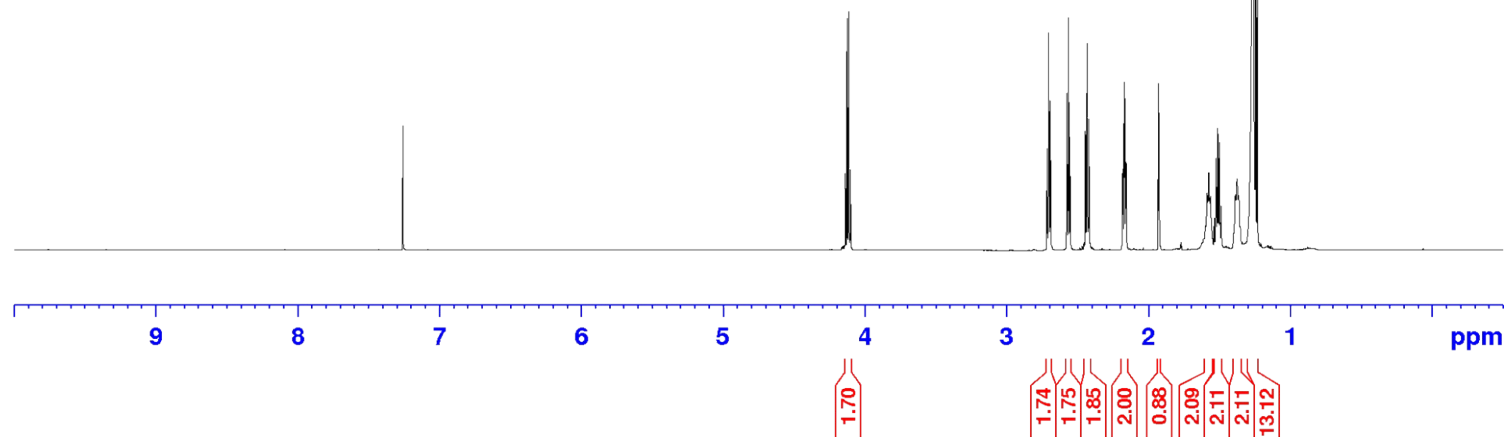

ethyl 4-oxohexadec-15-ynoate 25 <sup>13</sup>C NMR

```

Current Data Parameters
NAME      g0636740309
EXENO     5
PROCNO    1
F2 - Acquisition Parameters
Date_     20210906
Time      5.31 h
INSTRUM   Avance
PROBHD    Z159656_0020 (
PULPROG   zgpg30
TD        65536
SOLVENT   CDCl3
NS         512
DS         4
SWH        35714.285 Hz
FIDRES     1.089913 Hz
AQ         0.9175040 sec
RG         101
DM         14.000 usec
DE         18.00 usec
TE         298.0 K
D1         2.0000000 sec
D11        0.03000000 sec
TDO        1
SFO1       150.9908267 MHz
NUC1       13C
PC         3.33 usec
P1         10.00 usec
PLM1       41.91400146 W
SFO2       600.4224017 MHz
NUC2       1H
CPDPRG2   waltz16
PCPD2      80.00 usec
PLM2       13.51200008 W
PLM12      0.30124050 W
PLM13      0.15098180 W
F2 - Processing parameters
SI         65536
SF         150.9757082 MHz
WDW        EM
SSB        0
LB         1.00 Hz
GB         0
PC         1.40
    
```

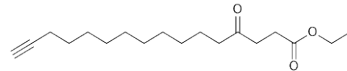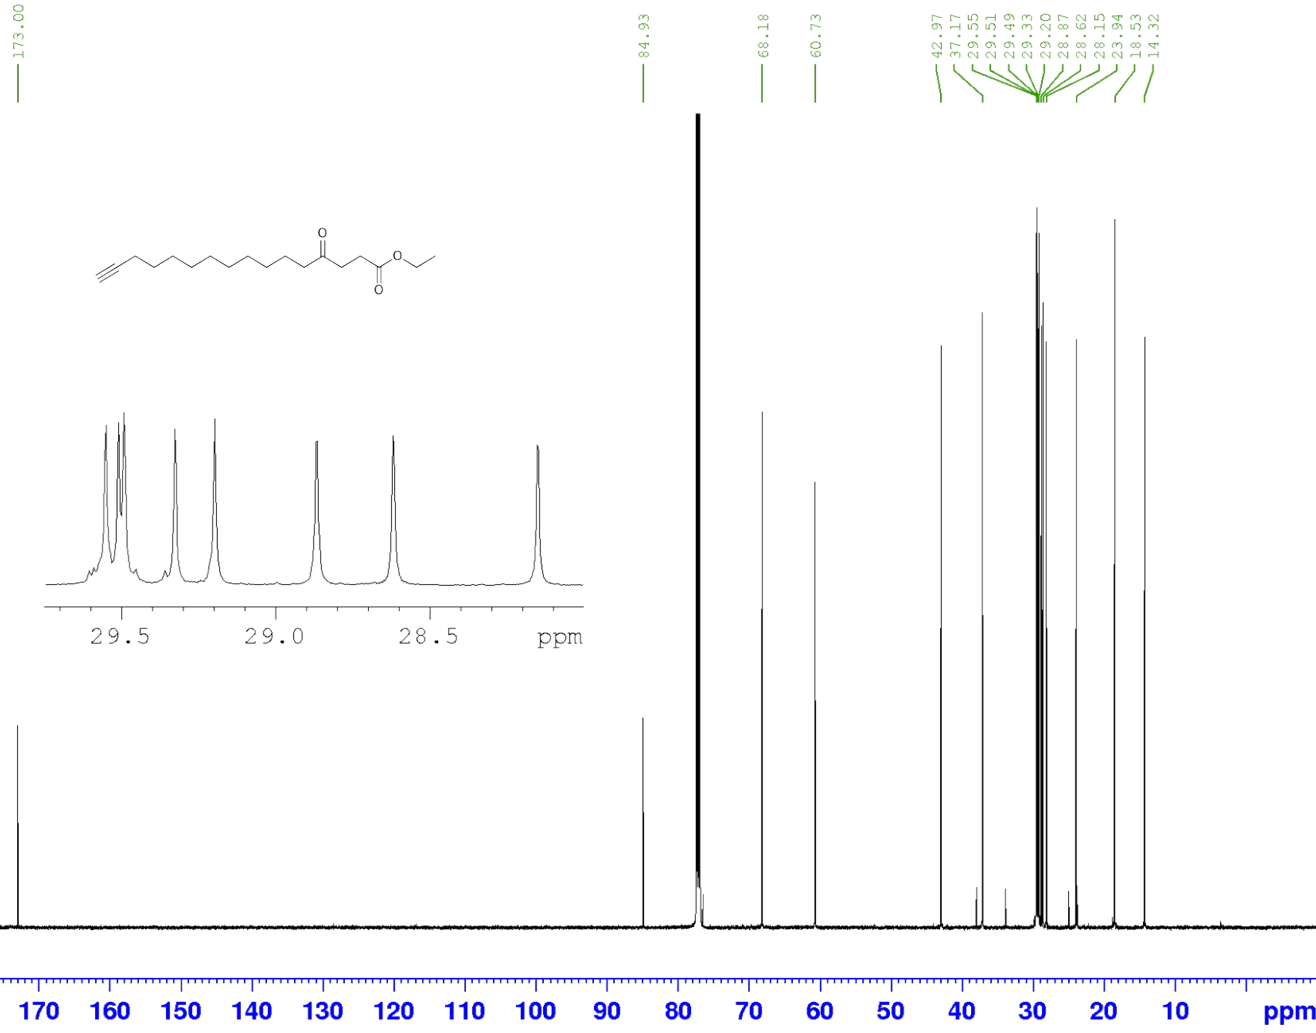

ethyl 4-oxohexadec-15-ynoate 25 HMRS

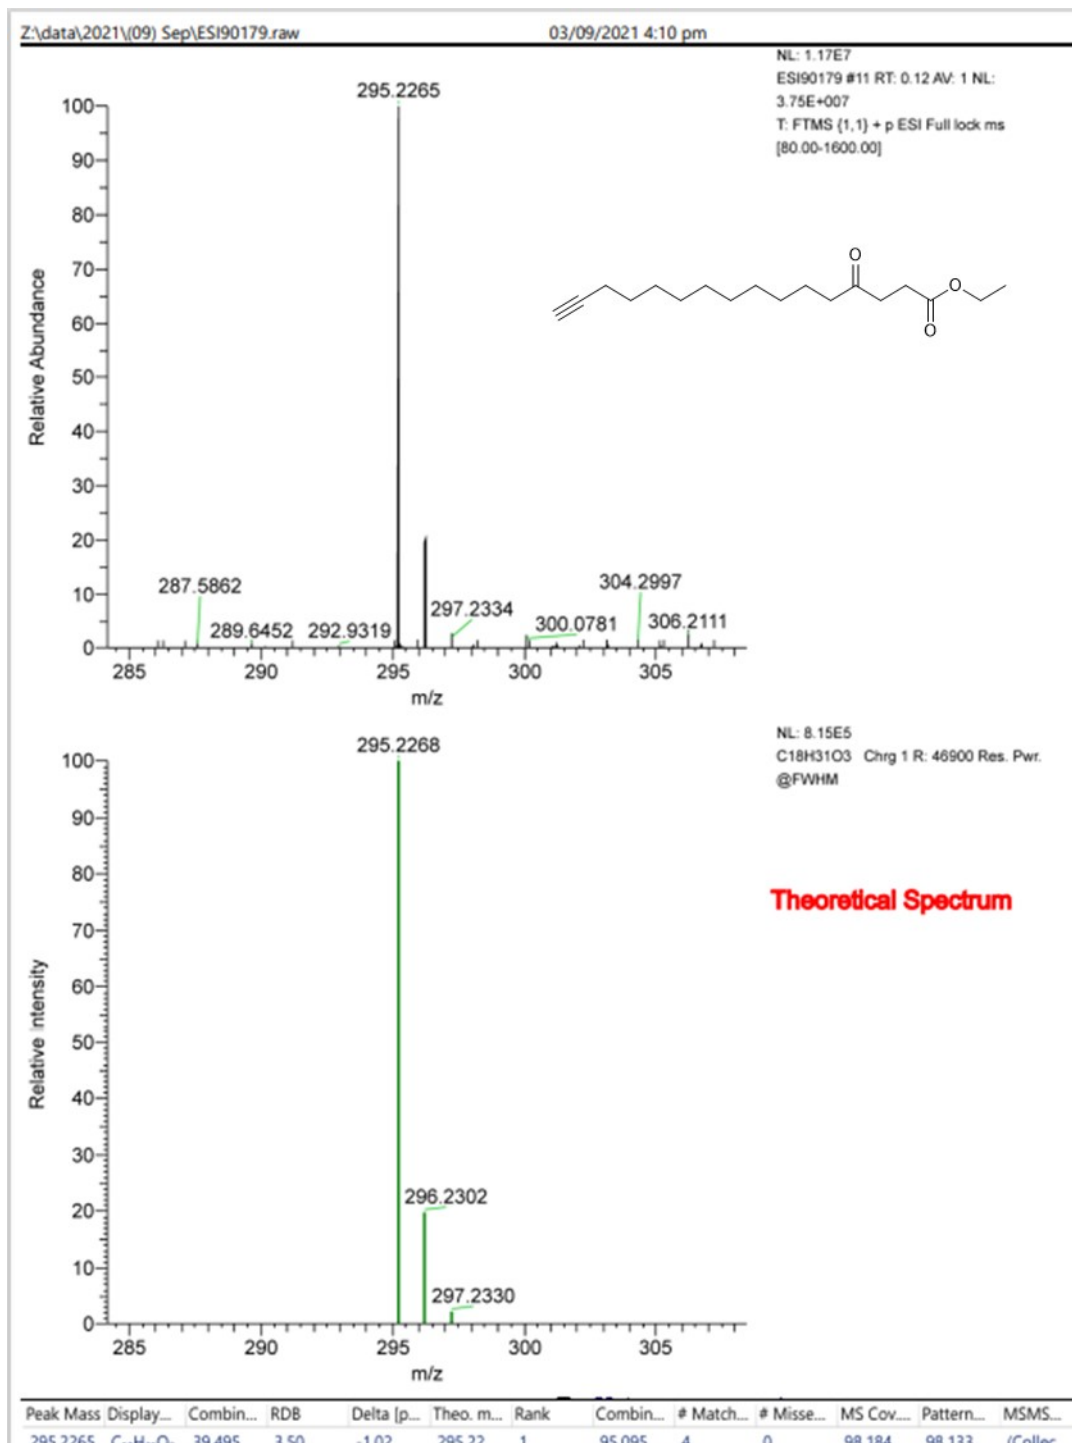

# 4-oxohexadec-15-ynoic acid 26 <sup>1</sup>H NMR

Current Data Parameters  
NAME gb636950609  
EXPNO 1  
PROCNO 1

F2 - Acquisition Parameters  
Date 20210907  
Time 5.20 h  
INSTRUM Avance  
PROBHD Z159656\_0020 (Z159656)  
PULPROG zg30  
TD 65536  
SOLVENT CDCl3  
NS 16  
DS 2  
SWH 11904.762 Hz  
FIDRES 0.363304 Hz  
AQ 2.7525120 sec  
RG 77.4444  
DW 42.000 usec  
DE 22.00 usec  
TE 298.0 K  
D1 1.0000000 sec  
TDO 1  
SFO1 600.4230021 MHz  
NUC1 1H  
P0 4.00 usec  
P1 12.00 usec  
PLW1 13.51200008 W

F2 - Processing parameters  
SI 65536  
SF 600.4200145 MHz  
WDW EM  
SSB 0  
LB 0.30 Hz  
GB 0  
PC 1.00

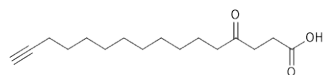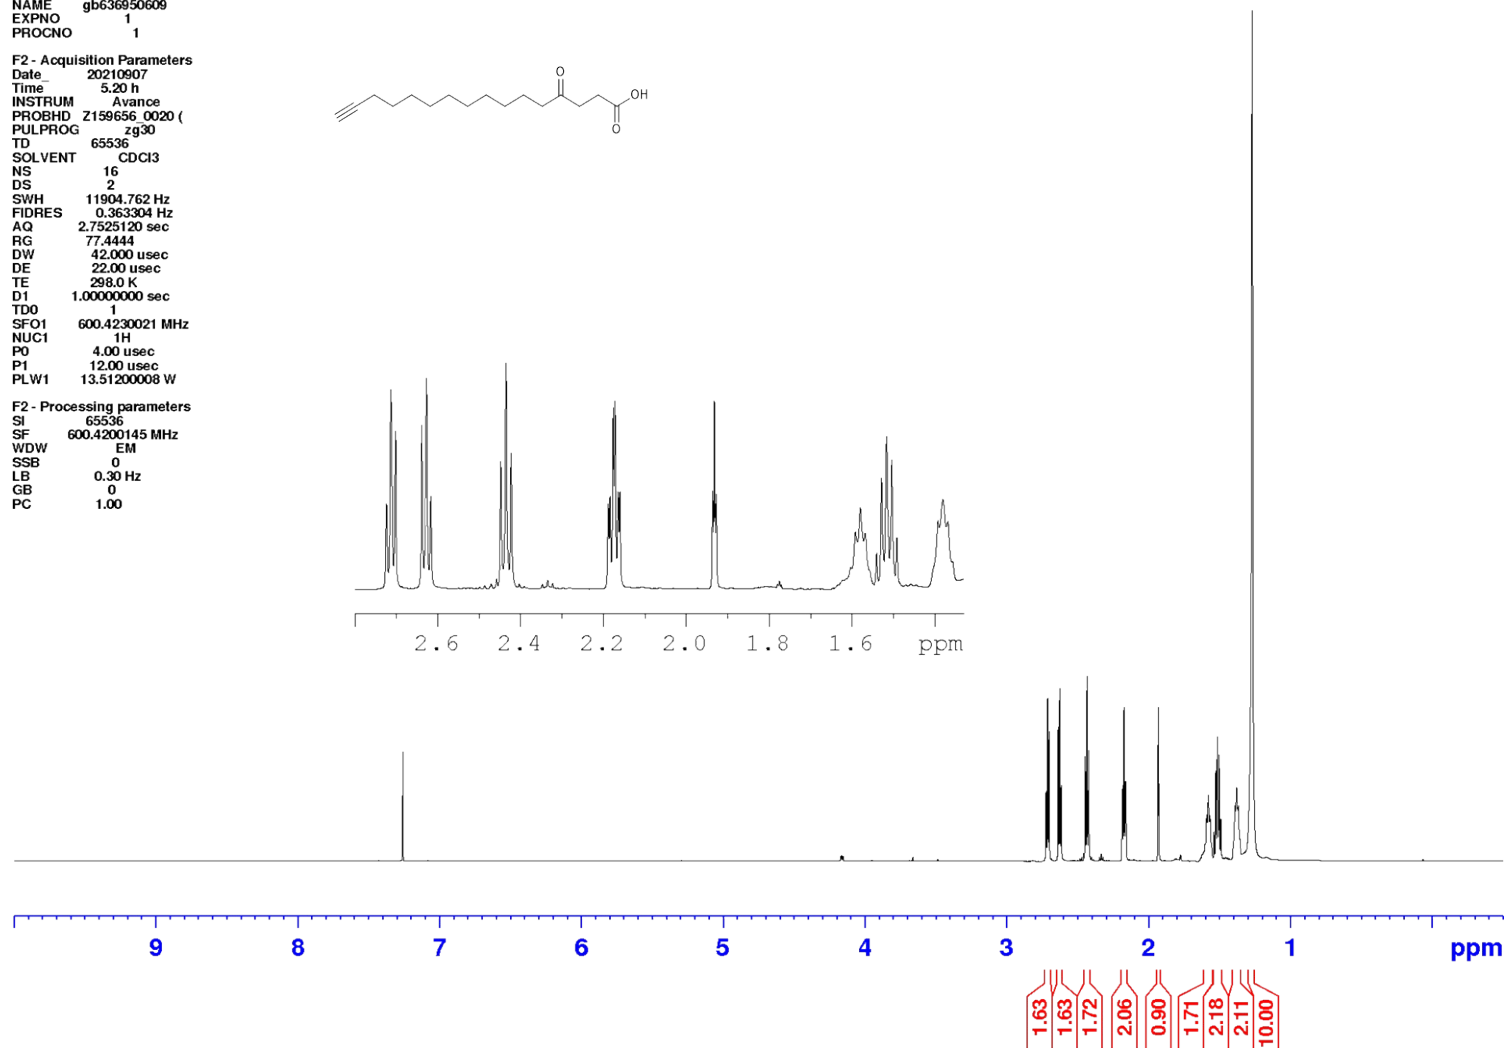

### 4-oxohexadec-15-ynoic acid 26 <sup>13</sup>C NMR

```

Current Data Parameters
NAME      qb63695009
EXENO     5
PROCNO    1

F2 - Acquisition Parameters
Date_     20210907
Time      6.28 h
INSTRUM   Avance
PROBHD    Z159656_0020 (
PULPROG   zgpg30
TD        65536
SOLVENT   CDCl3
NS         512
DS         4
SWH       35714.285 Hz
FIDRES    1.089913 Hz
AQ         0.9175040 sec
RG         101
DM         14.000 usec
DE         18.000 usec
TE         298.0 K
D1         2.00000000 sec
D11        0.03000000 sec
TDO        1
SFO1      150.9908267 MHz
NUC1       13C
PC         3.33 usec
P1         10.00 usec
PLM1      41.91400146 W
SFO2      600.4224017 MHz
NUC2       1H
CPDPRG2   waltz16
PCPD2     80.00 usec
PLM2      13.51200008 W
PLM12     0.30124050 W
PLM13     0.15098180 W

F2 - Processing parameters
SI         65536
SF         150.9757062 MHz
WDW        EM
SSB        0
LB         1.00 Hz
GB         0
PC         1.40
    
```

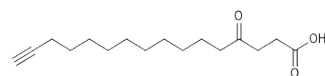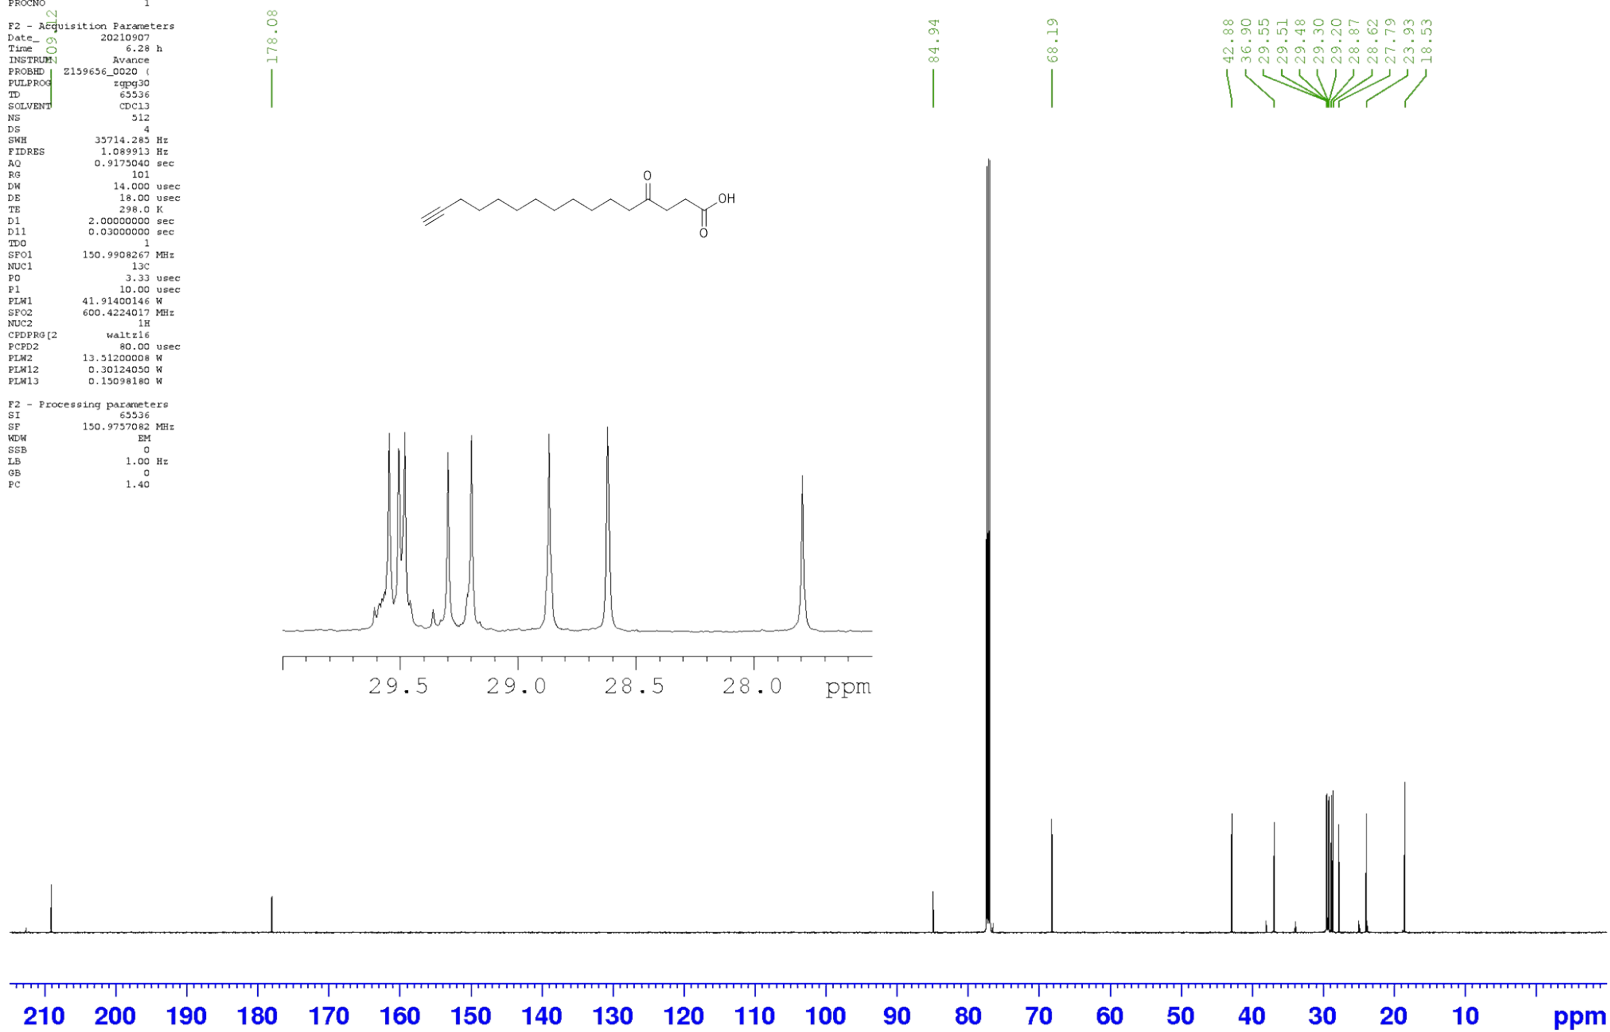

### 4-oxohexadec-15-ynoic acid 26 HRMS

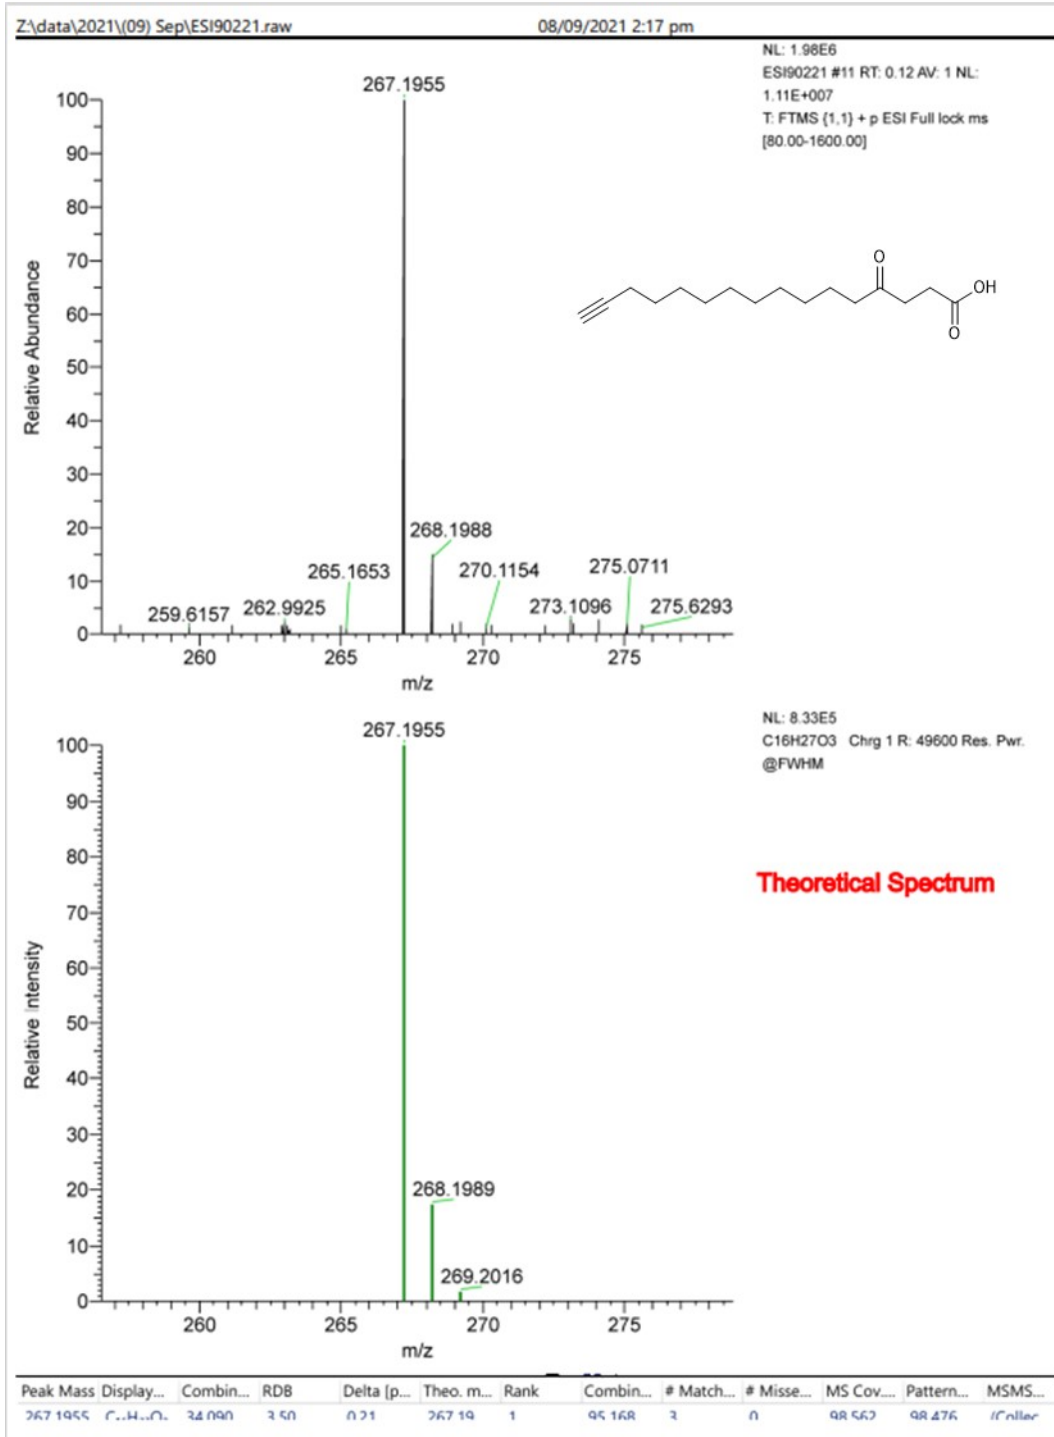

### 3-[3-(dodec-11-yn-1-yl)diazirin-3-yl]propanoic acid 27 <sup>1</sup>H NMR

Current Data Parameters  
NAME gb664210305 (C16 Diaz Acid)  
EXPNO 1  
PROCNO 1

F2 - Acquisition Parameters  
Date\_ 20220504  
Time 1.15 h  
INSTRUM Avance  
PROBHD Z159656\_0020 (  
PULPROG zg30  
TD 65536  
SOLVENT CDCl3  
NS 16  
DS 2  
SWH 11904.762 Hz  
FIDRES 0.363304 Hz  
AQ 2.7525120 sec  
RG 75.0793  
DW 42.000 usec  
DE 22.00 usec  
TE 298.0 K  
D1 1.0000000 sec  
TD0 1  
SFO1 600.4230021 MHz  
NUC1 1H  
P0 4.00 usec  
P1 12.00 usec  
PLW1 13.51200008 W

F2 - Processing parameters  
SI 65536  
SF 600.4200145 MHz  
WDW EM  
SSB 0  
LB 0.30 Hz  
GB 0  
PC 1.00

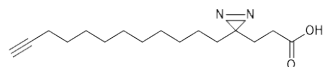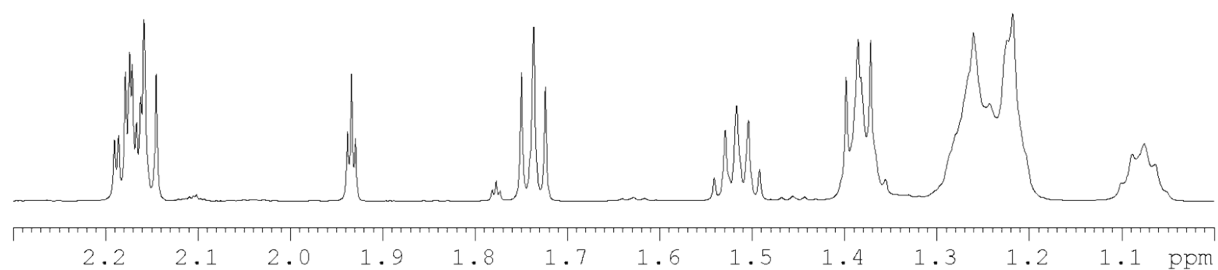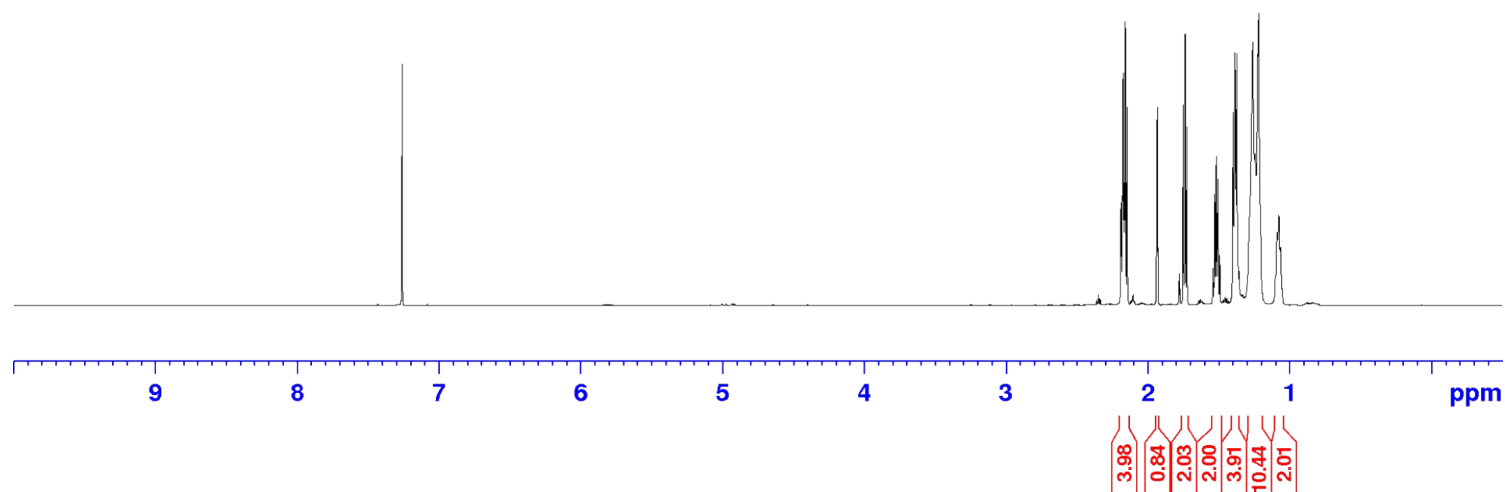

### 3-[3-(dodec-11-yn-1-yl)diazirin-3-yl]propanoic acid 27 <sup>13</sup>C NMR

Current Data Parameters  
 NAME gp664210305 (C16 Diaz Acid)  
 EXPNO 3  
 PROCNO 1

F2 - Acquisition Parameters  
 Date\_ 20220504  
 Time 2.24 h  
 INSTRUM Avance  
 PFGPBD 2159456\_0020 (1  
 PULPROG zgpg30  
 TD 65536  
 SOLVENT cdc13  
 NS 512  
 DS 4  
 SWH 35714.285 Hz  
 FIDRES 1.089913 Hz  
 AQ 0.9175040 sec  
 RG 101  
 DW 14.000 usec  
 DE 18.00 usec  
 TE 298.0 K  
 D1 2.00000000 sec  
 D11 0.03000000 sec  
 TD0 1  
 SFO1 150.9923364 MHz  
 NUC1 13C  
 FO 3.33 usec  
 F1 10.00 usec  
 FLM1 41.91400146 W  
 SFO2 600.4224017 MHz  
 NUC2 1H  
 CPDPRG2 waltz16  
 PCPD2 80.00 usec  
 FLM2 13.51200008 W  
 FLM12 0.30124030 W  
 FLM13 0.15098180 W

F2 - Processing parameters  
 SI 65536  
 SF 150.9923364 MHz  
 WDM EM  
 SSB 0  
 LB 1.00 Hz  
 GB 0  
 PC 1.40

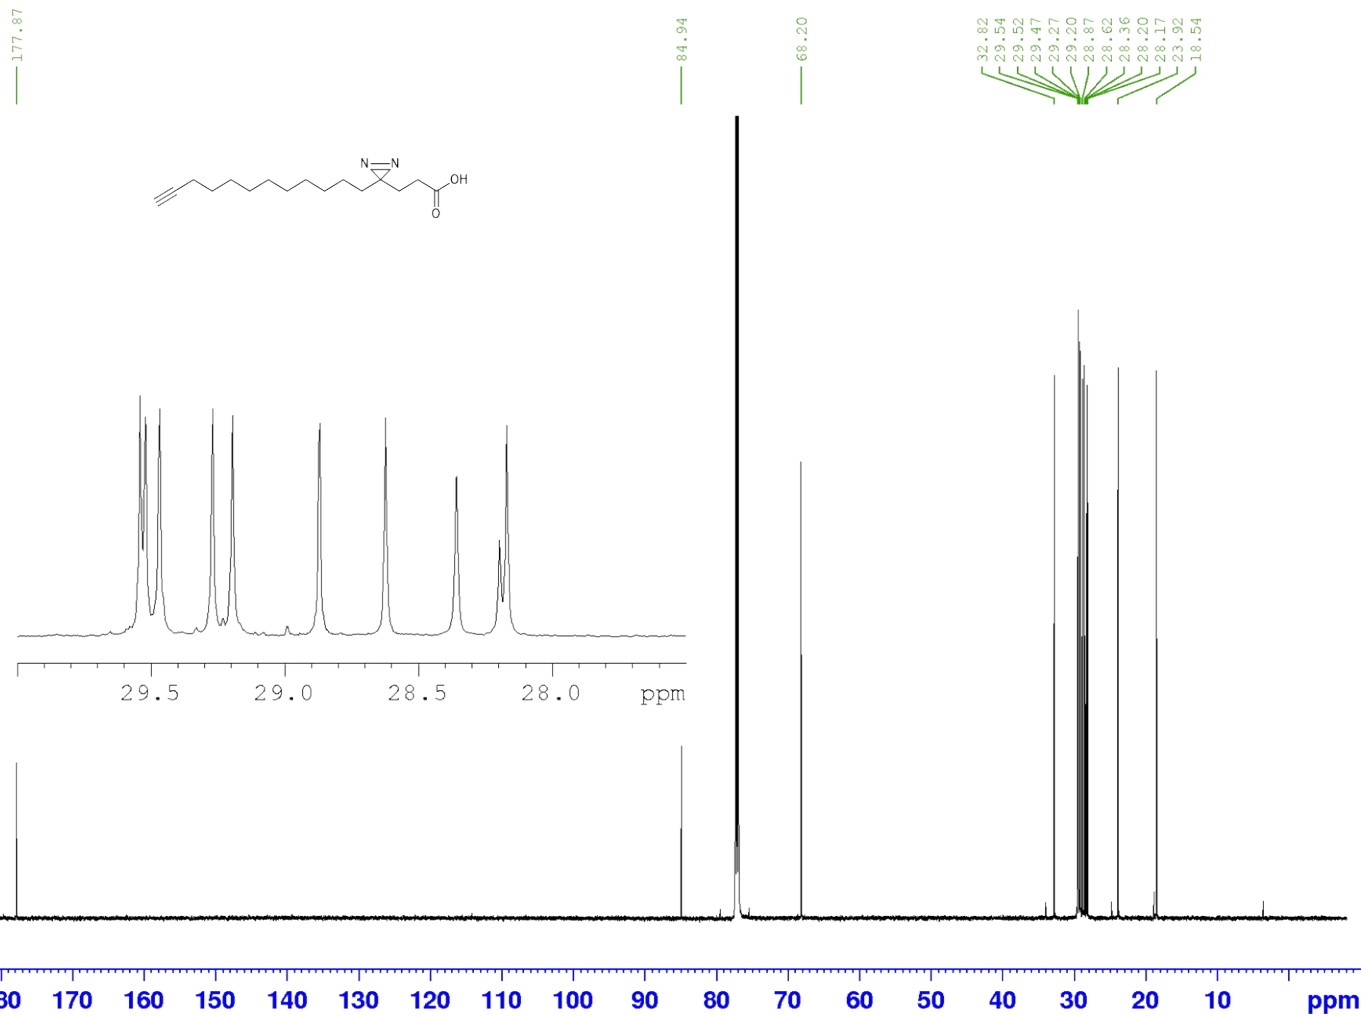

### 3-[3-(dodec-11-yn-1-yl)diazirin-3-yl]propanoic acid 27 HRMS

\\mass-exact\Xcalibur\data\2021\09 Sep\ESI90492.raw 29/09/2021 10:53 am

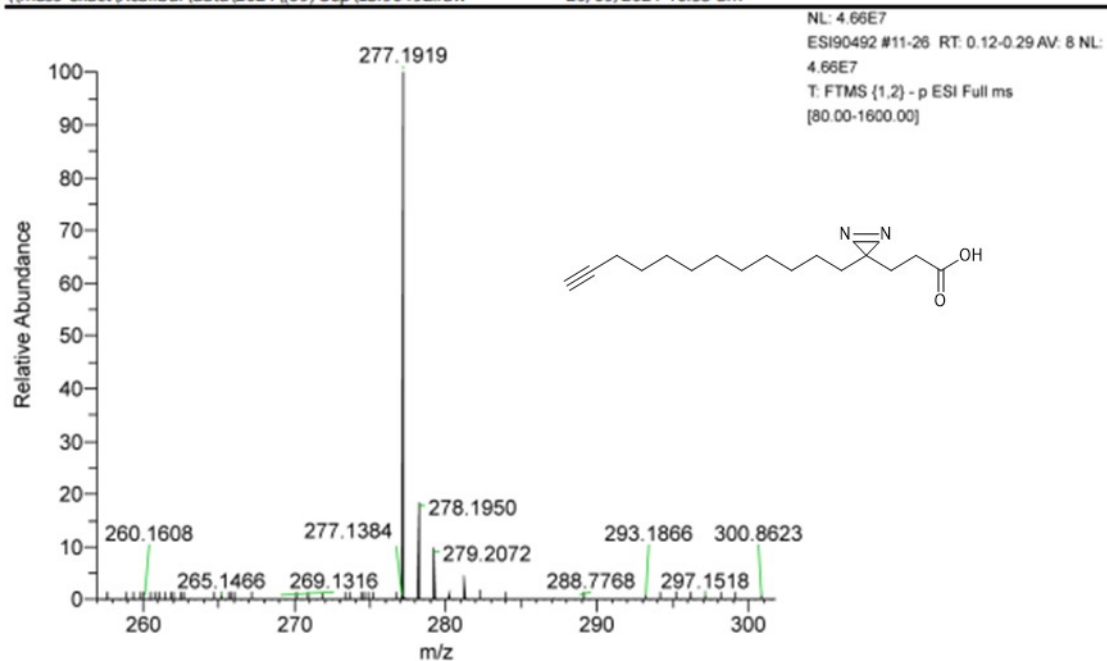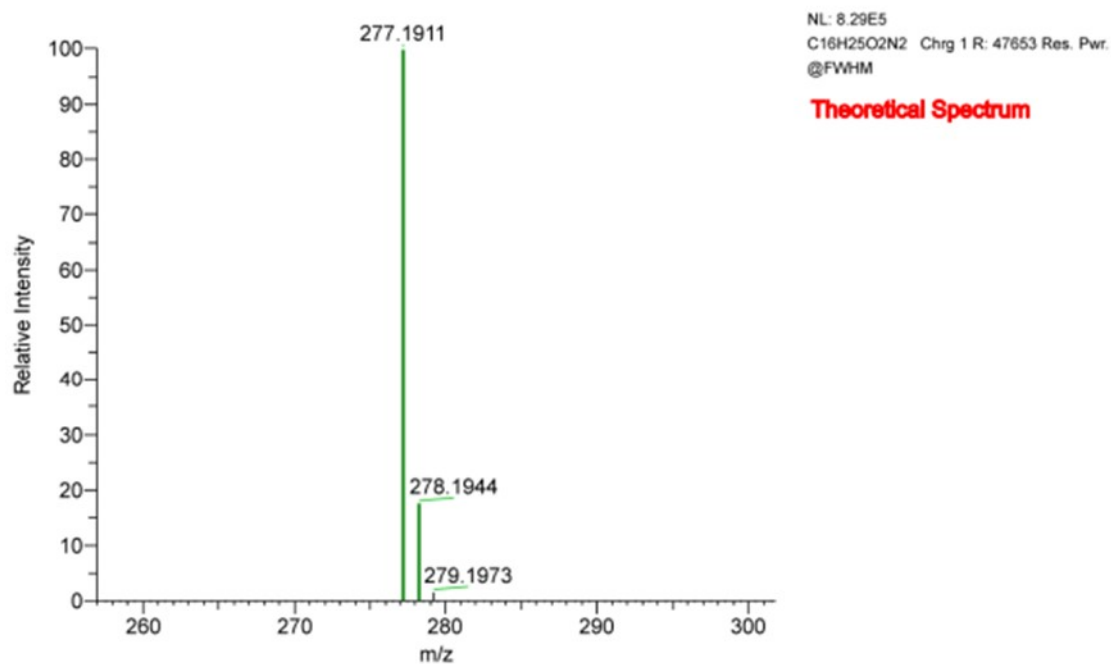

| Peak Mass Display... | Delta [p...                         | Combin... | RDB       | Theo. m... | Rank      | Combin... | # Match... | # Misse... | MS Cov... | Pattern... | MSMS...   |            |
|----------------------|-------------------------------------|-----------|-----------|------------|-----------|-----------|------------|------------|-----------|------------|-----------|------------|
| 277.1919             | C <sub>16</sub> H <sub>25</sub> ... | 2.90      | 23.059... | 5.50       | 277.19... | 1         | 84.796...  | 4          | 0         | 88.226...  | 98.455... | (Collec... |

**(+)-(R)-2-((3-(3-(dodec-11-yn-1-yl)-3H-diazirin-3-yl)propanoyl)oxy)-3-((triethylsilyl)oxy)propyl palmitate 31 <sup>1</sup>H NMR**

Current Data Parameters  
 NAME gb64510405 (C16, C16 Diaz-OTES)  
 EXPNO 1  
 PROCNO 1

F2 - Acquisition Parameters  
 Date\_ 20220505  
 Time 1.04 h  
 INSTRUM Avance  
 PROBHD Z159656\_0020 (zg30)  
 PULPROG zg30  
 TD 65536  
 SOLVENT CDCl3  
 NS 16  
 DS 2  
 SWH 11904.762 Hz  
 FIDRES 0.363304 Hz  
 AQ 2.7525120 sec  
 RG 70.8784  
 DW 42.000 usec  
 DE 22.00 usec  
 TE 298.0 K  
 D1 1.0000000 sec  
 TDO 1  
 SFO1 600.4230021 MHz  
 NUC1 1H  
 RO 4.00 usec  
 P1 12.00 usec  
 PLW1 13.51200008 W

F2 - Processing parameters  
 SI 65536  
 SF 600.4200144 MHz  
 WDW EM  
 SSB 0  
 LB 0.30 Hz  
 GB 0  
 PC 1.00

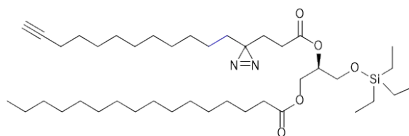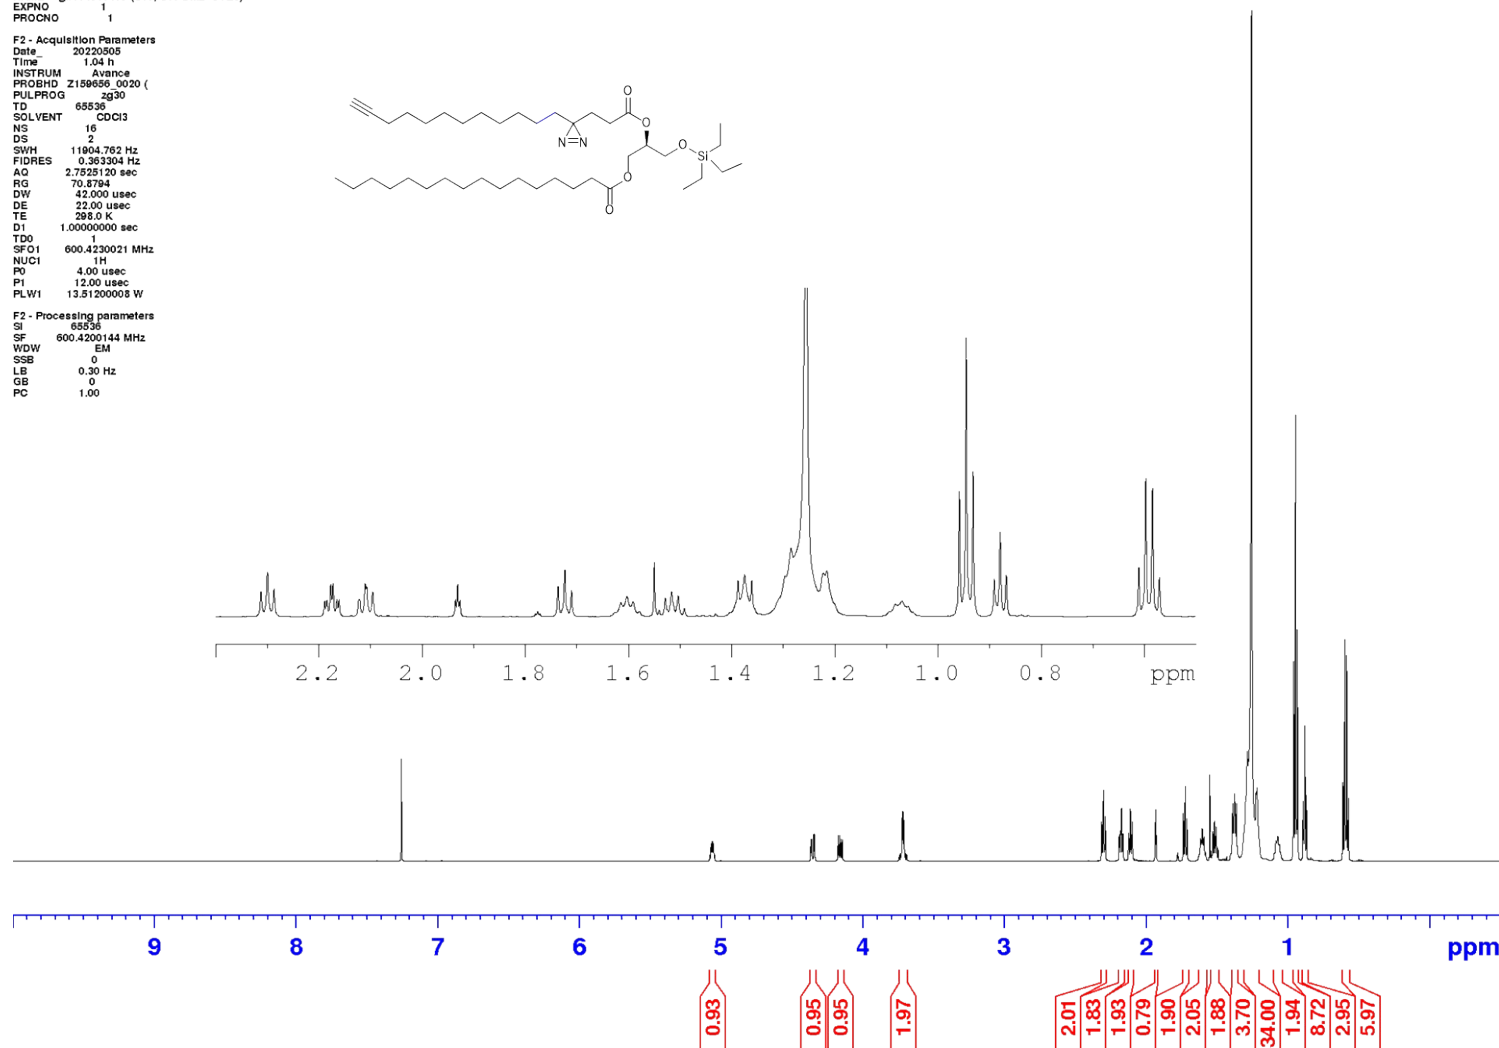

**(+)-(R)-2-((3-(3-(dodec-11-yn-1-yl)-3H-diazirin-3-yl)propanoyl)oxy)-3-((triethylsilyl)oxy)propyl palmitate 31 <sup>13</sup>C NMR**

Current Data Parameters  
 NAME gb664510405 (C16, C16 Diaz -OTES)  
 EXPNO 5  
 PROCNO 1

F2 - Acquisition Parameters  
 Date\_ 20220505  
 Time 2.38 h  
 INSTRUM Avance  
 PROBHD Z199656\_0020 (1  
 PULPROG zgpg30  
 TD 65536  
 SOLVENT CDCl3  
 NS 1024  
 DS 4  
 SWH 35714.283 Hz  
 FIDRES 1.089913 Hz  
 AQ 0.9175040 sec  
 RG 101  
 DM 14.000 usec  
 DE 18.00 usec  
 TE 298.0 K  
 D1 2.0000000 sec  
 D11 0.0300000 sec  
 TD0 1  
 SFO1 150.9923364 MHz  
 NUC1 13C  
 PO 3.33 usec  
 P1 10.00 usec  
 PLM1 41.91400146 M  
 SFO2 600.4224017 MHz  
 NUC2 1H  
 CPDPRG2 waltz16  
 PCPD2 80.00 usec  
 PLM2 13.51200008 M  
 PLM12 0.30124000 M  
 PLM13 0.15098180 M

F2 - Processing parameters  
 SI 65536  
 SF 150.9757073 MHz  
 WDW EM  
 SSB 0  
 LB 1.00 Hz  
 GB 0  
 PC 1.40

173.62  
171.79

84.91

72.43

68.19

62.42

61.23

34.29

32.85

32.08

29.85

29.81

29.79

29.64

29.56

29.56

29.51

29.45

29.32

29.29

29.21

28.88

28.79

28.63

28.40

28.25

25.06

23.95

22.84

18.54

14.26

6.79

4.44

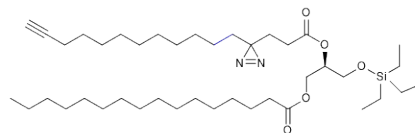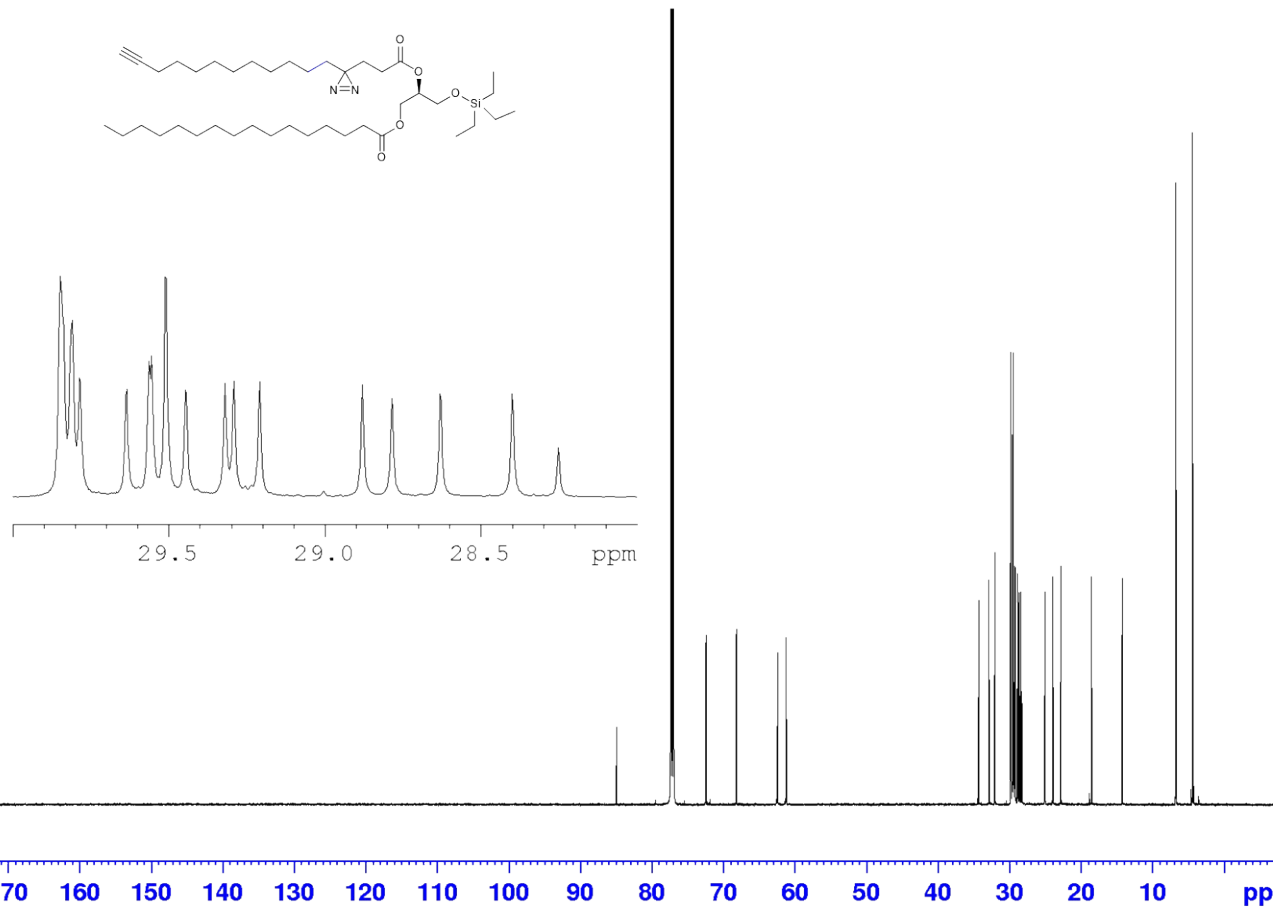

**(+)-(R)-2-((3-(3-(dodec-11-yn-1-yl)-3H-diazirin-3-yl)propanoyl)oxy)-3-((triethylsilyl)oxy)propyl palmitate 31 HRMS**

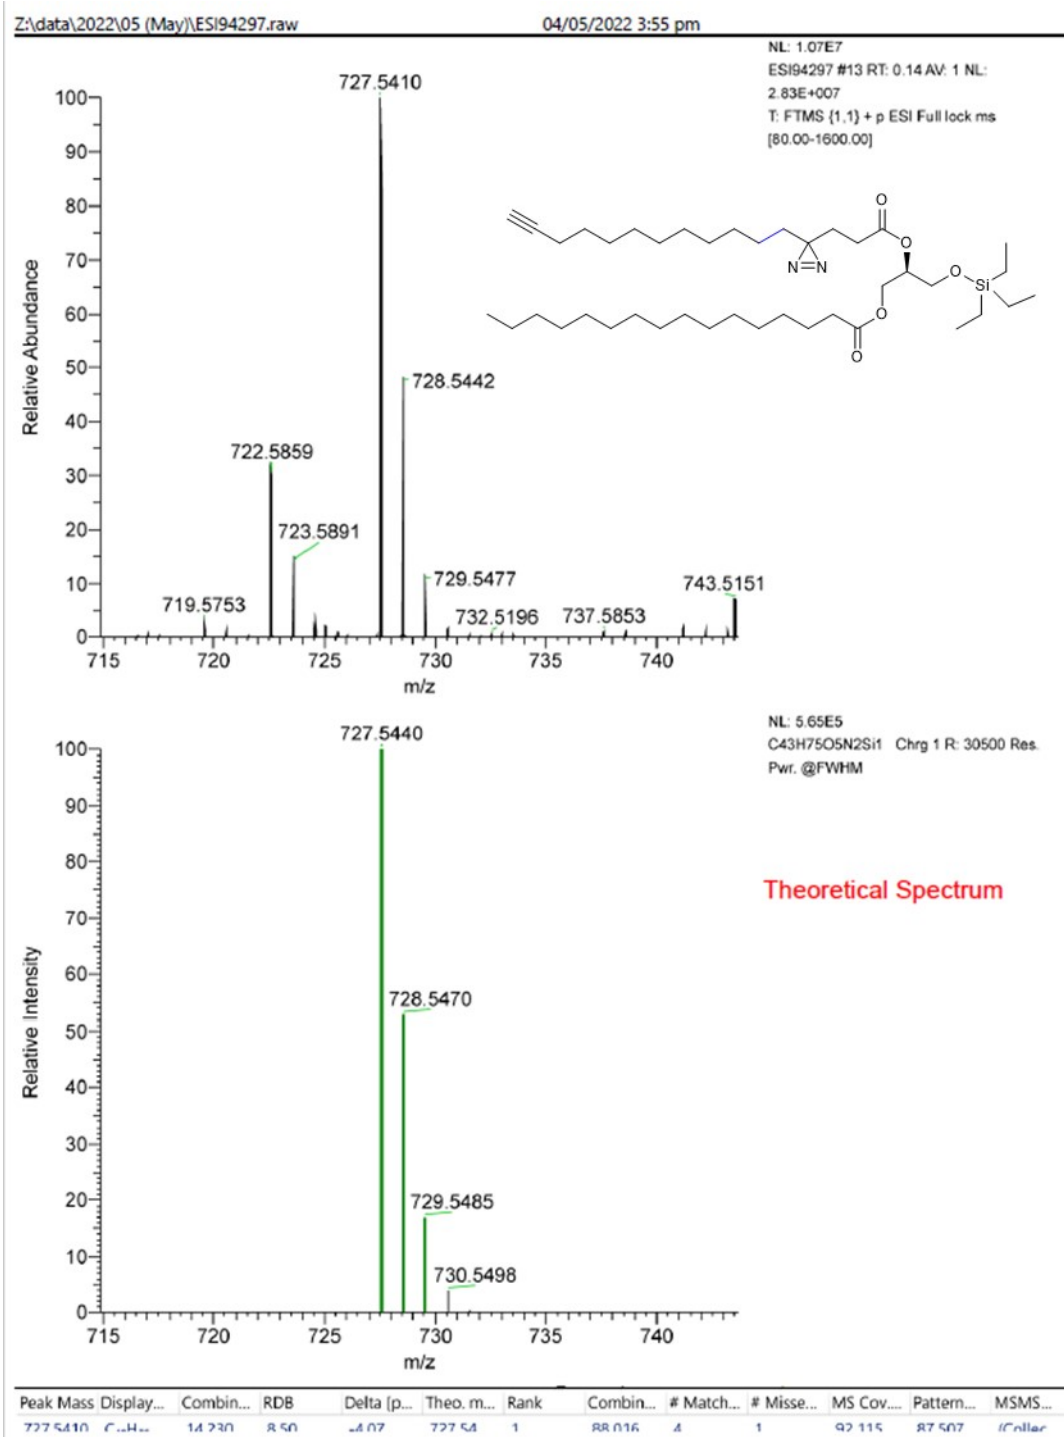

(S)-2-((3-(3-(dodec-11-yn-1-yl)-3H-diazirin-3-yl)propanoyl)oxy)-3-hydroxypropyl palmitate 32 <sup>1</sup>H NMR

Current Data Parameters  
NAME gb66641005 (C16, C16 Diaz -OH)  
EXPNO 1  
PROCNO 1

F2 - Acquisition Parameters  
Date\_ 20220511  
Time 13.23 h  
INSTRUM Avance  
PROBHD Z199666.0020 (zg30)  
PULPROG zg30  
TD 65536  
SOLVENT CDCl3  
NS 16  
DS 2  
SWH 11904.762 Hz  
FIDRES 0.363304 Hz  
AQ 2.7525120 sec  
RG 74.9728  
DW 42.000 usec  
DE 22.00 usec  
TE 298.0 K  
D1 1.00000000 sec  
TDO 1  
SFO1 600.4230021 MHz  
NUC1 1H  
PO 4.00 usec  
P1 12.00 usec  
PLW1 13.51200008 W

F2 - Processing parameters  
SI 65536  
SF 600.4200139 MHz  
WDW EM  
SSB 0  
LB 0.33 Hz  
GB 0  
PC 1.00

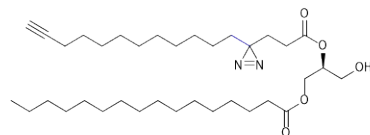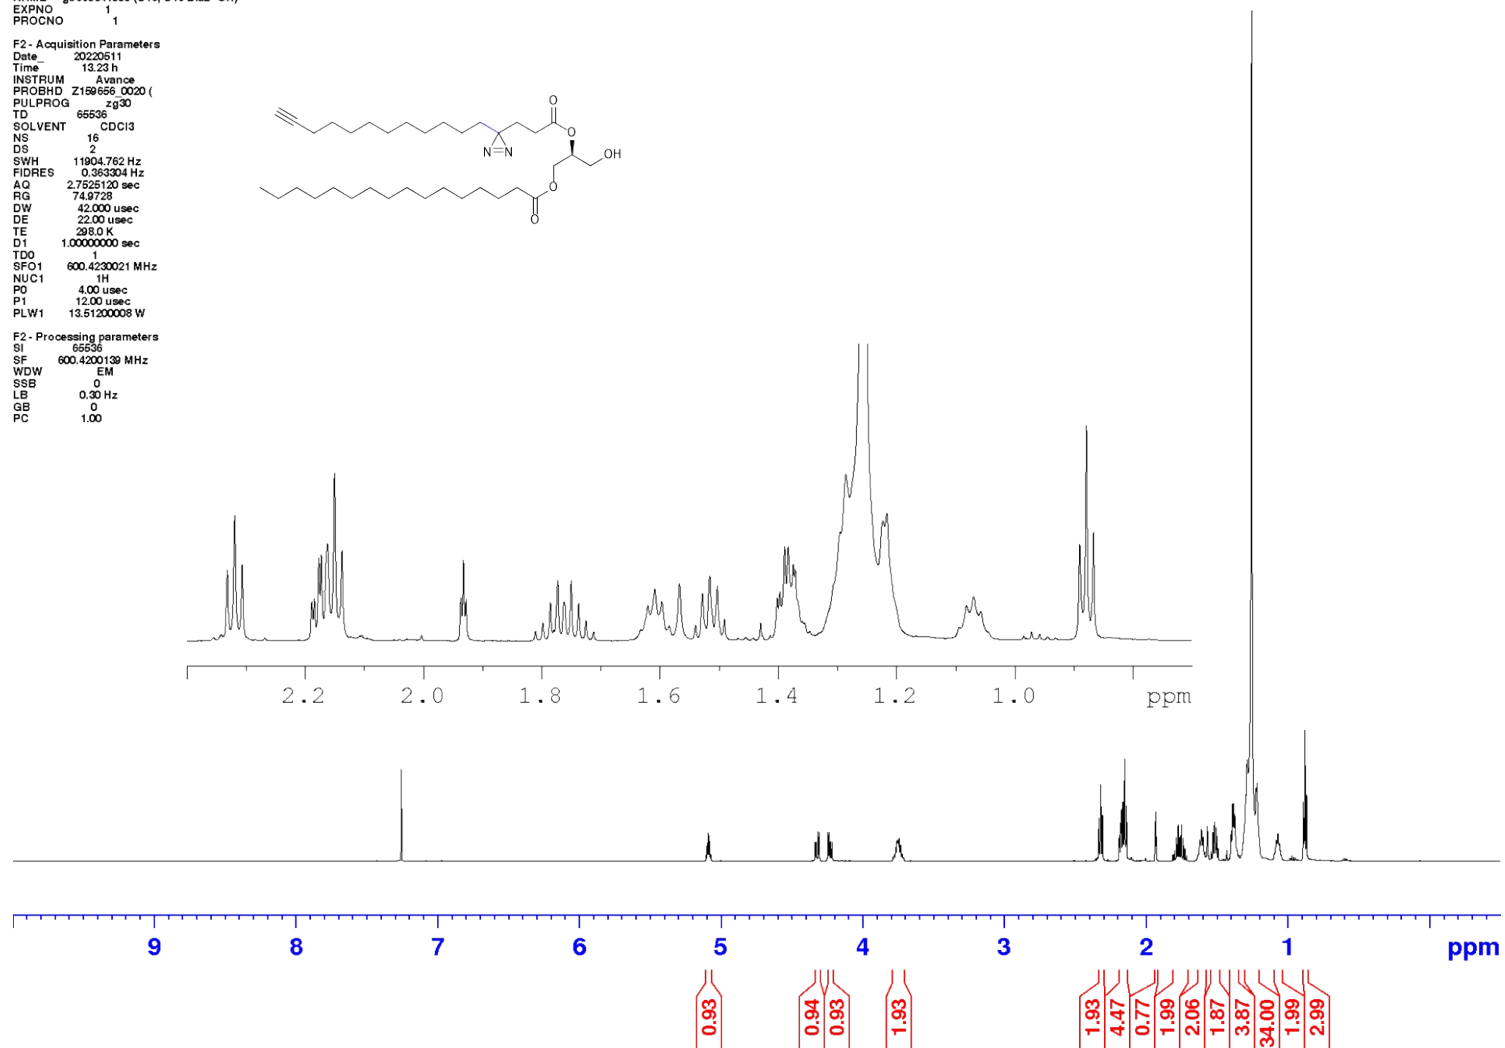

(S)-2-((3-(3-(dodec-11-yn-1-yl)-3H-diazirin-3-yl)propanoyl)oxy)-3-hydroxypropyl palmitate <sup>13</sup>C NMR

Current Data Parameters  
 NAME gb66341005 (C16, C16 Diaz -OH)  
 EXPNO 5  
 PROCNO 1

F2 - Acquisition Parameters  
 Date\_ 20220511  
 Time 14:57 h  
 INSTRUM Avance  
 PROBHD Z199656\_0020 ( rpgq90  
 PULPROG zgpg30  
 TD 65536  
 SOLVENT CDCl3  
 NS 1024  
 DS 4  
 SWH 35714.285 Hz  
 FIDRES 1.089913 Hz  
 AQ 0.9175040 sec  
 RG 101  
 DM 14.000 usec  
 DE 18.00 usec  
 TE 298.0 K  
 D1 2.0000000 sec  
 D11 0.0300000 sec  
 TD0 1  
 SFO1 150.9923364 MHz  
 NUC1 13C  
 PC 3.33 usec  
 P1 10.00 usec  
 PLM1 41.91400146 W  
 SFO2 600.4224017 MHz  
 NUC2 1H  
 CDEPRG(2) waltz16  
 ECPD2 80.00 usec  
 PLM2 13.51200008 W  
 PLM12 0.30124000 W  
 PLM13 0.15098180 W

F2 - Processing parameters  
 SI 65536  
 SF 150.9797072 MHz  
 WDW EM  
 SSB 0  
 LB 1.00 Hz  
 GB 0  
 PC 1.40

173.90  
171.96

84.92

72.88

68.19

62.00

61.56

34.23

32.80

29.84

29.83

29.80

29.76

29.62

29.55

29.54

29.51

29.48

29.41

29.29

29.27

29.20

28.87

28.62

28.41

28.32

25.03

22.84

18.54

14.26

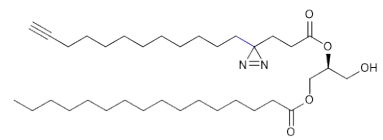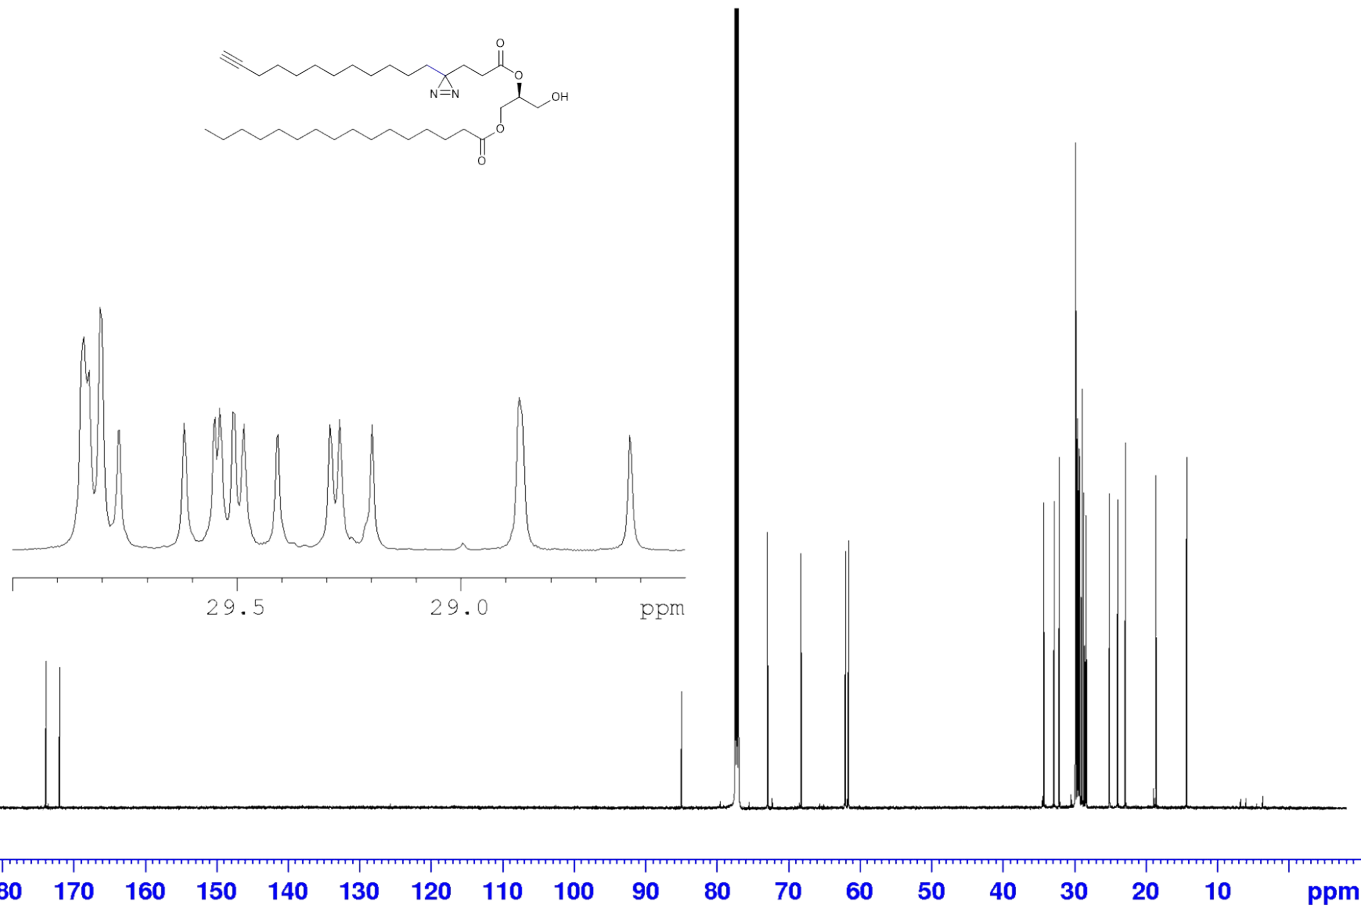

(S)-2-((3-(3-(dodec-11-yn-1-yl)-3H-diazirin-3-yl)propanoyl)oxy)-3-hydroxypropyl palmitate 32  
HRMS

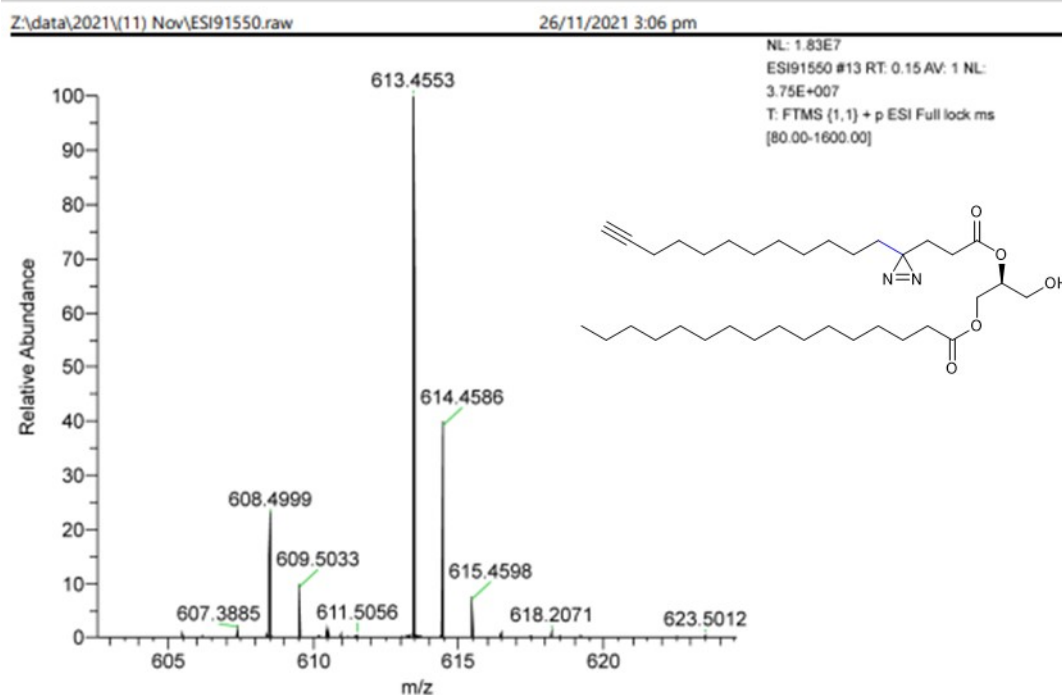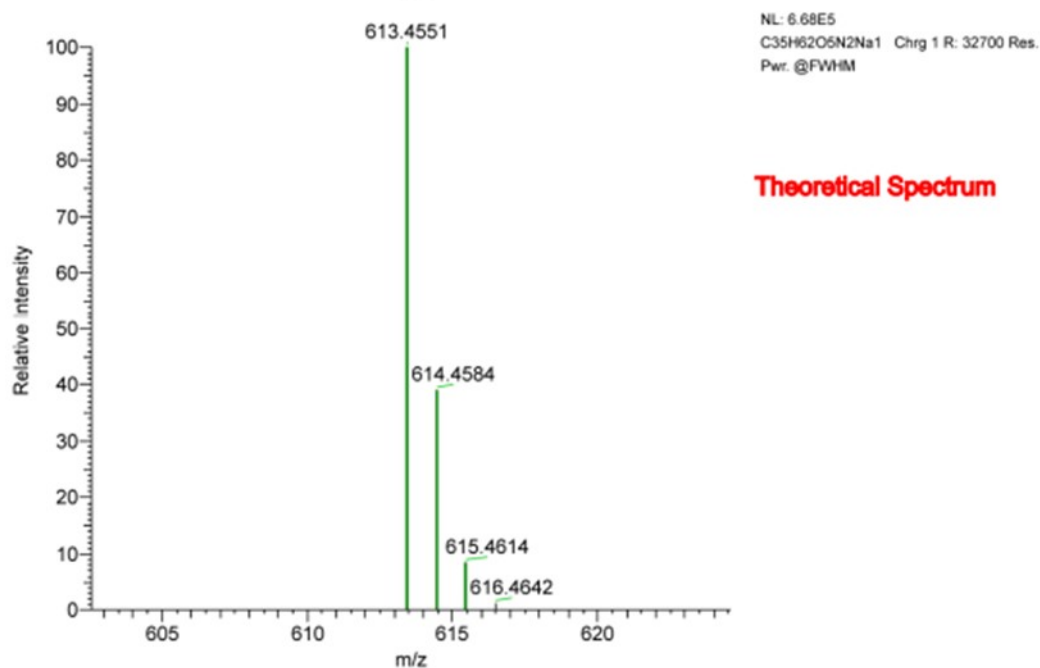

| Peak Mass Display... | Combin... | RDB   | Delta [p... | Theo. m... | Rank   | Combin... | # Match... | # Misse... | MS Cov... | Pattern... | MSMS... |         |
|----------------------|-----------|-------|-------------|------------|--------|-----------|------------|------------|-----------|------------|---------|---------|
| 613.4553             | C...H...  | 22388 | 550         | 0.77       | 613.45 | 1         | 89849      | 4          | 1         | 92597      | 92248   | /Coller |

(2R)-3-(((benzyloxy)(diisopropylamino)phosphaneyl)oxy)-2-((3-(3-(dodec-11-yn-1-yl)-3H-diazirin-3-yl)propanoyl)oxy)propyl palmitate 34 <sup>1</sup>H NMR

Current Data Parameters  
NAME Dec08-2021-22-GB-161 C16 Diaz  
EXPNO 1  
PROCNO 1

F2 - Acquisition Parameters

Date\_ 20211208  
Time\_ 15.30 h  
INSTRUM avh400  
PROBHD Z108618\_0873 (PULPROG zg60  
TD 65536  
SOLVENT CDCl3  
NS 16  
DS 2  
SWH 8012.820 Hz  
FIDRES 0.244532 Hz  
AQ 4.0894465 sec  
RG 88.17  
DW 62.400 usec  
DE 6.50 usec  
TE 298.5 K  
D1 1.00000000 sec  
TD0 1  
SFO1 400.1324008 MHz  
NUC1 1H  
P1 14.00 usec  
PLW1 14.36989888 W

F2 - Processing parameters

SI 32768  
SF 400.1300100 MHz  
WDW EM  
SSB 0  
LB 0.30 Hz  
GB 0  
PC 1.00

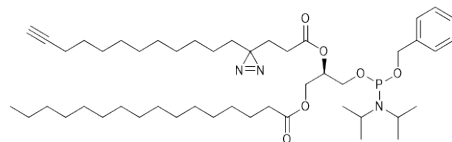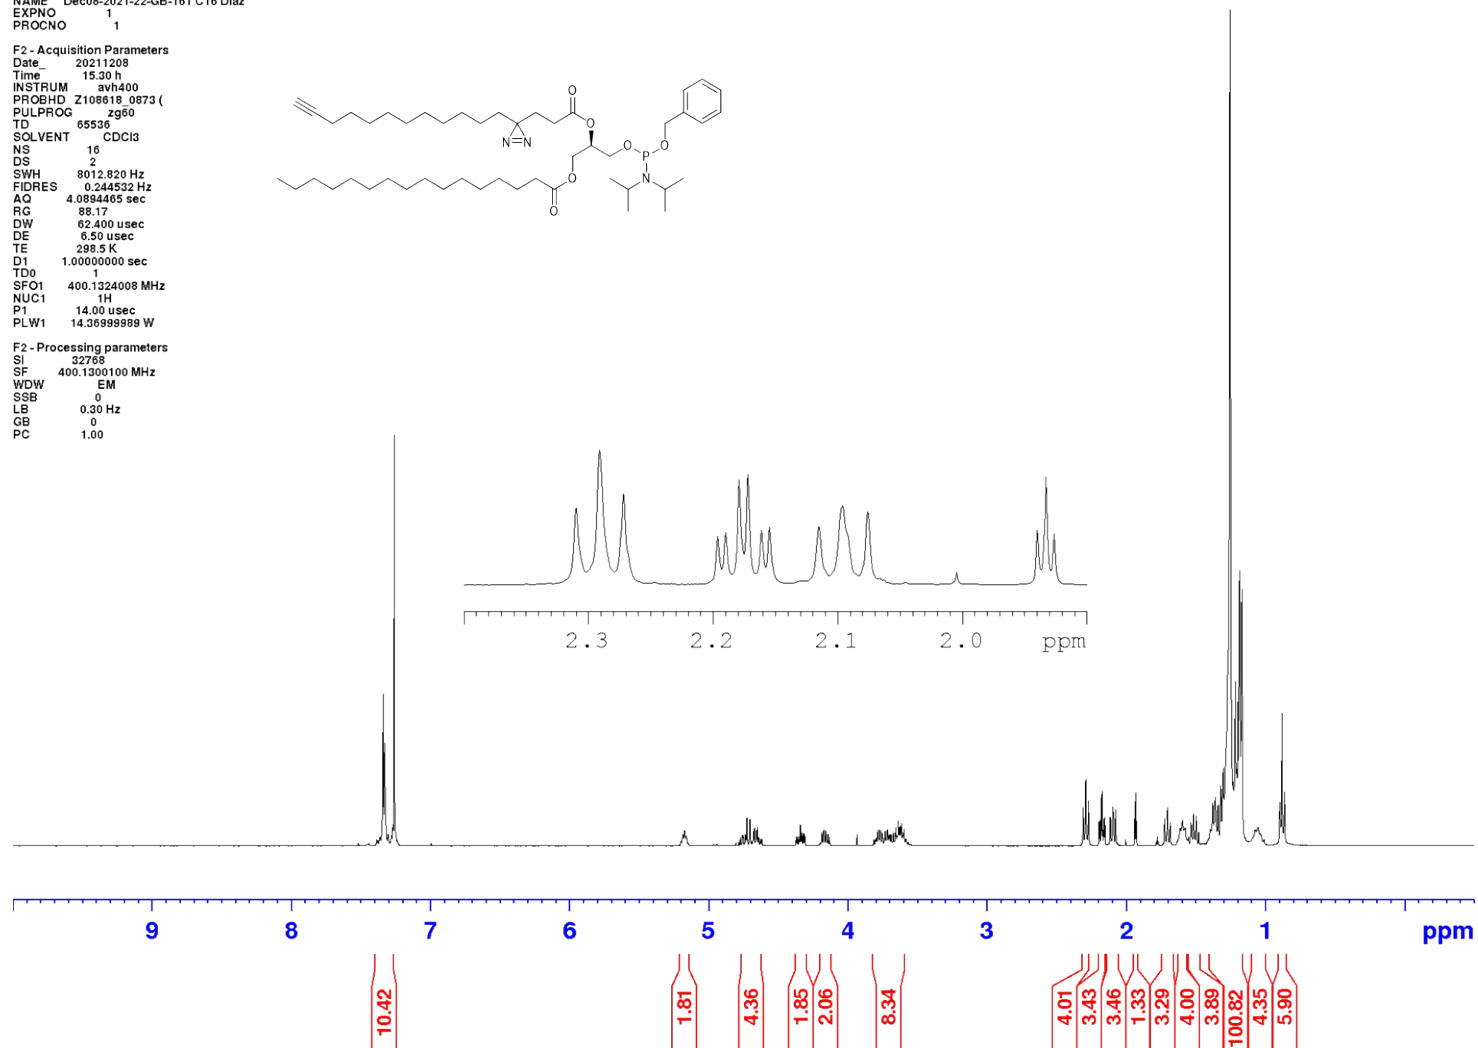

**(2R)-3-(((benzyloxy)(diisopropylamino)phosphanyl)oxy)-2-((3-(3-(dodec-11-yn-1-yl)-3H-diazirin-3-yl)propanoyl)oxy)propyl palmitate 34 <sup>31</sup>P NMR**

```

Current Data Parameters
NAME      Dec08-2021-22-GB-161  C16 Diaz Phosphoramidite
EXPNO    2
PROCNO   1

F2 - Acquisition Parameters
Date_    20211209
Time     23.14 h
INSTRUM  avn400
PROBHD   z108618_0873  i
PULPROG  zgpg30
TD       131072
SOLVENT  CDCl3
NS       16
DS       4
SWH      64102.562 Hz
FIDRES   0.978127 Hz
AQ       1.023616 sec
RG       197.18
DW       7.800 usec
DE       6.50 usec
TE       299.7 K
D1       2.0000000 sec
D11      0.0300000 sec
TDS      1
SFO1     161.9755930 MHz
NUC1     31P
FO       5.00 usec
F1       15.00 usec
PLW1     13.93799973 W
SFO2     400.1316005 MHz
NUC2     1H
CPDPRG2  waltz16
PCPDG    90.00 usec
PLW2     14.36999989 W
PLW12    0.34772000 W
PLW13    0.17480000 W

F2 - Processing parameters
SI       65536
SF       161.9755930 MHz
WDW      EM
SSB      0
LB       1.00 Hz
GB       0
PC       1.40
    
```

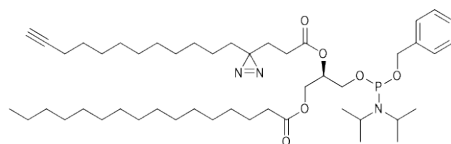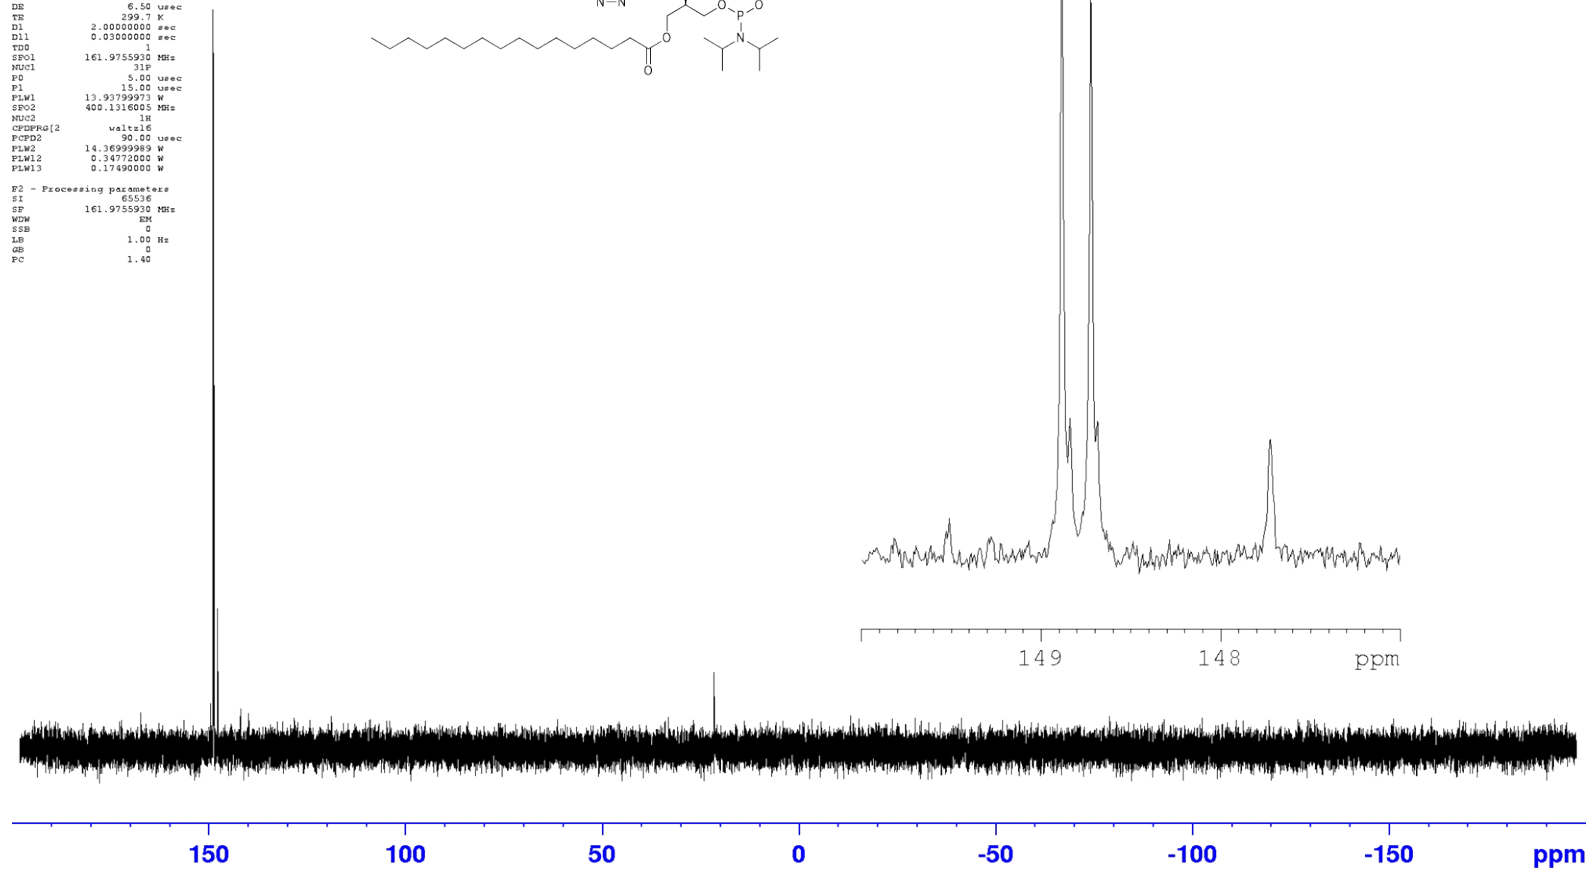

**(2R)-3-(((benzyloxy)(diisopropylamino)phosphaneyl)oxy)-2-((3-(3-(dodec-11-yn-1-yl)-3H-diazirin-3-yl)propanoyl)oxy)propyl palmitate 34 HRMS**

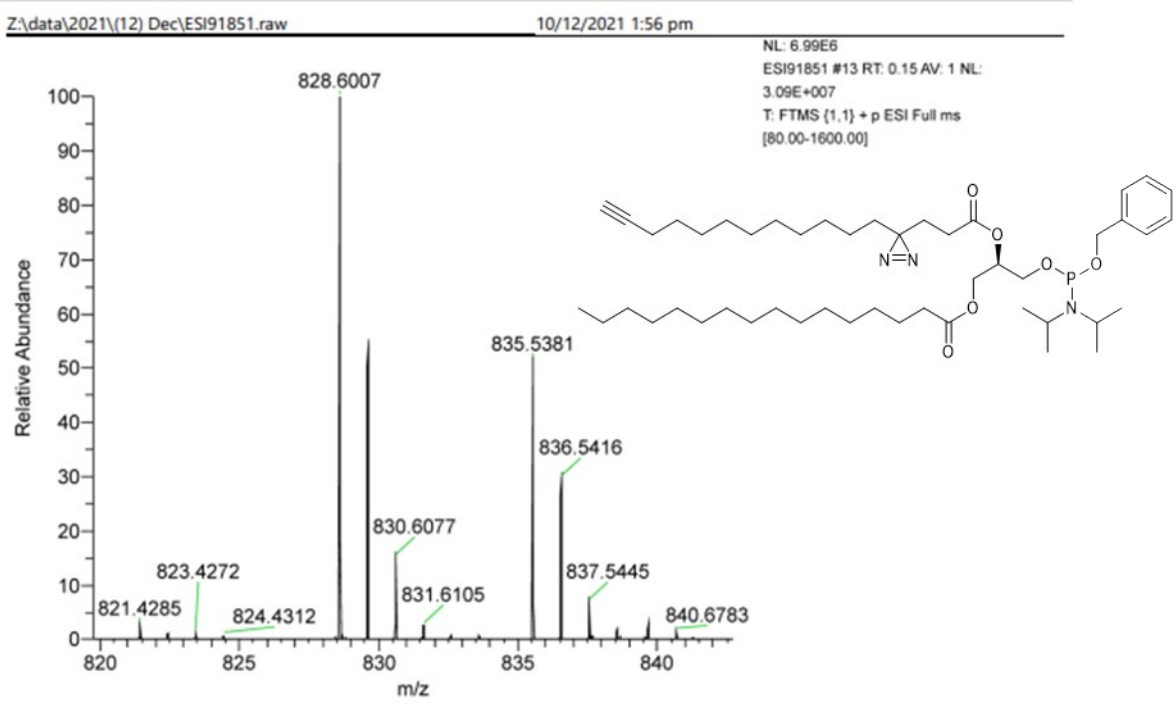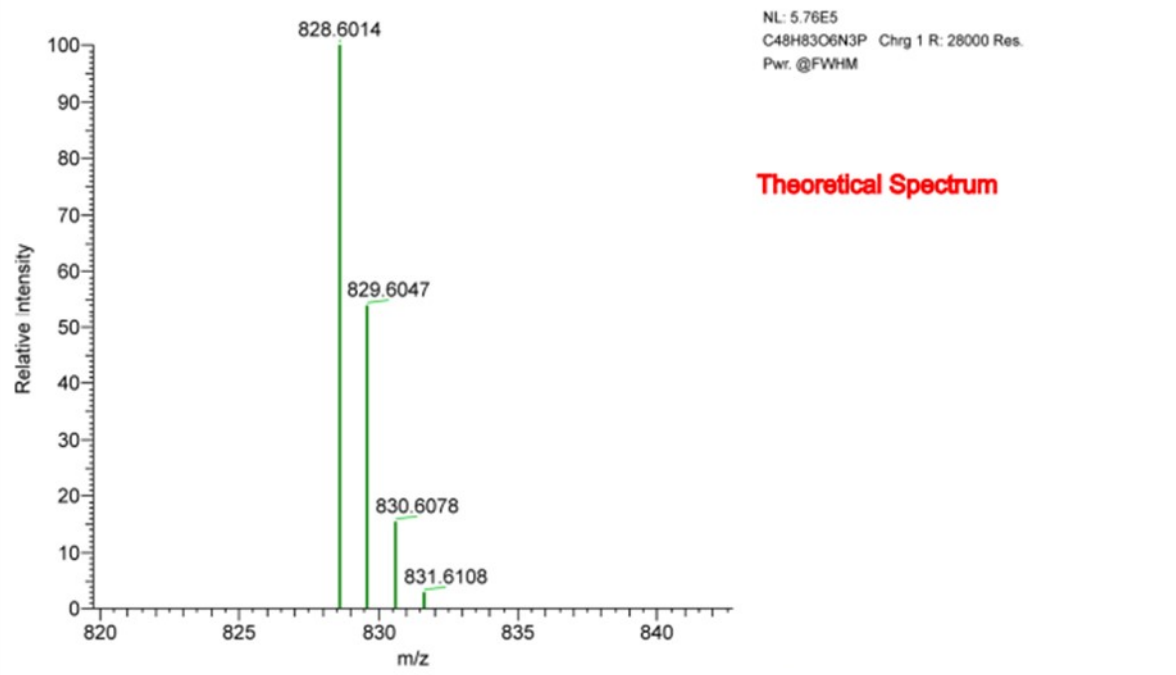

| Peak Mass Display... | Combin... | RDB | Delta [p... | Theo. m... | Rank | Combin... | # Match... | # Misse... | MS Cov... | Pattern... | MSMS... |        |     |
|----------------------|-----------|-----|-------------|------------|------|-----------|------------|------------|-----------|------------|---------|--------|-----|
| 828.6007             | C...      | 50  | 519         | 9.50       | 0.84 | 828.60    | 1          | 96.848     | 4         | 1          | 99.477  | 99.779 | 1/1 |

**(+)-(2R)-3-(((Benzyloxy)(((3aR,4R,5S,6R,7S,7aR)-4,6-bis((4-methoxybenzyl)oxy)-5-((3-oxido-1,5-dihydrobenzo[e][1,3,2]dioxaphosphepin-3-yl)oxy)hexahydrospiro[benzo[d][1,3]dioxole-2,1'-cyclopentan]-7-yl)oxy)phosphoryl)oxy)-2-((3-(3-(dodec-11-yn-1-yl)-3H-diazirin-3-yl)propanoyl)oxy)propyl palmitate (+)-35 <sup>1</sup>H NMR**

Current Data Parameters  
 NAME g1666672005 (ProtectedC16 Diaz inositol)  
 EXPNO 1  
 PROCNO 1

F2 - Acquisition Parameters  
 Date\_ 20220523  
 Time 19:28 h  
 INSTRUM Avance  
 PROBHD Z169656\_0020 (PULPROB  
 PULPROB zgpg30  
 TD 65536  
 SOLVENT CDCl3  
 NS 16  
 DS 2  
 SWH 11904.762 Hz  
 FIDRES 0.363304 Hz  
 AQ 2.7525120 sec  
 RG 41.4305  
 DW 42.000 usec  
 DE 22.00 usec  
 TE 298.0 K  
 D1 1.00000000 sec  
 TD0 1  
 SFO1 600.4230021 MHz  
 NUC1 1H  
 PD 4.00 usec  
 P1 12.00 usec  
 PLW1 13.51200000 W

F2 - Processing parameters  
 SI 65536  
 SF 600.4230148 MHz  
 WDW EM  
 SSB 0  
 LB 0.30 Hz  
 GB 0  
 PC 1.00

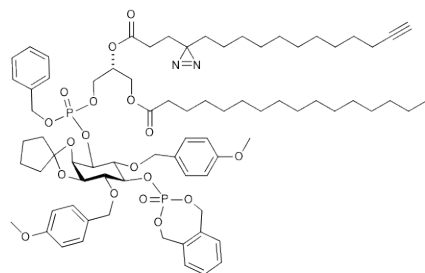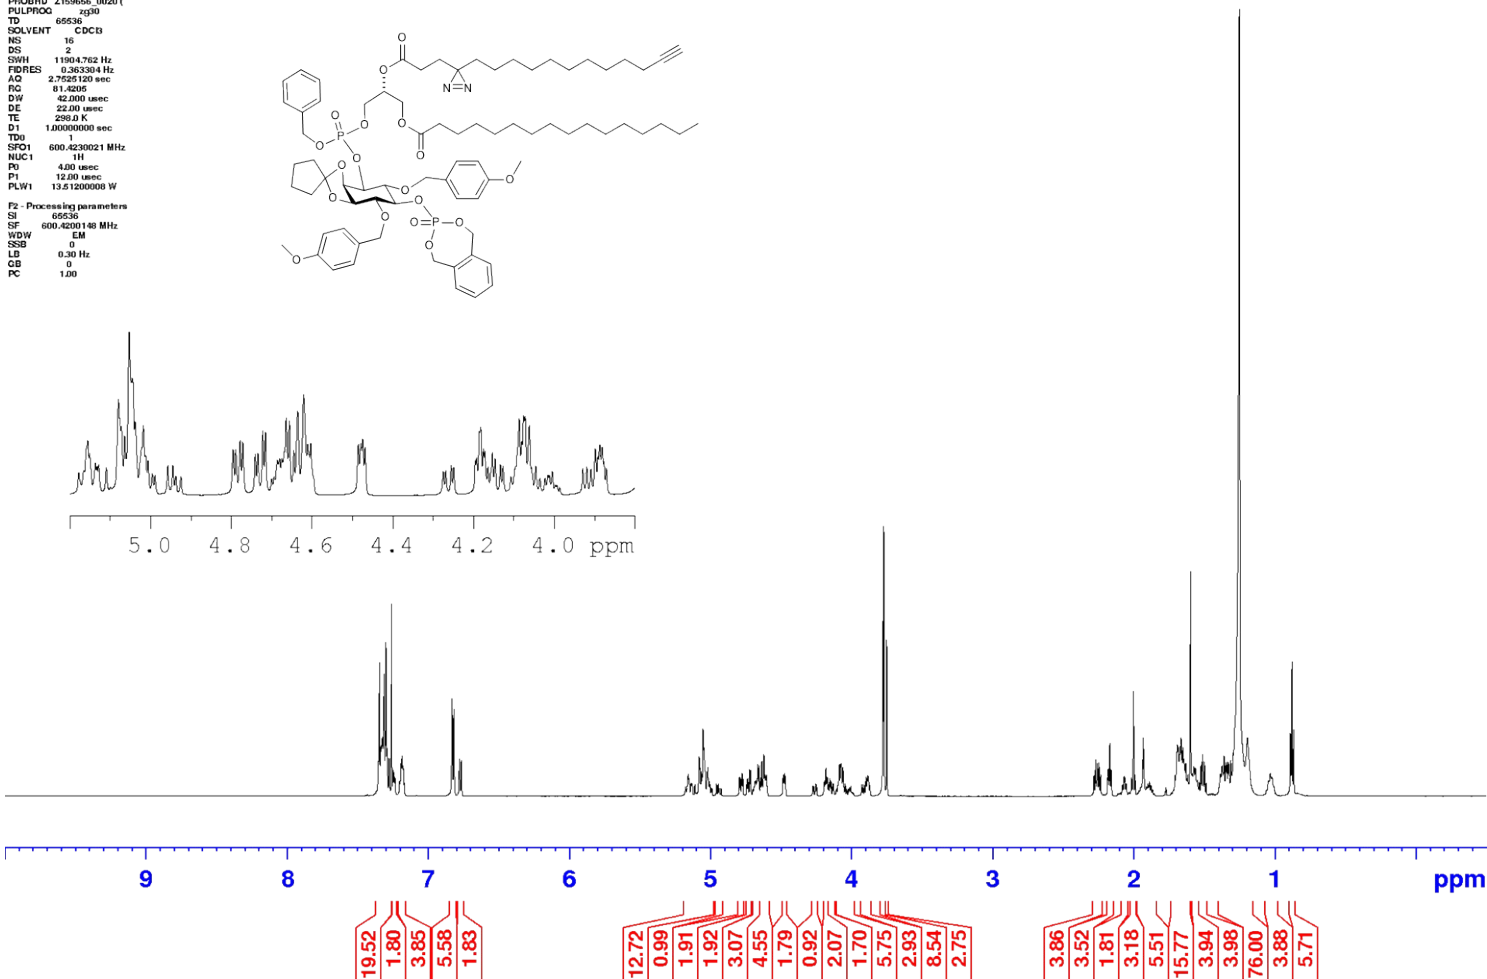

**(+)-(2R)-3-(((Benzyloxy)(((3aR,4R,5S,6R,7S,7aR)-4,6-bis((4-methoxybenzyl)oxy)-5-((3-oxido-1,5-dihydrobenzo[e][1,3,2]dioxaphosphepin-3-yl)oxy)hexahydrospiro[benzo[d][1,3]dioxole-2,1'-cyclopentan]-7-yl)oxy)phosphoryl)oxy)-2-((3-(3-(dodec-11-yn-1-yl)-3H-diazirin-3-yl)propanoyl)oxy)propyl palmitate (+)-35 <sup>31</sup>P NMR**

Current Data Parameters  
 NAME gb666672005 (Protected C16 Diaz inositol)  
 EXPNO 6  
 PROCNO 1

F2 - Acquisition Parameters  
 Date\_ 20220523  
 Time 19.39 h  
 INSTRUM Avance  
 PROBHD z159e56\_0020 (1  
 PULPROG zgpg30  
 TD 65536  
 SOLVENT CDCl3  
 NS 16  
 DS 4  
 SWH 48543.688 Hz  
 FIDRES 1.481436 Hz  
 AQ 0.6750208 sec  
 RG 101  
 DW 10.300 usec  
 DE 18.00 usec  
 TE 298.0 K  
 D1 2.0000000 sec  
 D11 0.0300000 sec  
 TD0 1  
 SFO1 243.0423184 MHz  
 NUC1 31P  
 FO 4.00 usec  
 F1 12.00 usec  
 FLM1 39.40800000 M  
 SFO2 600.4224017 MHz  
 NUC2 1H  
 CTDPRG2 waltz16  
 PCPD2 80.00 usec  
 PLM2 13.51200008 M  
 PLM12 0.30124050 M  
 PLM13 0.15098180 M

F2 - Processing parameters  
 SI 32768  
 SF 243.0544711 MHz  
 NH 64  
 SEB 0  
 LB 1.00 Hz  
 GB 0  
 PC 1.40

-0.64  
 -0.67  
 -1.86  
 -1.97

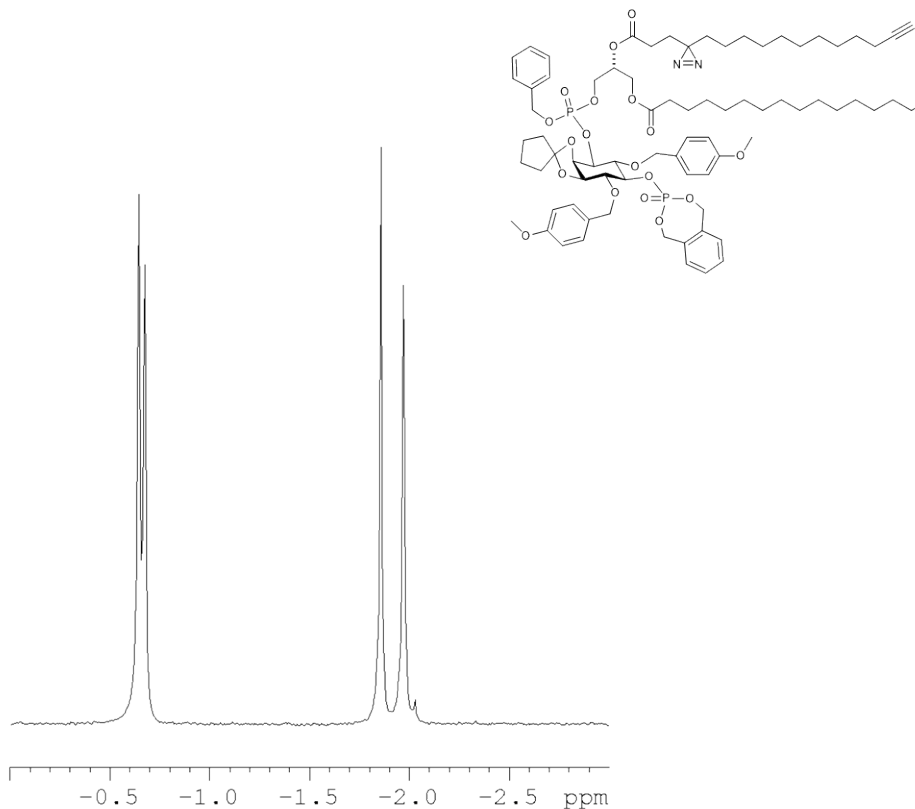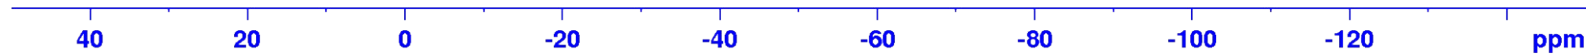

**(+)-(2R)-3-(((Benzyloxy)(((3aR,4R,5S,6R,7S,7aR)-4,6-bis((4-methoxybenzyl)oxy)-5-((3-oxido-1,5-dihydrobenzo[e][1,3,2]dioxaphosphepin-3-yl)oxy)hexahydrospiro[benzo[d][1,3]dioxole-2,1'-cyclopentan]-7-yl)oxy)phosphoryl)oxy)-2-((3-(3-(dodec-11-yn-1-yl)-3H-diazirin-3-yl)propanoyl)oxy)propyl palmitate (+)-35 <sup>13</sup>C NMR**

Current Data Parameters  
 NAME gb66672005 (Protected C16 Diast inositol)  
 EXPNO 5  
 PROCNO 1

F2 - Acquisition Parameters  
 Date\_ 15 03 2020  
 Time 14.37  
 INSTRUM spect  
 PROCNO 5  
 PULPROG zgpg30  
 TE 300.2

SOLVENT 1  
 NS 212  
 DS 4  
 SWH 35714.285 Hz  
 FIDRES 1.089913 Hz  
 AQ 0.9175040 sec  
 RG 101  
 DM 14.000 usec  
 DE 18.00 usec  
 TE 298.0 K  
 D1 2.0000000 sec  
 D11 0.0300000 sec  
 TDO 1  
 SFO1 150.9923364 MHz  
 NUC1 13C  
 PD 3.33 usec  
 P1 10.00 usec  
 PLM1 41.91400146 W  
 SFO2 600.4224017 MHz  
 NUC2 1H  
 CDEPRG(2) waltz16  
 ECPD2 80.00 usec  
 PLM2 13.51200008 W  
 PLM12 0.30124050 W  
 PLM13 0.15098180 W

F2 - Processing parameters  
 SI 65536  
 SF 150.9757085 MHz  
 WHW 8M  
 SSB 0  
 LB 1.00 Hz  
 GB 0  
 PC 1.40

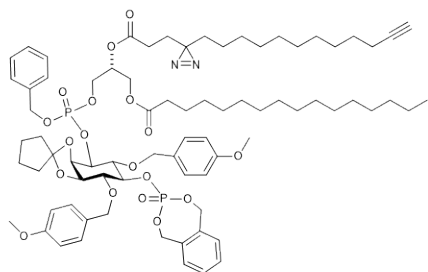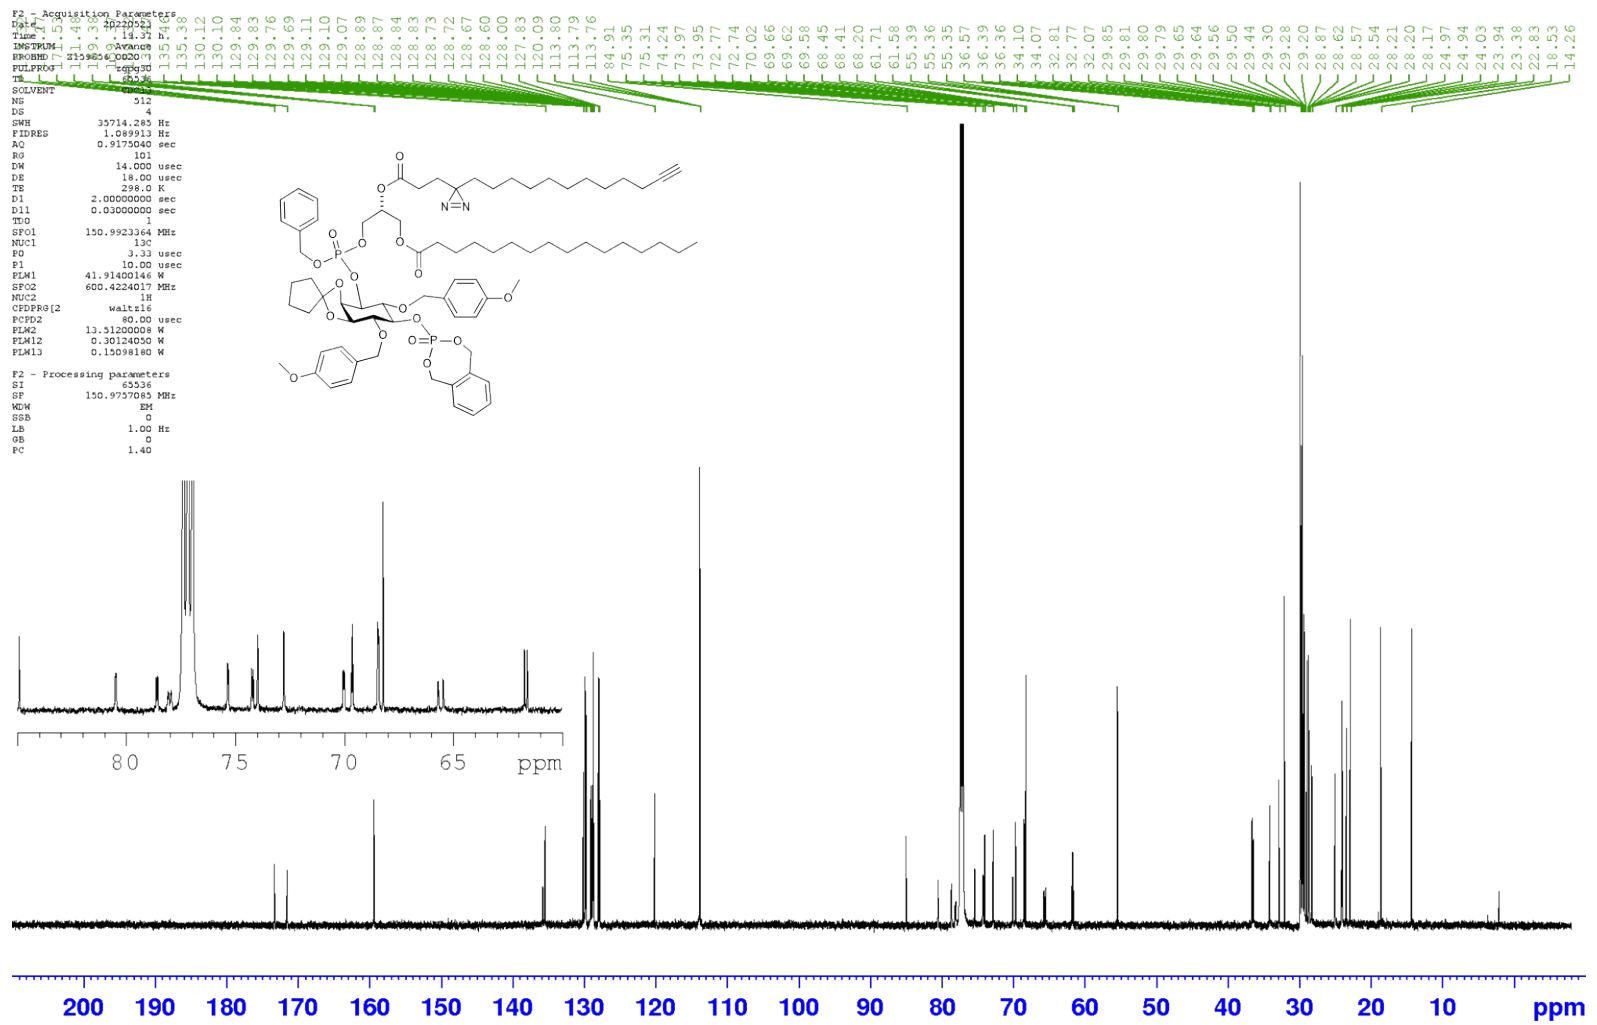

(+)-(2*R*)-3-(((Benzyloxy)(((3*aR*,4*R*,5*S*,6*R*,7*S*,7*aR*)-4,6-bis((4-methoxybenzyl)oxy)-5-((3-oxido-1,5-dihydrobenzo[*e*][1,3,2]dioxaphosphepin-3-yl)oxy)hexahydrospiro[benzo[*d*][1,3]dioxole-2,1'-cyclopentan]-7-yl)oxy)phosphoryl)oxy)-2-((3-(3-(dodec-11-yn-1-yl)-3*H*-diazirin-3-yl)propanoyl)oxy)propyl palmitate (+)-35

HPLC 280nm

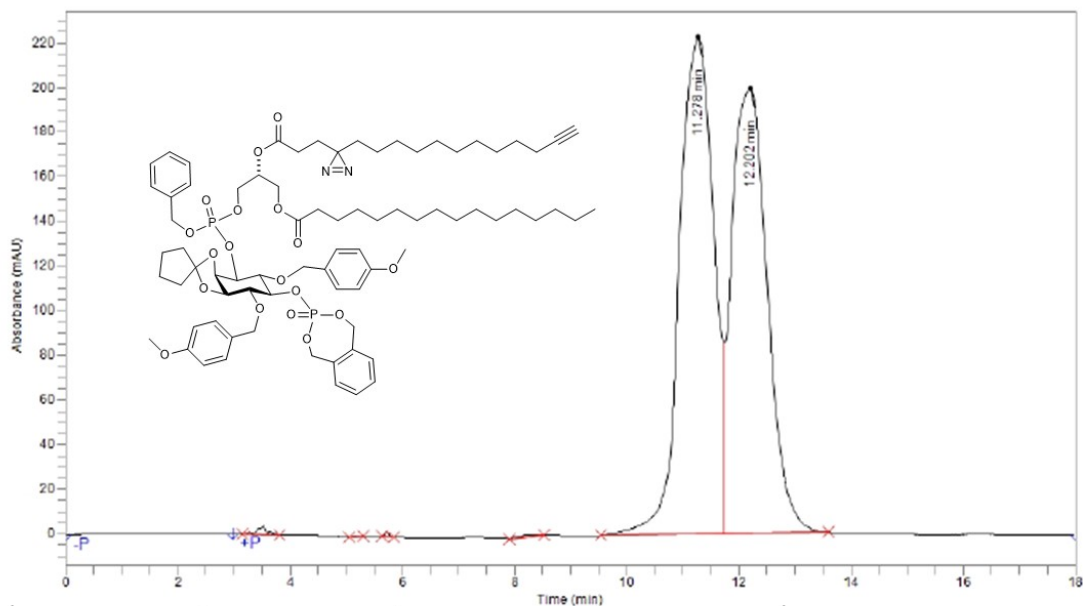

| Time         | Height    | Area         | Area % |
|--------------|-----------|--------------|--------|
| 3.277        | 875.6     | 4,641.7      | 0.03   |
| 3.536        | 3,577.9   | 31,004.7     | 0.17   |
| 3.634        | 1,172.9   | 6,234.2      | 0.03   |
| 5.162        | 546.7     | 3,752.2      | 0.02   |
| 5.722        | 2,163.9   | 10,848.1     | 0.06   |
| 8.419        | 419.9     | 25,820.5     | 0.14   |
| 11.278       | 222,879.7 | 9,439,156.3  | 51.54  |
| 12.202       | 199,256.7 | 8,792,337.5  | 48.01  |
| <b>Total</b> |           | 18,313,795.1 | 100.00 |

(+)-(2*R*)-3-(((Benzyloxy)(((3*aR*,4*R*,5*S*,6*R*,7*S*,7*aR*)-4,6-bis((4-methoxybenzyl)oxy)-5-((3-oxido-1,5-dihydrobenzo[*e*][1,3,2]dioxaphosphepin-3-yl)oxy)hexahydrospiro[benzo[*d*][1,3]dioxole-2,1'-cyclopentan]-7-yl)oxy)phosphoryl)oxy)-2-((3-(3-(dodec-11-yn-1-yl)-3*H*-diazirin-3-yl)propanoyl)oxy)propyl palmitate (+)-35

HPLC 254nm

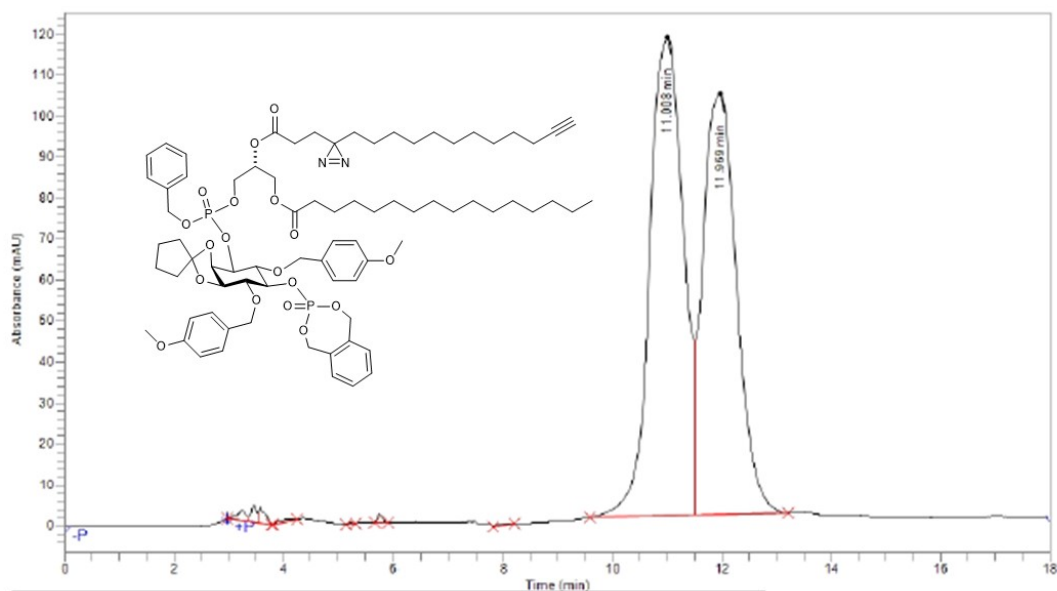

| Time         | Height    | Area               | Area %        |
|--------------|-----------|--------------------|---------------|
| 3.266        | 2,471.9   | 29,013.9           | 0.30          |
| 3.473        | 4,153.9   | 30,649.7           | 0.32          |
| 3.586        | 3,855.9   | 30,122.2           | 0.32          |
| 4.194        | 245.7     | 9,503.5            | 0.10          |
| 5.241        | 236.7     | 1,224.2            | 0.01          |
| 5.765        | 2,005.5   | 11,704.4           | 0.12          |
| 8.112        | 231.2     | 7,705.9            | 0.08          |
| 11.008       | 116,975.3 | 4,977,390.4        | 52.24         |
| 11.969       | 102,803.8 | 4,430,765.5        | 46.50         |
| <b>Total</b> |           | <b>9,528,079.6</b> | <b>100.00</b> |

(+)-(2R)-3-(((Benzyloxy)(((3aR,4R,5S,6R,7S,7aR)-4,6-bis((4-methoxybenzyl)oxy)-5-((3-oxido-1,5-dihydrobenzo[e][1,3,2]dioxaphosphepin-3-yl)oxy)hexahydrospiro[benzo[d][1,3]dioxole-2,1'-cyclopentan]-7-yl)oxy)phosphoryl)oxy)-2-((3-(3-(dodec-11-yn-1-yl)-3H-diazirin-3-yl)propanoyl)oxy)propyl palmitate (+)-35 HRMS

Z:\data\2022\02 (Feb)\ESI92955.raw

21/02/2022 4:02 pm

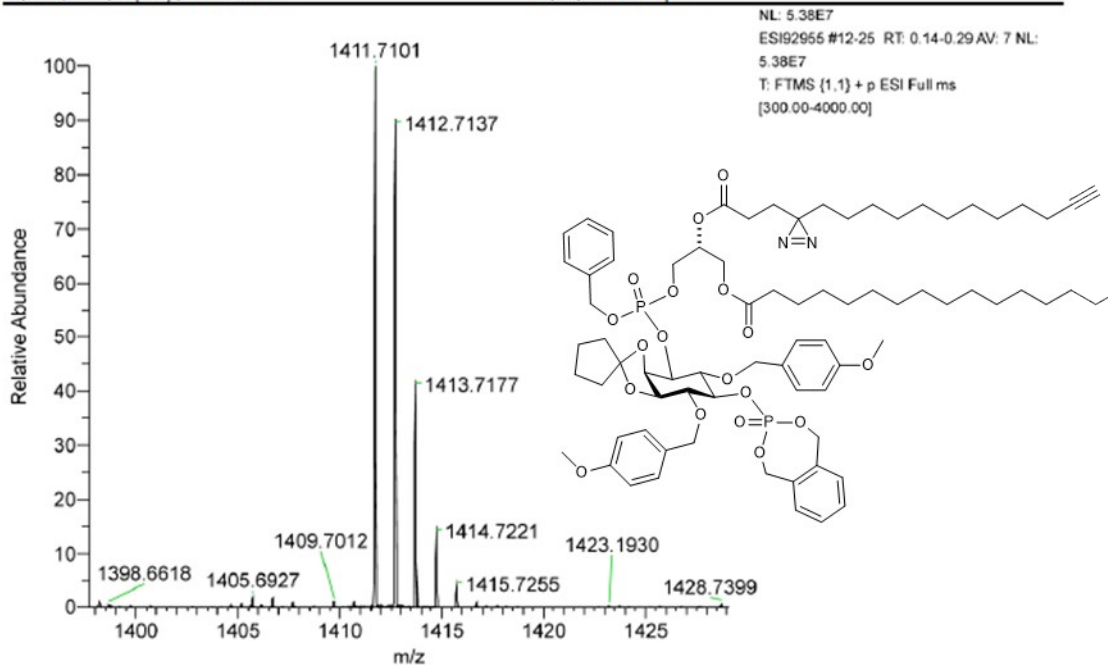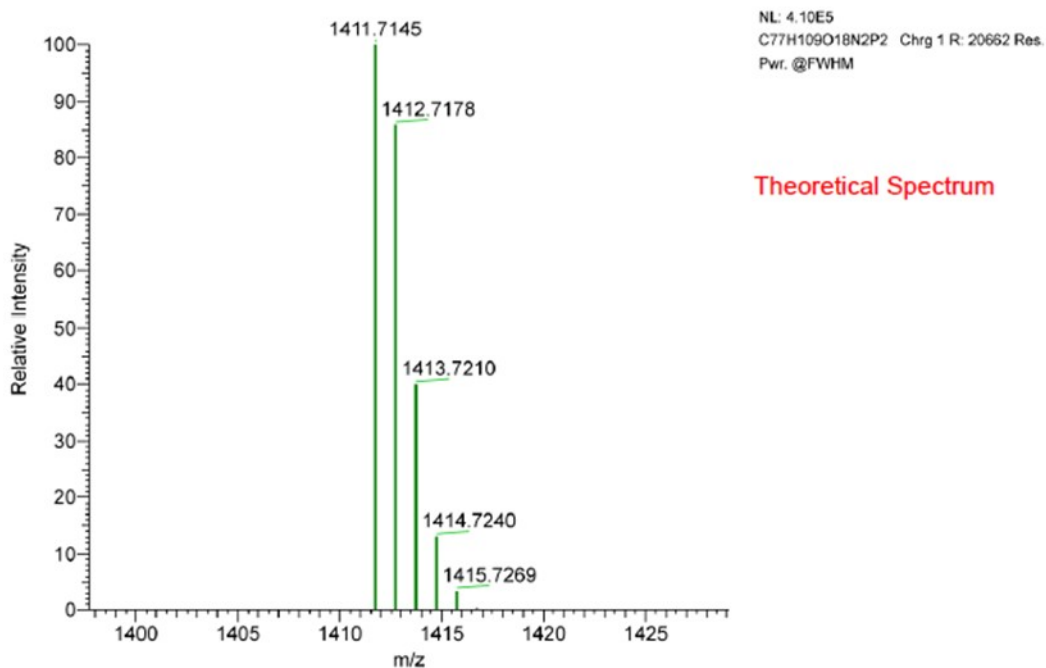

| Peak Mass Display... | Combin... | RDB    | Delta (p... | Theo. m... | Rank   | Combin... | # Match... | # Misse... | MS Cov... | Pattern... | MSMS... |         |
|----------------------|-----------|--------|-------------|------------|--------|-----------|------------|------------|-----------|------------|---------|---------|
| 1411.7               | C...H...  | 50.588 | 25.50       | -3.12      | 1411.7 | 1         | 94.616     | 7          | 0         | 97.062     | 99.917  | IColler |

**Ammonium (1S,2R,3R,4R,5R,6R)-3-(((R)-2-((3-(3-(dodec-11-yn-1-yl)-3H-diazirin-3-yl)propanoyl)oxy)-3-(palmitoyloxy)propoxy)oxidophosphoryl)oxy)-2,4,5,6-tetrahydroxycyclohexyl phosphate 9 <sup>1</sup>H NMR**

Current Data Parameters  
 NAME gb669431406 (C16 Diaz inositol)  
 EXPNO 1  
 PROCNO 1

F2 - Acquisition Parameters  
 Date 20220614  
 Time 10.18 h  
 INSTRUM Avance  
 PROBHD Z159856 0020 (zq30)  
 PULPROG zg30  
 TD 65536  
 SOLVENT MeOD  
 NS 16  
 DS 2  
 SWH 11904.762 Hz  
 FIDRES 0.363304 Hz  
 AQ 2.7525120 sec  
 RG 85.9444  
 DW 42.000 usec  
 DE 22.00 usec  
 TE 298.0 K  
 D1 1.00000000 sec  
 TD0 1  
 SFO1 600.4230021 MHz  
 NUC1 <sup>1</sup>H  
 P0 4.00 usec  
 P1 12.00 usec  
 PLW1 13.51200008 W

F2 - Processing parameters  
 SI 65536  
 SF 600.4200117 MHz  
 WDW EM  
 SSB 0  
 LB 0.30 Hz  
 GB 0  
 PC 1.00

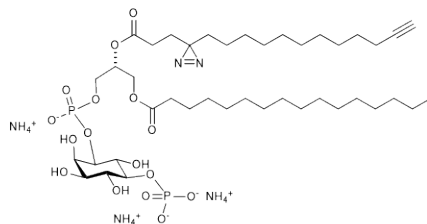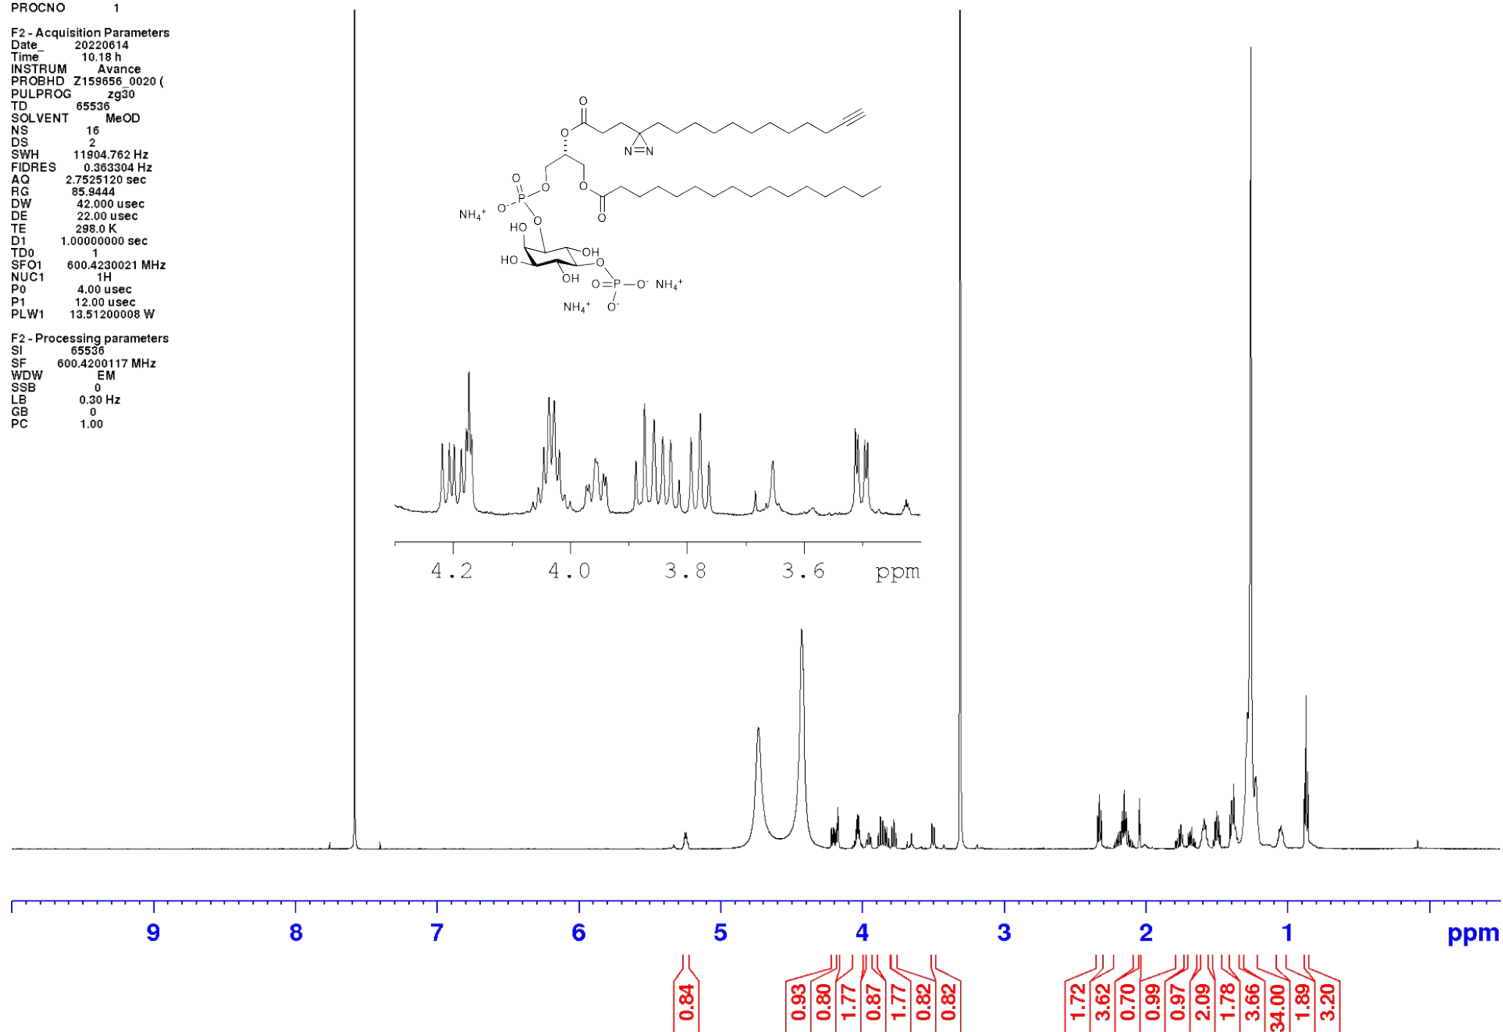

**Ammonium (1S,2R,3R,4R,5R,6R)-3-(((R)-2-((3-(3-(dodec-11-yn-1-yl)-3H-diazirin-3-yl)propanoyl)oxy)-3-(palmitoyloxy)propoxy)oxidophosphoryl)oxy)-2,4,5,6-tetrahydroxycyclohexyl phosphate 9 <sup>31</sup>P NMR**

Current Data Parameters  
 NAME gbb69431406 (C16 Diaz inositol)  
 EXPNO 9  
 PROCNO 1

F2 - Acquisition Parameters  
 Date\_ 20220614  
 Time 17.14 h  
 INSTRUM Avance  
 PROBHD 219656\_0020 (zpg30)  
 PULPROG zgpg30  
 TD 65536  
 SOLVENT MeOD  
 NS 64  
 DS 4  
 SWH 48543.688 Hz  
 FIDRES 1.481436 Hz  
 AQ 0.6750208 sec  
 RG 101  
 DM 10.300 usec  
 DE 18.00 usec  
 TE 298.0 K  
 D1 2.0000000 sec  
 D11 0.0300000 sec  
 TD0 1  
 SFO1 243.0423184 MHz  
 NUC1 <sup>31</sup>P  
 FO 4.00 usec  
 FI 12.00 usec  
 PLM1 39.4080095 W  
 SFO2 600.4224017 MHz  
 NUC2 <sup>1</sup>H  
 CDFPR2 waltz16  
 PCPD2 80.00 usec  
 PLM2 13.5120008 W  
 PLM12 0.30124050 W  
 PLM13 0.15068180 W

F2 - Processing parameters  
 SI 32768  
 SF 243.0544711 MHz  
 WDW EM  
 SSB 0  
 LB 1.00 Hz  
 GB 0  
 PC 1.40

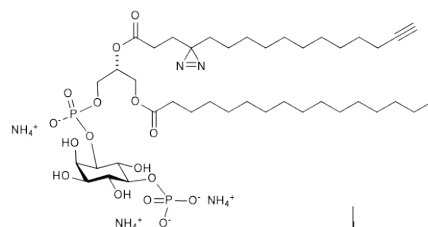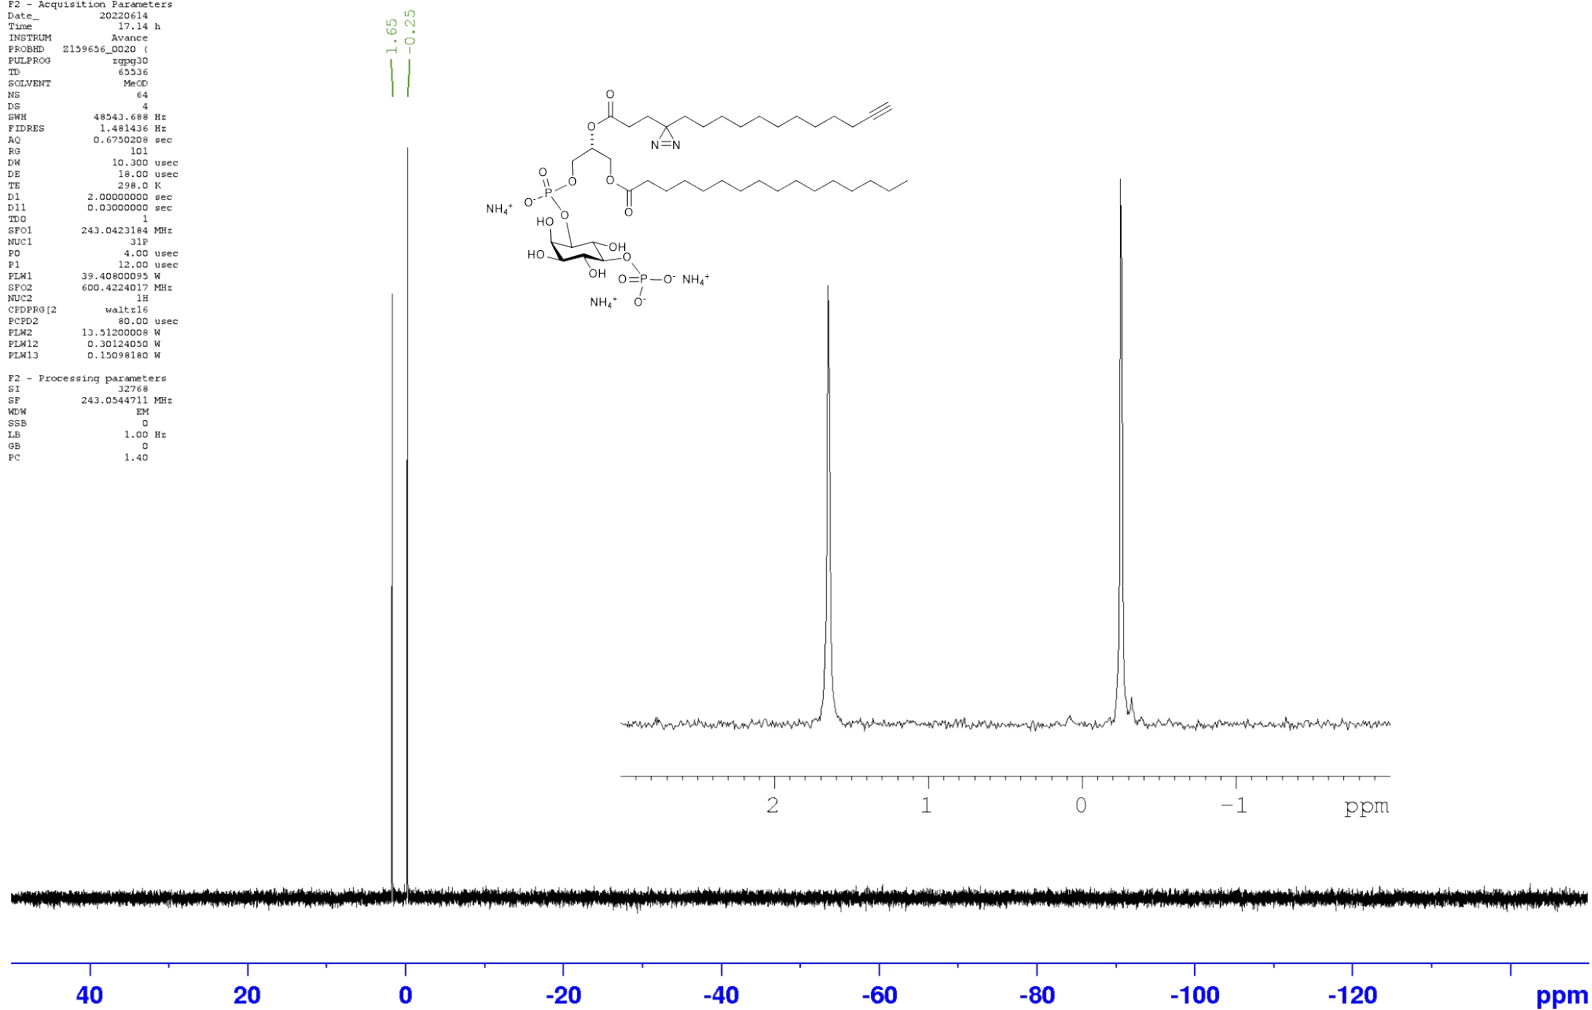

**Ammonium (1S,2R,3R,4R,5R,6R)-3-(((R)-2-((3-(3-(dodec-11-yn-1-yl)-3H-diazirin-3-yl)propanoyl)oxy)-3-(palmitoyloxy)propoxy)oxidophosphoryl)oxy)-2,4,5,6-tetrahydroxycyclohexyl phosphate 9 <sup>13</sup>C NMR**

Current Data Parameters  
 NAME g0669431406 (C16 Diaz inositol)  
 EXPNO 7  
 PROCNO 1

F2 - Acquisition Parameters  
 Date\_ 20220614  
 Time 17.02 h  
 INSTRUM Avance  
 PROBHD z159e56\_0020 (zpgpg30)  
 PULPROG zgpg30  
 TD 65536  
 SOLVENT H<sub>2</sub>O  
 NS 4195  
 DS 4  
 SWH 35714.283 Hz  
 FIDRES 1.089913 Hz  
 AQ 0.9175040 sec  
 RG 101  
 DM 14.000 usec  
 DE 18.00 usec  
 TE 298.0 K  
 D1 2.0000000 sec  
 D11 0.03000000 sec  
 TD0 1  
 SFO1 150.9923364 MHz  
 NUC1 13C  
 FO 3.33 usec  
 F1 10.00 usec  
 PLM1 41.91400146 W  
 SFO2 600.4224017 MHz  
 NUC2 1H  
 CDEPRG(2) Waltz16  
 PCDE2 80.00 usec  
 PLM2 13.51200008 W  
 PLM12 0.30124050 W  
 PLM13 0.15098180 W

F2 - Processing Parameters  
 SI 131072  
 SF 150.9756054 MHz  
 MDW EM  
 SSB 0  
 LB 2.00 Hz  
 GB 0  
 PC 1.40

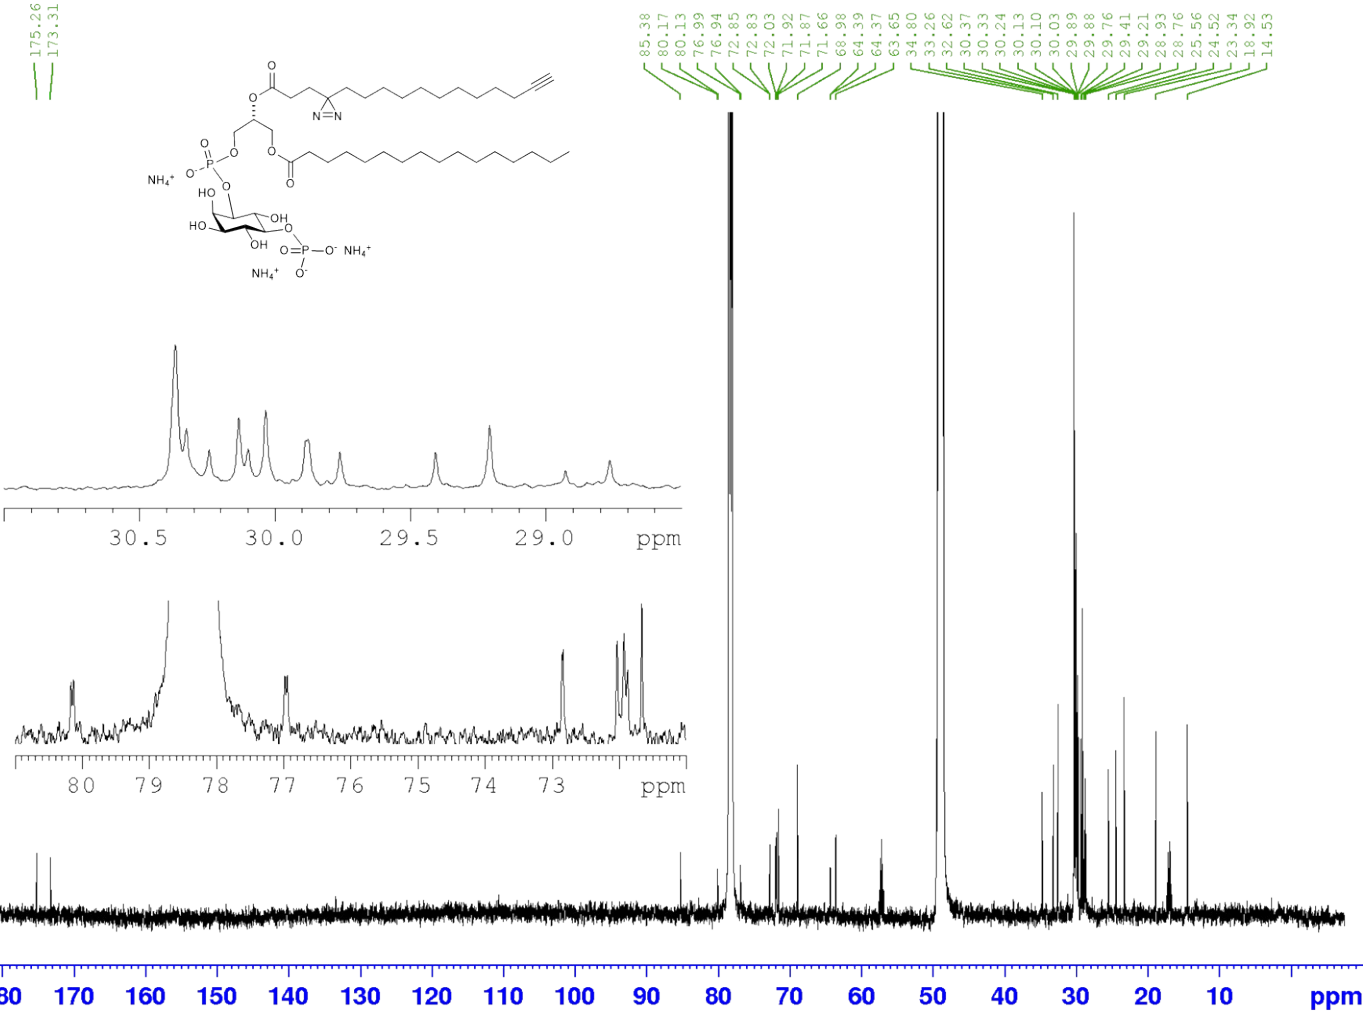

**Ammonium (1S,2R,3R,4R,5R,6R)-3-((((R)-2-(((3-(dodec-11-yn-1-yl)-3H-diazirin-3-yl)propanoyl)oxy)-3-(palmitoyloxy)propoxy)oxidophosphoryl)oxy)-2,4,5,6-tetrahydrocyclohexyl phosphate 9 <sup>1</sup>H to <sup>13</sup>C HSQC NMR**

Current Data Parameters  
 NAME gb669431406 (C16 Diaz inositol)  
 EXPNO 2  
 PROCNO 1

F2 - Acquisition Parameters  
 Date\_ 20220914  
 Time 10:41 h  
 INSTRUM Avance  
 PROBHD Z130859 0020 (1  
 PULPROG zgpg30  
 TD 2048

SOLVENT MeOD  
 NS 4  
 DS 16  
 SWH 7142.857 Hz  
 FIDRES 0.875448 Hz  
 AQ 0.143390 sec  
 RG 101  
 DW 70.000 usec  
 DE 22.000 usec  
 TE 295.0 K  
 CNST2 145.0000000  
 D0 0.0000000 sec  
 D1 1.0000000 sec  
 D4 0.00172414 sec  
 D11 0.0000000 sec  
 D18 0.00010000 sec  
 D21 0.00000000 sec  
 INO 0.0000000 sec

TDav 1  
 ZGPGTNS  
 SFO1 600.4200021 MHz  
 NUC1 1H  
 P1 12.00 usec  
 R2 24.00 usec  
 PLW1 13.51200008 W  
 SFO2 130.857071 MHz  
 NUC2 13C  
 CPDPRG2 garp  
 P3 10.00 usec  
 P14 500.00 usec  
 P31 1730.00 usec  
 PCPD2 55.00 usec  
 PLW0 0 W  
 PLW2 41.81400149 W  
 PLW12 1.38558897 W  
 SPNAM[3] Crp90.0.5.20.1  
 SFOA L3 0.300  
 SFOFFS3 0 Hz  
 SPW3 6.400000051 W  
 SPNAM[18] Crp90\_xfilt2  
 SFOA L18 0.300  
 SFOFFS18 0 Hz  
 SPW18 1.880000005 W  
 GPNAM[1] SMSG10.100  
 GZ1 80.00 %  
 GPNAM[2] SMSG10.100  
 GZ2 20.10 %  
 P18 1000.00 usec

===== F1 INDIRECT DIMENSION =====  
 td1 256  
 sw\_F1 184.066352

F1 - Acquisition parameters  
 TD 256  
 SFO1 150.8578 MHz  
 FIDRES 18.843417 Hz  
 SW 185.000 ppm  
 FaMODE Echo-Antiecho

F2 - Processing parameters  
 SI 2048  
 SF 600.4200000 MHz  
 WDW CSINE  
 SSB 2  
 LB 0 Hz  
 GB 0  
 RC 1.00

F1 - Processing parameters  
 SI 1024  
 MC2 echo-antiecho  
 SF 150.857291 MHz  
 WDW CSINE  
 SSB 2  
 LB 0 Hz  
 GB 0

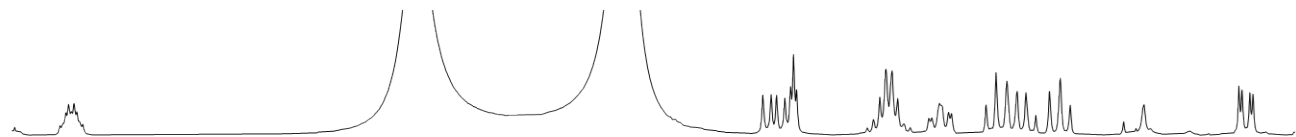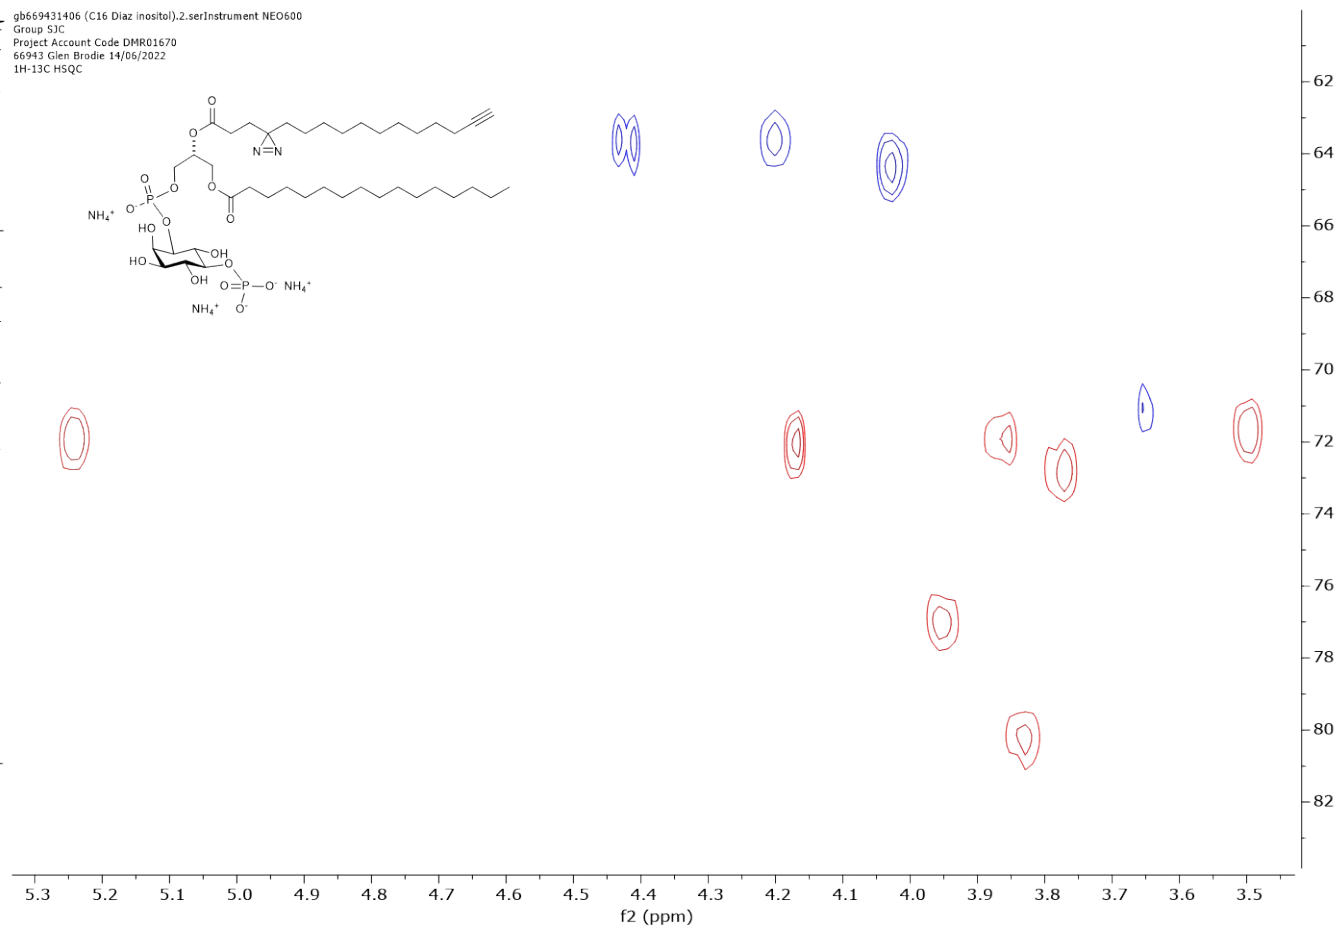

**Ammonium (1S,2R,3R,4R,5R,6R)-3-(((R)-2-((3-(3-(dodec-11-yn-1-yl)-3H-diazirin-3-yl)propanoyl)oxy)-3-(palmitoyloxy)propoxy)oxidophosphoryl)oxy)-2,4,5,6-tetrahydrocyclohexyl phosphate 9 HRMS**

Z:\data\2022\03 (Mar)\ESI93132.raw

02/03/2022 5:32 pm

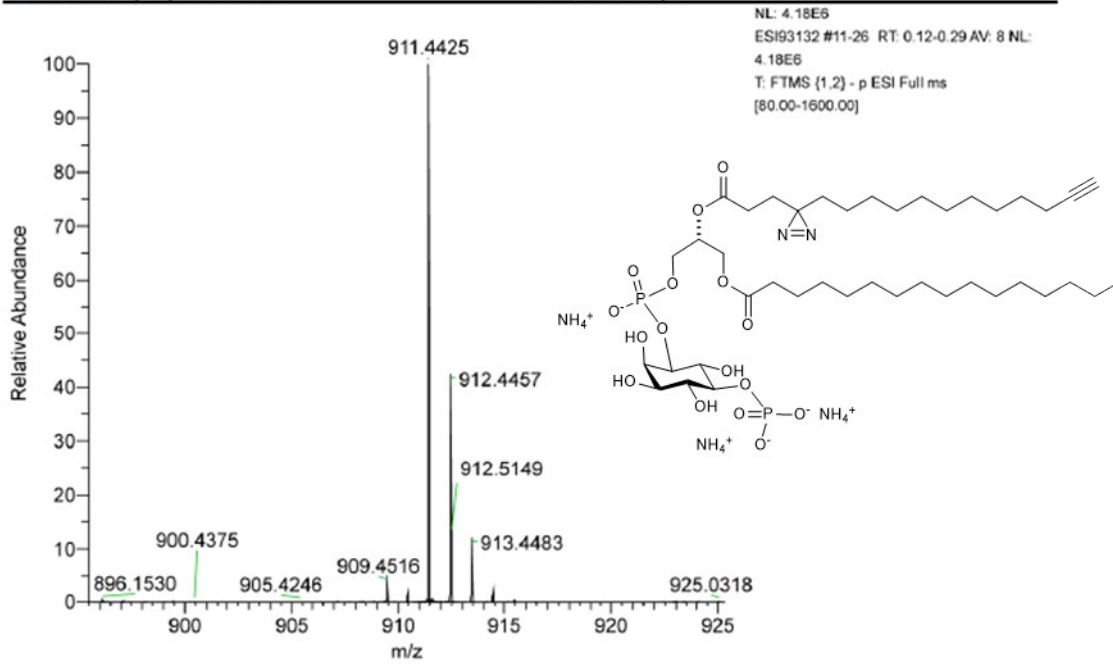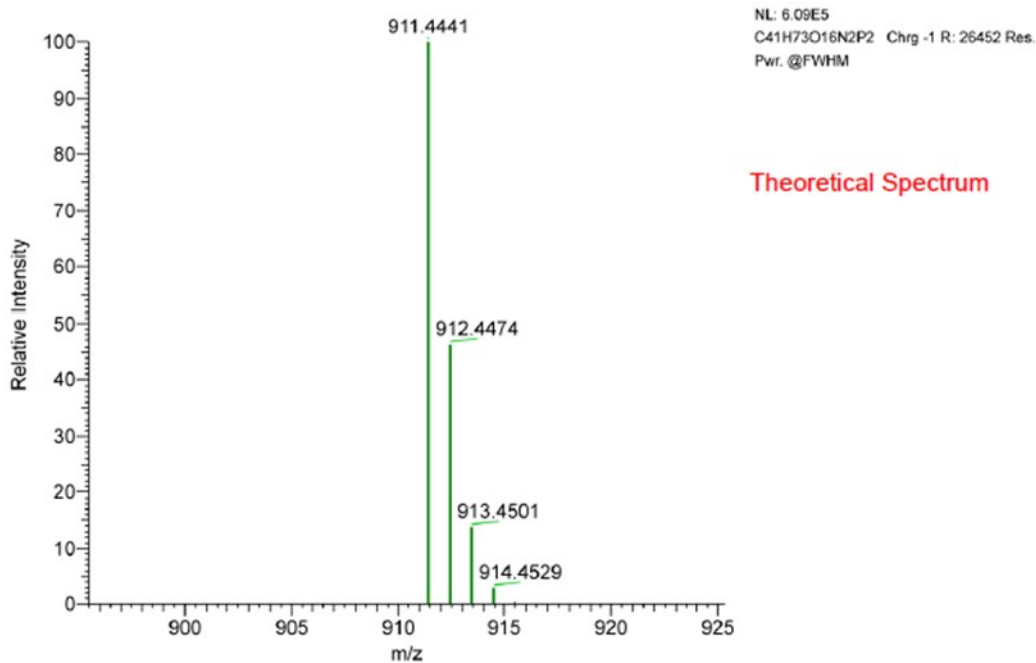

| Peak Mass Display... | Combin... | RDB    | Delta [p... | Theo. m... | Rank   | Combin... | # Match... | # Misse... | MS Cov... | Pattern... | MSMS... |          |
|----------------------|-----------|--------|-------------|------------|--------|-----------|------------|------------|-----------|------------|---------|----------|
| 911.4425             | C...H...  | 19.749 | 7.50        | -1.69      | 911.44 | 1         | 86.181     | 5          | 0         | 89.899     | 89.392  | ifCellar |

(+)-(2S)-3-[bis(4-methoxyphenyl)(phenyl)methoxy]-2-hydroxypropyl hexadecanoate (+)-S10 <sup>1</sup>H NMR

Current Data Parameters  
NAME Apr01-2021-42-GB-043  
EXPNO 1  
PROCNO 1

F2 - Acquisition Parameters  
Date 20210401  
Time 8.45 h  
INSTRUM avq400  
PROBHD Z108618\_0816 (  
PULPROG zg60  
TD 65536  
SOLVENT CDCl3  
NS 16  
DS 2  
SWH 8012.820 Hz  
FIDRES 0.244532 Hz  
AQ 4.0894465 sec  
RG 35.2  
DW 62.400 usec  
DE 6.50 usec  
TE 298.1 K  
D1 1.00000000 sec  
TDO 1  
SFO1 400.2024012 MHz  
NUC1 1H  
P1 14.00 usec  
PLW1 14.0000000 W

F2 - Processing parameters  
SI 32768  
SF 400.2000094 MHz  
WDW EM  
SSB 0  
LB 0.30 Hz  
GB 0  
PC 1.00

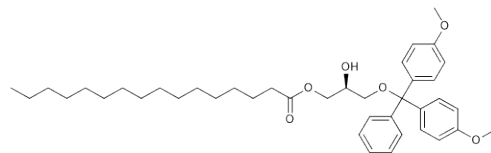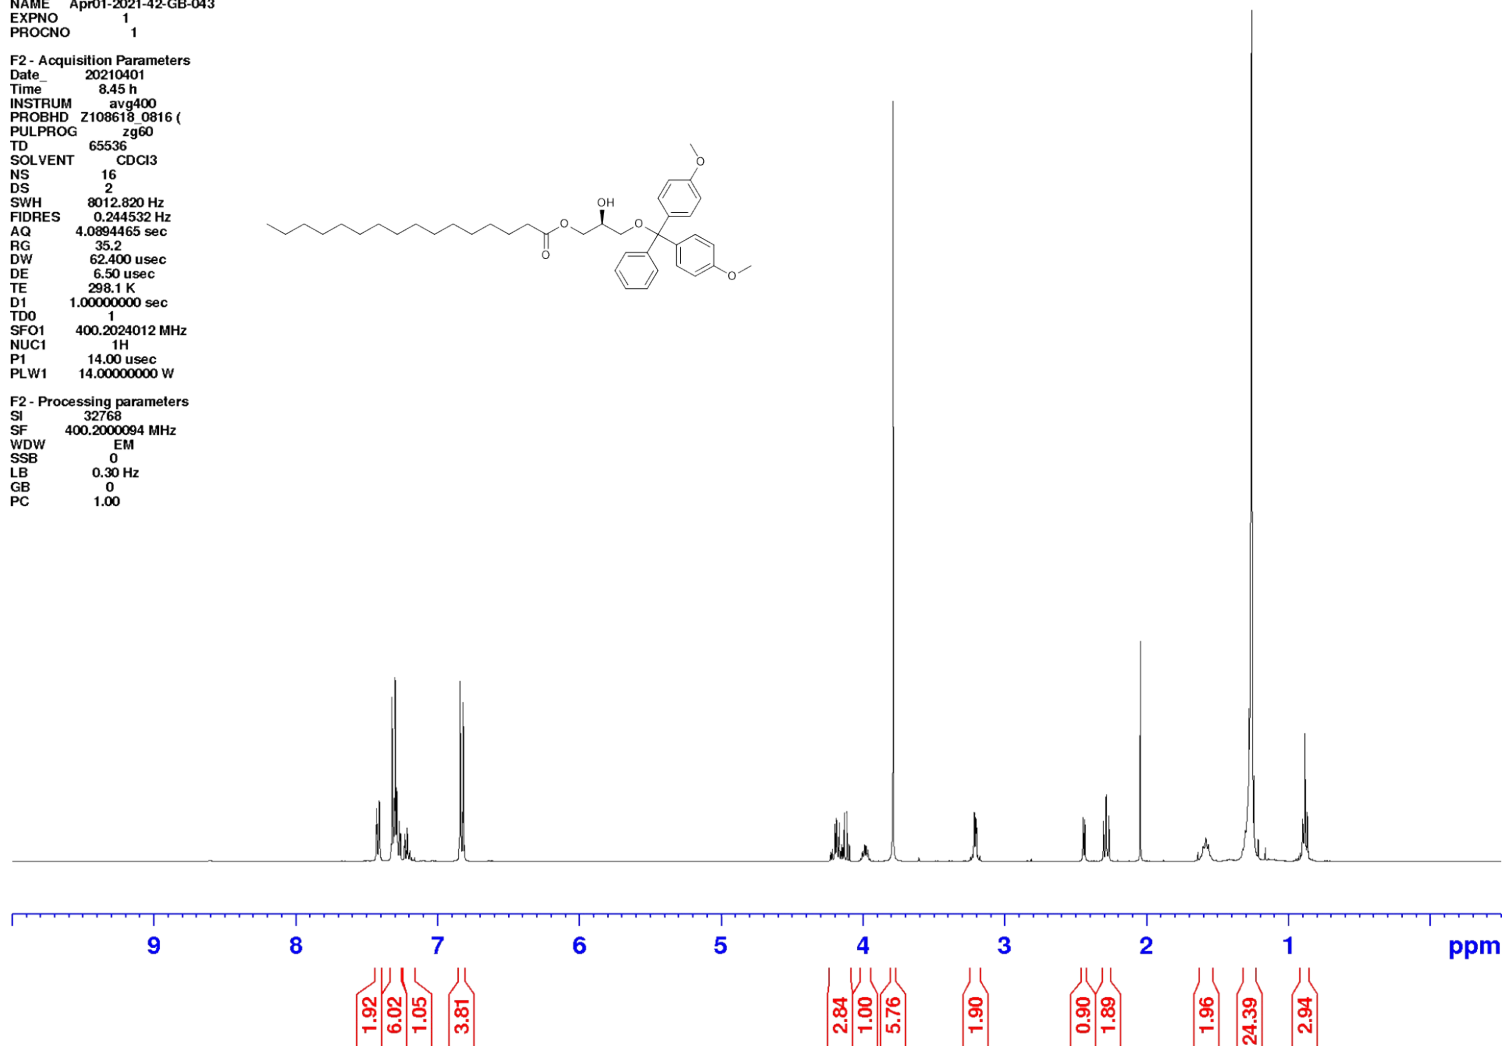



(+)-(2S)-3-[bis(4-methoxyphenyl)(phenyl)methoxy]-2-hydroxypropyl hexadecanoate (+)-S10  
HRMS

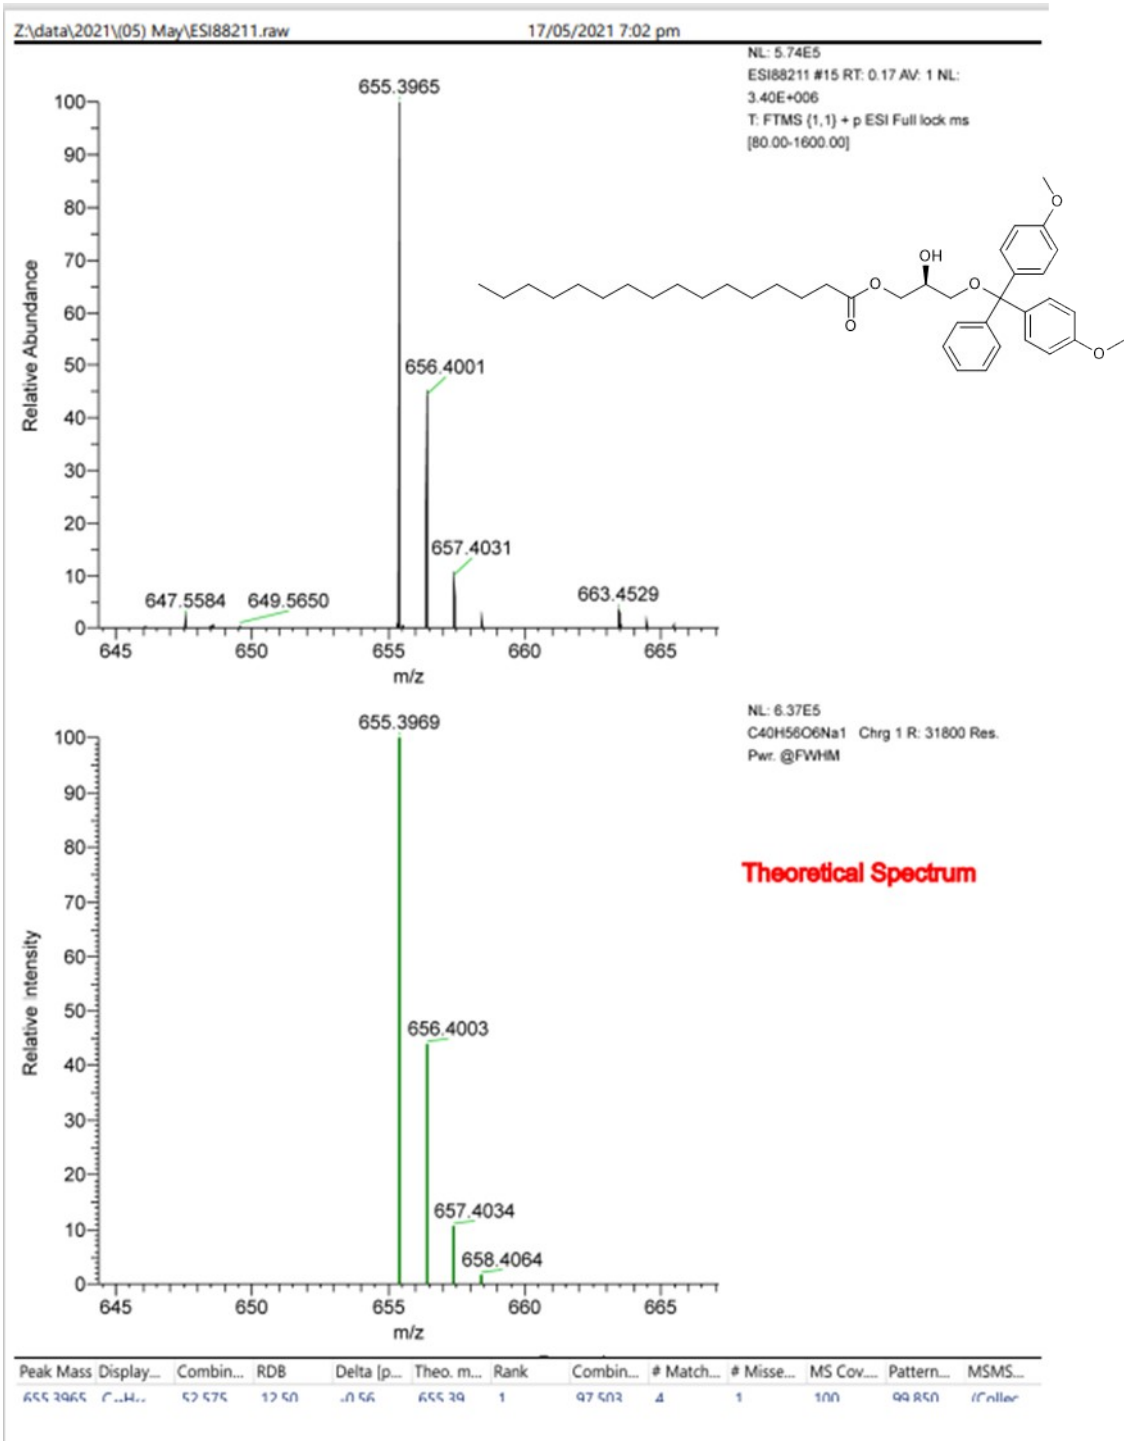

(+)-(2S)-3-[bis(4-methoxyphenyl)(phenyl)methoxy]-2-hydroxypropyl octanoate (+)-S11 <sup>1</sup>H NMR

Current Data Parameters  
NAME Apr05-2021-2-GB-044  
EXPNO 1  
PROCNO 1

F2 - Acquisition Parameters  
Date\_ 20210405  
Time 9.29 h  
INSTRUM avq400  
PROBHD Z108618.0816 ( )  
PULPROG zg60  
TD 65536  
SOLVENT CDCl3  
NS 16  
DS 2  
SWH 8012.820 Hz  
FIDRES 0.244532 Hz  
AQ 4.0894465 sec  
RG 91.39  
DW 62.400 usec  
DE 6.50 usec  
TE 297.7 K  
D1 1.0000000 sec  
TD0 1  
SFO1 400.2024012 MHz  
NUC1 1H  
P1 14.00 usec  
PLW1 14.0000000 W

F2 - Processing parameters  
SI 32768  
SF 400.2000094 MHz  
WDW EM  
SSB 0  
LB 0.30 Hz  
GB 0  
PC 1.00

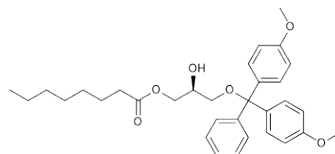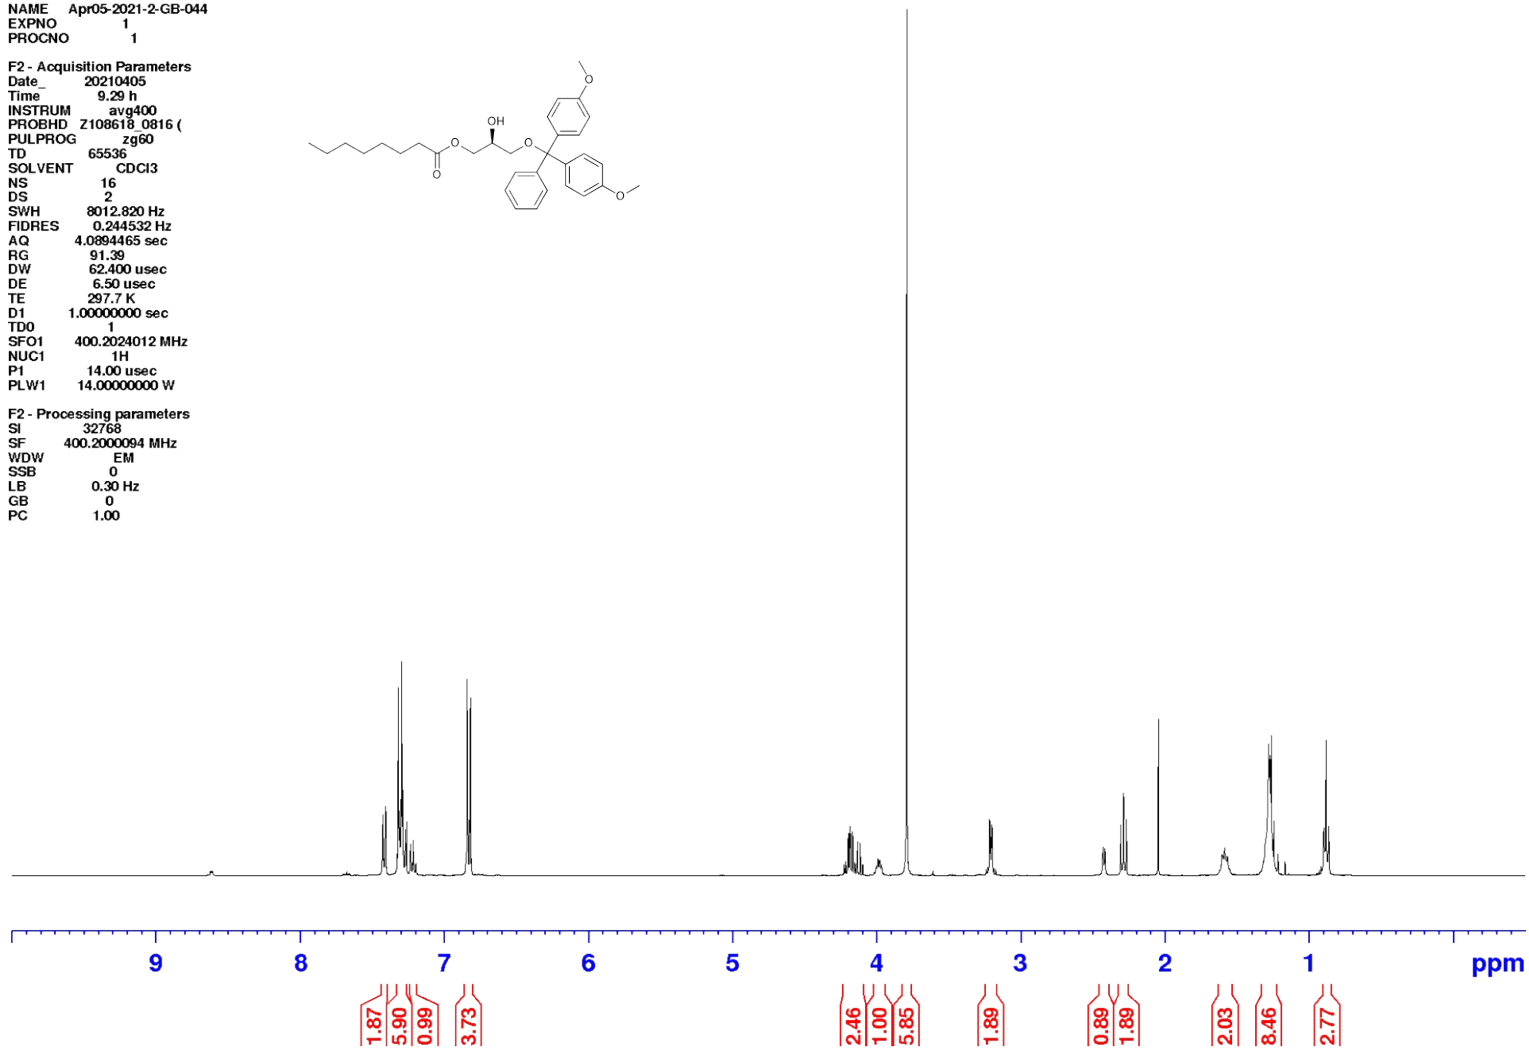

(+)-(2S)-3-[bis(4-methoxyphenyl)(phenyl)methoxy]-2-hydroxypropyl octanoate (+)-S11 <sup>13</sup>C NMR

Current Data Parameters  
NAME Apr05-2021-2-08-044  
EXPNO 2  
PROCNO 1

F2 - Acquisition Parameters  
Date\_ 20210405  
Time 10:11 h  
INSTRUM avq400  
PROBHD Z108618\_0816 (r  
PULPROG zgpg30  
TD 32768  
SOLVENT CDCl3  
NS 512  
DS 4  
SWH 26041.666 Hz  
FIDRES 1.589457 Hz  
AQ 0.6291456 sec  
RG 206.87  
DM 19.200 usec  
DE 6.20 usec  
TE 298.8 K  
D1 1.0000000 sec  
D11 0.0300000 sec  
TD0 1  
SFO1 100.6404331 MHz  
NUC1 13C  
FO 3.33 usec  
P1 10.00 usec  
PLM1 56.0000000 M  
SFO2 400.2016008 MHz  
NUC2 1H  
CPDPRG2 waltz16  
PCPD2 30.00 usec  
PLM2 14.0000000 M  
PLM12 0.33877000 M  
PLM13 0.17039999 M

F2 - Processing parameters  
SI 32768  
SF 100.6303577 MHz  
WDW EM  
SSB 0  
LB 1.00 Hz  
GB 0  
PC 1.40

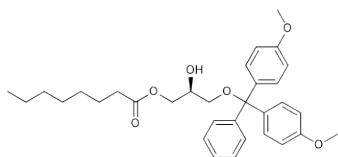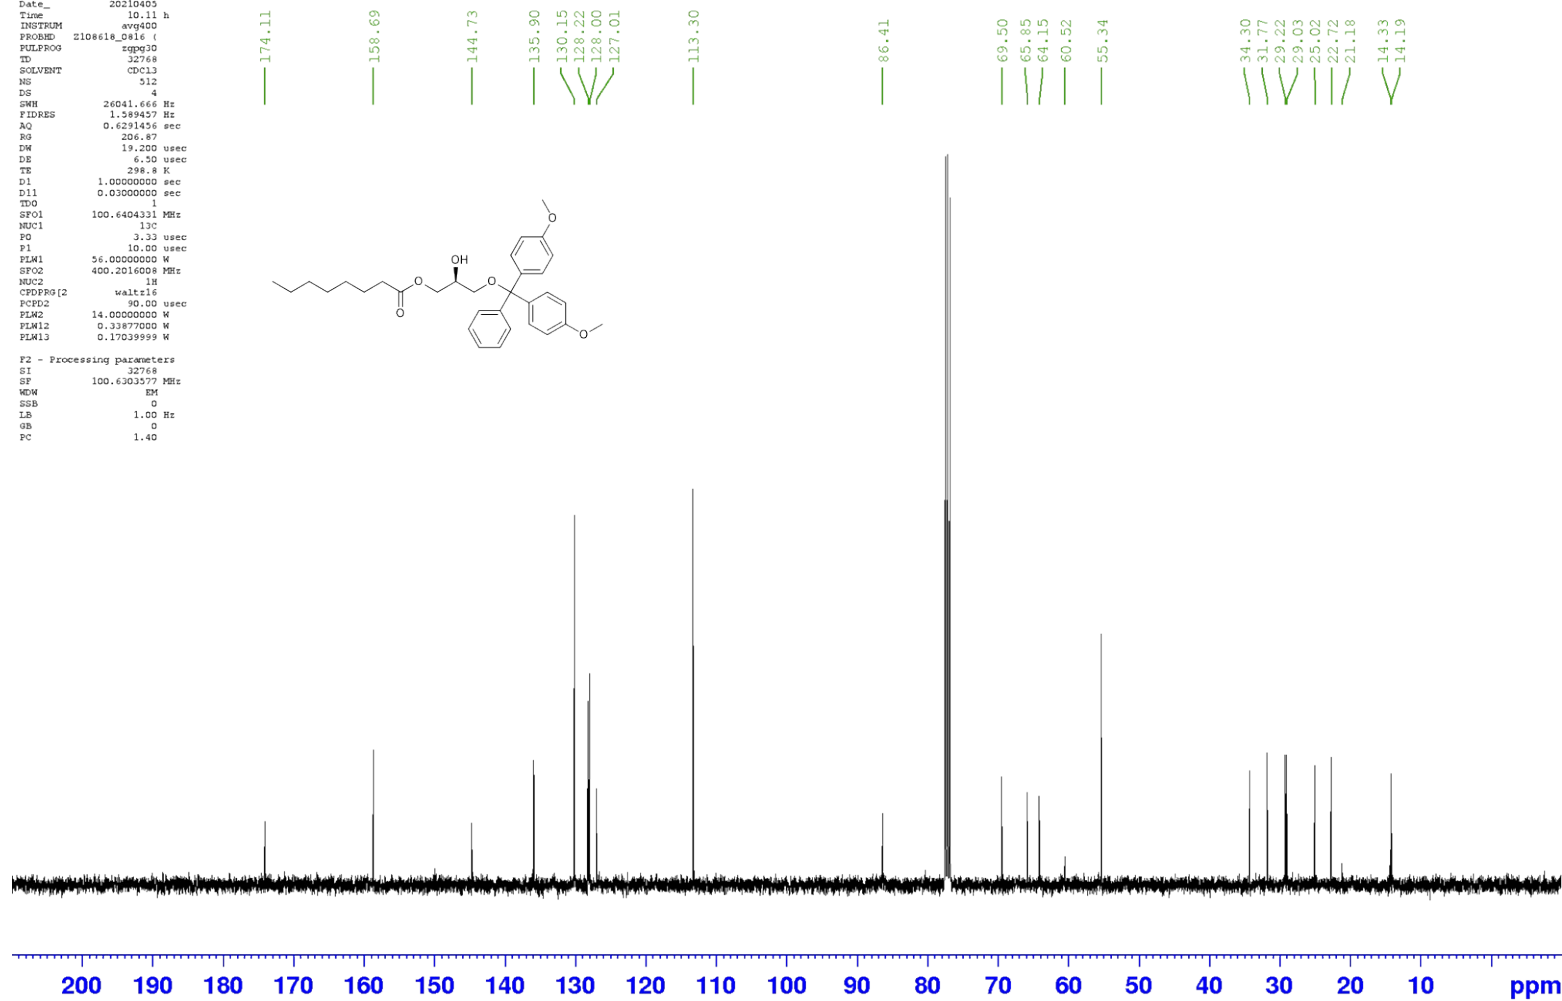

(+)-(2S)-3-[bis(4-methoxyphenyl)(phenyl)methoxy]-2-hydroxypropyl octanoate (+)-S11 HRMS

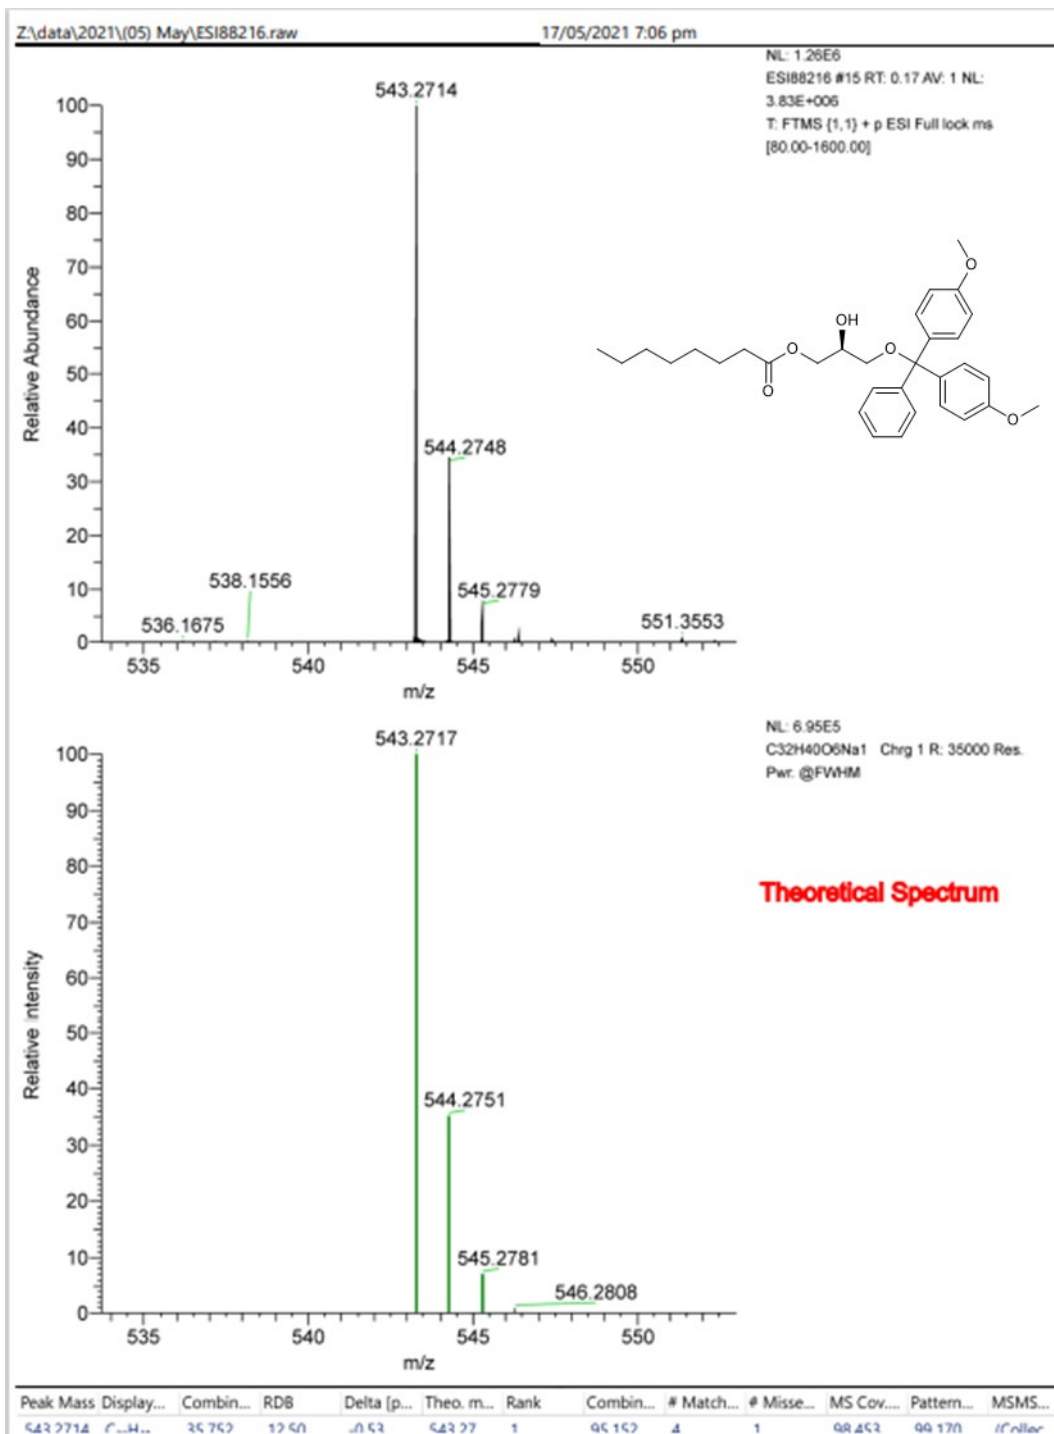

(+)-(2S)-3-[bis(4-methoxyphenyl)(phenyl)methoxy]-2-(octanoyloxy)propyl hexadecanoate (+)-S12 <sup>1</sup>H NMR

Current Data Parameters  
NAME Apr05-2021-3-GB-045  
EXPNO 1  
PROCNO 1

F2 - Acquisition Parameters  
Date 20210405  
Time 9.34 h  
INSTRUM avq400  
PROBHD Z108618\_0816 ( )  
PULPROG zg60  
TD 65536  
SOLVENT CDCl3  
NS 16  
DS 2  
SWH 8012.820 Hz  
FIDRES 0.244532 Hz  
AQ 4.0894465 sec  
RG 39.24  
DW 62.400 usec  
DE 6.50 usec  
TE 297.7 K  
D1 1.00000000 sec  
TDO 1  
SFO1 400.2024012 MHz  
NUC1 1H  
P1 14.00 usec  
PLW1 14.00000000 W

F2 - Processing parameters  
SI 32768  
SF 400.2000099 MHz  
WDW EM  
SSB 0  
LB 0.30 Hz  
GB 0  
PC 1.00

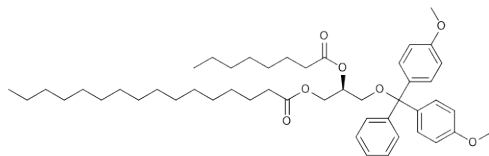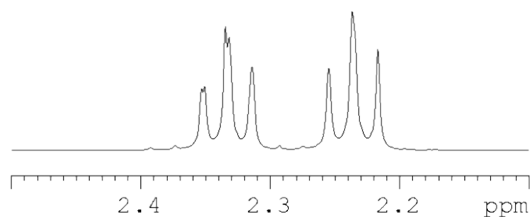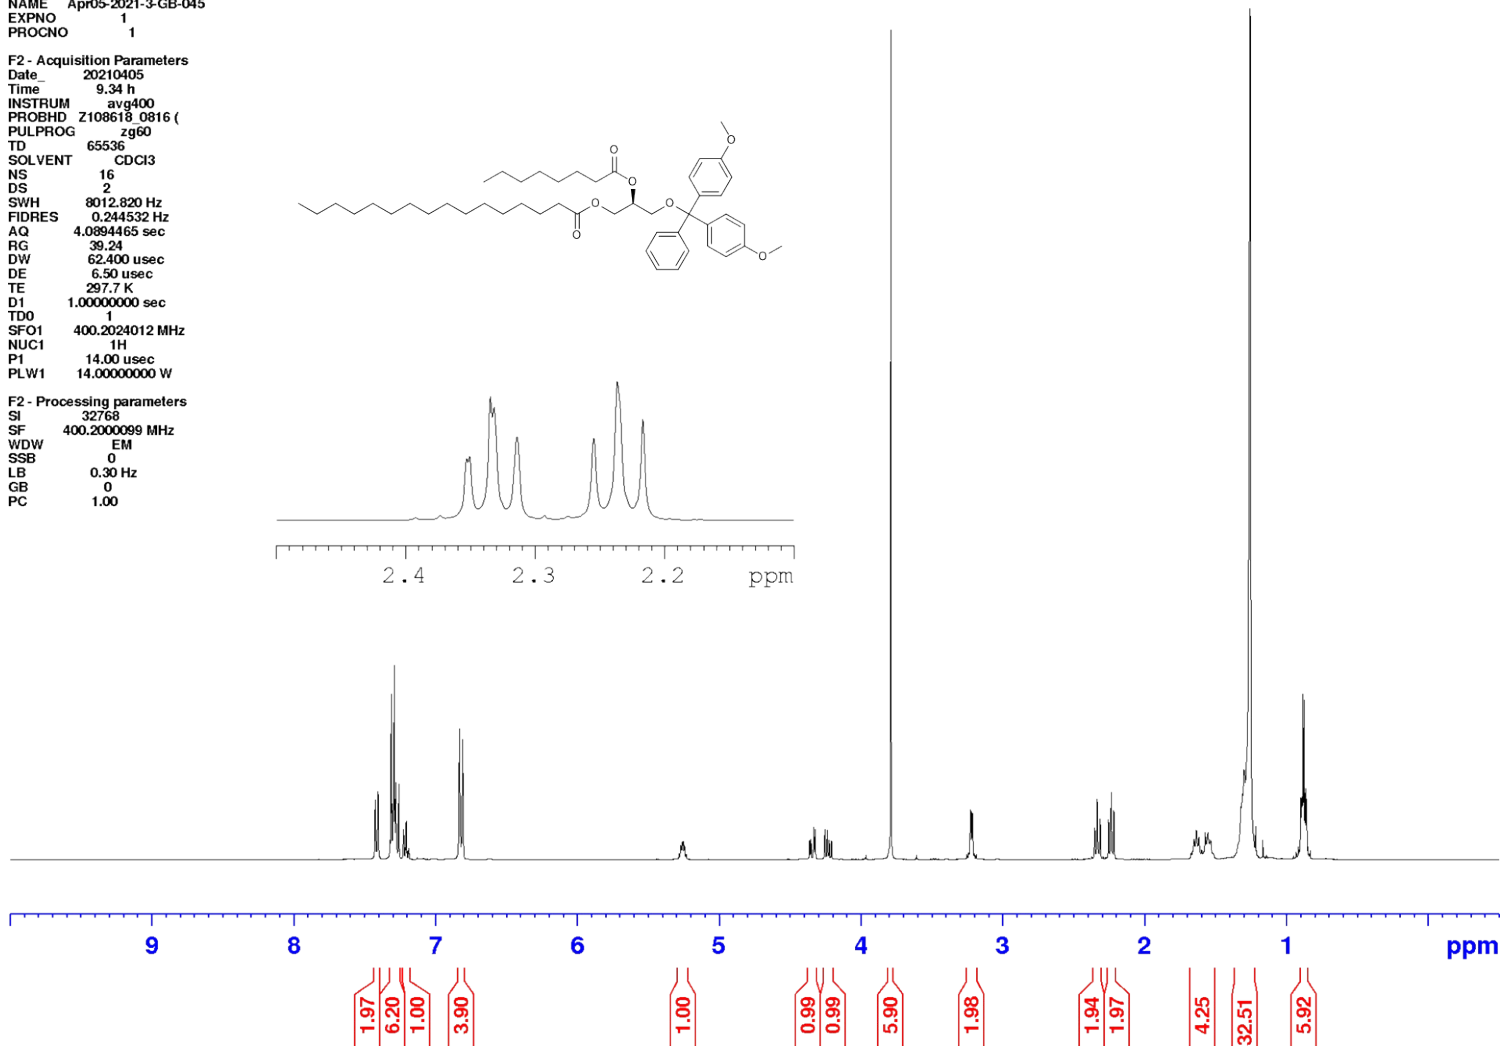

(+)-(2S)-3-[bis(4-methoxyphenyl)(phenyl)methoxy]-2-(octanoyloxy)propyl hexadecanoate (+)-S12 <sup>13</sup>C NMR

Current Data Parameters  
NAME Apr05-2021-3-08-045  
EXPNO 2  
PROCNO 1

F2 - Acquisition Parameters  
Date\_ 20210405  
Time 10.29 h  
INSTRUM avq400  
PROBHD Z108618\_0816 ( )  
PULPROG zgpg30  
TD 22768  
SOLVENT CDCl3  
NS 512  
DS 4  
SMH 26041.666 Hz  
FIDRES 1.589457 Hz  
AQ 0.6291436 sec  
RG 206.87  
DM 19.200 usec  
DE 6.50 usec  
TE 298.8 K  
D1 1.0000000 sec  
D11 0.0300000 sec  
TDO 1  
SFO1 100.6404331 MHz  
NUC1 13C  
PO 3.33 usec  
P1 10.00 usec  
PLM1 56.0000000 W  
SFO2 400.2016008 MHz  
NUC2 1H  
CPDPRG2 waltz16  
PCPD2 90.00 usec  
PLM2 14.0000000 W  
PLM12 0.33877000 W  
PLM13 0.17039999 W

F2 - Processing parameters  
SI 32768  
SF 100.6303989 MHz  
WDW EM  
SSB 0  
LB 1.00 Hz  
GB 0  
PC 1.40

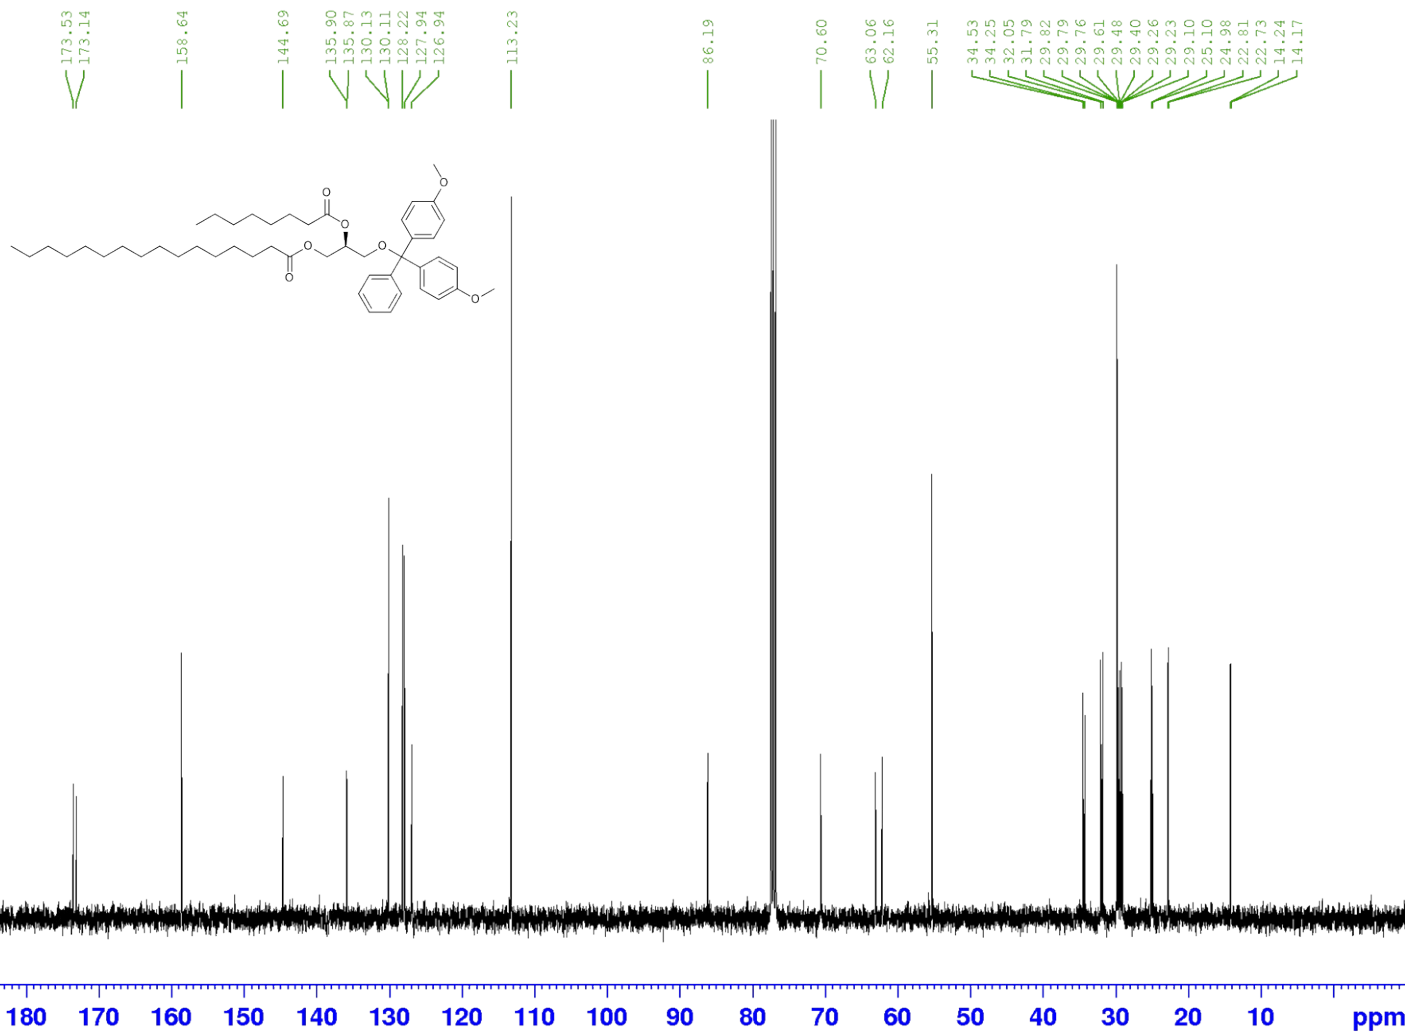

(+)-(2S)-3-[bis(4-methoxyphenyl)(phenyl)methoxy]-2-(octanoyloxy)propyl hexadecanoate (+)-S12 HRMS

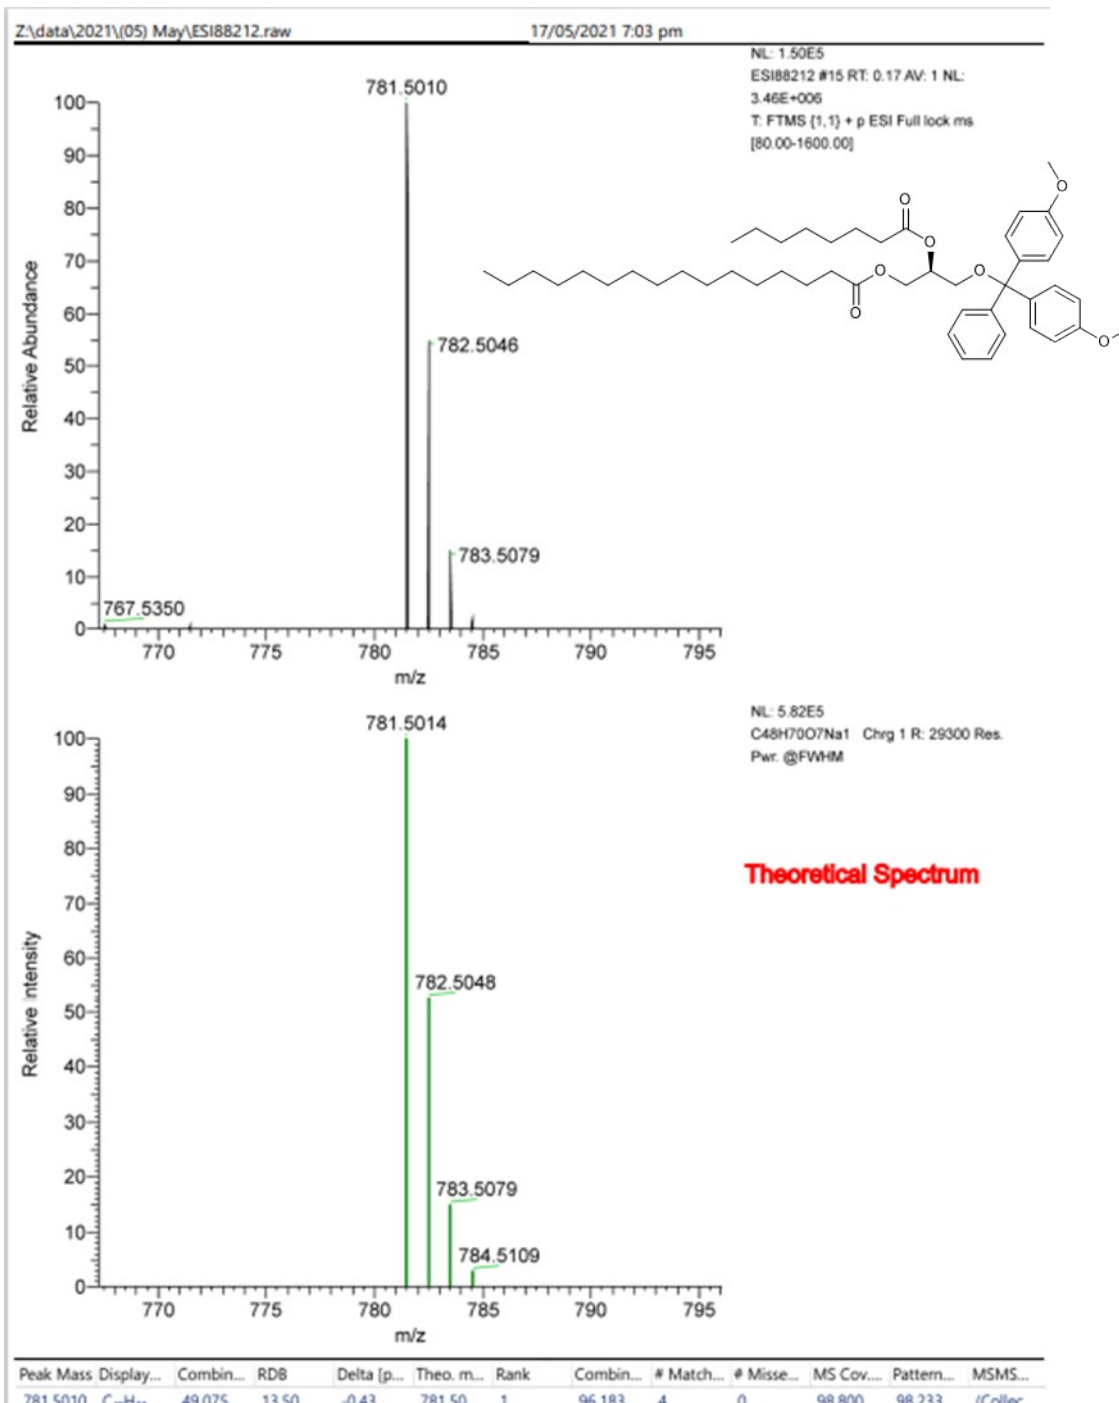

(+)-(2S)-1-[bis(4-methoxyphenyl)(phenyl)methoxy]-3-(octanoyloxy)propan-2-yl hexadecanoate (+)-S13 <sup>1</sup>H NMR

Current Data Parameters  
NAME Apr07-2021-20-GB-046  
EXPNO 1  
PROCNO 1

F2 - Acquisition Parameters  
Date 20210407  
Time 10.13 h  
INSTRUM avq400  
PROBHD Z108618\_0816 ( )  
PULPROG zg60  
TD 65536  
SOLVENT CDCl3  
NS 16  
DS 2  
SWH 8012.820 Hz  
FIDRES 0.244532 Hz  
AQ 4.0894465 sec  
RG 22.48  
DW 62.400 usec  
DE 6.50 usec  
TE 296.3 K  
D1 1.00000000 sec  
TDO 1  
SFO1 400.2024012 MHz  
NUC1 1H  
P1 14.00 usec  
PLW1 14.0000000 W

F2 - Processing parameters  
SI 32768  
SF 400.2000095 MHz  
WDW EM  
SSB 0  
LB 0.30 Hz  
GB 0  
PC 1.00

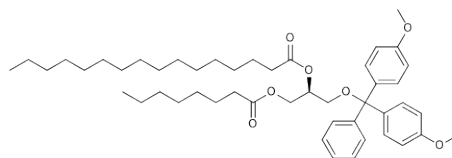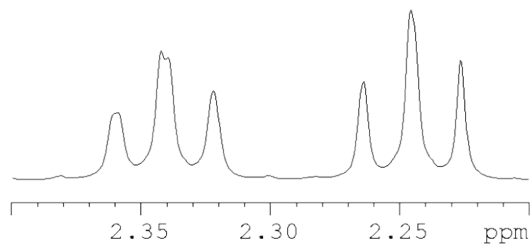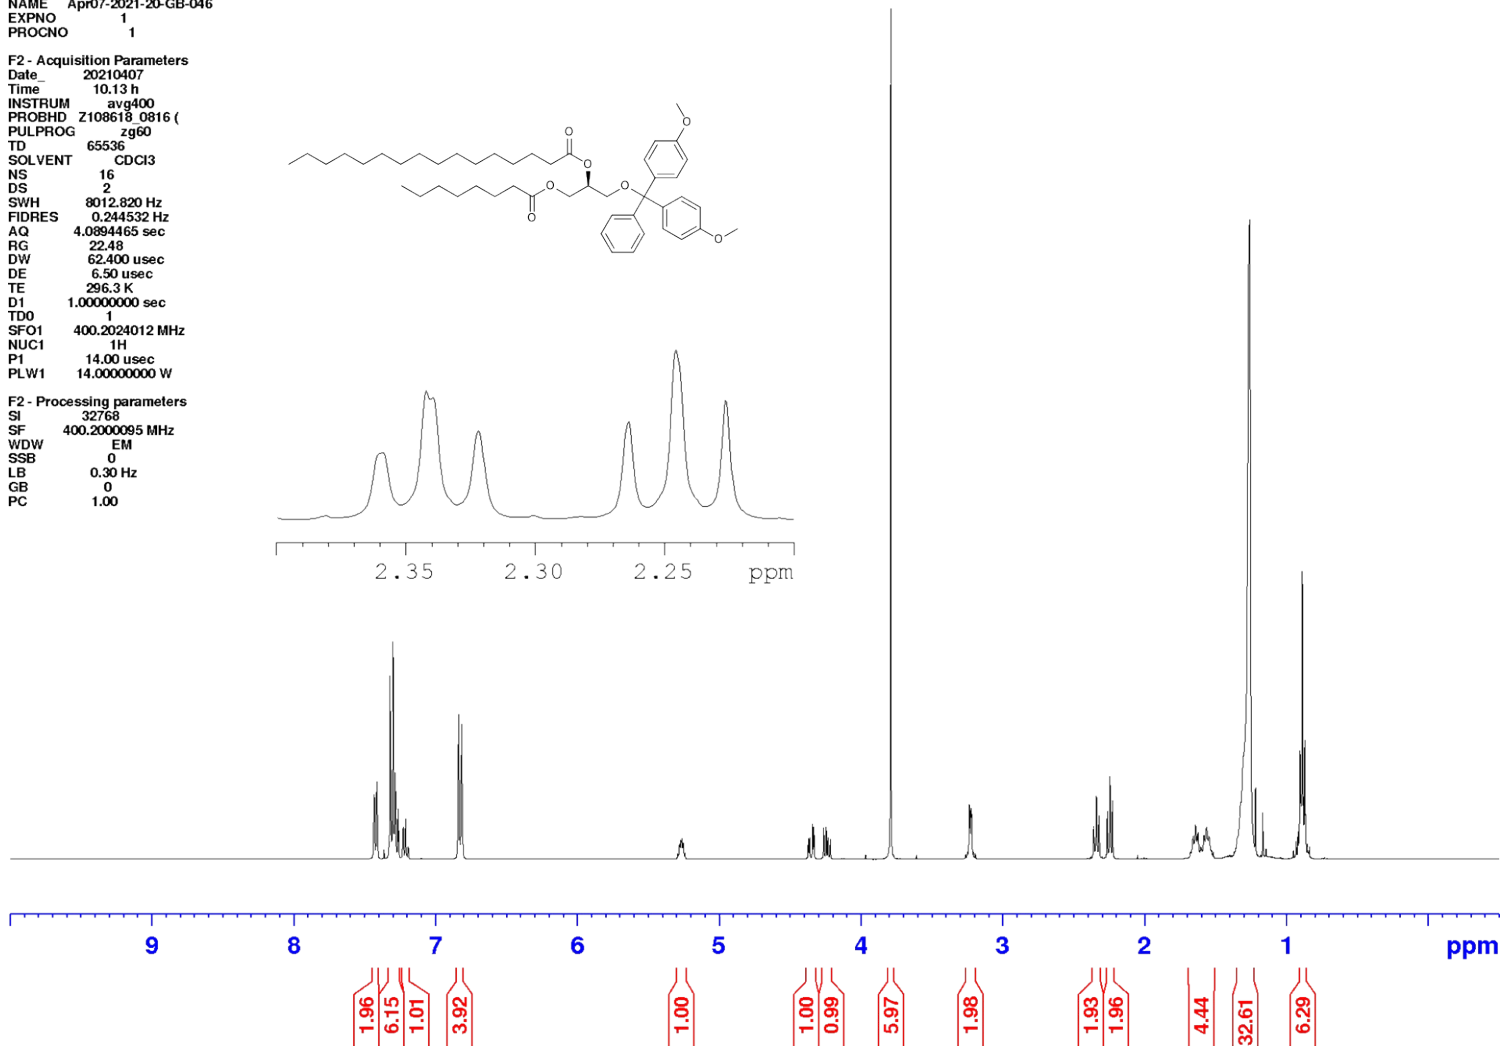

(+)-(2S)-1-[bis(4-methoxyphenyl)(phenyl)methoxy]-3-(octanoyloxy)propan-2-yl hexadecanoate (+)-S13 <sup>13</sup>C NMR

Current Data Parameters  
 NAME Apr07-2021-20-08-046  
 EXPNO 2  
 PROCNO 1

F2 - Acquisition Parameters  
 Date\_ 20210407  
 Time 11:05 h  
 INSTRUM avq400  
 PROBEID Z108618\_0816 ( )  
 PULPROG zgpg30  
 TD 32768  
 SOLVENT CDCl3  
 NS 512  
 DS 4  
 SMH 26041.666 Hz  
 FIDRES 1.589457 Hz  
 AQ 0.6291436 sec  
 RG 206.87  
 DM 19.200 usec  
 DE 6.50 usec  
 TE 297.4 K  
 D1 1.0000000 sec  
 D11 0.0300000 sec  
 TDO 1  
 SFO1 100.6404331 MHz  
 NUC1 13C  
 PO 3.33 usec  
 P1 10.00 usec  
 PLM1 36.0000000 W  
 SFO2 400.2016008 MHz  
 NUC2 1H  
 CPDPRG2 waltz16  
 FPCP2 90.00 usec  
 PLM2 14.0000000 W  
 PLM12 0.33877000 W  
 PLM13 0.17039999 W

173.52  
 173.15  
 158.64  
 144.69  
 135.89  
 135.86  
 130.13  
 130.11  
 128.21  
 127.94  
 126.94  
 113.23  
 86.18  
 70.60  
 63.06  
 62.16  
 55.29  
 34.54  
 34.24  
 32.05  
 31.79  
 29.82  
 29.78  
 29.62  
 29.49  
 29.46  
 29.29  
 29.19  
 29.04  
 25.10  
 24.98  
 22.81  
 22.73  
 14.24  
 14.19

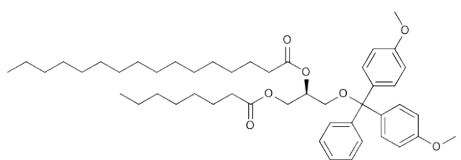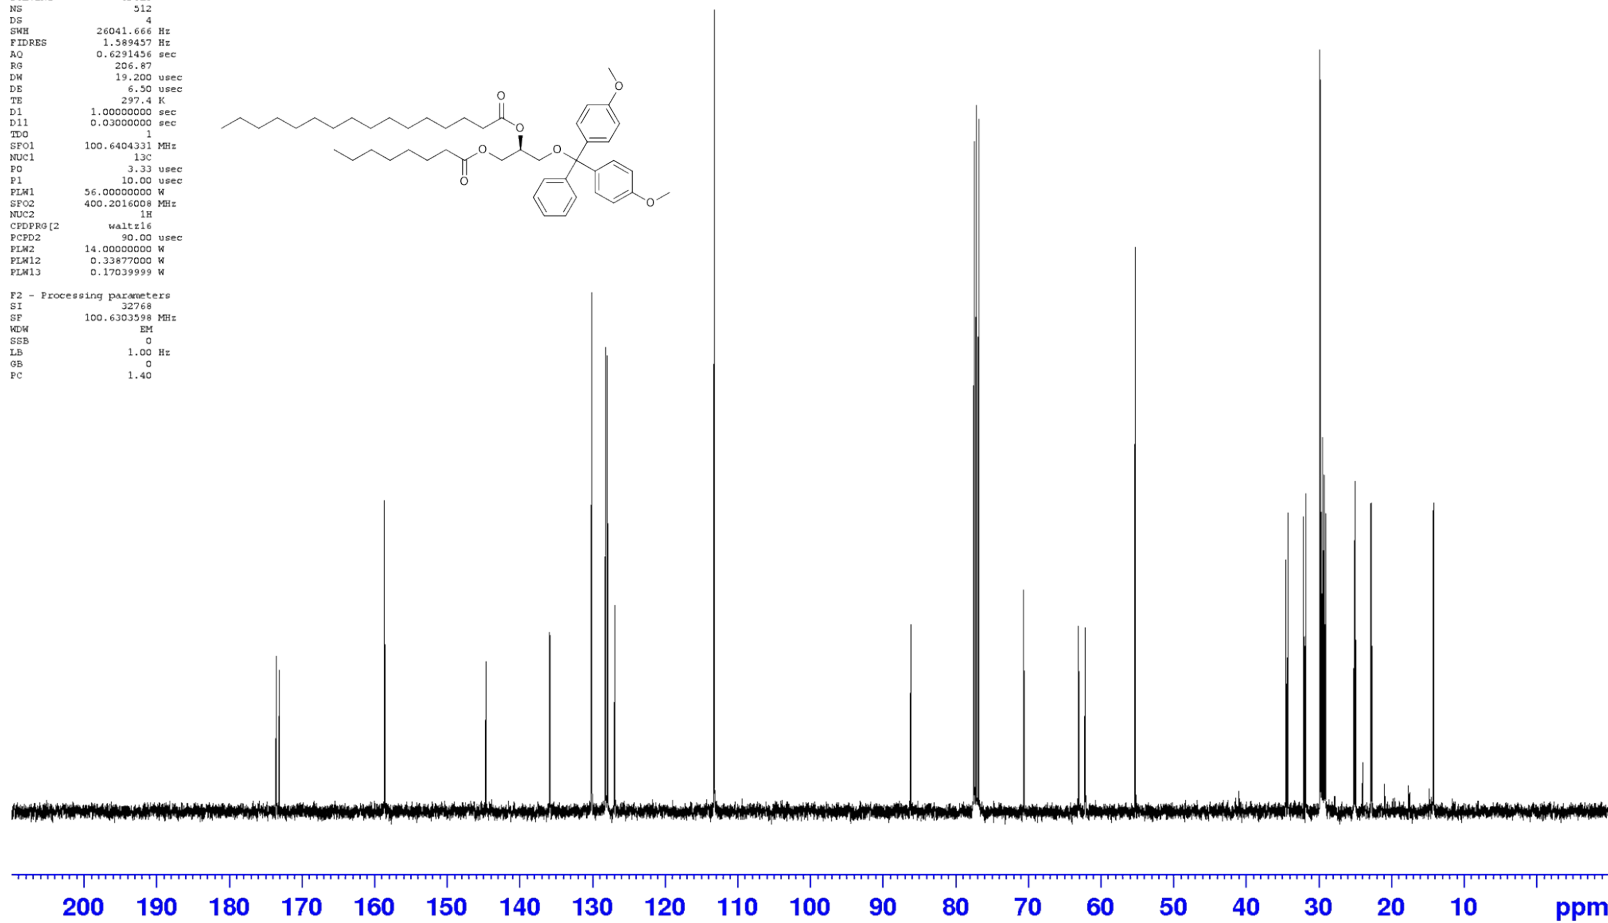

(+)-(2S)-1-[bis(4-methoxyphenyl)(phenyl)methoxy]-3-(octanoyloxy)propan-2-yl hexadecanoate  
(+)-S13 HMRS

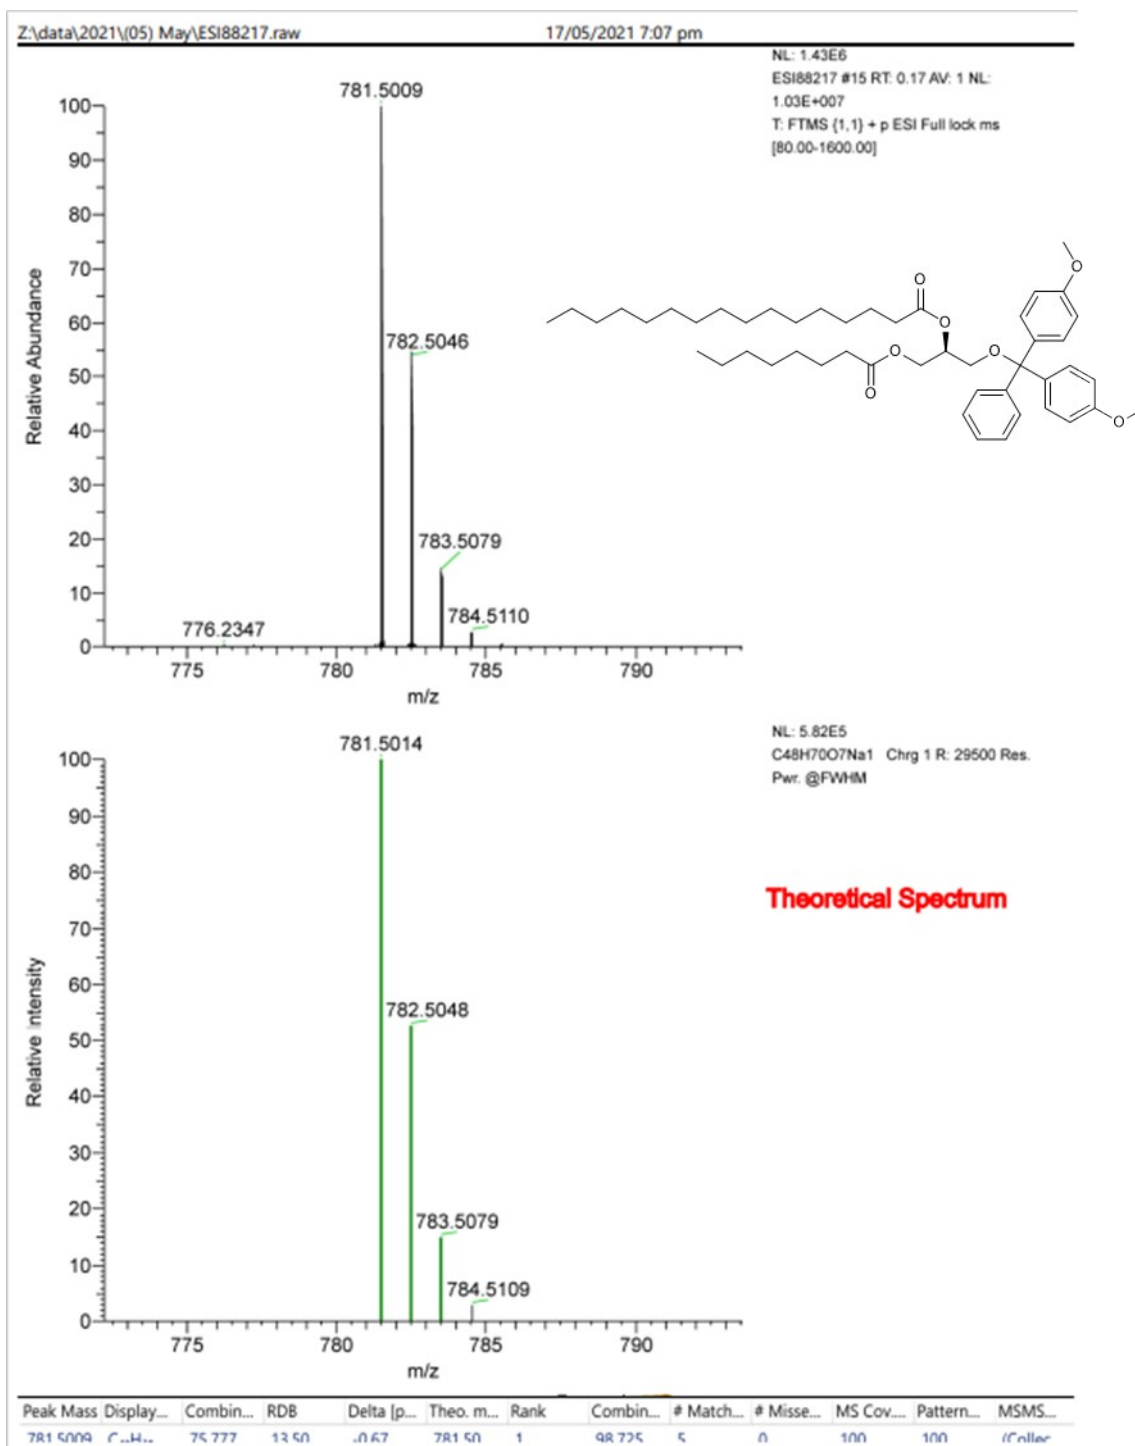

**(-)-(2S)-3-hydroxy-2-(octanoyloxy)propyl hexadecanoate (-)-S14 <sup>1</sup>H NMR**

Current Data Parameters  
NAME gb710731807 (C16, C8 -OH)  
EXPNO 1  
PROCNO 1

F2 - Acquisition Parameters  
Date 20230718  
Time 20.43 h  
INSTRUM Avance  
PROBHD Z159656\_0020 (zg30)  
PULPROG zg30  
TD 65536  
SOLVENT CDCl3  
NS 16  
DS 2  
SWH 11904.762 Hz  
FIDRES 0.363304 Hz  
AQ 2.7525120 sec  
RG 64  
DW 42.000 usec  
DE 22.00 usec  
TE 298.0 K  
D1 1.00000000 sec  
TDO 1  
SFO1 600.4230021 MHz  
NUC1 1H  
P0 4.00 usec  
P1 12.00 usec  
PLW1 13.51200008 W

F2 - Processing parameters  
SI 65536  
SF 600.4200137 MHz  
WDW EM  
SSB 0  
LB 0.30 Hz  
GB 0  
PC 1.00

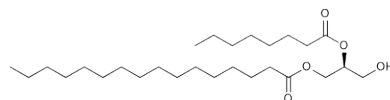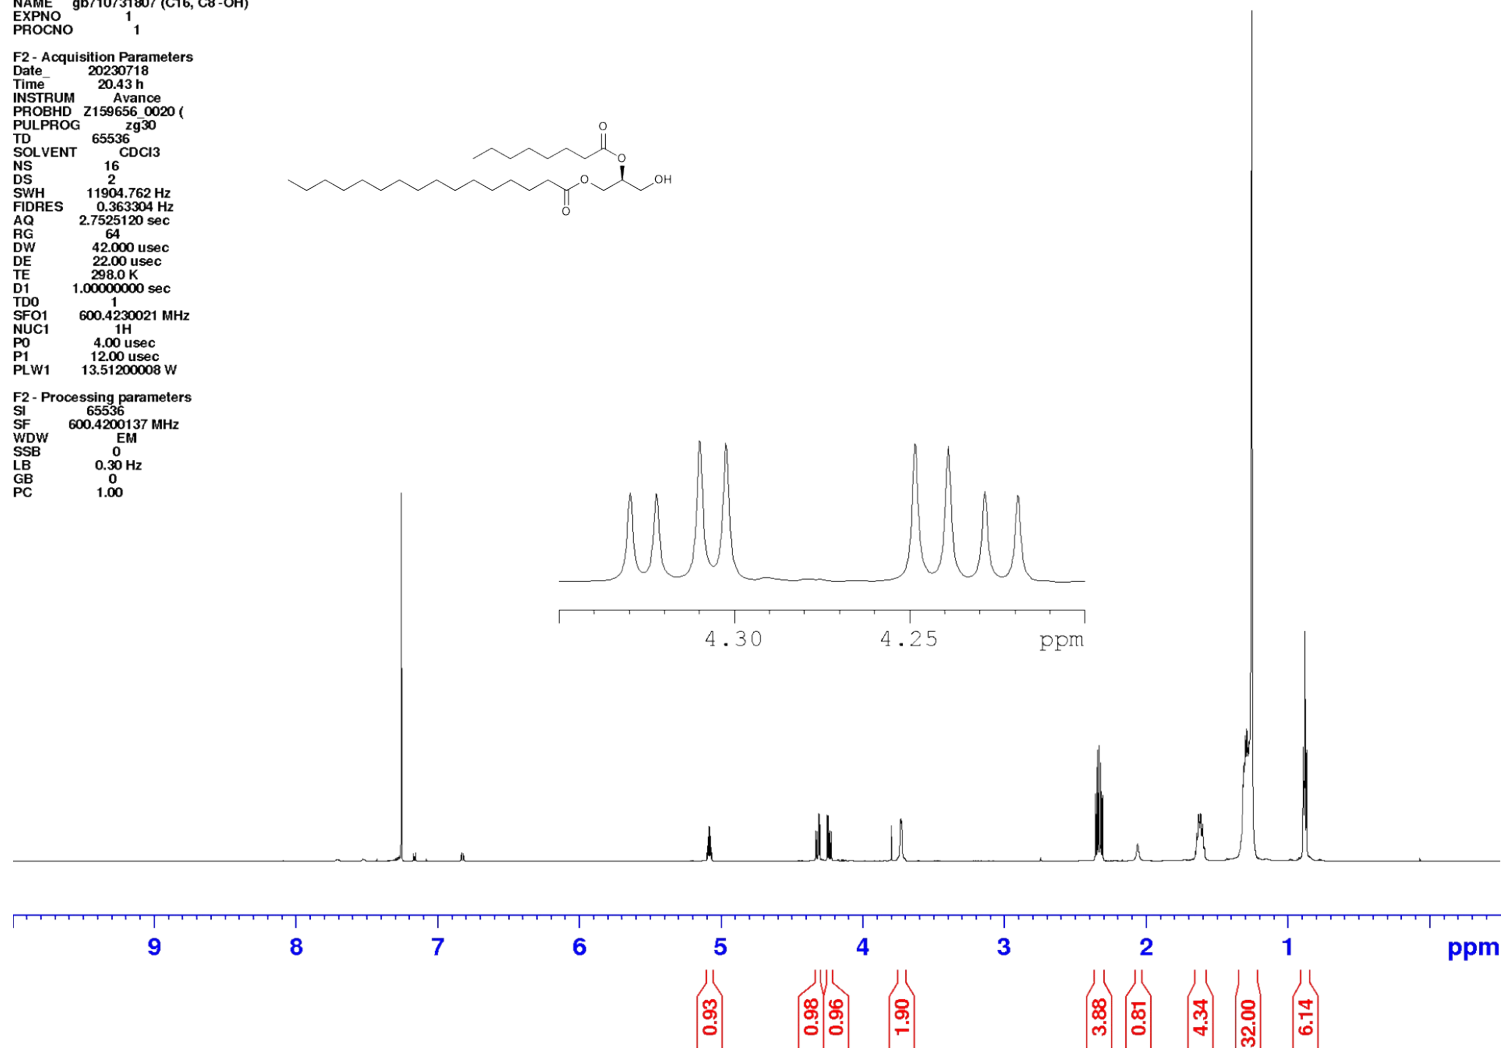

**(-)-(2S)-3-hydroxy-2-(octanoyloxy)propyl hexadecanoate (-)-S14 <sup>13</sup>C NMR**

Current Data Parameters  
 NAME qb710731807 (C16, C8 -OH)  
 EXPNO 5  
 PROCNO 1

F2 - Acquisition Parameters  
 Date\_ 20230719  
 Time 0.08 h  
 INSTRUM Avance  
 PROBHD Z199656\_0020 (1  
 PULPROG zgpg30  
 TD 65536  
 SOLVENT CDCl3  
 NS 2048  
 DS 4  
 SWH 35714.283 Hz  
 FIDRES 1.089913 Hz  
 AQ 0.9175040 sec  
 RG 101  
 DM 14.000 usec  
 DE 18.00 usec  
 TE 298.0 K  
 D1 3.0000000 sec  
 D11 0.0300000 sec  
 ED0 1  
 SFO1 150.9923364 MHz  
 NUC1 13C  
 PO 3.33 usec  
 P1 10.00 usec  
 PLM1 41.91400146 M  
 SFO2 600.4224017 MHz  
 NUC2 1H  
 CPDPRG2 waltz16  
 PCPD2 70.00 usec  
 PLM2 13.51200008 M  
 PLM12 0.39708999 M  
 PLM13 0.19972999 M

F2 - Processing parameters  
 SI 65536  
 SF 150.9757081 MHz  
 WDW EM  
 SSB 0  
 LB 1.00 Hz  
 GB 0  
 PC 1.40

173.93  
173.57

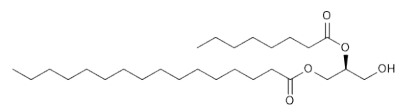

72.27  
62.15  
61.72

34.43  
34.26  
32.07  
31.79  
29.83  
29.82  
29.79  
29.75  
29.61  
29.50  
29.41  
29.27  
29.18  
29.06  
25.08  
25.04  
22.83  
22.74  
14.25  
14.19

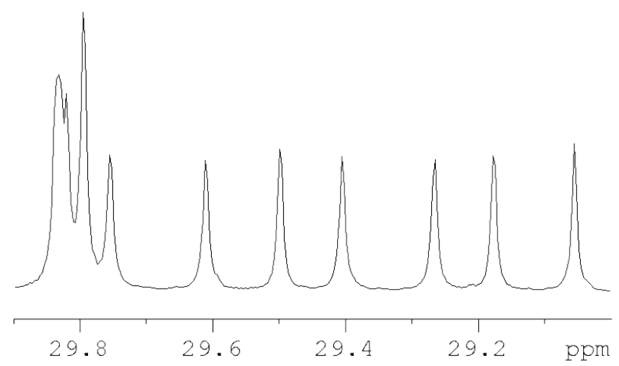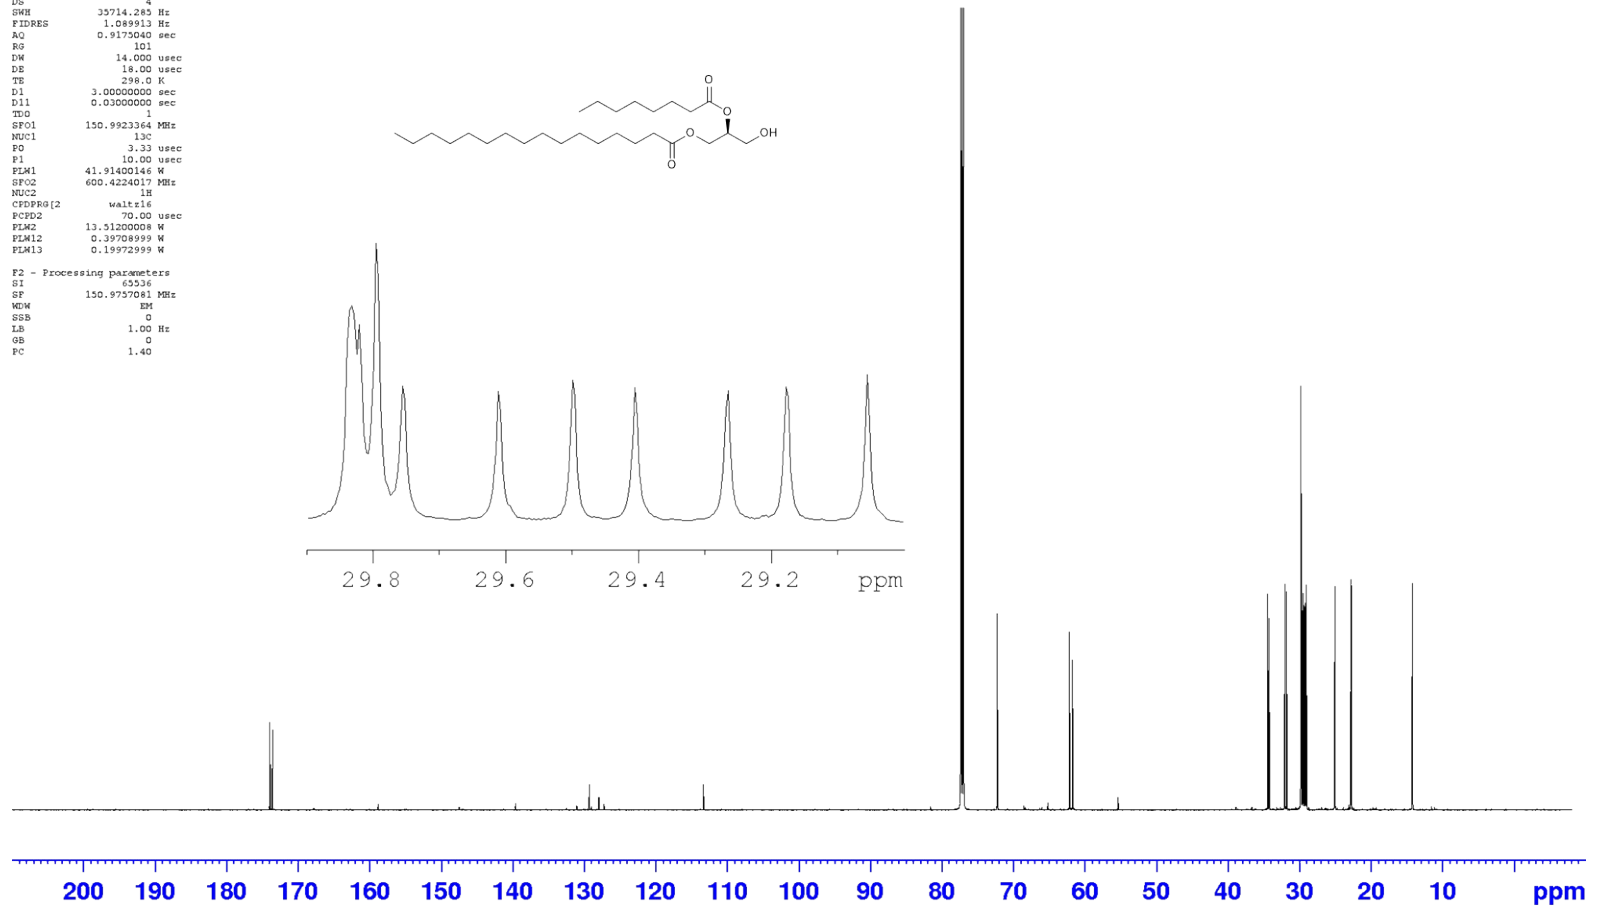

**(-)-(2S)-3-hydroxy-2-(octanoyloxy)propyl hexadecanoate (-)-S14 HRMS**

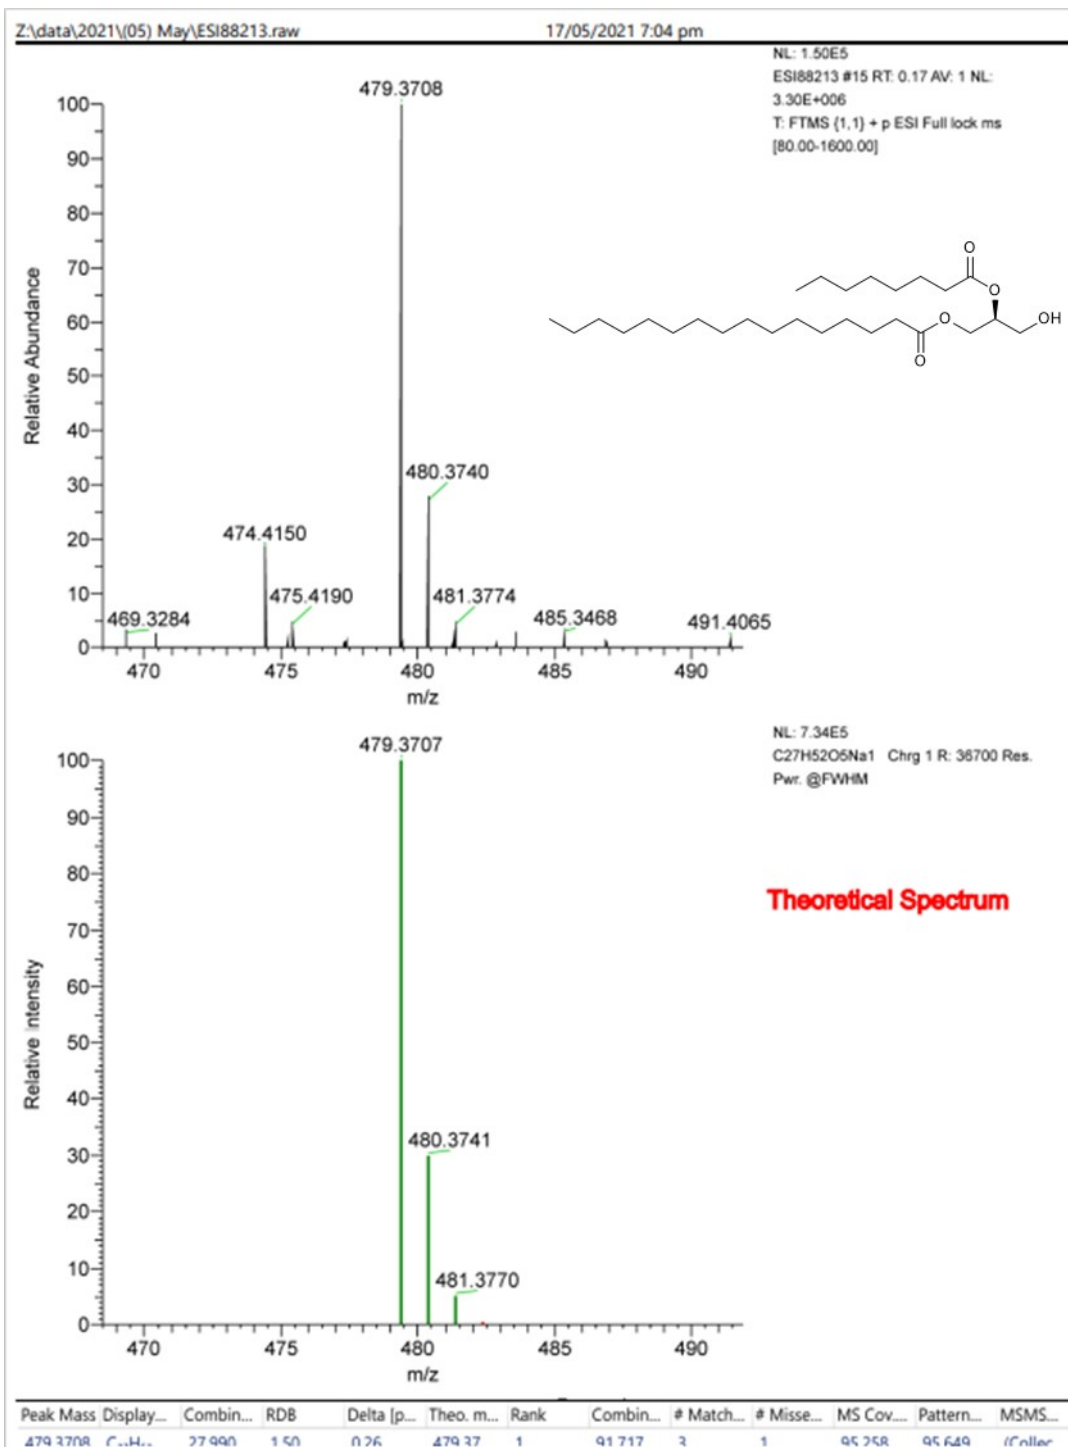

(2S)-1-hydroxy-3-(octanoyloxy)propan-2-yl hexadecanoate (-)-S15 <sup>1</sup>H NMR

Current Data Parameters  
NAME Apr08-2021-6-GB-050  
EXPNO 1  
PROCNO 1

F2 - Acquisition Parameters  
Date 20210408  
Time 9.49 h  
INSTRUM avq400  
PROBHD Z108618\_0816 ( )  
PULPROG zg60  
TD 65536  
SOLVENT CDCl3  
NS 16  
DS 2  
SWH 8012.820 Hz  
FIDRES 0.244532 Hz  
AQ 4.0894465 sec  
RG 91.39  
DW 62.400 usec  
DE 6.50 usec  
TE 297.3 K  
D1 1.00000000 sec  
TDO 1  
SFO1 400.2024012 MHz  
NUC1 1H  
P1 14.00 usec  
PLW1 14.00000000 W

F2 - Processing parameters  
SI 32768  
SF 400.2000098 MHz  
WDW EM  
SSB 0  
LB 0.30 Hz  
GB 0  
PC 1.00

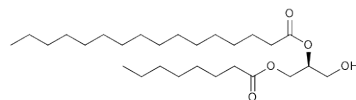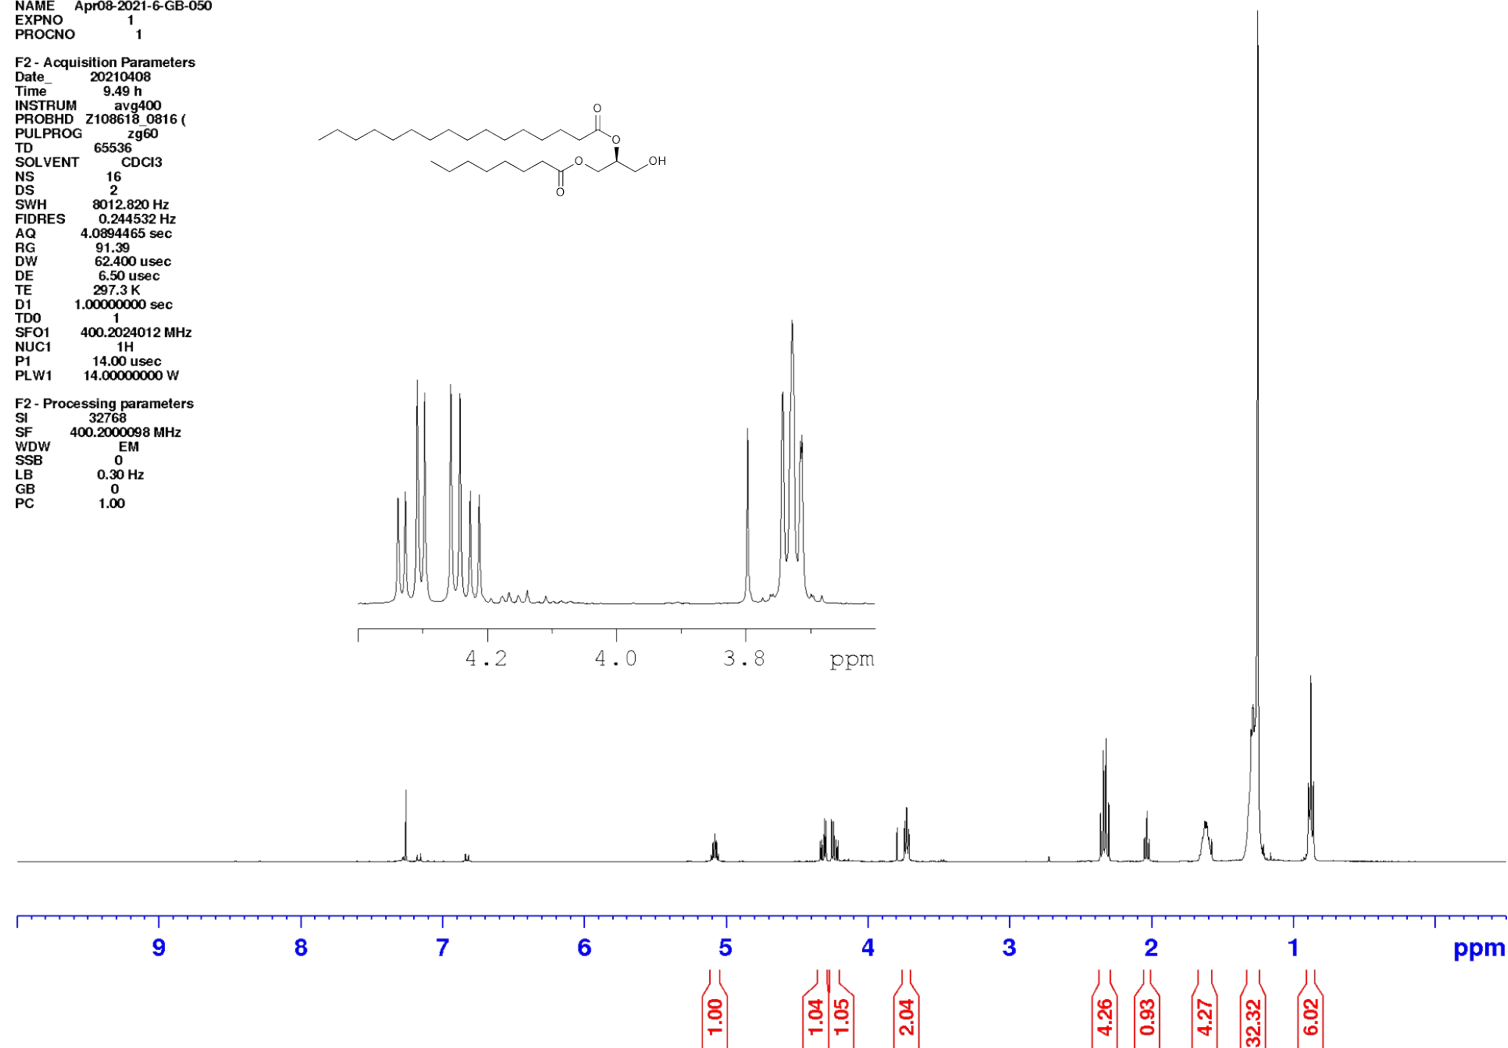

(2S)-1-hydroxy-3-(octanoyloxy)propan-2-yl hexadecanoate (-)-S15 <sup>13</sup>C NMR

Current Data Parameters  
NAME Apr08-2021-6-08-050  
EXPNO 2  
PROCNO 1

F2 - Acquisition Parameters  
Date\_ 20210408  
Time 21.52 h  
INSTRUM avq400  
PROBHD Z108618\_0816 ( )  
PULPROG zgpg30  
TD 32768  
SOLVENT CDCl3  
NS 512  
DS 4  
SMH 26041.666 Hz  
FIDRES 1.589457 Hz  
AQ 0.6291456 sec  
RG 206.87  
DM 19.200 usec  
DE 6.50 usec  
TE 299.2 K  
D1 1.0000000 sec  
D11 0.0300000 sec  
TDO 1  
SFO1 100.6404331 MHz  
NUC1 13C  
PC 3.33 usec  
P1 10.00 usec  
PLM1 56.0000000 W  
SFO2 400.2016008 MHz  
NUC2 1H  
CPDPRG2 waltz16  
PCPD2 90.00 usec  
PLM2 14.0000000 W  
PLM12 0.33877000 W  
PLM13 0.17039999 W

F2 - Processing parameters  
SI 32768  
SF 100.6303559 MHz  
WDW EM  
SSB 0  
LB 1.00 Hz  
GB 0  
PC 1.40

173.92  
173.57

72.26

62.14  
61.73

34.44  
34.25  
32.07  
31.79  
29.83  
29.80  
29.76  
29.62  
29.50  
29.41  
29.24  
29.21  
29.05  
25.09  
25.03  
22.83  
22.74  
14.25  
14.19

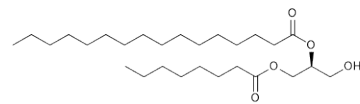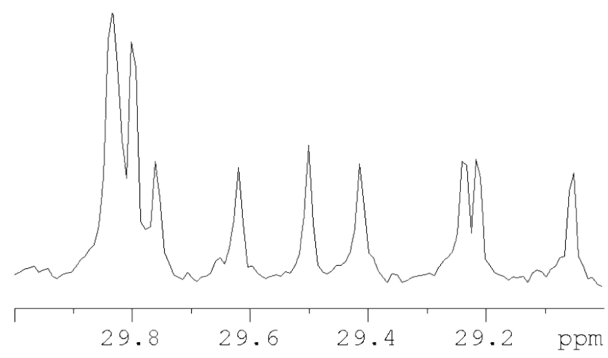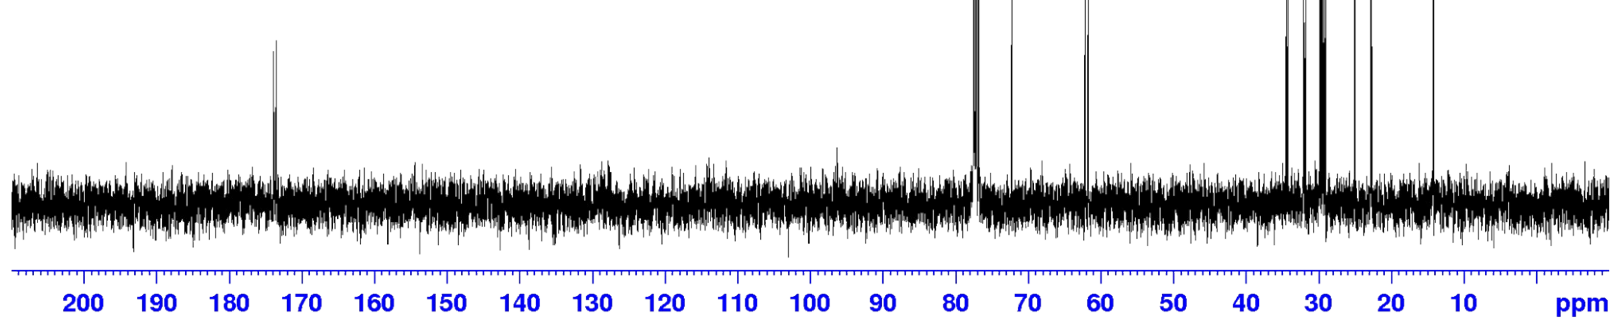

(2S)-1-hydroxy-3-(octanoyloxy)propan-2-yl hexadecanoate (-)-S15 HRMS

Z:\data\2021\05 May\ESI88218.raw 17/05/2021 7:08 pm  
 NL: 9.28E5  
 ESI88218 #14-33 RT: 0.16-0.39 AV: 10 NL:  
 3.42E+006  
 T: FTMS [1.1] + p ESI Full lock ms  
 [80.00-1600.00]

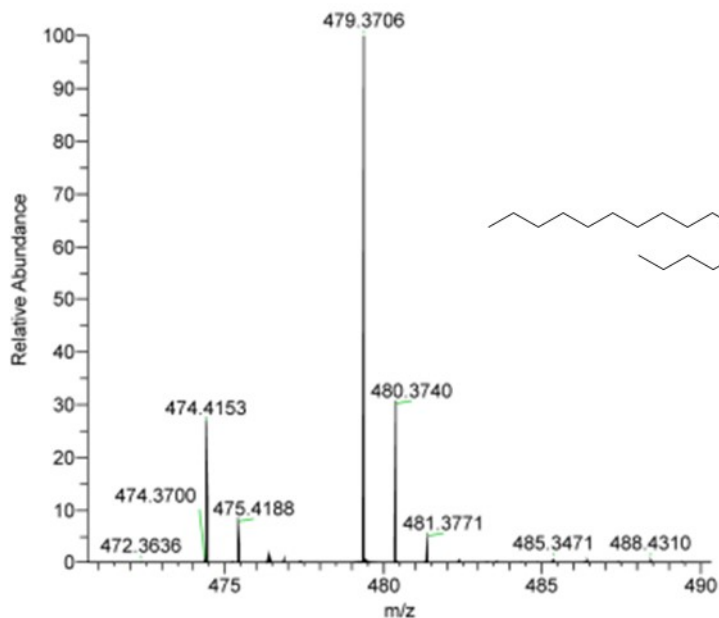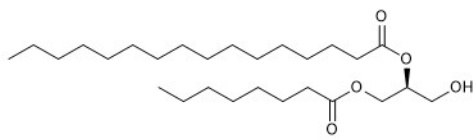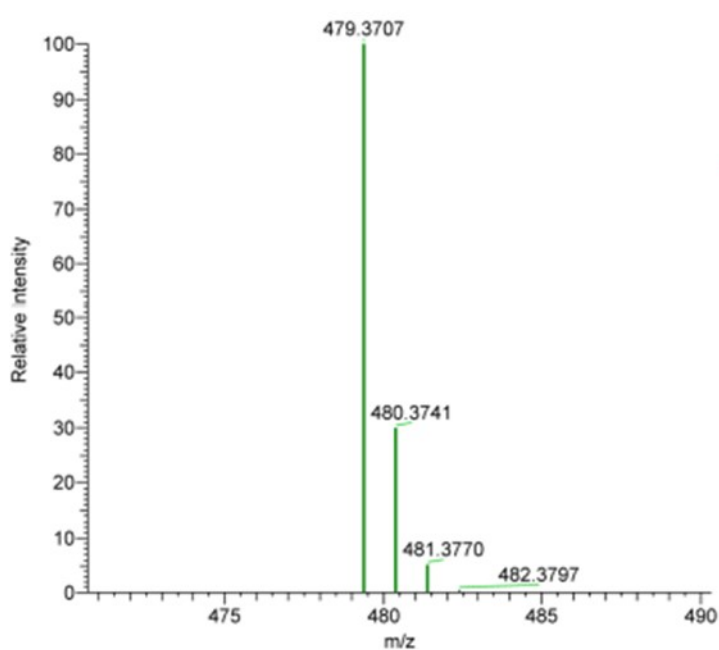

NL: 7.34E5  
 C27H52O5Na1 Chrg 1 R: 36167 Res.  
 Pwr. @FWHM

**Theoretical Spectrum**

| Peak Mass Display... | Combin... | RDB | Delta (p... | Theo. m... | Rank | Combin... | # Match... | # Misse... | MS Cov... | Pattern... | MSMS... |
|----------------------|-----------|-----|-------------|------------|------|-----------|------------|------------|-----------|------------|---------|
| 479.3706             | 1         | 1   | 0.00        | 479.37     | 1    | 1         | 1          | 0          | 100.00    | 100.00     | 100.00  |

**(+)-(2R)-3-((benzyloxy)[di(propan-2-yl)amino]phosphanyl)oxy)-2-(octanoyloxy)propyl hexadecanoate (+)-S16 <sup>1</sup>H NMR**

Current Data Parameters  
 NAME: Apr09-2021-215-BB-0491-3 (D6-C8 phosphoramidite)  
 EXPNO: 1  
 PROCNO: 1  
 F2 - Acquisition Parameters  
 Date\_: 20210409  
 Time: 15:45  
 INSTRUM: av400  
 PROBHD: z100113 01771  
 PULPROG: zgpg  
 TD: 65536  
 SOLVENT: CDCl3  
 NS: 10  
 DS: 2  
 SFO1: 805.220 MHz  
 FIDRES: 0.244532 Hz  
 AQ: 4.0164405 sec  
 RG: 50.45  
 DDF: 60.400 usec  
 DE: 6.50 usec  
 TE: 293.5 K  
 D1: 1.0000000 sec  
 TSD: 1  
 SFO2: 400.1324008 MHz  
 NUC1: 1H  
 P1: 14.00 usec  
 PL1: 14.2000000 W  
 F2 - Processing parameters  
 SI: 32768  
 SF: 400.1320099 MHz  
 WDW: EM  
 GB: 0  
 LB: 0.20 Hz  
 GB: 0  
 PC: 1.00

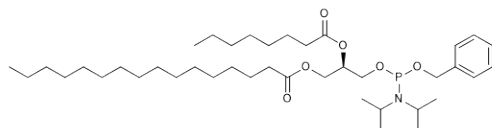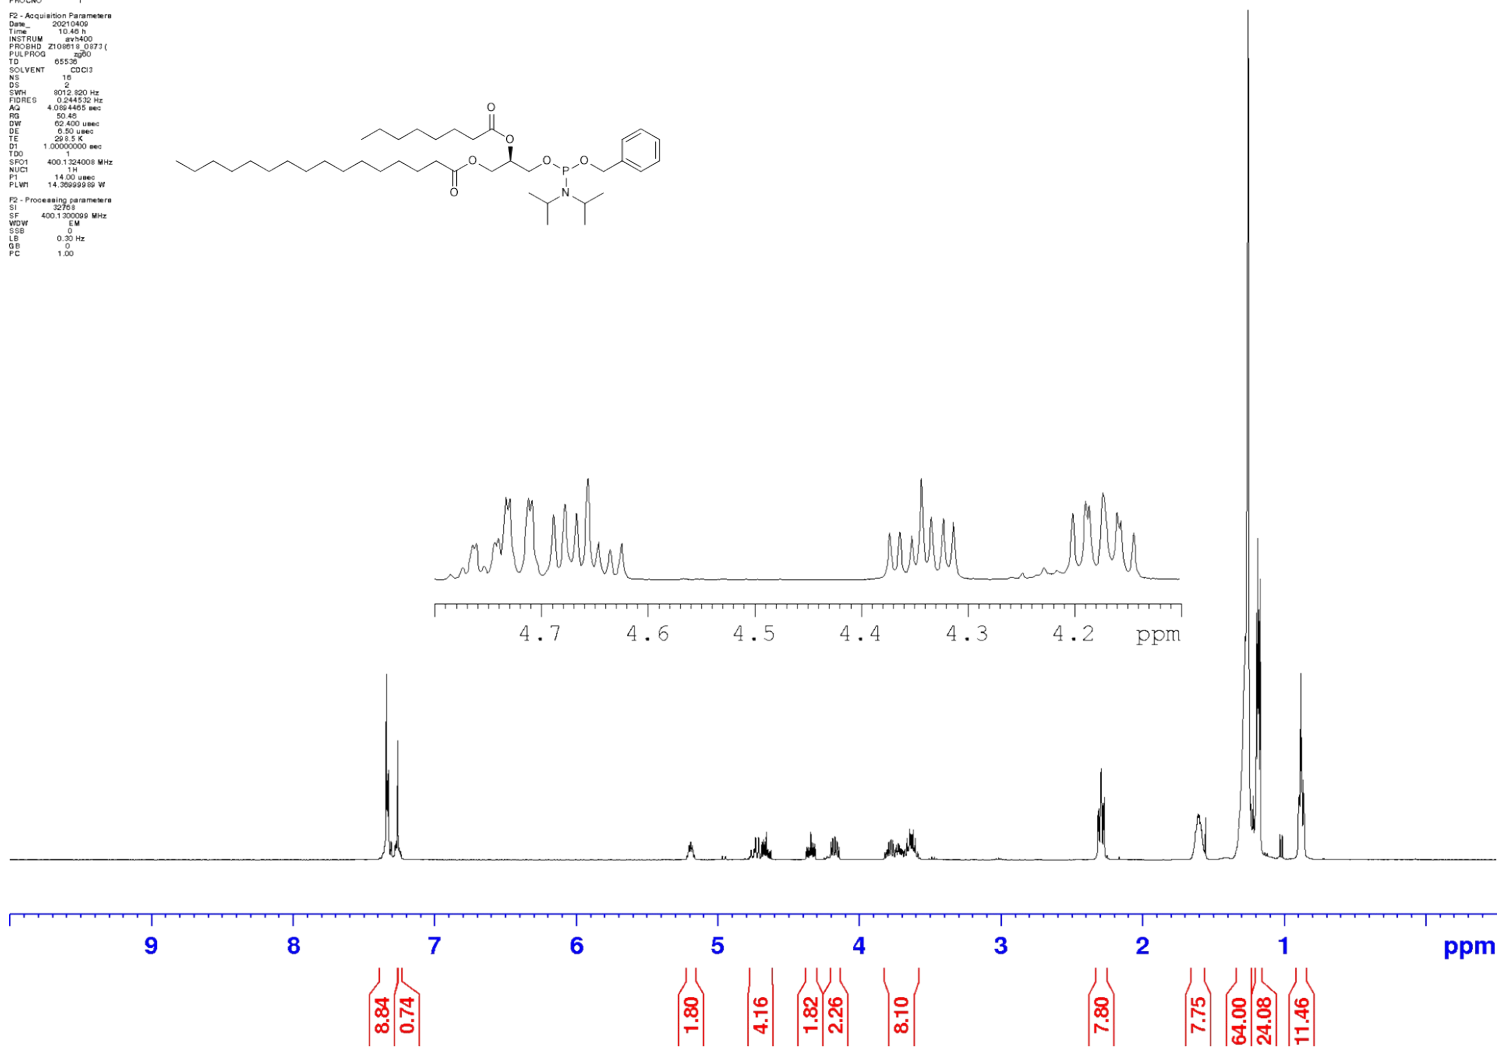

**(+)-(2R)-3-(((benzyloxy)[di(propan-2-yl)amino]phosphanyl)oxy)-2-(octanoyloxy)propyl hexadecanoate (+)-S16 <sup>31</sup>P NMR**

```

Current Data Parameters
NAME      Apr09-2021-26-09-0481-3 (C16-C8 phosphoramidite)
EXPNO     2
PROCNO    1
F2 - Acquisition Parameters
Date_     20210410
Time      1.22 h
INSTRUM   av400
PROCNO    2100618_0079 (
PULPROG   zgpg30
TD         131072
SOLVENT   CDCl3
NS         16
DS         4
SFO       64102.562 Hz
FIDRES    0.976127 Hz
AQ         1.0227616 sec
RG         197.18
DM         7.500 usec
DE         6.50 usec
TE         299.2 K
D1         2.00000000 sec
D11        0.03000000 sec
ZD0        1
SFO1       161.9755500 MHz
NUC1       31P
FO         5.00 usec
P1         15.00 usec
PLM1       13.2079973 W
SFO2       400.1216005 MHz
NUC2       1H
CPDPRG2   waltz16
PCPD2     90.00 usec
PLM2       14.0699989 W
PLM12     0.2472000 W
PLM13     0.17490000 W
F2 - Processing parameters
SI         65536
SF         161.9755500 MHz
WDW        EM
SSB        0
LB         1.00 Hz
GB         0
PC         1.40
    
```

150.00  
149.00  
148.00

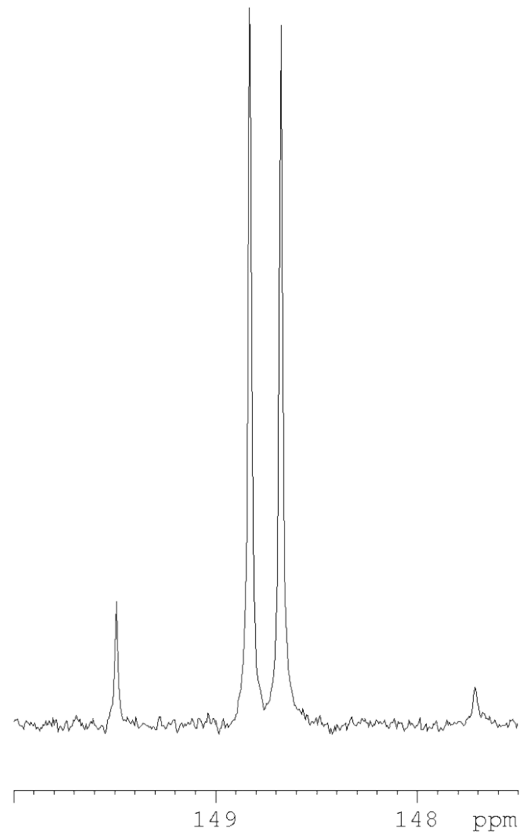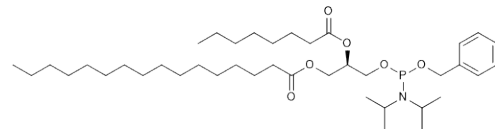

150                    100                    50                    0                    -50                    -100                    -150                    ppm

**(+)-(2R)-3-((benzyloxy)[di(propan-2-yl)amino]phosphanyl)oxy)-2-(octanoyloxy)propyl hexadecanoate (+)-S16 HRMS**

Z:\data\2021\05 May\ESI88245.raw

18/05/2021 2:14 pm

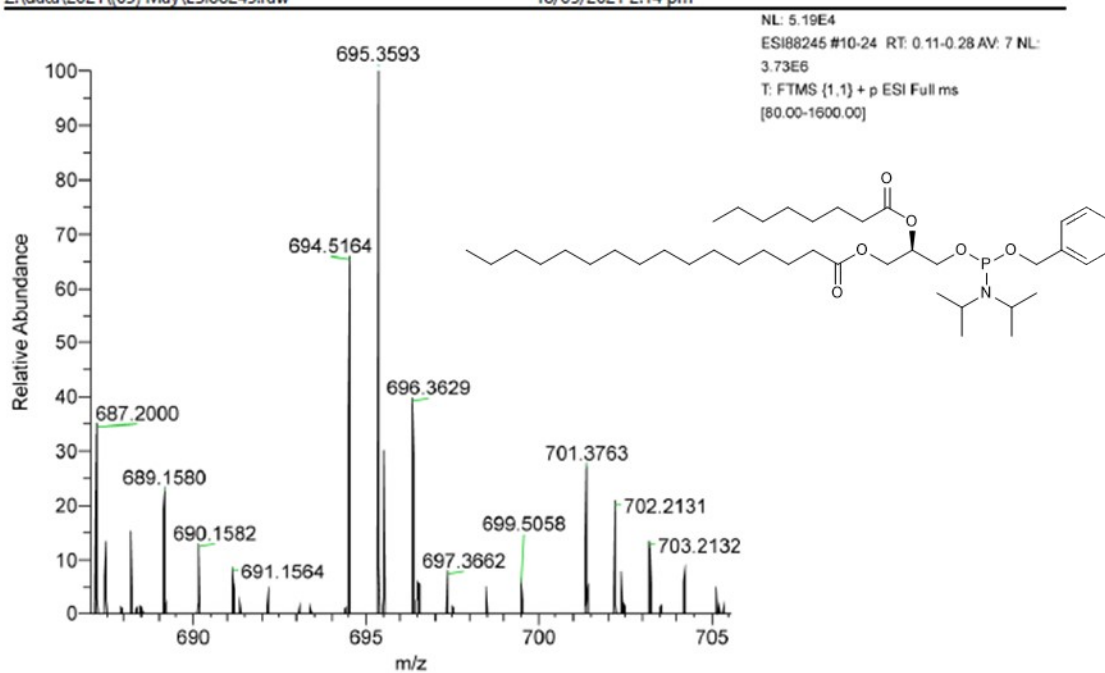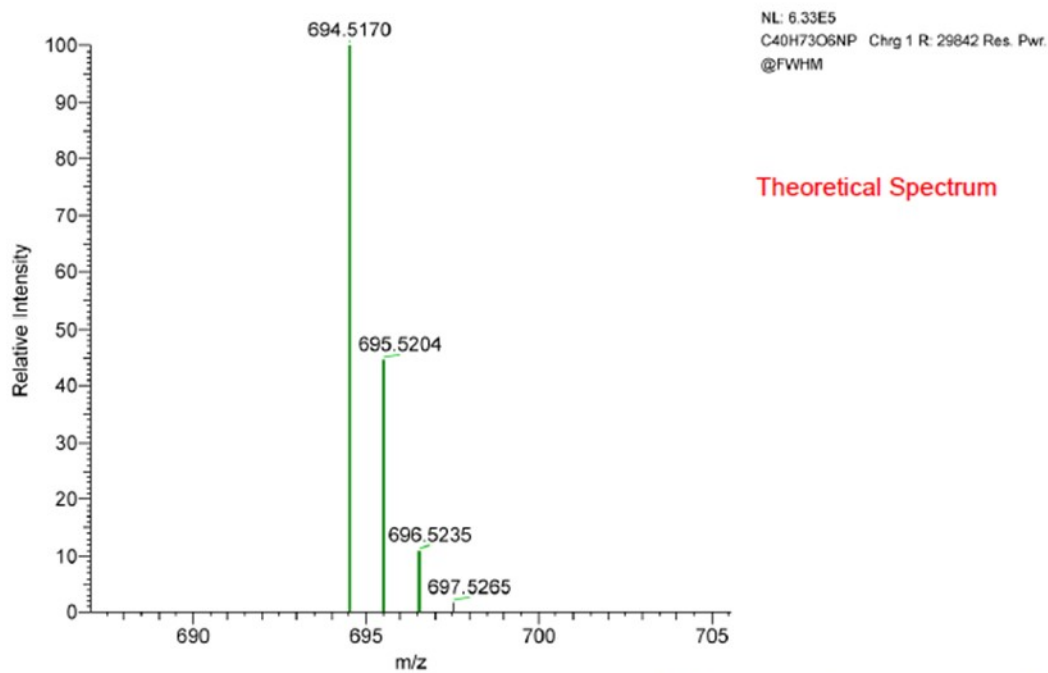

| Peak Mass | Display... | Combin... | RDB  | Delta [p... | Theo. m... | Rank | Combin... | # Match... | # Misse... | MS Cov... | Pattern... | MSMS... |     |        |
|-----------|------------|-----------|------|-------------|------------|------|-----------|------------|------------|-----------|------------|---------|-----|--------|
| 694.5164  | C...H...   | 60        | 5.50 | -0.82       | 694.51     | 1    | 42        | 216        | 2          | 0         | 41         | 302     | 100 | Collor |

**(+)-(7R)-4-(benzyloxy)-2-methyl-10-oxo-3-(propan-2-yl)-5,9-dioxa-3-aza-4-phosphaheptadecan-7-yl hexadecanoate (+)-S17 <sup>1</sup>H NMR**

Current Data Parameters  
 NAME Apr22-2021-05-G-B-052 (C1-C16 phosphoramidite)  
 EXPNO 1  
 PROCNO 1  
 F2 - Acquisition Parameters  
 Date\_ 20210322  
 Time 10:22 h  
 INSTRUM av640  
 PROBHD Z101815\_0116 (1  
 PULPROG zgpg30  
 TD 65536  
 SOLVENT CDCl3  
 NS 2  
 DS 2  
 SWH 8012.820 Hz  
 FIDRES 0.244532 Hz  
 AQ 4.0164405 sec  
 RG 32.24  
 DW 62.400 usec  
 DE 6.30 usec  
 TE 297.5 K  
 DI 1.00000000 sec  
 TDD 1  
 SFO1 400.2024012 MHz  
 NUC1 1H  
 P1 14.00 usec  
 PLW1 14.00000000 W  
 F2 - Processing parameters  
 SI 32768  
 SF 400.2024012 MHz  
 WDW EM  
 SSB 0  
 LB 0.30 Hz  
 GB 0  
 PC 1.00

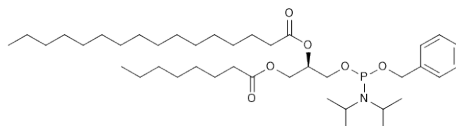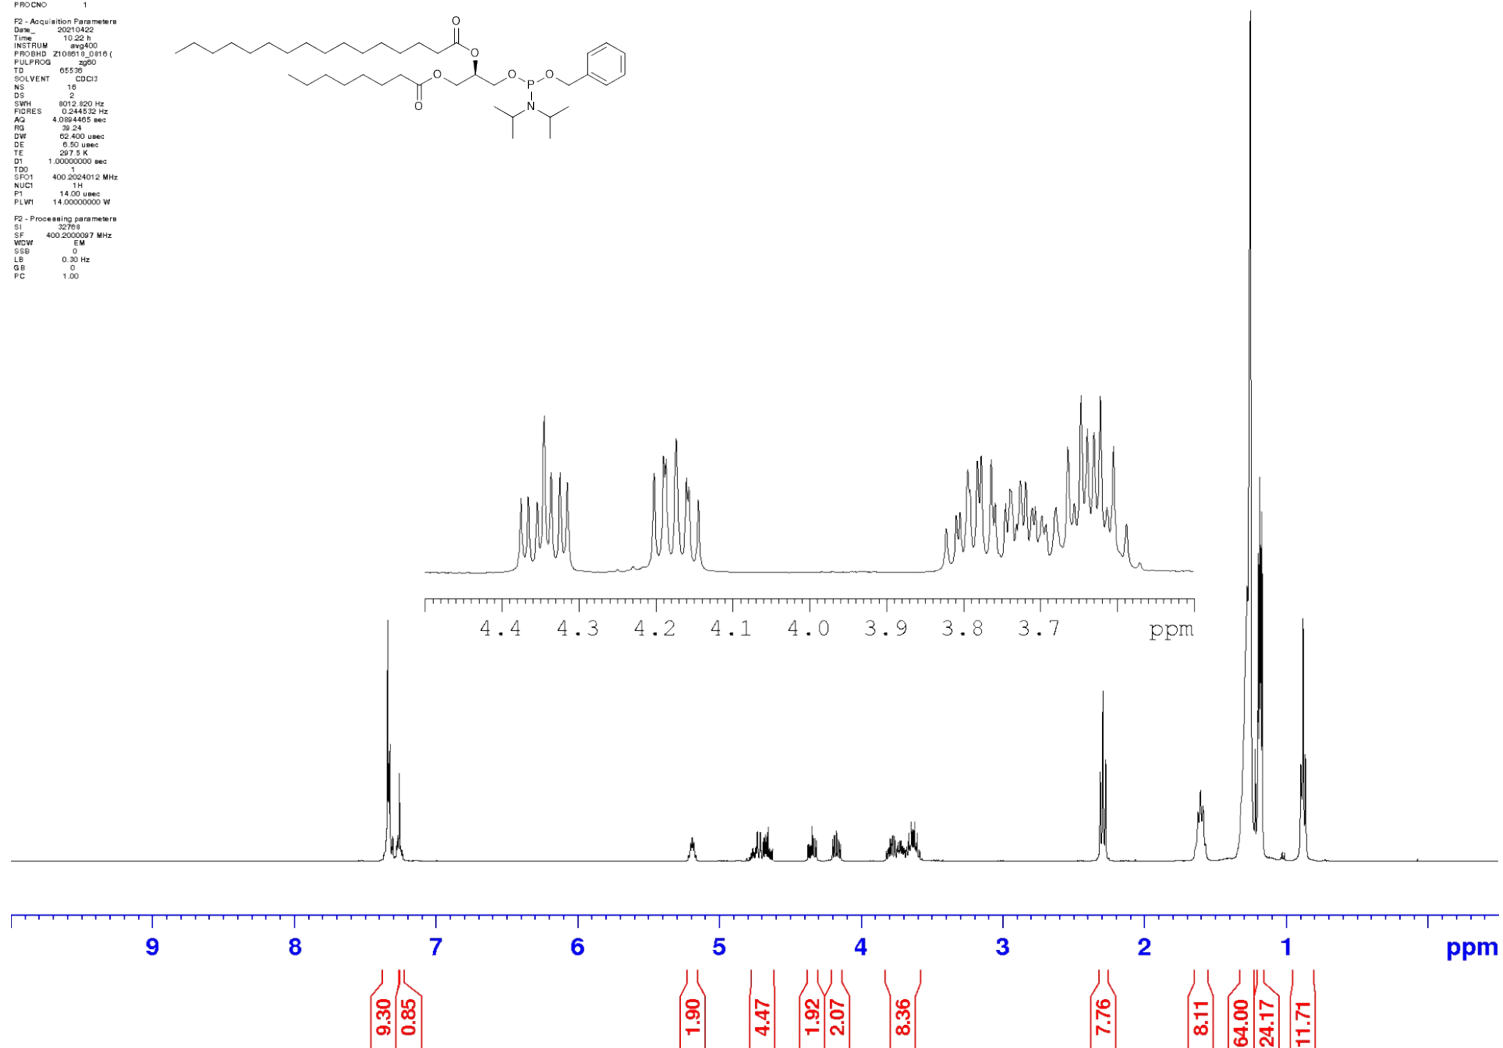

**(+)-(7R)-4-(benzyloxy)-2-methyl-10-oxo-3-(propan-2-yl)-5,9-dioxa-3-aza-4-phosphaheptadecan-7-yl hexadecanoate (+)-S17 <sup>31</sup>P NMR**

Current Data Parameters  
NAME Apr22-2021-26-QB-052 (08-c16 phosphoramidite)  
EXPNO 2  
PROCNO 1

F2 - Acquisition Parameters  
Date\_ 20210422  
Time 10.25 h  
INSTRUM avq400  
PROCNO 2108618\_0816 ( 4 0 0 3  
PULPROG zgpg30 1 4 0 0 0 7  
TD 131072  
SOLVENT cdc13  
MS 16  
DE 4  
SWH 64102.562 Hz  
FIDRES 0.978127 Hz  
AQ 1.0231616 sec  
RG 206.87  
DW 7.800 usec  
DE 6.50 usec  
TE 298.0 K  
D1 2.0000000 sec  
D11 0.0300000 sec  
TDS 1  
SFO1 162.0039295 MHz  
NUC1 31P  
FO 5.00 usec  
PI 15.00 usec  
PLW1 13.0000000 W  
SFO2 400.2016008 MHz  
NUC2 1H  
CPDPRG2 waltz16  
PCPD 90.00 usec  
PLW2 14.0000000 W  
PLW12 0.33877000 W  
PLW13 0.11039999 W  
F2 - Processing parameters  
SI 65536  
SF 162.0039295 MHz  
WDW EM  
SSB 0  
LB 1.00 Hz  
GB 0  
PC 1.40

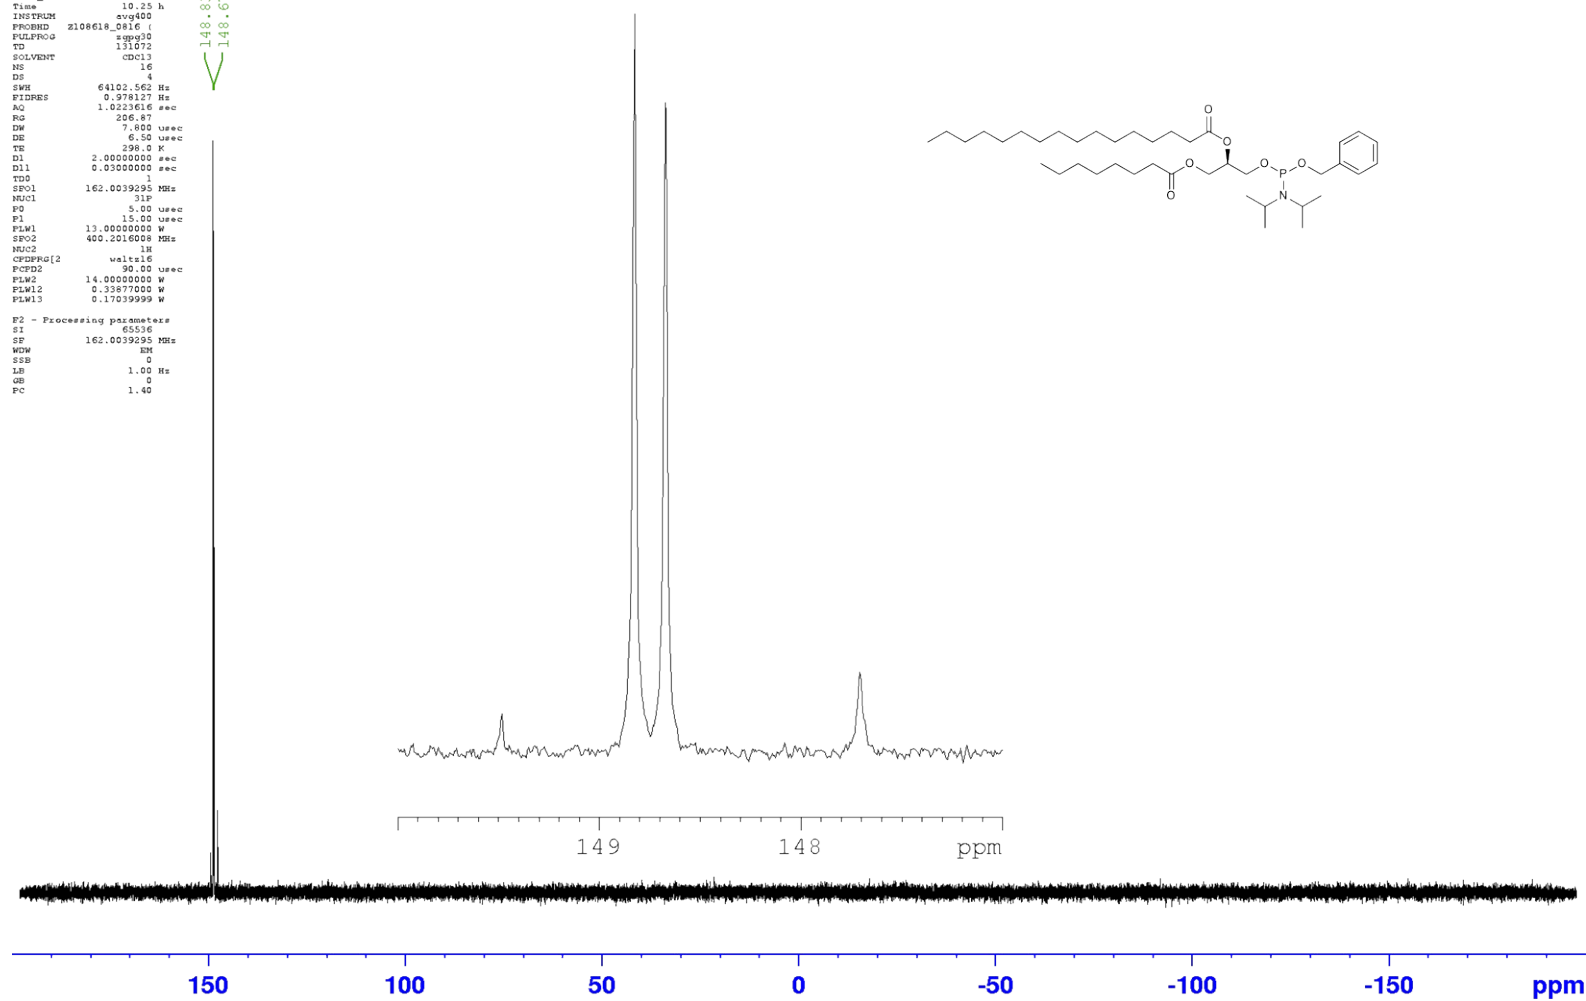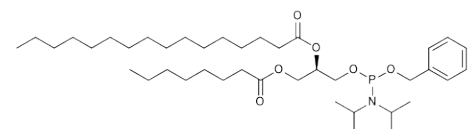

(+)-(2R)-3-[[[(benzyloxy)((3aR,4S,5R,6S,7R,7aR)-5,7-bis(benzyloxy)-6-[(3-oxo-1,5-dihydro-3H-2,4,3λ5-benzodioxaphosphepin-3-yl)oxy]hexahydrospiro[1,3-benzodioxole-2,1'-cyclopentan]-4-yl)oxy)phosphoryl]oxy]-2-(octanoyloxy)propyl hexadecanoate (+)-S18 <sup>1</sup>H NMR

Current Data Parameters  
 NAME g062201809 (c16-C8 protected Inositol)  
 EXPNO 1  
 PROCNO 1

F2 - Acquisition Parameters  
 Date\_ 20210520  
 Time 13:44 h  
 INSTRUM Avance  
 PROBHD z19009 0120 (PULPROG zg30  
 TD 65536  
 SOLVENT CDCl3  
 NS 16  
 DS 2  
 SWH 11804.762 Hz  
 FIDRES 0.363304 Hz  
 AQ 2.7529120 sec  
 RG 66.8698  
 DW 42.000 usec  
 DE 22.000 usec  
 TE 298.0 K  
 D1 1.0000000 sec  
 TDO 1  
 SFO1 600.4230021 MHz  
 NUC1 1H  
 P0 4.00 usec  
 P1 12.00 usec  
 PLW1 13.9120006 W

F2 - Processing parameters  
 SI 65536  
 SF 600.4230021 MHz  
 WDW EM  
 SSB 0  
 LB 0.30 Hz  
 GB 0  
 PC 1.00

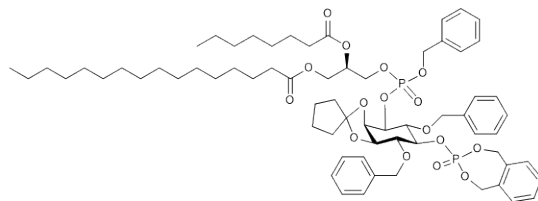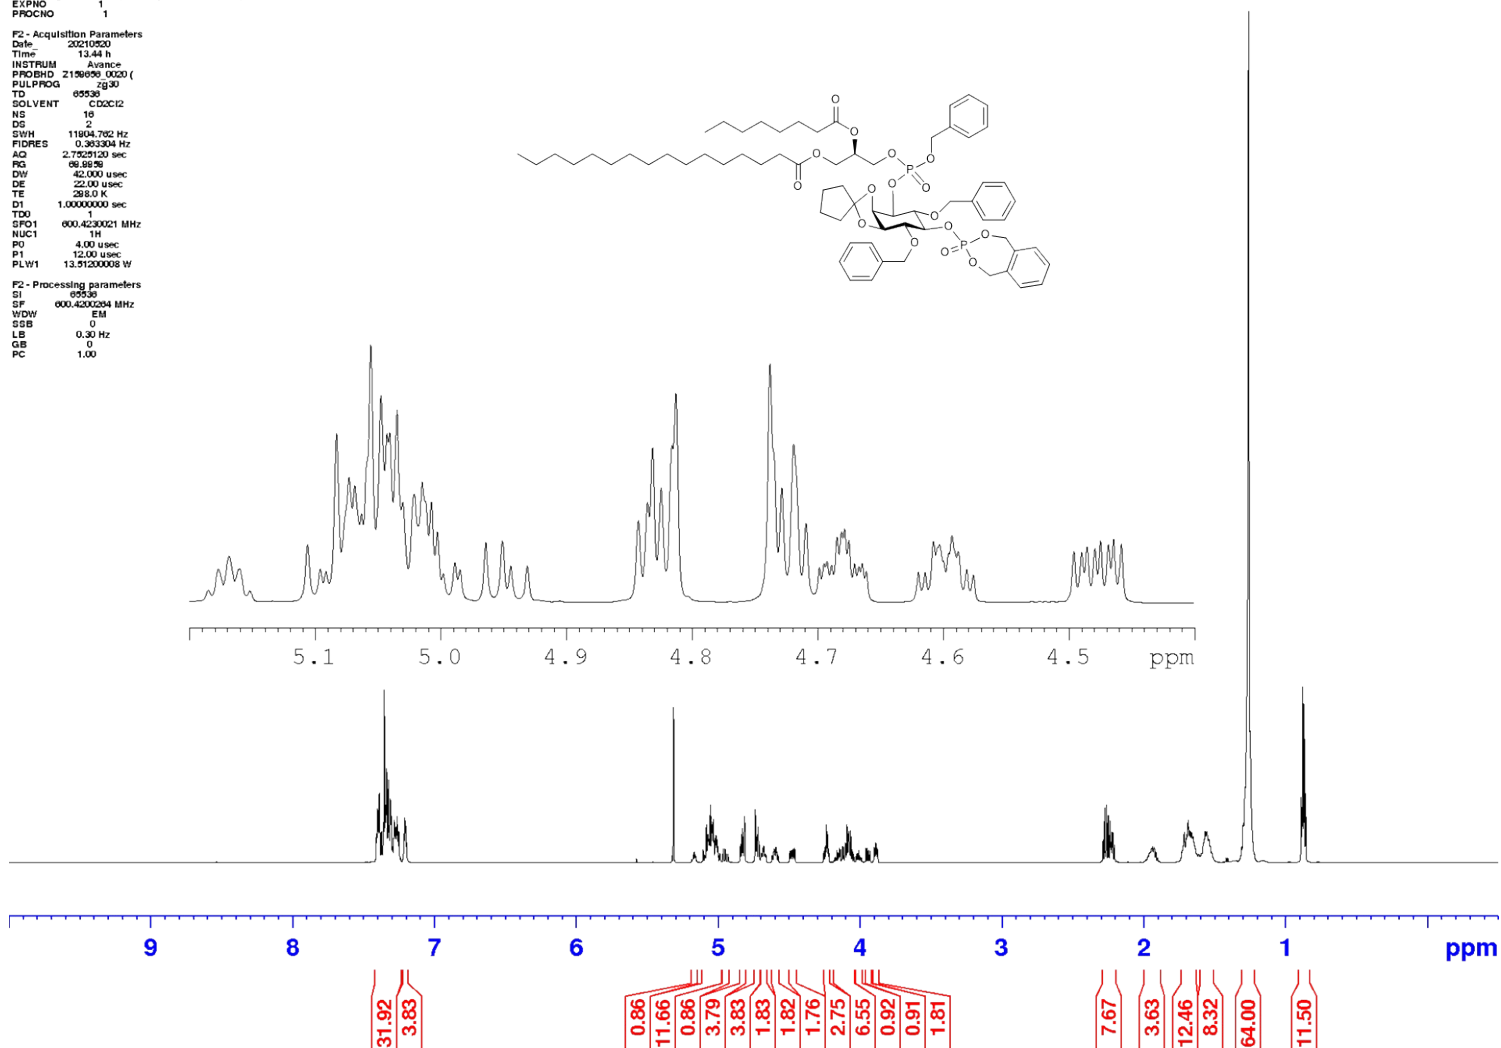

**(+)-(2R)-3-[[[(benzyloxy)((3aR,4S,5R,6S,7R,7aR)-5,7-bis(benzyloxy)-6-[(3-oxo-1,5-dihydro-3H-2,4,3λ5-benzodioxaphosphepin-3-yl)oxy]hexahydrospiro[1,3-benzodioxole-2,1'-cyclopentan]-4-yl)oxy)phosphoryl]oxy]-2-(octanoyloxy)propyl hexadecanoate (+)-S18 <sup>31</sup>P NMR**

Current Data Parameters  
 NAME g962261905 (C16-C8 protected inositol)  
 EXPNO 5  
 PROCNO 1

F2 - Acquisition Parameters

Date\_ 20210520  
 Time 14.45 h  
 INSTRUM Avance  
 PROBHD Z159656\_0020 (1  
 PULPROG zgpg30  
 TD 65536  
 SOLVENT CD2Cl2  
 NS 512  
 DS 4  
 SWH 48943.688 Hz  
 FIDRES 1.481436 Hz  
 AQ 0.6750208 sec  
 RG 101  
 DW 10.500 usec  
 DE 18.00 usec  
 TE 298.0 K  
 D1 2.0000000 sec  
 D11 0.0300000 sec  
 TD0 1  
 SFO1 243.0423184 MHz  
 NUC1 <sup>31</sup>P  
 PD 4.00 usec  
 F1 12.00 usec  
 PL1 39.4080000 W  
 SFO2 600.4224017 MHz  
 NUC2 <sup>1</sup>H  
 CDEPRG(2) Waltz16  
 ECPD2 80.00 usec  
 PLM2 13.5120000 W  
 PLM12 0.30124050 W  
 PLM13 0.13098180 W

F2 - Processing parameters

SI 32768  
 SF 243.0544711 MHz  
 WDW EM  
 SSB 0  
 LB 1.00 Hz  
 GB 0  
 PC 1.40

1.091  
 1.80  
 1.96

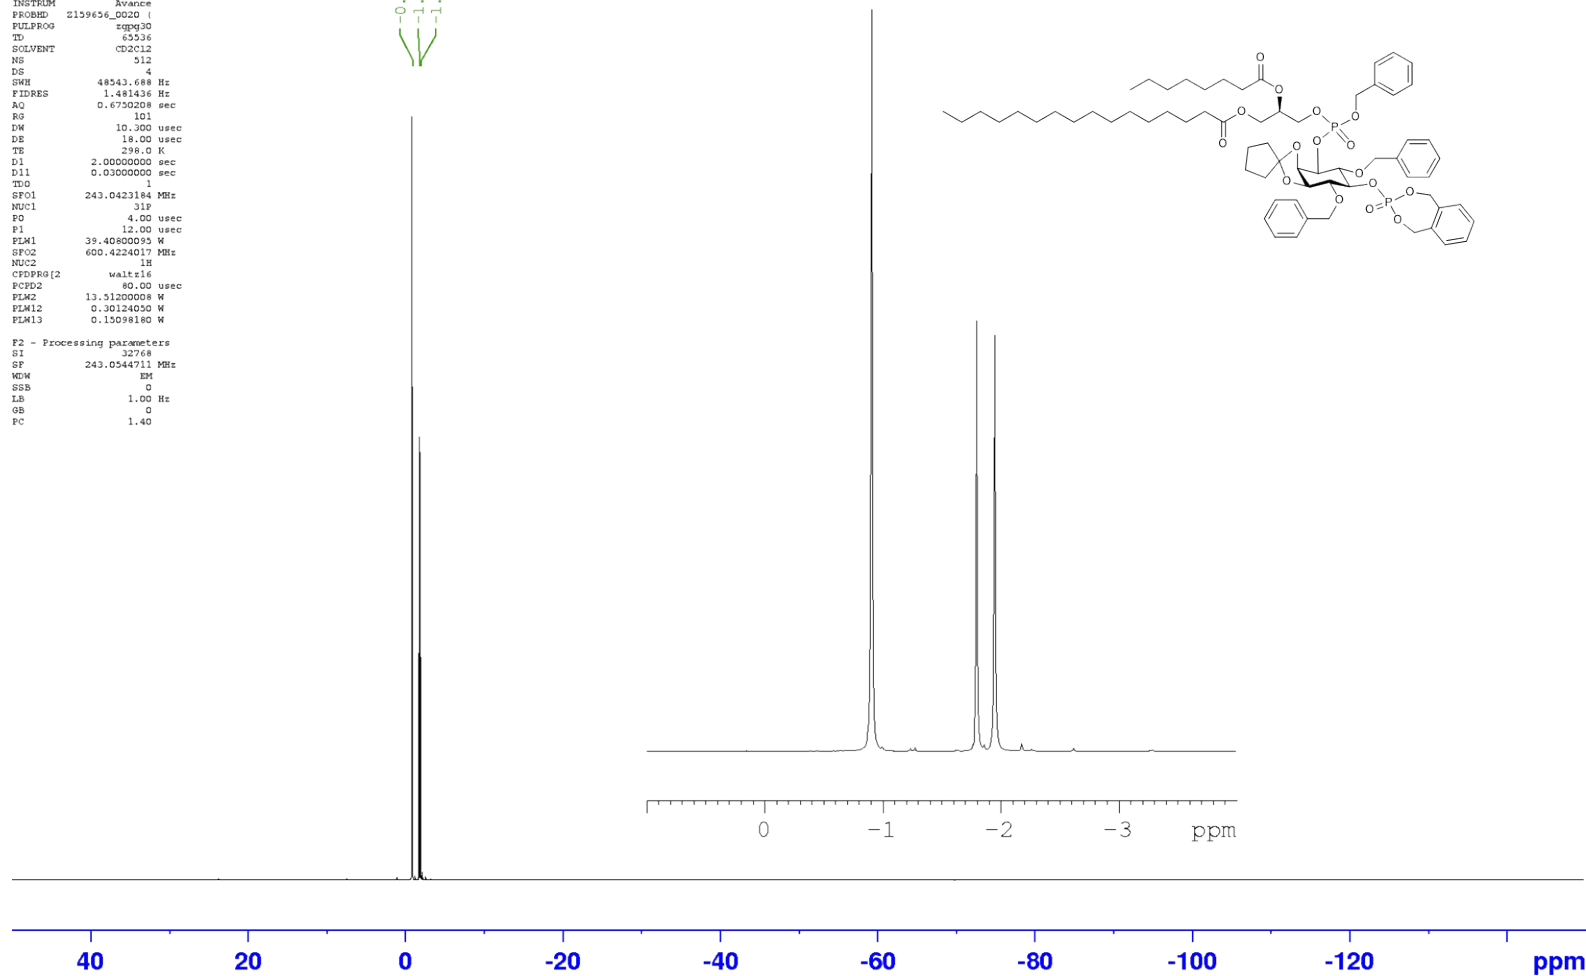

**(+)-(2R)-3-[(benzyloxy)((3aR,4S,5R,6S,7R,7aR)-5,7-bis(benzyloxy)-6-[(3-oxo-1,5-dihydro-3H-2,4,3λ5-benzodioxaphosphepin-3-yl)oxy]hexahydrospiro[1,3-benzodioxole-2,1'-cyclopentan]-4-yl)oxy]phosphoryl]oxy}-2-(octanoyloxy)propyl hexadecanoate (+)-S18 <sup>13</sup>C NMR**

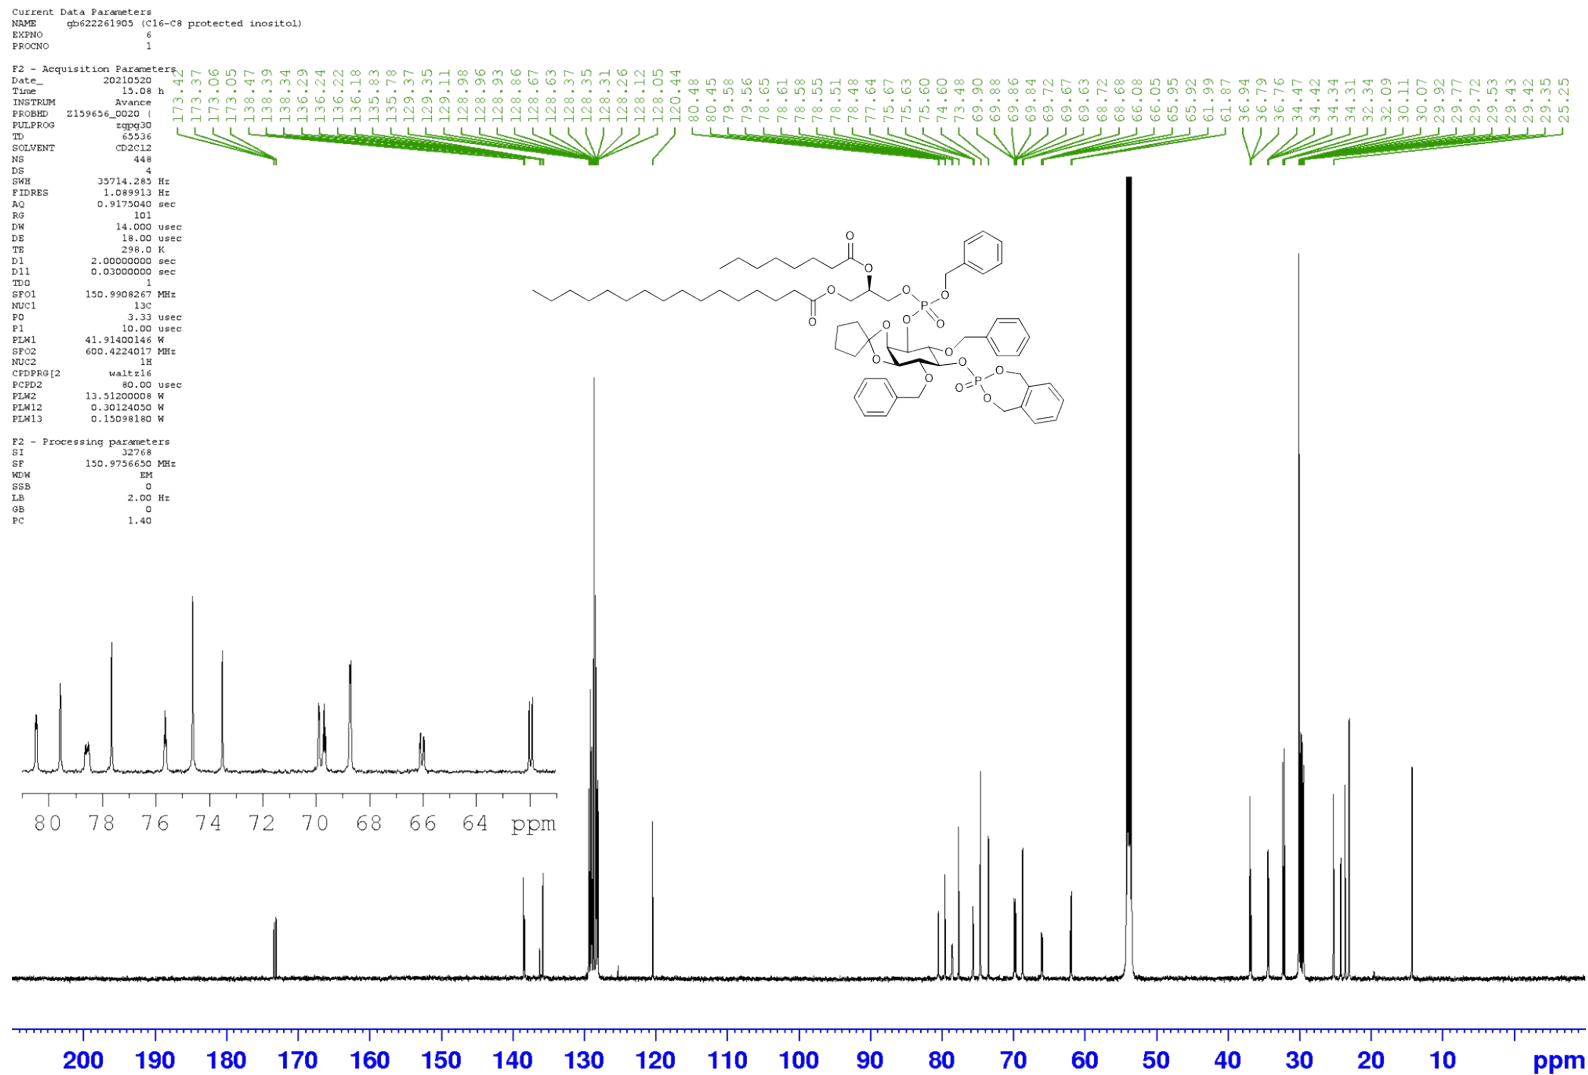

**(+)-(2R)-3-[[[(benzyloxy){(3aR,4S,5R,6S,7R,7aR)-5,7-bis(benzyloxy)-6-[(3-oxo-1,5-dihydro-3H-2,4,3λ5-benzodioxaphosphepin-3-yl)oxy]hexahydrospiro[1,3-benzodioxole-2,1'-cyclopentan]-4-yl)oxy]phosphoryl]oxy}-2-(octanoyloxy)propyl hexadecanoate (+)-S18 HPLC 254nm**

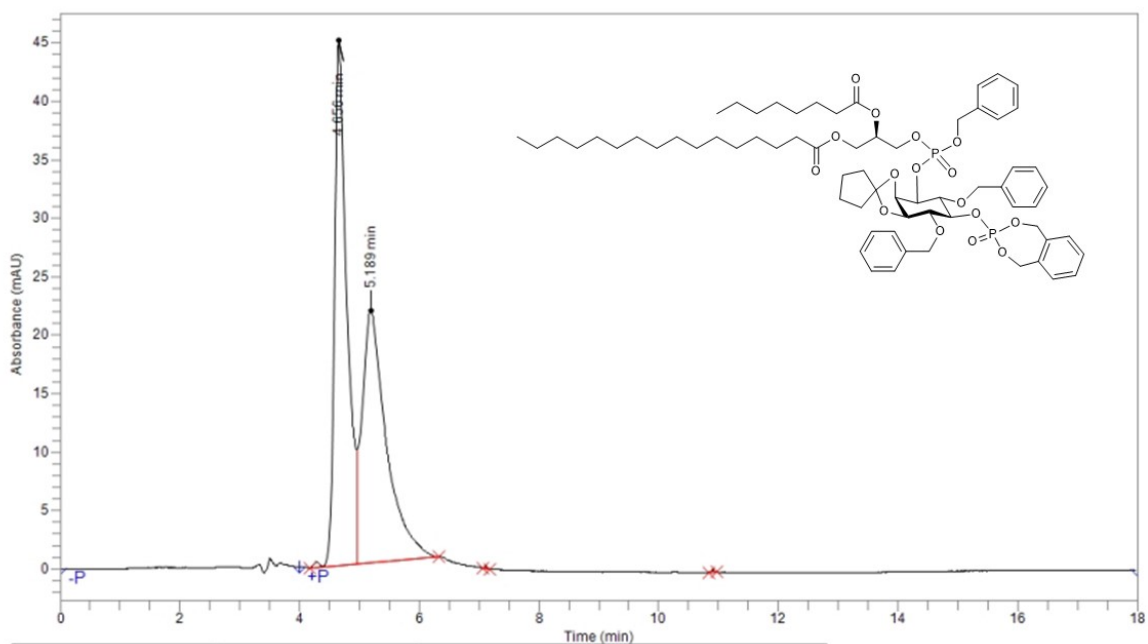

| Time         | Height   | Area        | Area % |
|--------------|----------|-------------|--------|
| 4.278        | 477.3    | 2,996.1     | 0.24   |
| 4.656        | 44,957.3 | 649,405.9   | 51.36  |
| 5.189        | 21,603.0 | 610,963.4   | 48.32  |
| 7.115        | 164.2    | 432.9       | 0.03   |
| 10.910       | 231.5    | 683.8       | 0.05   |
| <b>Total</b> |          | 1,264,482.1 | 100.00 |

**(+)-(2R)-3-[[[(benzyloxy){(3aR,4S,5R,6S,7R,7aR)-5,7-bis(benzyloxy)-6-[(3-oxo-1,5-dihydro-3H-2,4,3λ5-benzodioxaphosphepin-3-yl)oxy]hexahydrospiro[1,3-benzodioxole-2,1'-cyclopentan]-4-yl}oxy]phosphoryl]oxy]-2-(octanoyloxy)propyl hexadecanoate (+)-S18 HPLC 220nm**

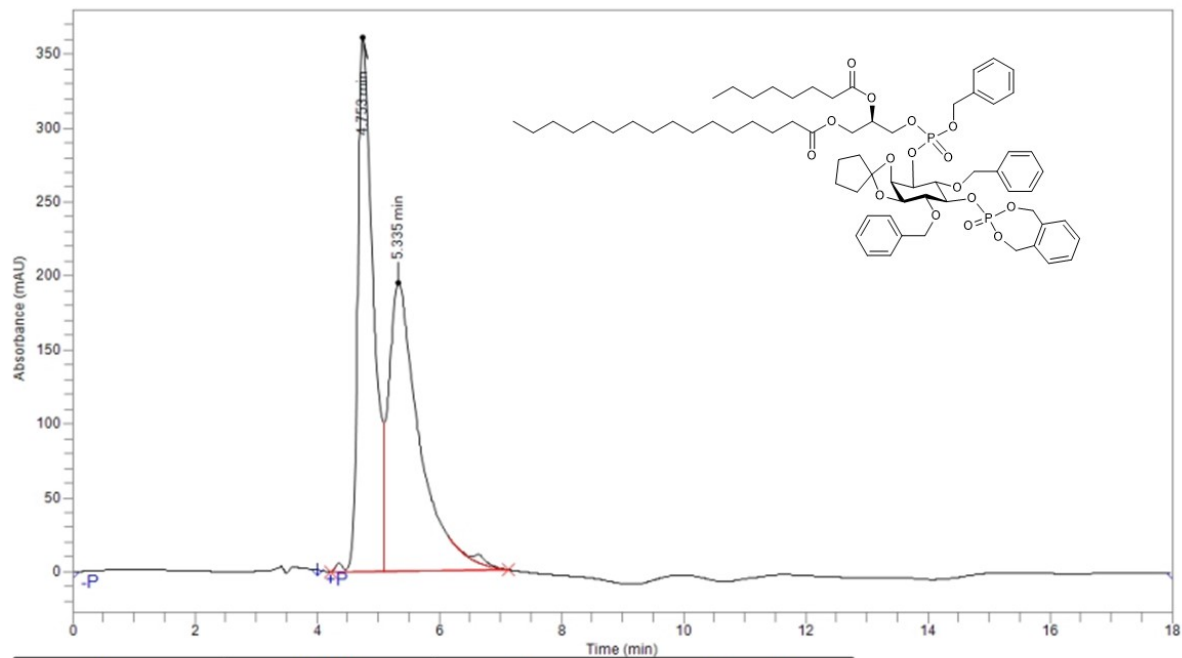

| Time         | Height    | Area         | Area % |
|--------------|-----------|--------------|--------|
| 4.355        | 6,102.3   | 45,838.7     | 0.34   |
| 4.753        | 361,524.5 | 6,326,487.7  | 47.36  |
| 5.335        | 194,836.1 | 6,893,991.7  | 51.61  |
| 6.636        | 5,553.0   | 91,593.1     | 0.69   |
| <b>Total</b> |           | 13,357,911.2 | 100.00 |

**(+)-(2R)-3-[[[(benzyloxy){(3aR,4S,5R,6S,7R,7aR)-5,7-bis(benzyloxy)-6-[(3-oxo-1,5-dihydro-3H-2,4,3λ5-benzodioxaphosphepin-3-yl)oxy]hexahydrospiro[1,3-benzodioxole-2,1'-cyclopentan]-4-yl}oxy)phosphoryl]oxy}-2-(octanoyloxy)propyl hexadecanoate (+)-S18 HRMS**

Z:\data\2021\05\May\ESI88203.raw

17/05/2021 6:47 pm

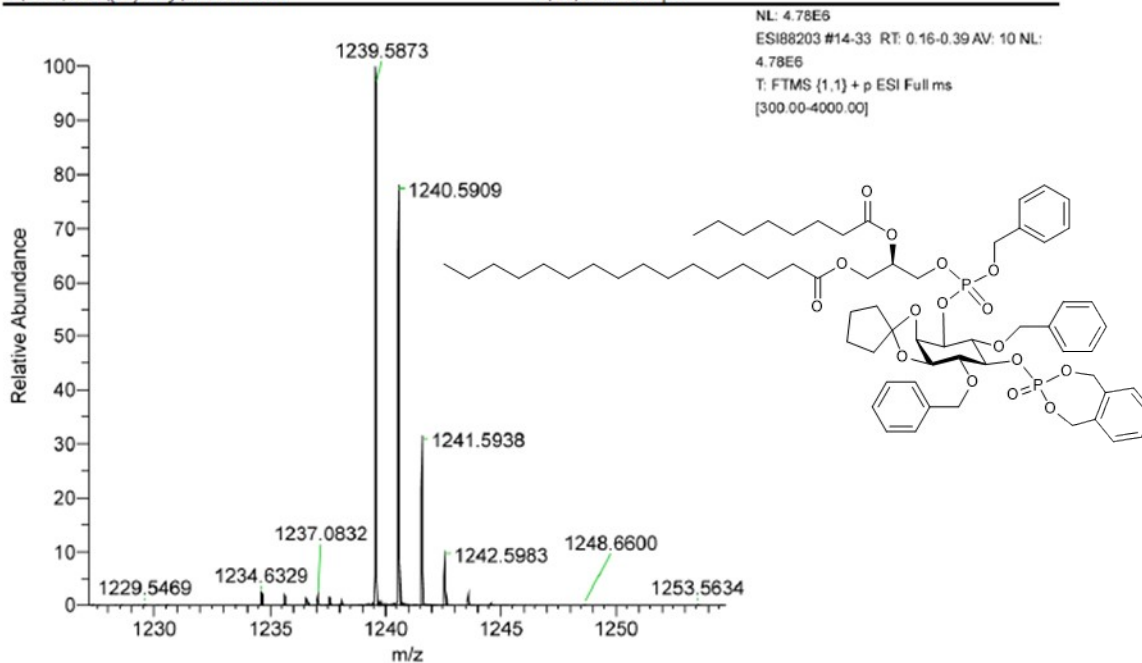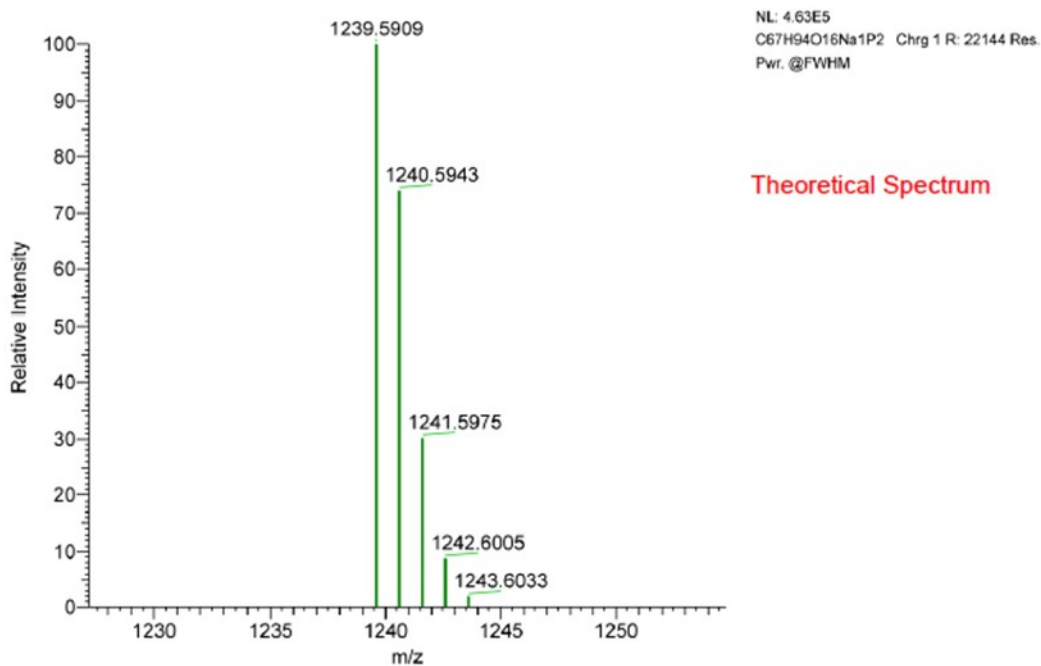

| Peak Mass Display... | Combin... | RDB    | Delta [p... | Theo. m... | Rank | Combin... | # Match... | # Misse... | MS Cov... | Pattern... | MSMS... |
|----------------------|-----------|--------|-------------|------------|------|-----------|------------|------------|-----------|------------|---------|
| 1239.5               | C...H...  | 58.787 | 21.50       | 1239.5     | 1    | 94.329    | 6          | 0          | 96.304    | 100        | Collar  |

(+)-(6R)-3-((3aR,4S,5R,6S,7R,7aR)-5,7-bis(benzyloxy)-6-[(3-oxo-1,5-dihydro-3H-2,4,3λ5-benzodioxaphosphepin-3-yl)oxy]hexahydrospiro[1,3-benzodioxole-2,1'-cyclopentan]-4-yl)oxy)-3,9-dioxo-1-phenyl-2,4,8-trioxa-3λ5-phosphahexadecan-6-yl hexadecanoate (+)-S19 <sup>1</sup>H NMR

Current Data Parameters  
 NAME g16c0773009 (c9-C16 protected Inositol)  
 EXPNO 1  
 PROCNO 1

F2 - Acquisition Parameters  
 Date\_ 20210309  
 Time 11:42 h  
 INSTRUM Avance  
 PROBHD 21mmQNP 1300 (1  
 PULPROG zg30  
 TD 65536  
 SOLVENT CDCl3  
 NS 16  
 DS 2  
 SWH 11804.762 Hz  
 FIDRES 0.36304 Hz  
 AQ 2.729120 sec  
 RG 47.4347  
 DW 42.000 usec  
 DE 23.00 usec  
 TE 298.0 K  
 D1 1.0000000 sec  
 TDO 1  
 SFO1 600.4230021 MHz  
 NUC1 1H  
 P0 4.00 usec  
 P1 12.00 usec  
 PLW1 13.2120000 W

F2 - Processing parameters  
 SI 65536  
 SF 600.4230000 MHz  
 WDW EM  
 SSB 0  
 LB 0.30 Hz  
 GB 0  
 PC 1.00

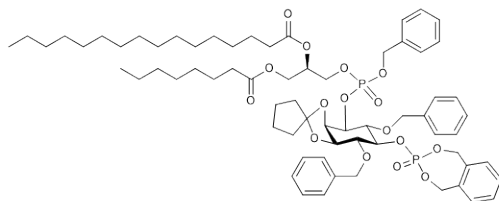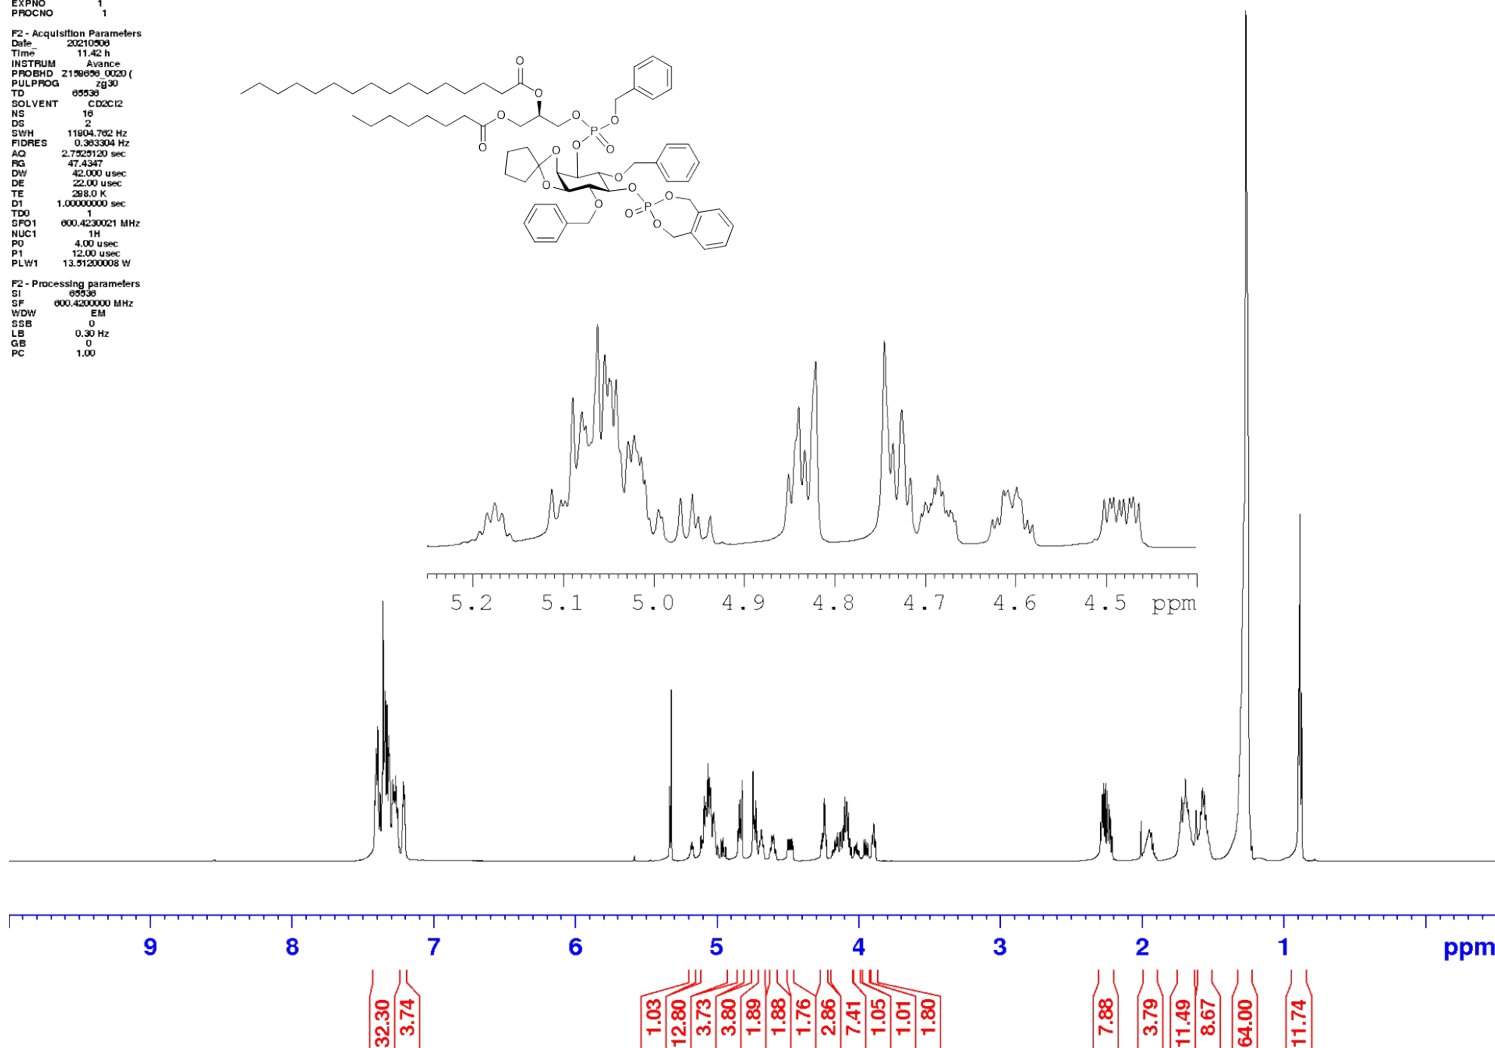

**(+)-(6R)-3-((3aR,4S,5R,6S,7R,7aR)-5,7-bis(benzyloxy)-6-[(3-oxo-1,5-dihydro-3H-2,4,3λ5-benzodioxaphosphepin-3-yl)oxy]hexahydrospiro[1,3-benzodioxole-2,1'-cyclopentan]-4-yl)oxy)-3,9-dioxo-1-phenyl-2,4,8-trioxa-3λ5-phosphahexadecan-6-yl hexadecanoate (+)-S19 <sup>31</sup>P NMR**

```

Current Data Parameters
NAME      gms20770605 (C8-C16 protected inositol)
EXPNO    7
PROCNO   1

F2 - Acquisition Parameters
Date_    20210503
Time     12.26 h
INSTRUM  avq400
PROBHD   Z108618_0816 (
PULPROG  zgpg30
TD       131072
SOLVENT  CD2CL2
NS       16
DS       4
SWH      64102.562 Hz
FIDRES   0.978127 Hz
AQ       1.0223616 sec
RG       206.87
DM       7.800 usec
DE       6.50 usec
TE       298.1 K
D1       2.0000000 sec
D11      0.0300000 sec
TD0      1
SFO1     162.0039295 MHz
NUC1     31P
PD       5.00 usec
P1       15.00 usec
PLA1     13.0000000 W
SFO2     400.2016008 MHz
NUC2     1H
CDEPRG2  waltz16
ECPD2    90.00 usec
PLM2     14.0000000 W
PLM12    0.33877050 W
PLM13    0.17639999 W

F2 - Processing parameters
SI       65536
SF       162.0039295 MHz
WDW      EM
SSB      0
LB       1.00 Hz
GB       0
PC       1.40
    
```

-0.91  
 -1.80  
 -1.94

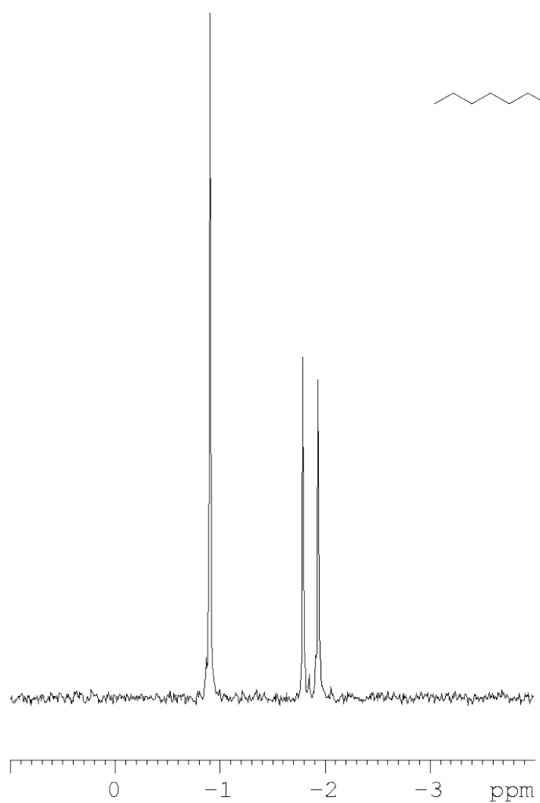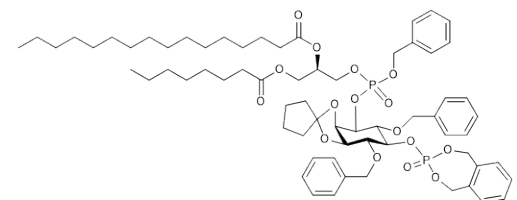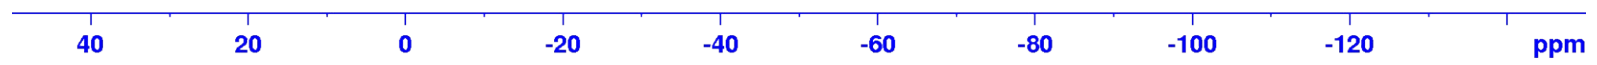

**(+)-(6R)-3-((3aR,4S,5R,6S,7R,7aR)-5,7-bis(benzyloxy)-6-[(3-oxo-1,5-dihydro-3H-2,4,3λ5-benzodioxaphosphepin-3-yl)oxy]hexahydrospiro[1,3-benzodioxole-2,1'-cyclopentan]-4-yl)oxy)-3,9-dioxo-1-phenyl-2,4,8-trioxa-3λ5-phosphahexadecan-6-yl hexadecanoate (+)-S19 <sup>13</sup>C NMR**

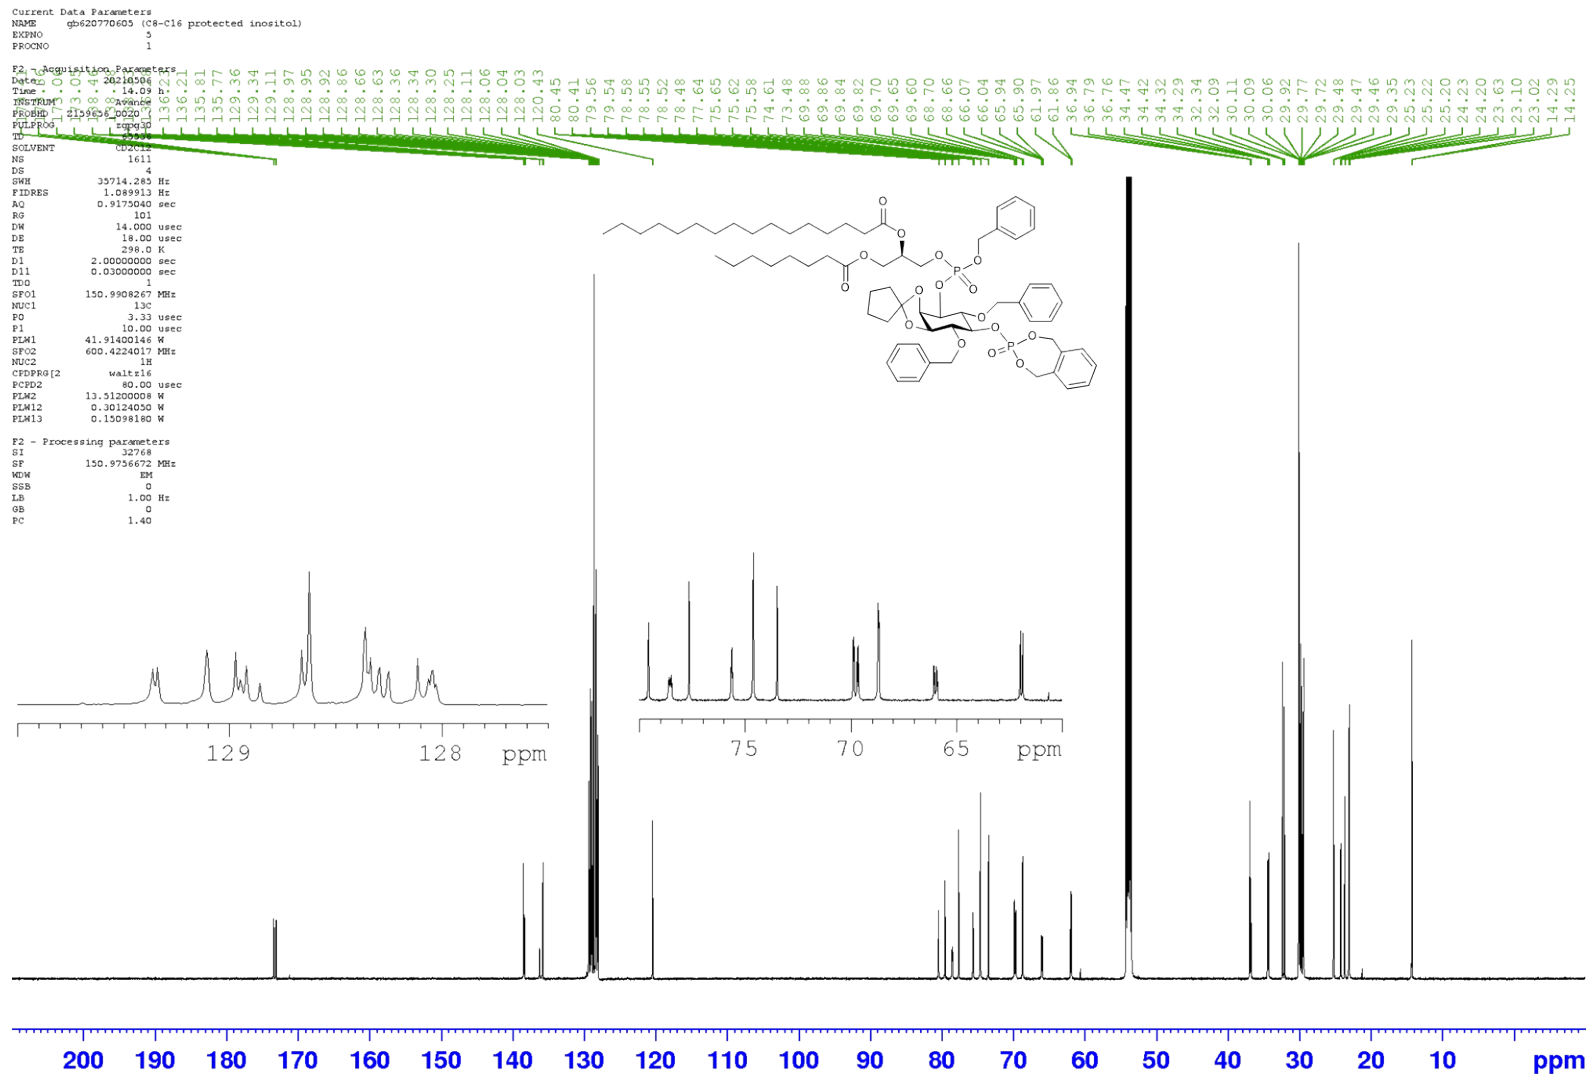

(+)-(6R)-3-((3aR,4S,5R,6S,7R,7aR)-5,7-bis(benzyloxy)-6-[(3-oxo-1,5-dihydro-3H-2,4,3λ5-benzodioxaphosphepin-3-yl)oxy]hexahydrospiro[1,3-benzodioxole-2,1'-cyclopentan]-4-yl)oxy)-3,9-dioxo-1-phenyl-2,4,8-trioxa-3λ5-phosphahexadecan-6-yl hexadecanoate (+)-S19 HPLC 254 nm

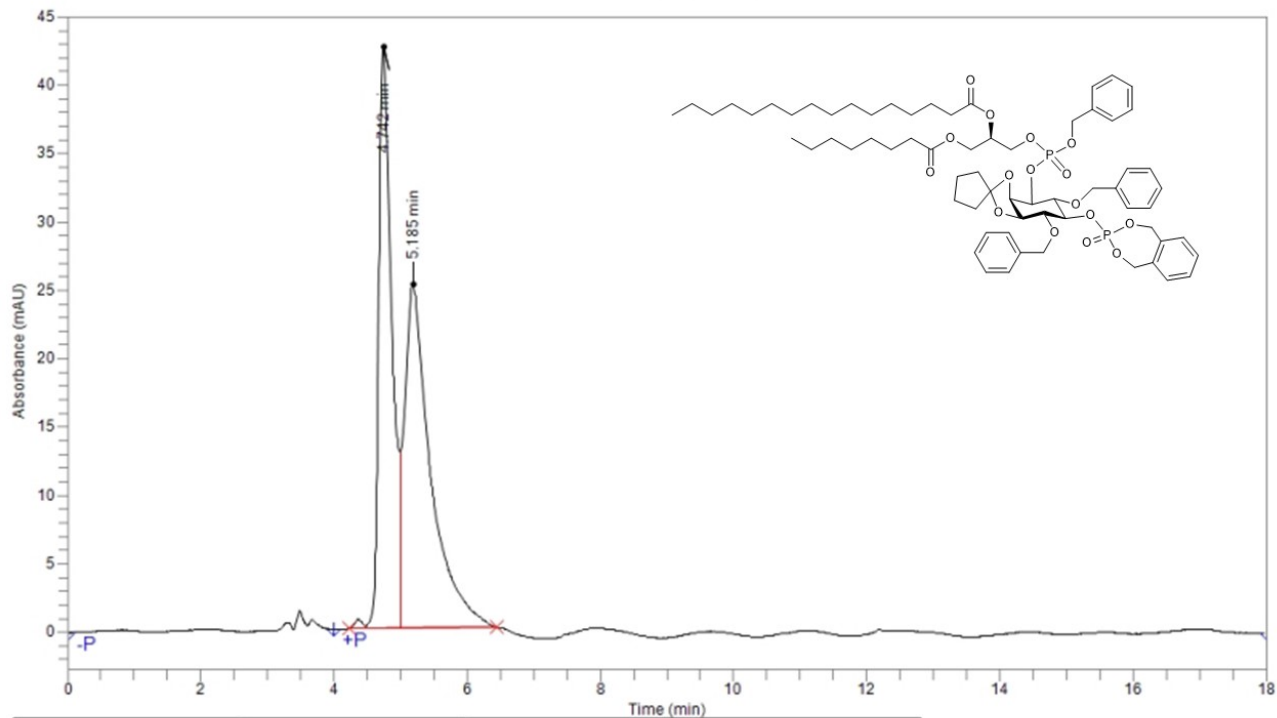

| Time         | Height   | Area        | Area % |
|--------------|----------|-------------|--------|
| 4.362        | 691.6    | 5,588.2     | 0.44   |
| 4.742        | 42,578.5 | 568,610.9   | 44.87  |
| 5.185        | 25,163.5 | 693,050.8   | 54.69  |
| <b>Total</b> |          | 1,267,249.9 | 100.00 |

(+)-(6R)-3-((3aR,4S,5R,6S,7R,7aR)-5,7-bis(benzyloxy)-6-[(3-oxo-1,5-dihydro-3H-2,4,3λ5-benzodioxaphosphepin-3-yl)oxy]hexahydrospiro[1,3-benzodioxole-2,1'-cyclopentan]-4-yl)oxy)-3,9-dioxo-1-phenyl-2,4,8-trioxa-3λ5-phosphahexadecan-6-yl hexadecanoate (+)-S19 HPLC 220 nm

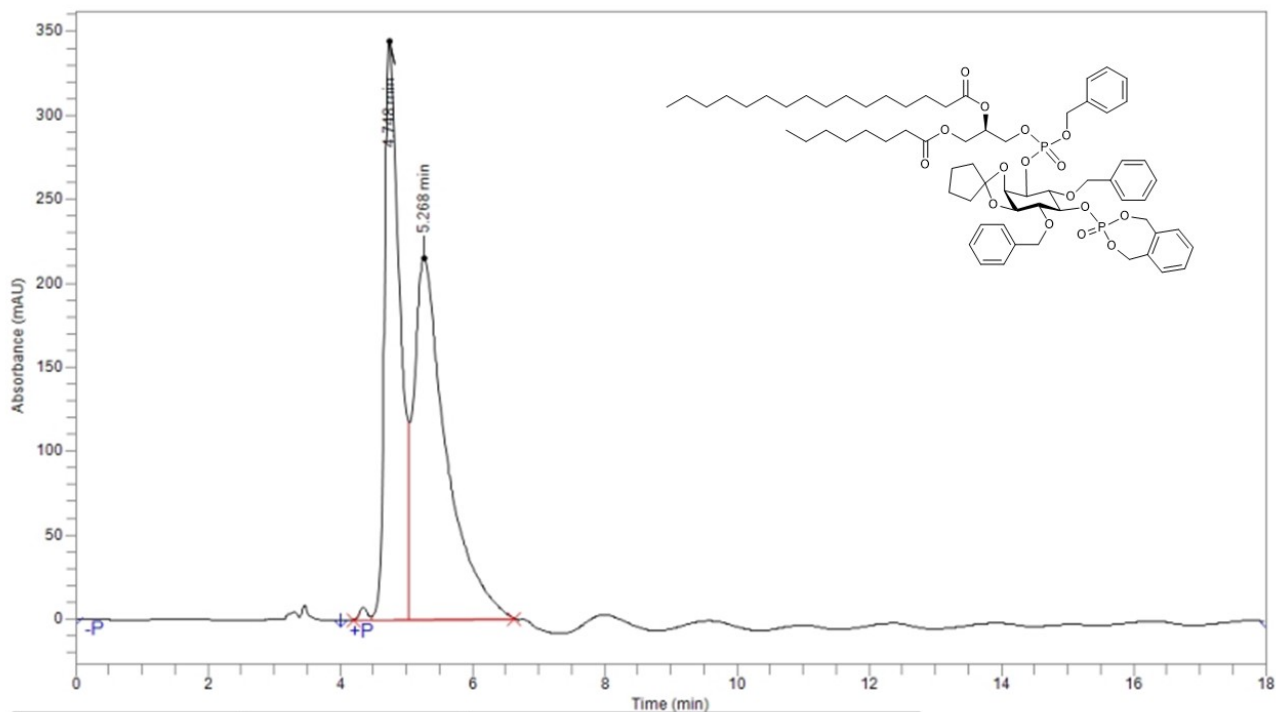

| Time         | Height    | Area         | Area % |
|--------------|-----------|--------------|--------|
| 4.347        | 7,433.2   | 57,182.2     | 0.44   |
| 4.748        | 344,882.0 | 5,605,897.8  | 43.22  |
| 5.268        | 215,370.0 | 7,308,067.4  | 56.34  |
| <b>Total</b> |           | 12,971,147.4 | 100.00 |

**(+)-(6R)-3-((3aR,4S,5R,6S,7R,7aR)-5,7-bis(benzyloxy)-6-[(3-oxo-1,5-dihydro-3H-2,4,3λ5-benzodioxaphosphepin-3-yl)oxy]hexahydrospiro[1,3-benzodioxole-2,1'-cyclopentan]-4-yl)oxy)-3,9-dioxo-1-phenyl-2,4,8-trioxa-3λ5-phosphahexadecan-6-yl hexadecanoate (+)-S19 HRMS**

Z:\data\2021\051 May\ESI87799.raw

05/05/2021 11:39 am

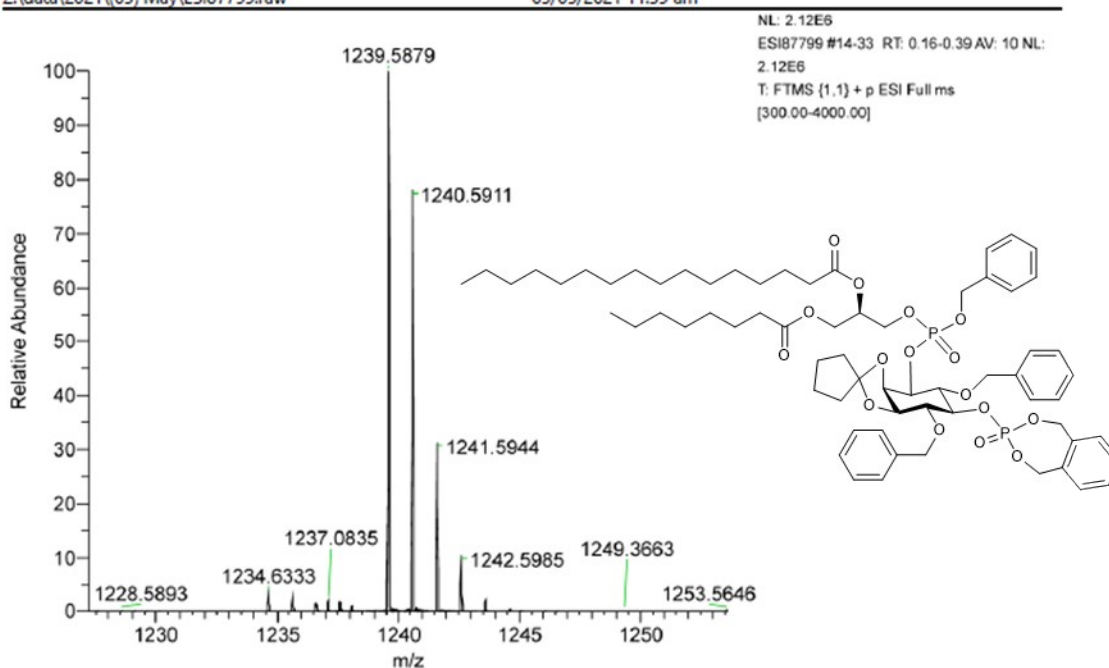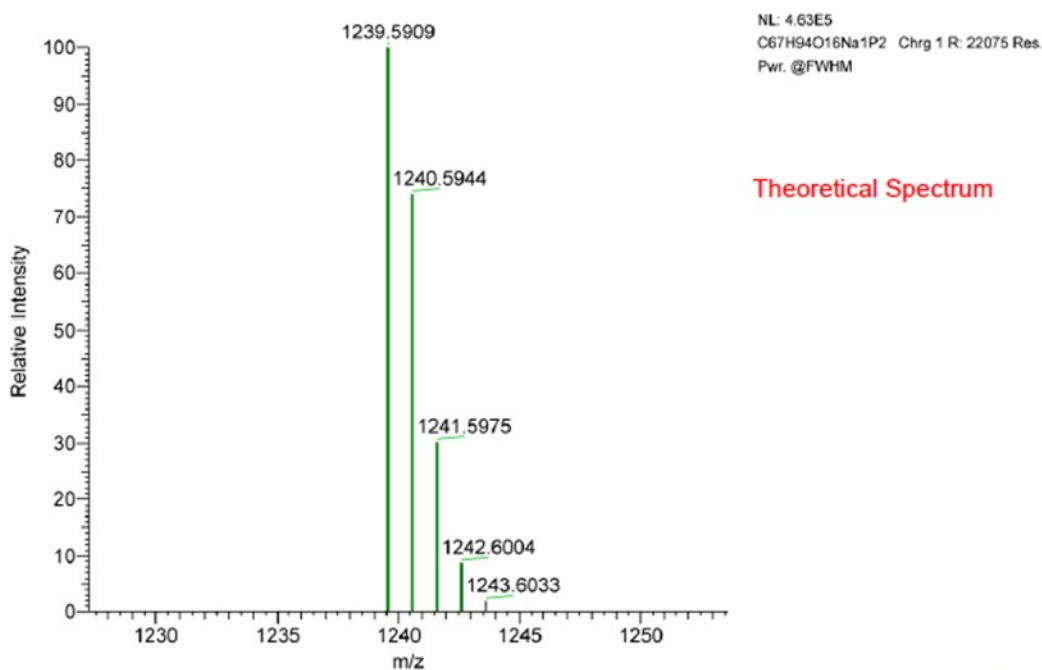

| Peak Mass Display... | Combin... | RDB    | Delta (p... | Theo. m... | Rank   | Combin... | # Match... | # Misse... | MS Cov... | Pattern... | MSMS... |         |
|----------------------|-----------|--------|-------------|------------|--------|-----------|------------|------------|-----------|------------|---------|---------|
| 1239.5               | C...      | 67.931 | 21.50       | -2.46      | 1239.5 | 1         | 94.892     | 6          | 0         | 96.390     | 100     | ICollor |

(+)-(2R)-3-[(hydroxy[[[(1R,2R,3R,4R,5S,6R)-2,3,4,6-tetrahydroxy-5-(phosphonooxy)cyclohexyl]oxy}phosphoryl]oxy]-2-(octanoyloxy)propyl hexadecanoate (+)-7 <sup>1</sup>H NMR

Current Data Parameters  
 NAME gb624001006 (C16-C8 PI5P)  
 EXPNO 1  
 PROCNO 1

F2 - Acquisition Parameters  
 Date\_ 20210610  
 Time 9.23 h  
 INSTRUM Avance  
 PROBHD Z159656\_0020 (PULPROG zg30)  
 TD 65536  
 SOLVENT MeOD  
 NS 16  
 DS 2  
 SWH 11904.762 Hz  
 FIDRES 0.363304 Hz  
 AQ 2.7525120 sec  
 RG 89.2706  
 DW 42.000 usec  
 DE 22.00 usec  
 TE 298.0 K  
 D1 1.00000000 sec  
 TD0 1  
 SFO1 600.4230021 MHz  
 NUC1 1H  
 P0 4.00 usec  
 P1 12.00 usec  
 PLW1 13.51200008 W

F2 - Processing parameters  
 SI 65536  
 SF 600.4200117 MHz  
 WDW EM  
 SSB 0  
 LB 0.30 Hz  
 GB 0  
 PC 1.00

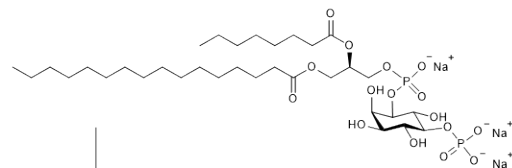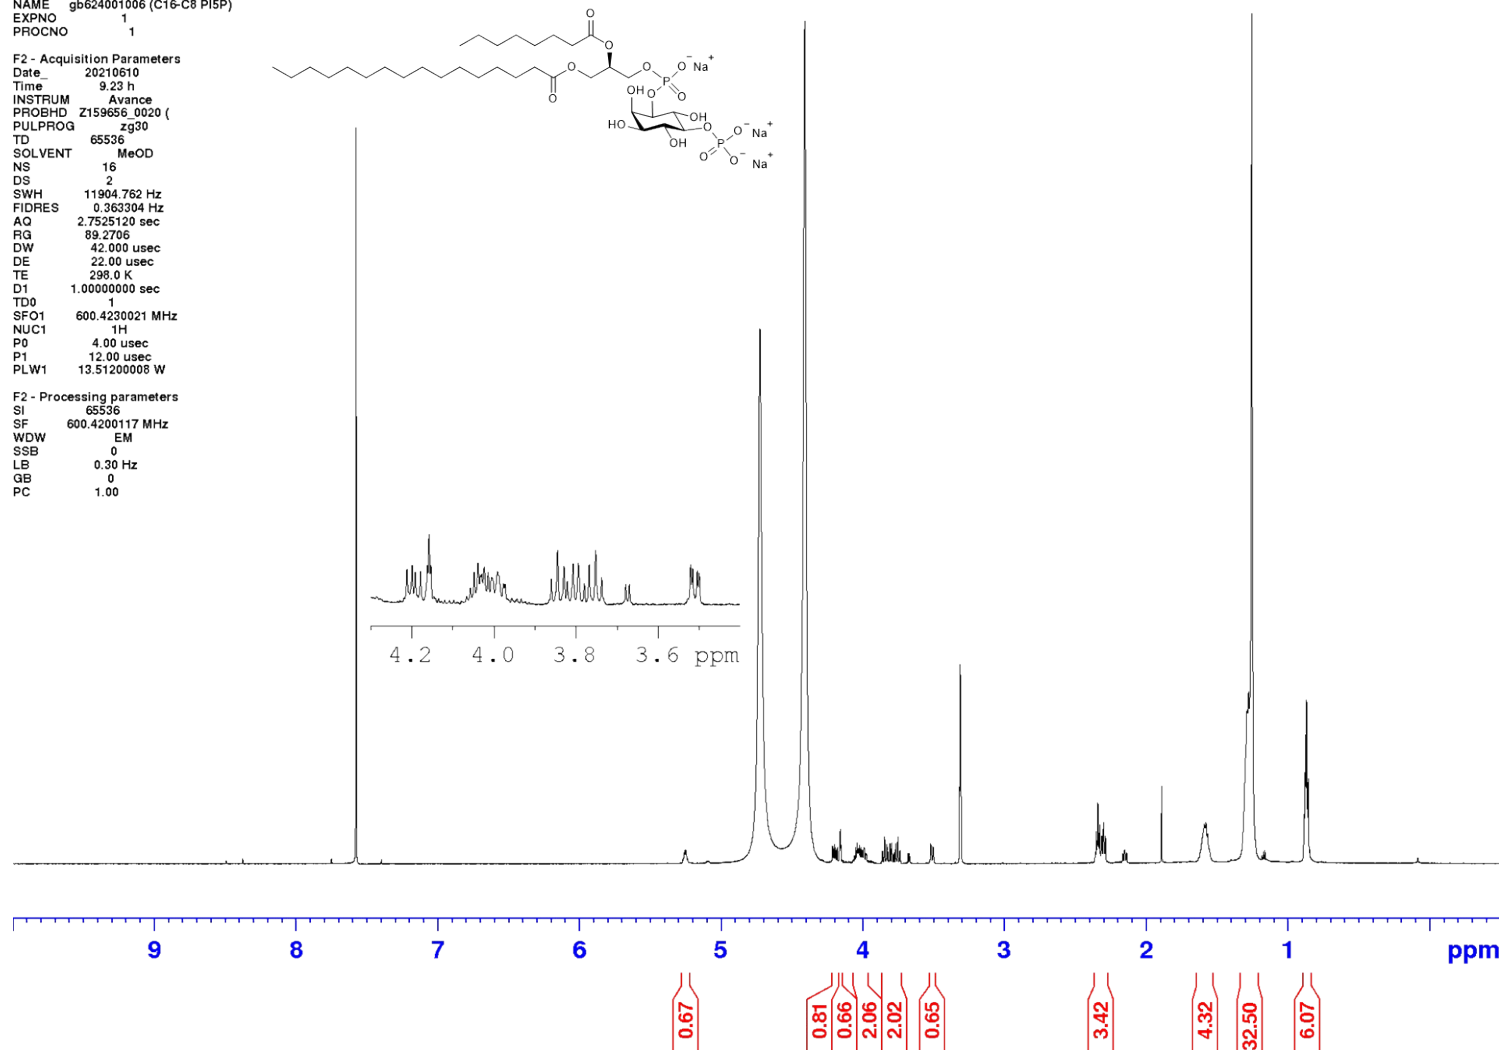

(+)-(2R)-3-[(hydroxy[[[(1R,2R,3R,4R,5S,6R)-2,3,4,6-tetrahydroxy-5-(phosphonoxy)cyclohexyl]oxy}phosphoryl]oxy]-2-(octanoyloxy)propyl hexadecanoate (+)-7 <sup>31</sup>P NMR

Current Data Parameters  
 NAME g9624001006 (C16-C8 P1SP)  
 EKFN0 2  
 PROCNO 1

F2 - Acquisition Parameters  
 Date\_ 20210610  
 Time 9.25 h  
 INSTRUM Avance  
 PROBHD Z199656\_002D ( (   
 PULPROG zgpg30  
 TD 65536  
 SOLVENT MeOD  
 NS 16  
 DS 4  
 SWH 48543.688 Hz  
 FIDRES 1.481436 Hz  
 AQ 0.6750208 sec  
 RG 101  
 DW 10.300 usec  
 DE 18.00 usec  
 TE 298.0 K  
 D1 2.0000000 sec  
 D11 0.03000000 sec  
 TD0 1  
 SFO1 243.0423184 MHz  
 NUC1 <sup>31</sup>P  
 PD 4.00 usec  
 P1 12.00 usec  
 PL1 39.40800000 W  
 SFO2 600.4224017 MHz  
 NUC2 <sup>1</sup>H  
 CDEPRG(2) malt16  
 PCPD2 80.00 usec  
 PLM2 13.51200008 W  
 PLM12 0.20124050 W  
 PLM13 0.13098180 W

F2 - Processing parameters  
 SI 22768  
 SF 243.0544711 MHz  
 MEW EM  
 SSB 0  
 LB 1.00 Hz  
 GB 0  
 PC 1.40

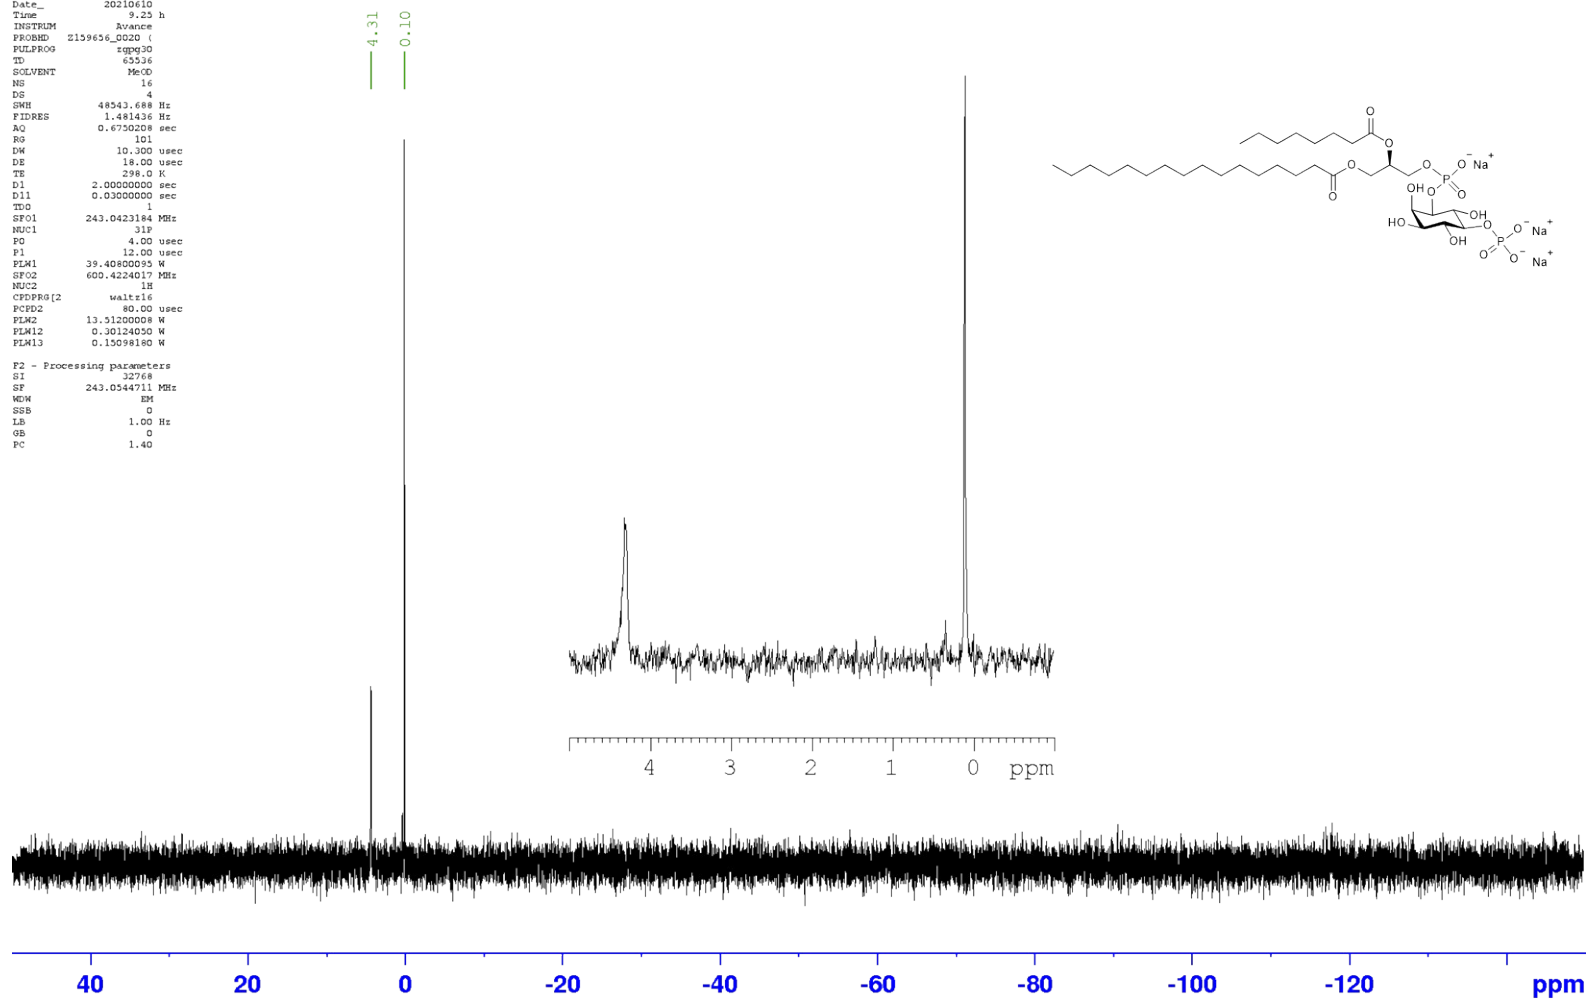

(+)-(2R)-3-[(hydroxy[[[(1R,2R,3R,4R,5S,6R)-2,3,4,6-tetrahydroxy-5-(phosphonoxy)cyclohexyl]oxy}phosphoryl]oxy]-2-(octanoyloxy)propyl hexadecanoate (+)-7 <sup>13</sup>C NMR

```

Current Data Parameters
NAME      gbc2400106 (c16-C8 P15P)
EXPNO    4
PROCNO   1

F2 - Acquisition Parameters
Date_    20210610
Time     12.48 h
INSTRUM  Avance
PROBHD   ZL59656_0020 (
PULPROG  zgpg30
TD       65536
SOLVENT  MeOD
NS       3072
DS       4
SWH      35714.285 Hz
FIDRES   1.089913 Hz
AQ       0.9175040 sec
RG       101
DM       14.000 usec
DE       18.00 usec
TE       298.0 K
D1       2.0000000 sec
D11      0.0300000 sec
TD0      1
SFO1     150.9908267 MHz
NUC1     13C
PD       3.33 usec
P1       10.00 usec
PLM1     41.91400146 W
SFO2     600.4224017 MHz
NUC2     1H
CPCPRG2  waltz16
PCPD2    80.00 usec
PLW2     13.51200008 W
PLW12    0.30124050 W
PLW13    0.15058180 W

F2 - Processing parameters
SI       32768
SF       150.9756068 MHz
WDW      EM
SSB      0
LB       2.00 Hz
GB       0
PC       1.40
    
```

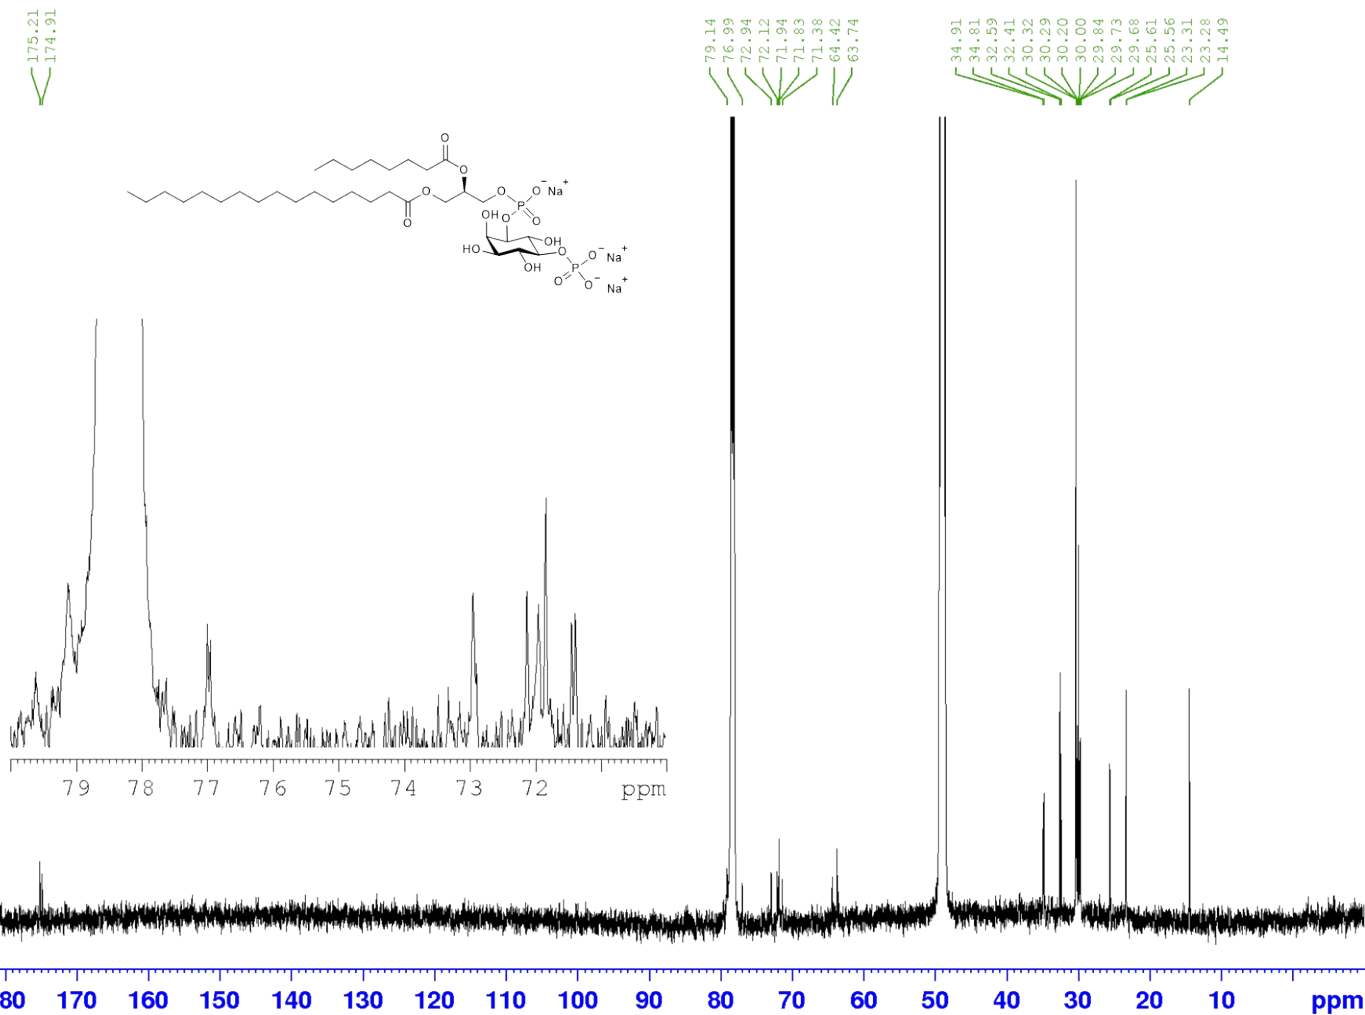

(+)-(2R)-3-[(hydroxy[[[(1R,2R,3R,4R,5S,6R)-2,3,4,6-tetrahydroxy-5-(phosphonooxy)cyclohexyl]oxy}phosphoryl]oxy]-2-(octanoyloxy)propyl hexadecanoate (+)-7 <sup>1</sup>H to <sup>13</sup>C HSQC NMR

Current Data Parameters  
 NAME gb624001006 (C16-C8 PISP)  
 EXPNO 9  
 PROCNO 1

F2 - Acquisition Parameters  
 Date\_ 20210810  
 Time\_ 13:29 h  
 INSTRUM Avance  
 PROBHD Z150000000 (C16-C8 PISP)  
 PULPROG hsqc2d16  
 TD 2048  
 SOLVENT MeOD

NS 8  
 DS 32  
 SWH 7142.857 Hz  
 FIDRES 0.1433600 usec  
 AQ 0.1433600 usec  
 RG 101  
 DW 70.000 usec  
 DE 22.000 usec  
 TE 289.0 K  
 CNST2 145.0000000  
 D0 0.0000000 usec  
 D1 1.0000000 usec  
 D4 0.00172414 usec  
 D11 0.03000000 usec  
 D19 0.00010000 usec  
 D21 0.00380000 usec  
 INO 0.0000000 usec  
 TDAV 1

ZGPGTNS  
 SFO1 600.4228220 MHz  
 NUC1 1H  
 P1 12.00 usec  
 P2 24.00 usec  
 PLW1 13.51200008 W  
 SFO2 150.8752071 MHz  
 NUC2 13C  
 CPDPRG2 garp  
 P3 10.00 usec  
 P14 500.00 usec  
 P31 1730.00 usec  
 RC PD2 55.00 usec  
 PLW0 0 W  
 PLW2 41.01400149 W  
 PLW12 1.35538887 W  
 SPNA M[3] C rp80,0.5,20.1  
 SFOAL3 0.300  
 SROFFS3 0 Hz  
 SPW3 6.40300081 W  
 SPNA M[18] C rp80,0.5,20.1  
 SFOAL18 0.300  
 SROFFS18 0 Hz  
 SPW18 1.35538887 W  
 GPNA M[1] SMSQ10,100  
 GPZ1 20.10 %  
 GPNA M[2] SMSQ10,100  
 GPZ2 20.10 %  
 P16 1000.00 usec

===== F1 INDIRECT DIMENSION =====  
 td1 259  
 sw\_f1 164.868332

F1 - Acquisition parameters  
 TD 259  
 SFO1 150.8752071 MHz  
 FIDRES 0.1433600 usec  
 SW 165.000 ppp  
 FMODE Echo-Antiecho

F2 - Processing parameters  
 SI 1024  
 SF 600.4200000 MHz  
 WDW COSINE  
 SSB 2  
 LB 0 Hz  
 GB 0  
 RC 1.40

F1 - Processing parameters  
 SI 1024  
 MC2 echo-antiecho  
 SF 150.8752071 MHz  
 WDW COSINE  
 SSB 2  
 LB 0 Hz  
 GB 0

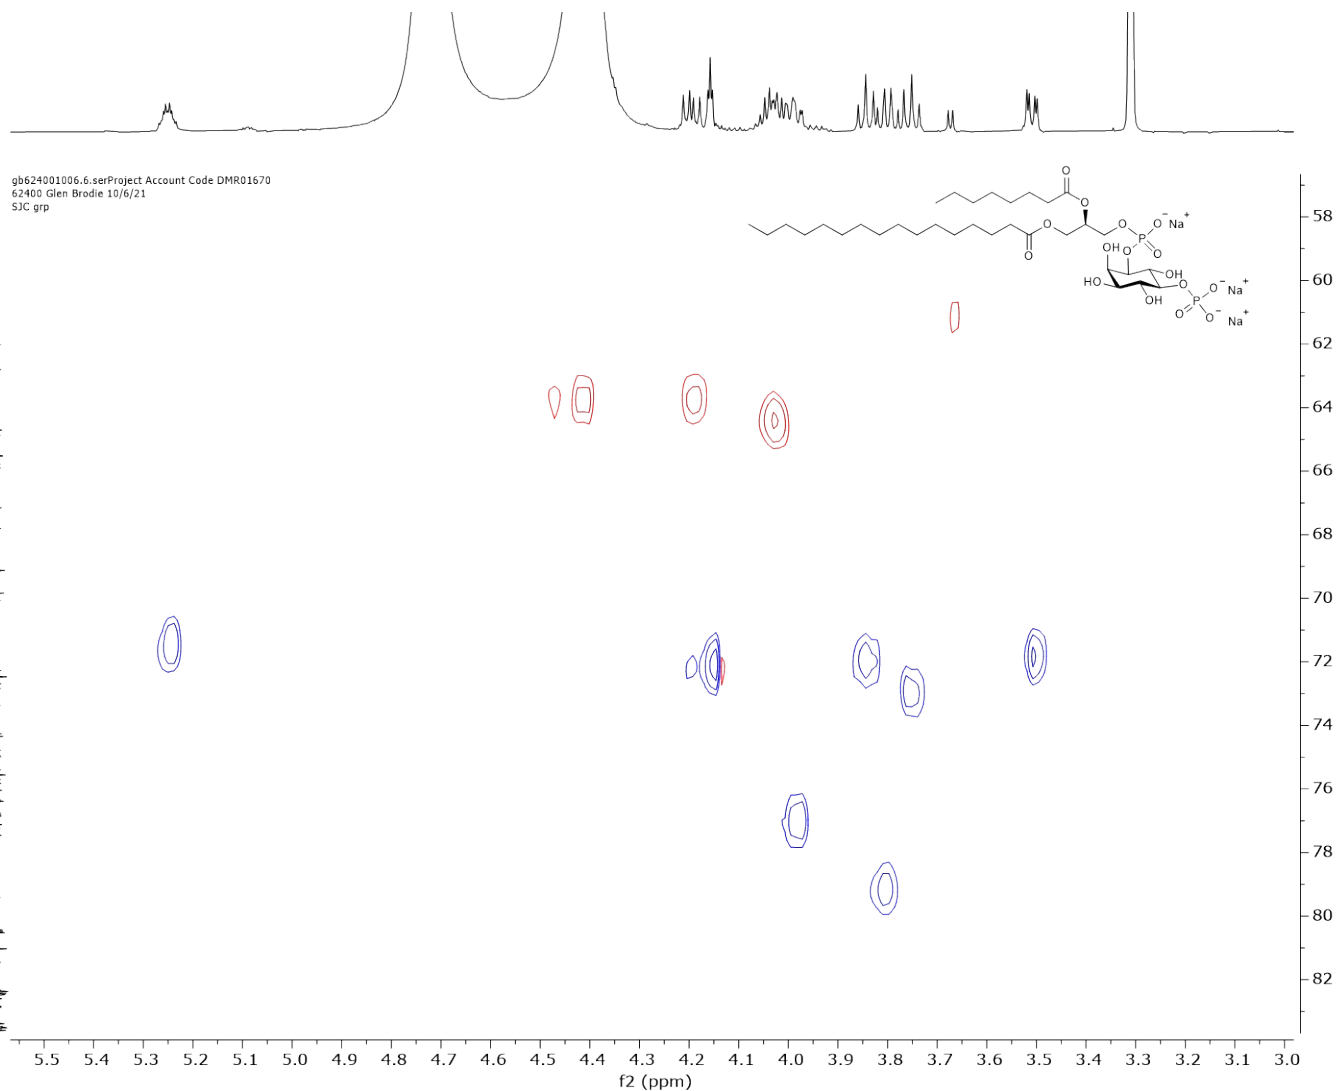

**(+)-(2R)-3-[(hydroxy{[(1R,2R,3R,4R,5S,6R)-2,3,4,6-tetrahydroxy-5-(phosphonoxy)cyclohexyl]oxy}phosphoryl)oxy]-2-(octanoyloxy)propyl hexadecanoate (+)-7 HRMS**

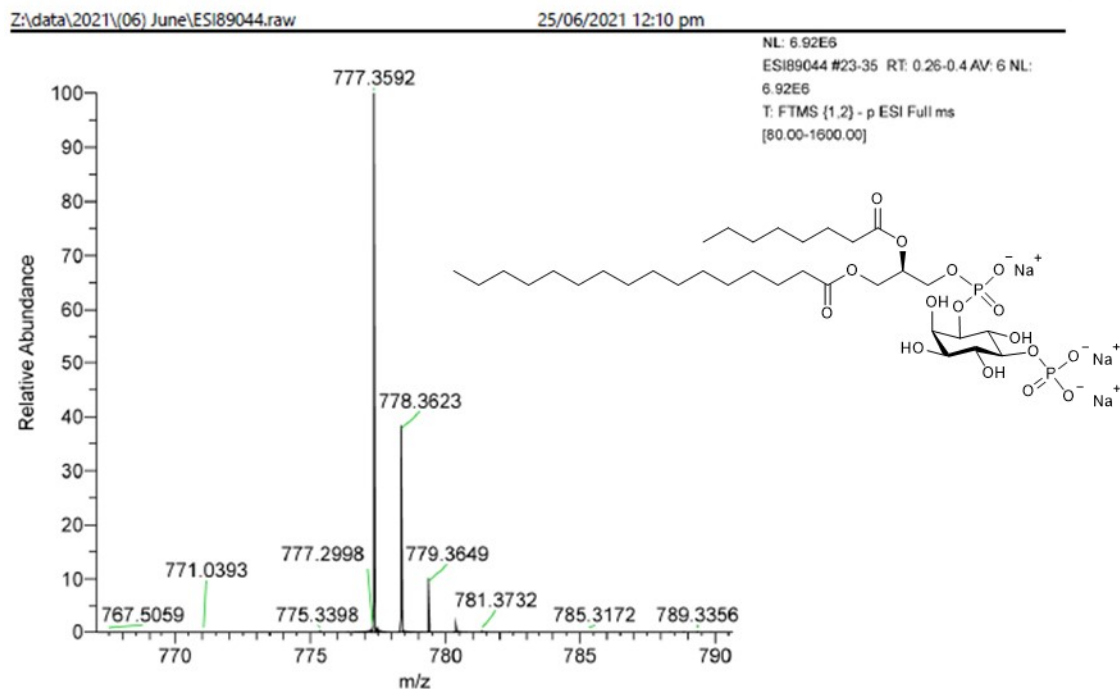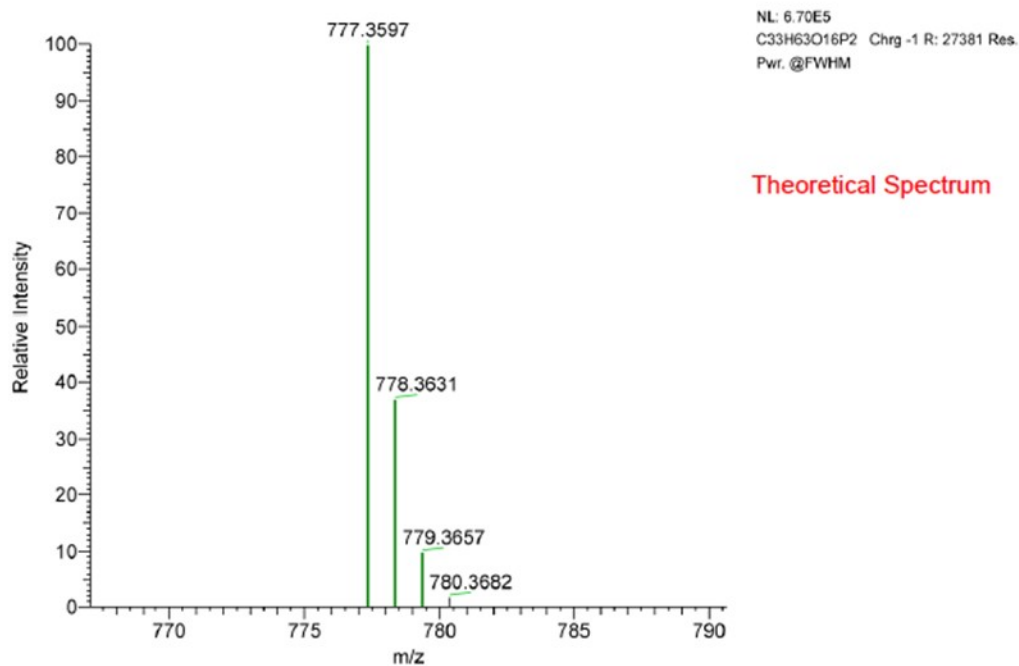

| Peak Mass Display... | Combin... | RDB    | Delta [p... | Theo. m... | Rank   | Combin... | # Match... | # Misse... | MS Cov... | Pattern... | MSMS... |         |
|----------------------|-----------|--------|-------------|------------|--------|-----------|------------|------------|-----------|------------|---------|---------|
| 777.3592             | C...H...  | 43.254 | 3.50        | -0.61      | 777.35 | 1         | 92.963     | 5          | 0         | 95.724     | 99.793  | /Collar |

(2R)-1-[(hydroxy{[(1R,2R,3R,4R,5S,6R)-2,3,4,6-tetrahydroxy-5-(phosphonoxy)cyclohexyl]oxy}phosphoryl)oxy]-3-(octanoyloxy)propan-2-yl hexadecanoate (+)-8 <sup>1</sup>H NMR

Current Data Parameters  
 NAME gb624011506 (C8-C16 PI5P)  
 EXPNO 1  
 PROCNO 1

F2 - Acquisition Parameters  
 Date 20210615  
 Time 9.21 h  
 INSTRUM Avance  
 PROBHD Z159656\_0020 (zq30)  
 PULPROG zg30  
 TD 65536  
 SOLVENT MeOD  
 NS 16  
 DS 2  
 SWH 11904.762 Hz  
 FIDRES 0.363304 Hz  
 AQ 2.7525120 sec  
 RG 85.5505  
 DW 42.000 usec  
 DE 22.00 usec  
 TE 298.0 K  
 D1 1.00000000 sec  
 TD0 1  
 SFO1 600.4230021 MHz  
 NUC1 <sup>1</sup>H  
 P0 4.00 usec  
 P1 12.00 usec  
 PLW1 13.51200008 W

F2 - Processing parameters  
 SI 65536  
 SF 600.4200119 MHz  
 WDW EM  
 SSB 0  
 LB 0.30 Hz  
 GB 0  
 PC 1.00

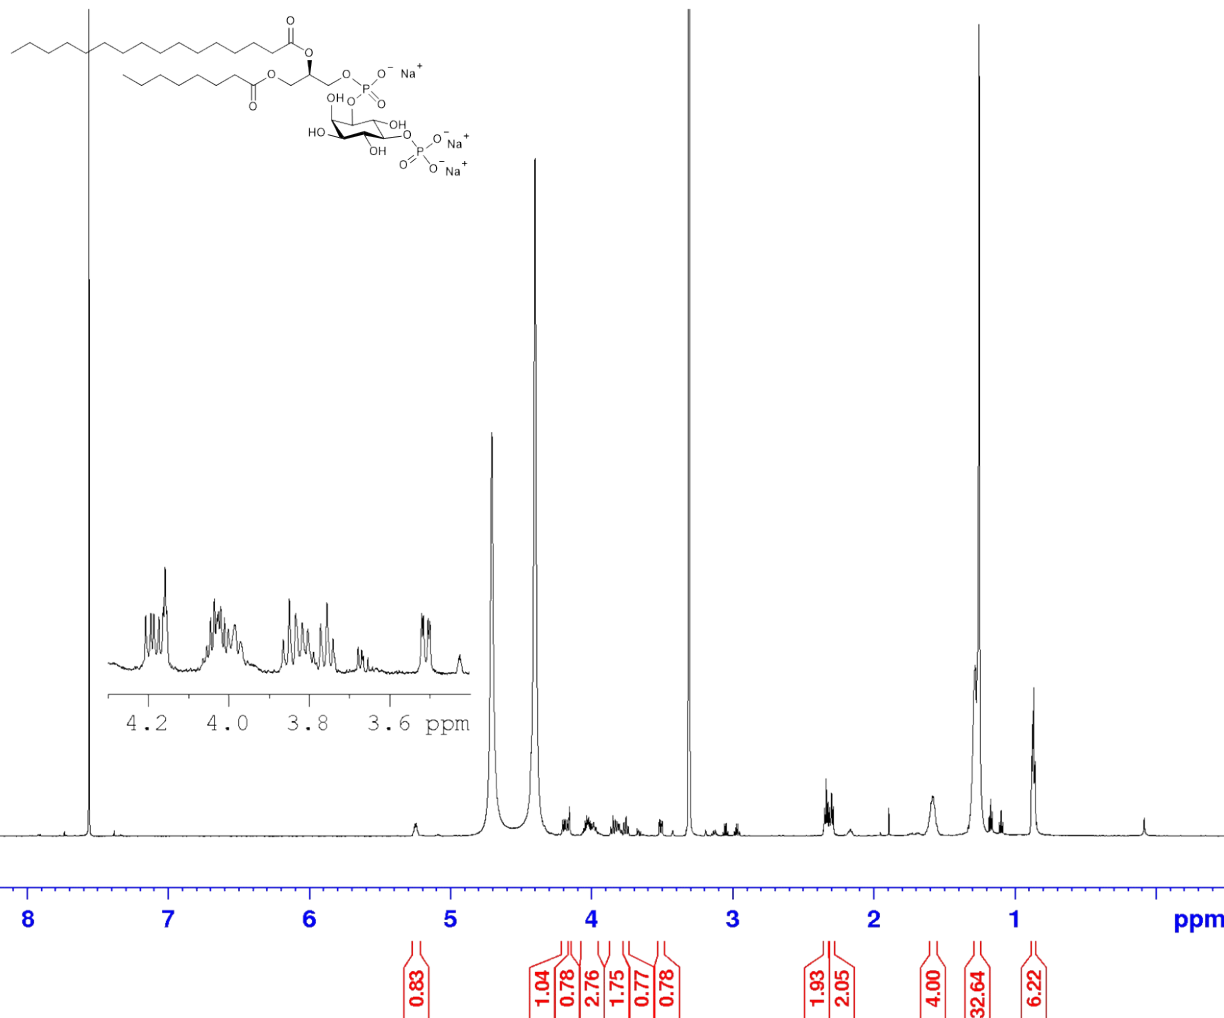

**(2R)-1-[(hydroxy{[(1R,2R,3R,4R,5S,6R)-2,3,4,6-tetrahydroxy-5-(phosphonoxy)cyclohexyl]oxy}phosphoryl)oxy]-3-(octanoyloxy)propan-2-yl hexadecanoate (+)-8 <sup>31</sup>P NMR**

Current Data Parameters  
 NAME gpc24011506 (C8-C16 P15P)  
 EXPNO 2  
 PROCNO 1

F2 - Acquisition Parameters  
 Date\_ 20210615  
 Time 9.45 h  
 INSTRUM Avance  
 PROBHD z159e56\_0020 (zpgpg30)  
 PULPROG zgpg30  
 TD 65536  
 SOLVENT MeCO  
 NS 512  
 DS 4  
 SWE 48543.688 Hz  
 FIDRES 1.481436 Hz  
 AQ 0.6750208 sec  
 RG 101  
 DM 10.300 usec  
 DE 18.00 usec  
 TE 298.0 K  
 D1 2.0000000 sec  
 D11 0.0300000 sec  
 TD0 1  
 SFO1 243.0423184 MHz  
 NUC1 31P  
 FO 4.00 usec  
 F1 12.00 usec  
 PLM1 39.4080000 W  
 SFO2 600.4224017 MHz  
 NUC2 1H  
 CFCF2P2 waltz16  
 PFCF2 80.00 usec  
 PLM2 13.5120000 W  
 PLM12 0.30124050 W  
 PLM13 0.15058180 W

F2 - Processing Parameters  
 SI 32768  
 SF 243.0544711 MHz  
 MDW no  
 SSB 0  
 LB 0 Hz  
 GB 0  
 PC 1.40

3.72  
0.07

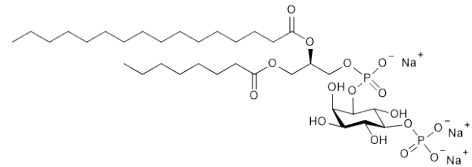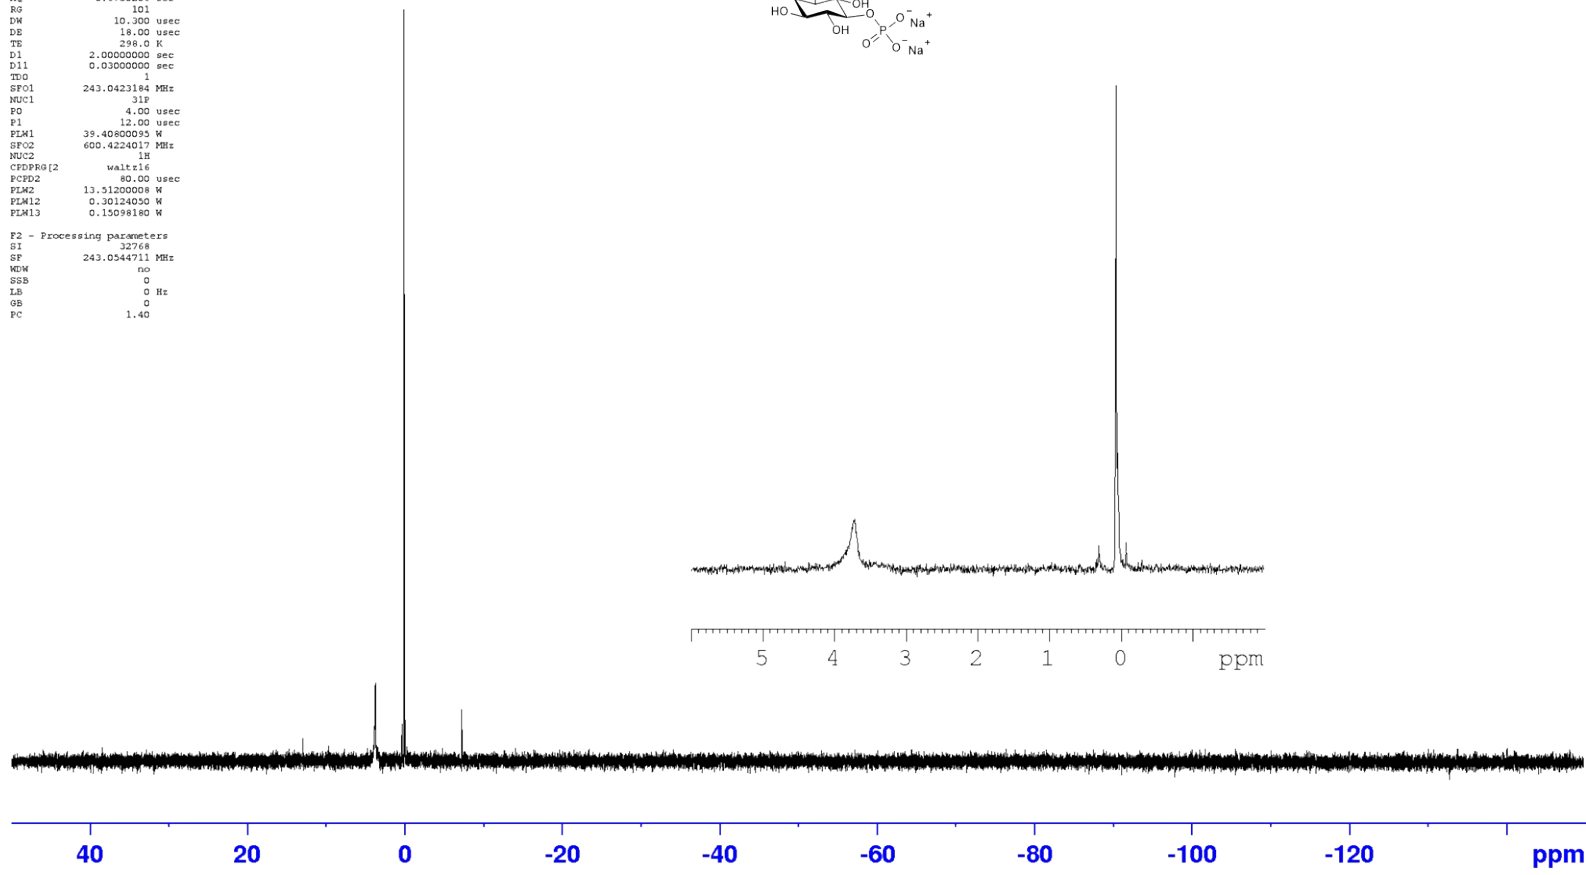

(2R)-1-[(hydroxy{[(1R,2R,3R,4R,5S,6R)-2,3,4,6-tetrahydroxy-5-(phosphonoxy)cyclohexyl]oxy}phosphoryl)oxy]-3-(octanoyloxy)propan-2-yl hexadecanoate (+)-8 <sup>13</sup>C NMR

Current Data Parameters  
 NAME gb24011506 (c8-c16 P15P)  
 EXPNO 4  
 PROCNO 1

F2 - Acquisition Parameters  
 Date\_ 20210615  
 Time 13.43 h  
 INSTRUM Brance  
 PROBHD E159656\_0020 (zpg30)  
 PULPROG zgpg30  
 TD 65536  
 SOLVENT MeD2  
 NS 4096  
 DS 4  
 SWH 35714.289 Hz  
 FIDRES 1.089913 Hz  
 AQ 0.9175040 sec  
 RG 101  
 DW 14.000 usec  
 DE 18.00 usec  
 TE 298.0 K  
 D1 2.0000000 sec  
 D11 0.0300000 sec  
 TD0 1  
 SFO1 150.9908267 MHz  
 NUC1 13C  
 PO 3.33 usec  
 P1 10.00 usec  
 PLM1 41.91400146 W  
 SFO2 600.4224017 MHz  
 NUC2 1H  
 CDFPR2 Waltz16  
 PCPD2 80.00 usec  
 PLM2 13.51200008 W  
 PLM12 0.30124050 W  
 PLM13 0.15098180 W

F2 - Processing parameters  
 SI 85536  
 SF 150.9756112 MHz  
 MDW EM  
 SSB 0  
 LB 2.00 Hz  
 GB 0  
 PC 1.40

175.18  
174.91

76.95  
72.91  
72.09  
71.92  
71.79  
71.54  
64.38  
63.73

34.92  
34.78  
32.57  
32.36  
30.34  
30.32  
30.28  
30.24  
30.07  
29.98  
29.79  
29.75  
29.62  
25.83  
25.51  
23.50  
23.25  
14.50  
14.47

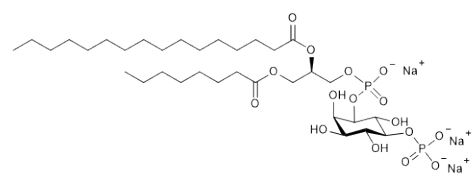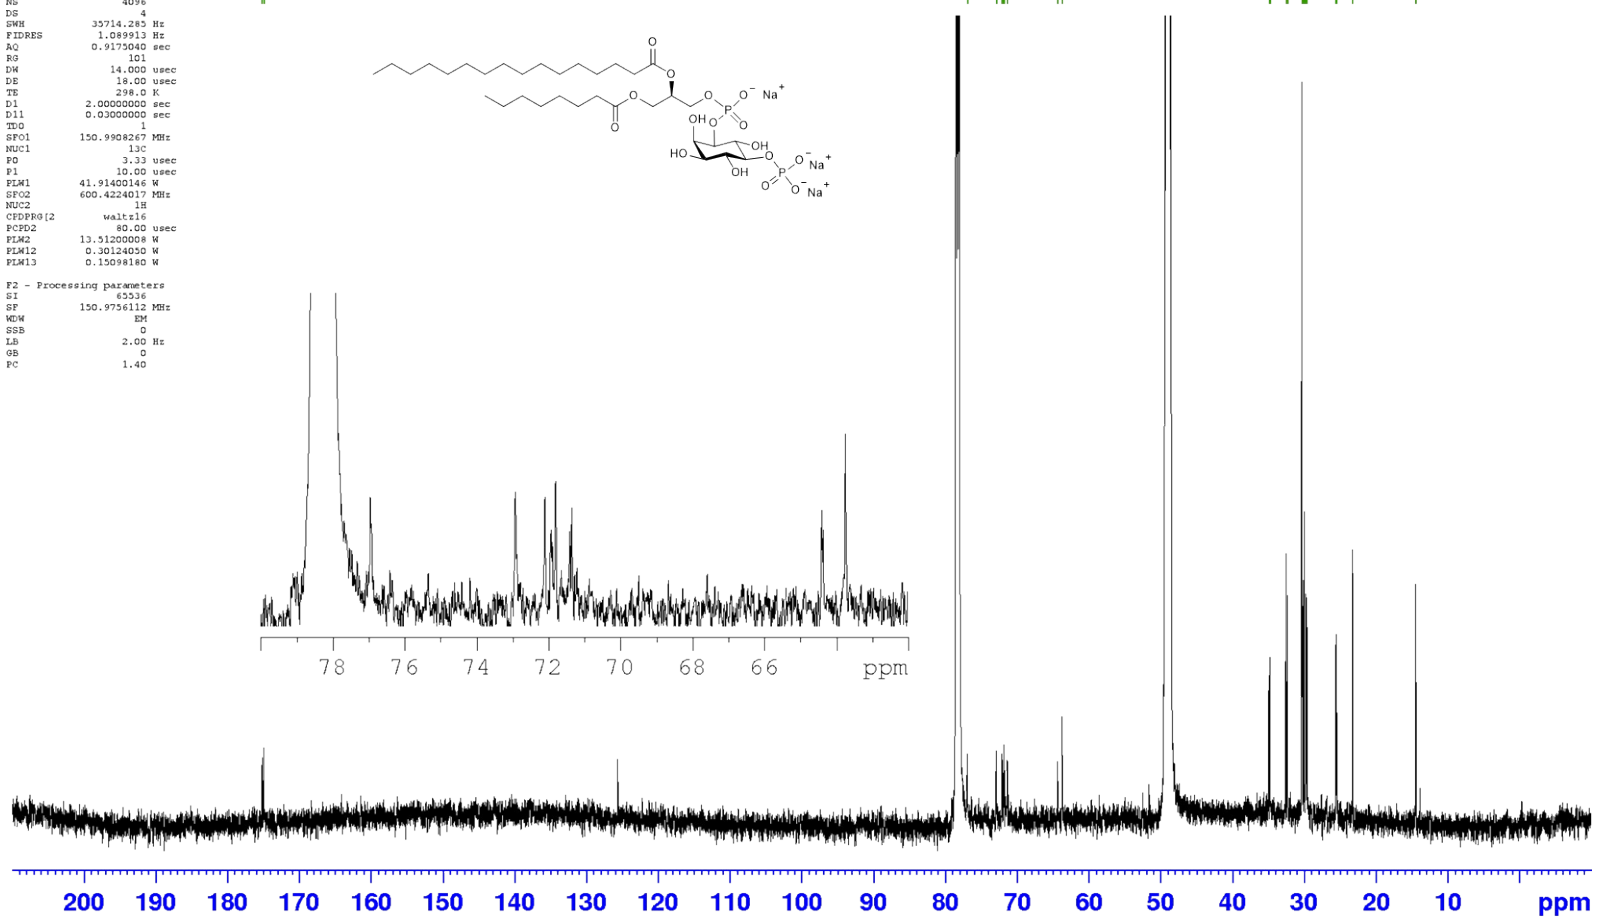

**(2R)-1-[(hydroxy{[(1R,2R,3R,4R,5S,6R)-2,3,4,6-tetrahydroxy-5-(phosphonoxy)cyclohexyl]oxy}phosphoryl)oxy]-3-(octanoyloxy)propan-2-yl hexadecanoate (+)-8 <sup>1</sup>H to <sup>13</sup>C HSQC NMR**

Current Data Parameters  
 NAME gb624011506 (C3-C18 PISP)  
 EXPNO 9  
 PROCNO 1

F2 - Acquisition Parameters  
 Date\_ 20210815  
 Time\_ 18.37 h  
 INSTRUM Avance  
 PROBHD Z130P30 2020 (1  
 PULPROG hsqcedtq.psp.3  
 TD 2048

SOLVENT MeOD  
 NS 32  
 DS 16  
 SWH 7142.857 Hz  
 FIDRES 0.875448 Hz  
 AQ 0.143390 sec  
 RG 101  
 DW 70.000 usec  
 DE 22.000 usec  
 TE 289.0 K  
 CNST2 145.000000  
 D0 0.0000300 sec  
 D1 1.0000000 sec  
 D4 0.0017244 sec  
 D11 0.0300000 sec  
 D18 0.0001000 sec  
 D21 0.0038000 sec  
 INO 0.0003309 sec

TDav 1  
 ZGPGTNS  
 SFO1 800.4230021 MHz  
 NUC1 1H  
 P1 12.00 usec  
 P2 24.00 usec  
 PLW1 13.5120000 W  
 SFO2 150.8752371 MHz  
 NUC2 13C  
 CPDPRG2 gamp  
 P3 10.00 usec  
 P14 500.00 usec  
 P31 1730.00 usec  
 PCPD2 55.00 usec  
 PLW0 0 W  
 PLW2 41.81400148 W  
 PLW12 1.38550087 W  
 SPNAM[3] C rp80.0.5.20.1  
 SPOAL3 0.500  
 SPROFFS3 0 Hz  
 SPW3 8.40300051 W  
 SPNAM[18] C rp80\_xfhit2  
 SPOAL18 0.500  
 SPROFFS18 0 Hz  
 SPW18 1.85000005 W  
 GPNAM[1] SIMSQ10.100  
 GPZ1 80.00 %  
 GPNAM[2] SIMSQ10.100  
 GPZ2 20.10 %  
 P18 1000.00 usec

===== F1 INDIRECT DIMENSION =====  
 td1 298  
 sw\_f1 164.86352

F1 - Acquisition parameters  
 TD 298  
 SFO1 150.87578 MHz  
 FIDRES 184.843417 Hz  
 SW 185.000 ppm  
 FaMODE Echo-Antiecho

F2 - Processing parameters  
 SI 2048  
 SF 800.4200000 MHz  
 WDW QSINE  
 SSB 2  
 LB 0 Hz  
 GB 0  
 PC 1.40

F1 - Processing parameters  
 SI 1024  
 MC2 echo-antiecho  
 SF 150.8752371 MHz  
 WDW QSINE  
 SSB 2  
 LB 0 Hz  
 GB 0

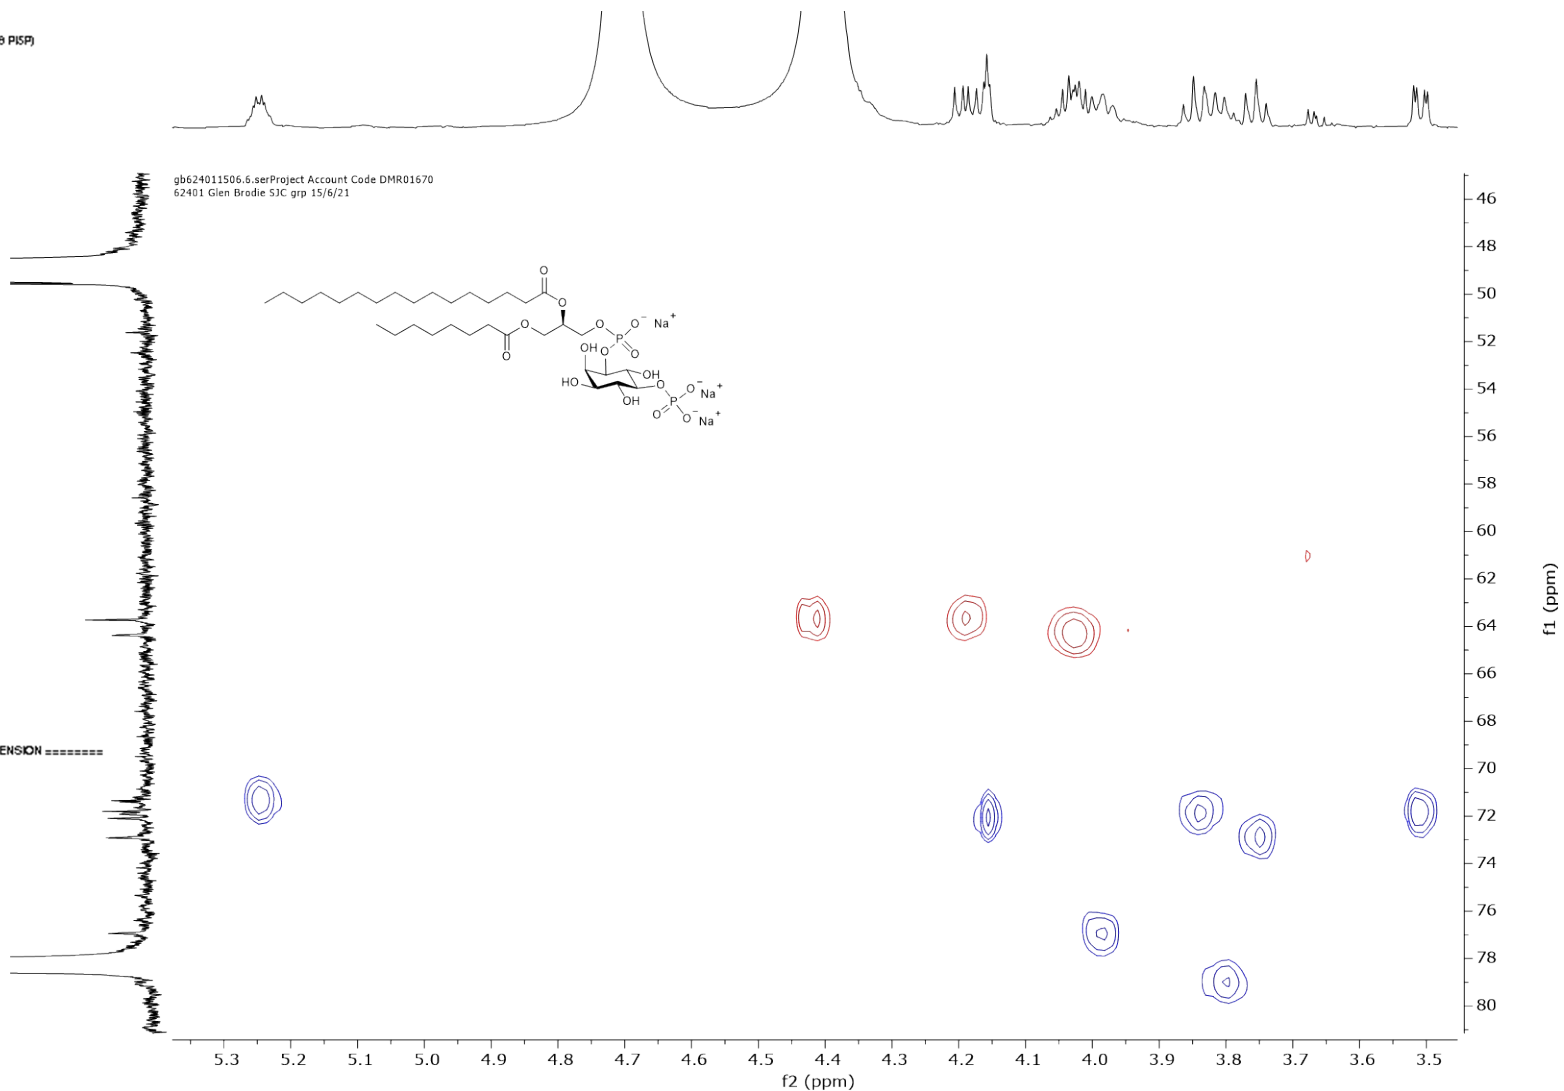

**(2R)-1-[(hydroxy{[(1R,2R,3R,4R,5S,6R)-2,3,4,6-tetrahydroxy-5-(phosphonoxy)cyclohexyl]oxy}phosphoryl)oxy]-3-(octanoyloxy)propan-2-yl hexadecanoate (+)-8 HRMS**

Z:\data\2021\051 May\ESI88421.raw

25/05/2021 3:37 pm

NL: 3.27E3  
 ESI88421 #14-27 RT: 0.16-0.32 AV: 7 NL:  
 2.92E5  
 T: FTMS (1.2) - p ESI Full ms  
 [80.00-1600.00]

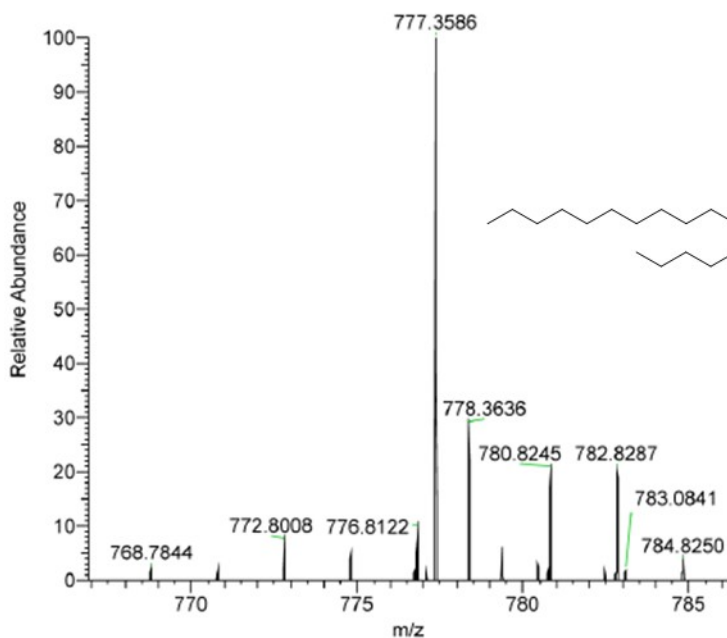

NL: 6.70E5  
 C33H63O16P2 Chrg -1 R: 27979 Res.  
 Pwr. @FWHM

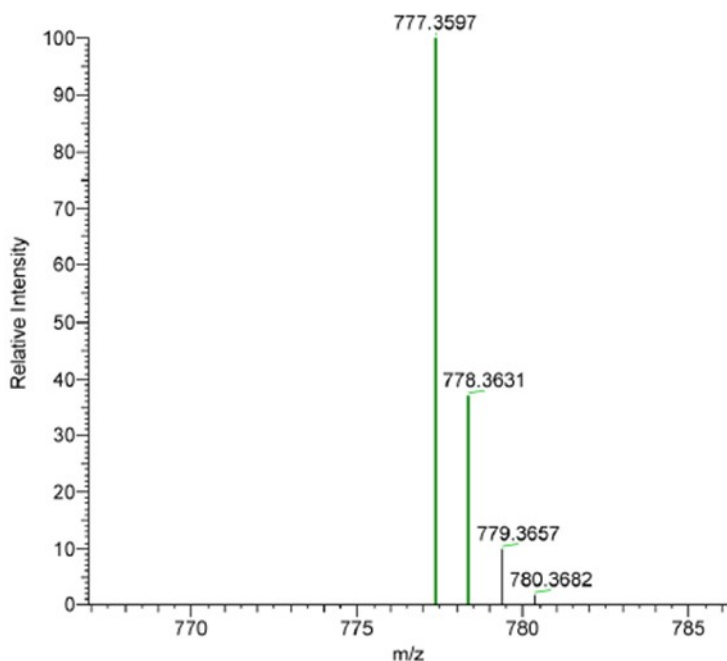

| Peak Mass Display... | Combin... | RDB | Delta (p... | Theo. m... | Rank | Combin... | # Match... | # Misse... | MS Cov... | Pattern... | MSMS... |
|----------------------|-----------|-----|-------------|------------|------|-----------|------------|------------|-----------|------------|---------|
|----------------------|-----------|-----|-------------|------------|------|-----------|------------|------------|-----------|------------|---------|

**(+)-(2R)-3-[[[(2S)-2-methoxy-2-phenylacetyl]oxy]-2-(octanoyloxy)propyl hexadecanoate (+)-S20 <sup>1</sup>H NMR**

Current Data Parameters  
NAME gb534271208 (C16, C-8 S MPA)  
EXPNO 1  
PROCNO 1

F2 - Acquisition Parameters  
Date\_ 20210813  
Time 16.56 h  
INSTRUM Avance  
PROBHD Z159856 0020 (PULPROG zg30  
TD 65536  
SOLVENT CDCl3  
NS 16  
DS 2  
SWH 11904.762 Hz  
FIDRES 0.363304 Hz  
AQ 2.7525120 sec  
RG 52.7314  
DW 42.900 usec  
DE 22.00 usec  
TE 298.0 K  
D1 1.00000000 sec  
TD0 1  
SFO1 600.4230021 MHz  
NUC1 1H  
P0 4.00 usec  
P1 12.00 usec  
PLW1 13.51200008 W

F2 - Processing parameters  
SI 65536  
SF 600.4200136 MHz  
WDW EM  
SSB 0  
LB 0.30 Hz  
GB 0  
PC 1.00

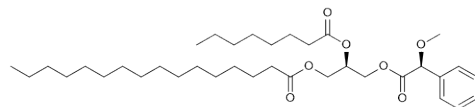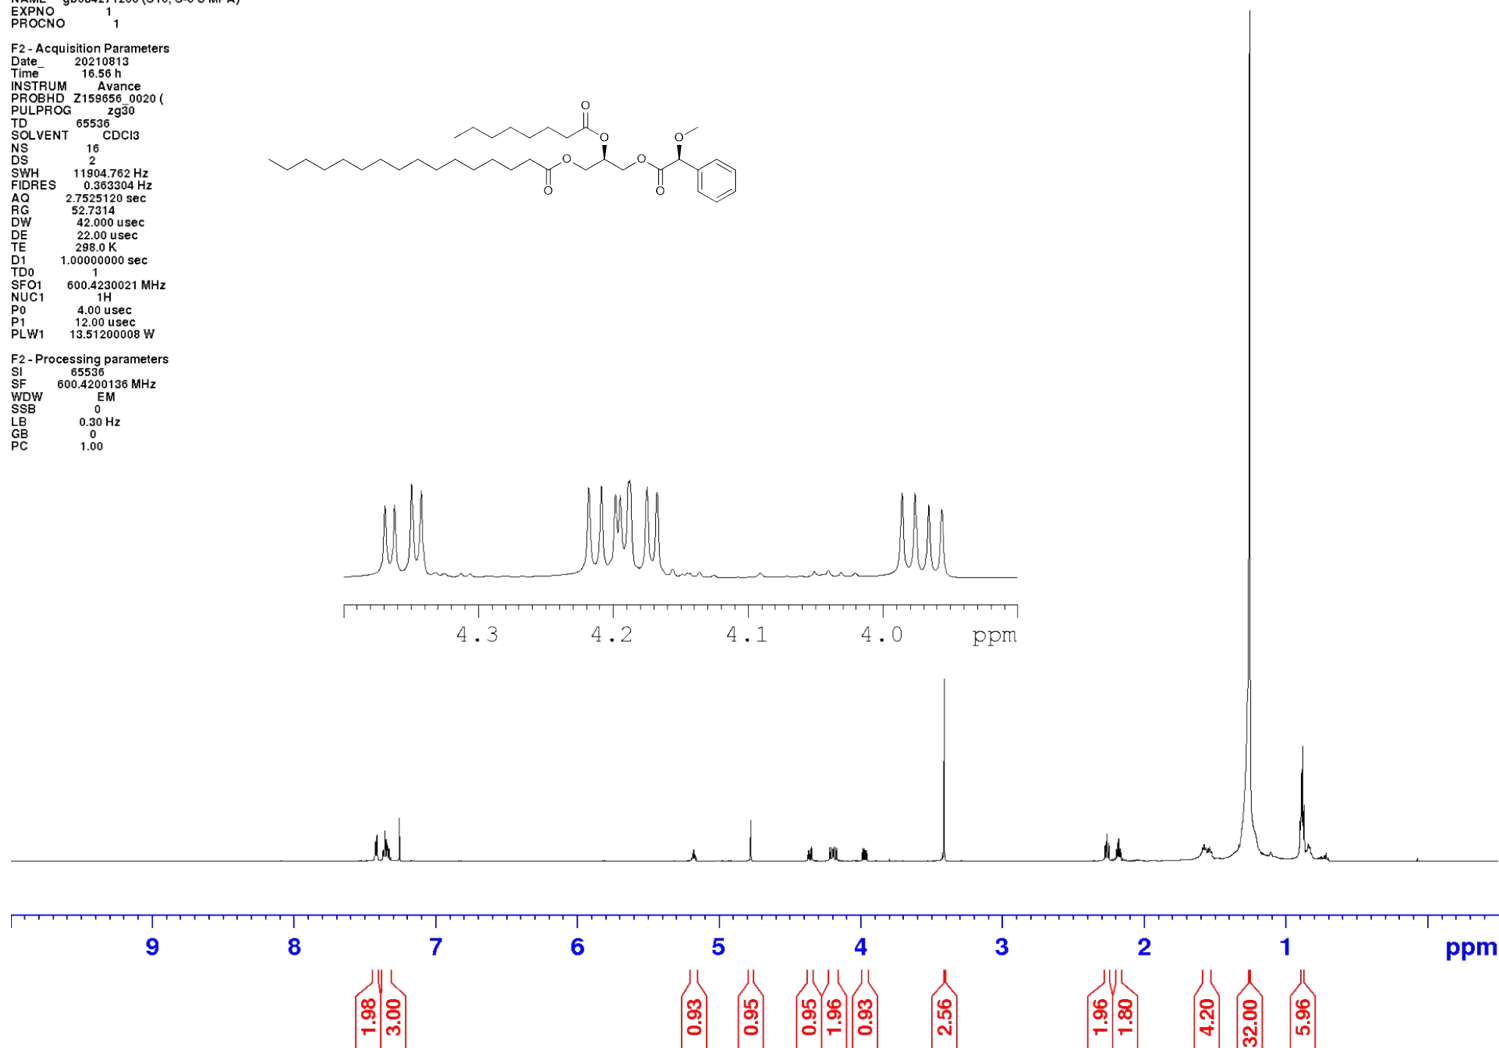

**(+)-(2R)-3-[[[(2S)-2-methoxy-2-phenylacetyl]oxy]-2-(octanoyloxy)propyl hexadecanoate (+)-S20 <sup>13</sup>C NMR**

Current Data Parameters  
 NAME gb634271208 (C16, C-8 S MPA)  
 EXPNO 5  
 PROCNO 1

F2 - Acquisition Parameters  
 Date\_ 20210813  
 Time 19.04 h  
 INSTRUM Avance  
 PROBHD Z199656\_0020 (1  
 PULPROG zgpg30  
 TD 65536  
 SOLVENT CDCl3  
 NS 512  
 DS 4  
 SWH 35714.283 Hz  
 FIDRES 1.089913 Hz  
 AQ 0.9175040 sec  
 RG 101  
 DM 14.000 usec  
 DE 18.00 usec  
 TE 298.0 K  
 D1 2.0000000 sec  
 D11 0.0300000 sec  
 TD0 1  
 SFO1 150.9908267 MHz  
 NUC1 13C  
 PO 3.33 usec  
 P1 10.00 usec  
 PLM1 41.91400146 M  
 SFO2 600.4224017 MHz  
 NUC2 1H  
 CPDPRG2 waltz16  
 PCPD2 80.00 usec  
 PLM2 13.51200008 M  
 PLM12 0.30124000 M  
 PLM13 0.15098180 M

F2 - Processing parameters  
 SI 65536  
 SF 150.9757075 MHz  
 WDW EM  
 SSB 0  
 LB 1.00 Hz  
 GB 0  
 PC 1.40

173.31  
 172.83  
 170.34  
 136.08  
 129.00  
 128.83  
 127.31  
 82.50  
 68.78  
 62.72  
 61.93  
 57.53  
 34.18  
 34.14  
 32.07  
 31.81  
 29.85  
 29.81  
 29.77  
 29.62  
 29.51  
 29.41  
 29.25  
 29.15  
 29.05  
 24.97  
 24.89  
 22.84  
 22.76  
 14.26  
 14.20

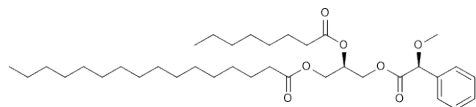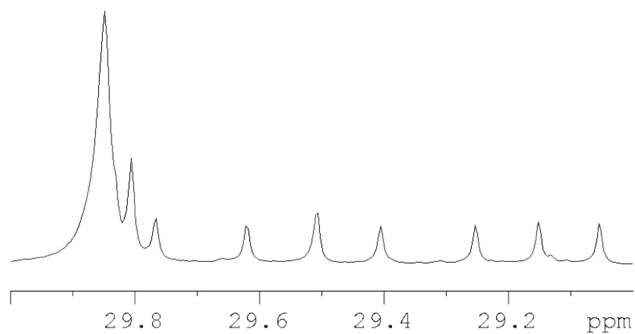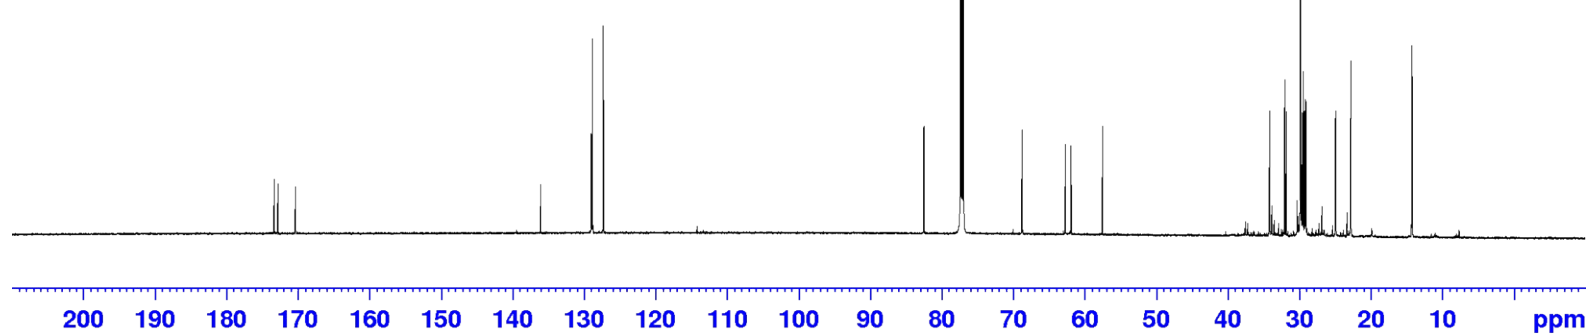

**(+)-(2R)-3-[[[(2S)-2-methoxy-2-phenylacetyl]oxy]-2-(octanoyloxy)propyl hexadecanoate (+)-S20**  
**HRMS**

Z:\data\2021\05 May\ESI88527.raw

01/06/2021 12:19 pm

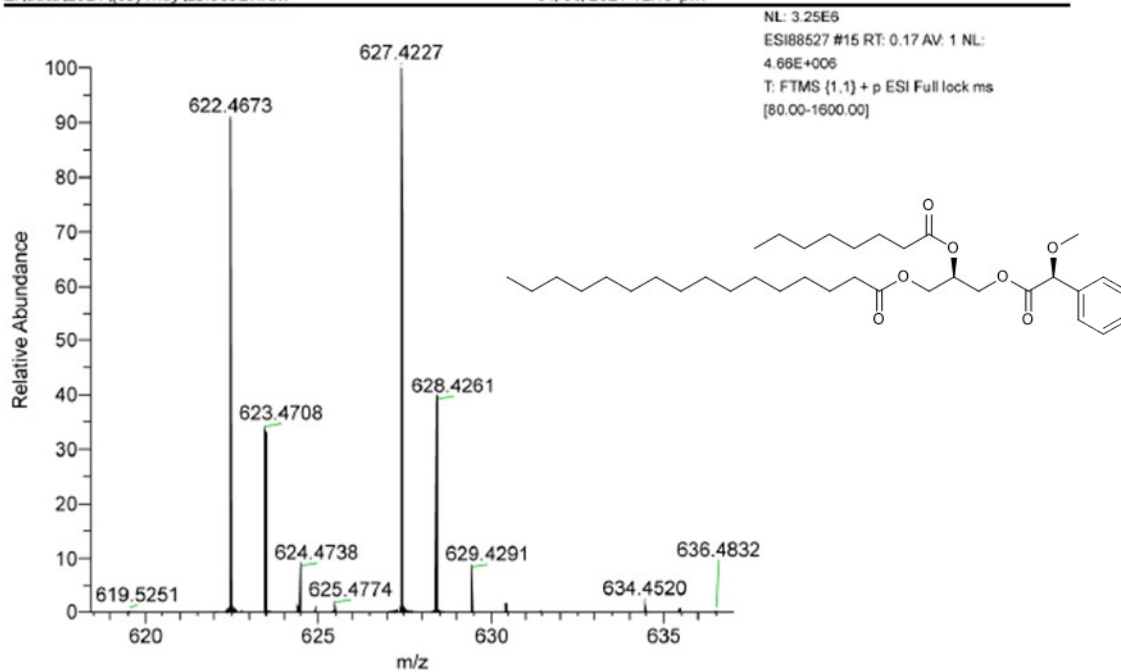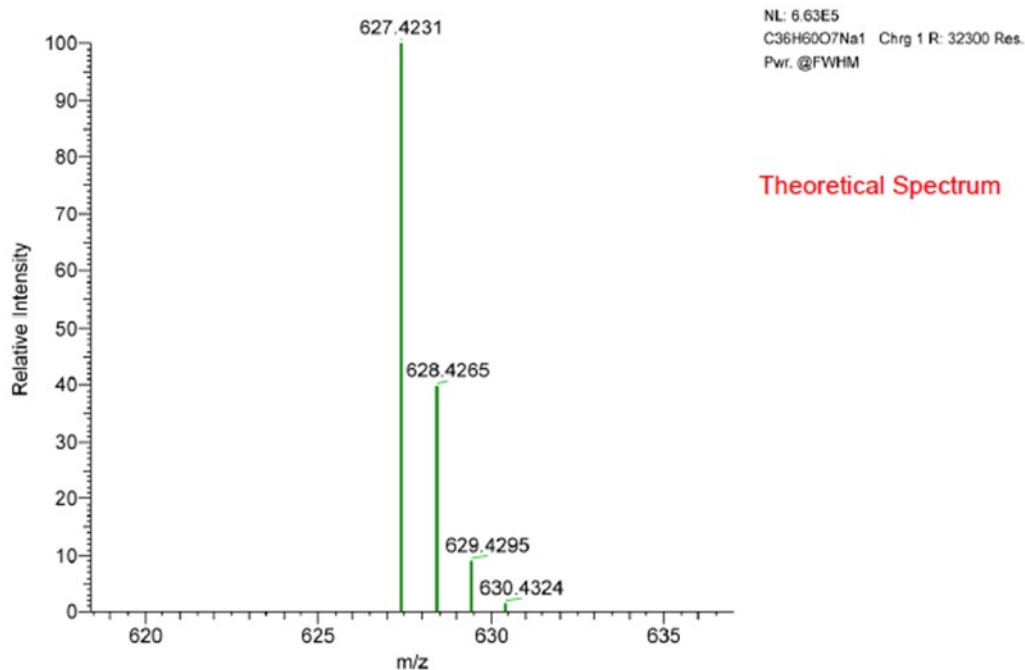

| Peak Mass Display... | Combin... | RDB    | Delta [p... | Theo. m... | Rank   | Combin... | # Match... | # Misse... | MS Cov... | Pattern... | MSMS... |         |
|----------------------|-----------|--------|-------------|------------|--------|-----------|------------|------------|-----------|------------|---------|---------|
| 627.4227             | C...H...  | 73.449 | 6.50        | -0.63      | 627.42 | 1         | 98.551     | 5          | 0         | 99.945     | 100     | 1/0/0/0 |

**(-)-(2R)-3-[[ (2R)-2-methoxy-2-phenylacetyl]oxy]-2-(octanoyloxy)propyl hexadecanoate (-)-S21 <sup>1</sup>H NMR**

Current Data Parameters  
NAME gb64281208 (C16, C8 R MPA)  
EXPNO 1  
PROCNO 1

F2 - Acquisition Parameters  
Date\_ 20210813  
Time 18.12 h  
INSTRUM Avance  
PROBHD Z159856\_0020 (PULPROG zg30)  
TD 65536  
SOLVENT CDCl3  
NS 16  
DS 2  
SWH 11904.762 Hz  
FIDRES 0.365304 Hz  
AQ 2.7525120 sec  
RG 58.3812  
DW 42.000 usec  
DE 22.00 usec  
TE 298.0 K  
D1 1.00000000 sec  
TDO 1  
SFO1 600.4230021 MHz  
NUC1 1H  
P0 4.00 usec  
P1 12.00 usec  
PLW1 13.51200008 W

F2 - Processing parameters  
SI 65536  
SF 600.4200138 MHz  
WDW EM  
SSB 0  
LB 0.30 Hz  
GB 0  
PC 1.00

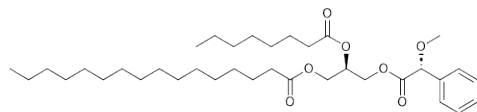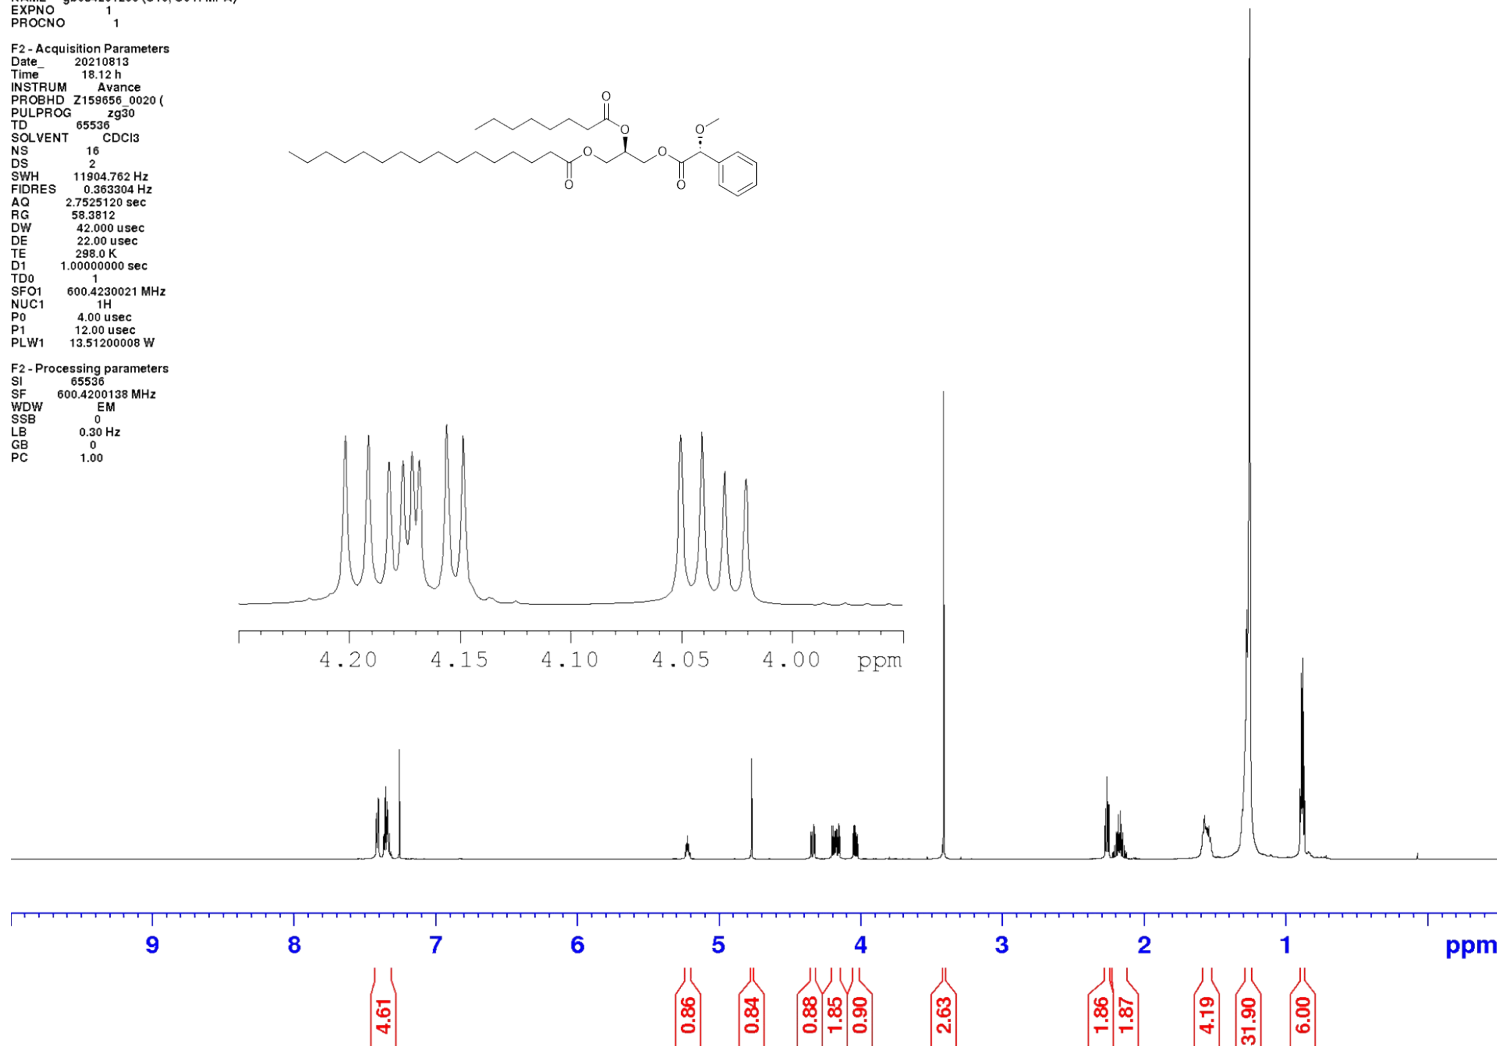

**(-)-(2R)-3-[[ (2R)-2-methoxy-2-phenylacetyl]oxy]-2-(octanoyloxy)propyl hexadecanoate (-)-S21 <sup>13</sup>C NMR**

Current Data Parameters  
 NAME gb634281208 (C16, C8 R MPA)  
 EXPNO 5  
 PROCNO 1

F2 - Acquisition Parameters  
 Date\_ 20210813  
 Time 18:59 h  
 INSTRUM Avance  
 PROBHD z139636\_002D (zpg30)  
 PULPROG zgpg30  
 TD 65536  
 SOLVENT CDCl3  
 NS 512  
 DS 4  
 SWH 35714.285 Hz  
 FIDRES 1.089913 Hz  
 AQ 0.9175040 sec  
 RG 101  
 DM 14.000 usec  
 DE 18.00 usec  
 TE 298.0 K  
 D1 2.0000000 sec  
 D11 0.0300000 sec  
 ZD 1  
 SFO1 150.9808267 MHz  
 NUC1 13C  
 PC 3.33 usec  
 P1 10.00 usec  
 PLM1 41.91400146 M  
 SFO2 600.4224017 MHz  
 NUC2 1H  
 CDEPRG[2] waltz16  
 PCPD2 80.00 usec  
 PLM2 13.51200008 M  
 PLM12 0.30124050 M  
 PLM13 0.1508180 M

F2 - Processing parameters  
 SI 65536  
 SF 150.9757081 MHz  
 WMW EM  
 GSB 0  
 LB 1.00 Hz  
 GB 0  
 PC 1.40

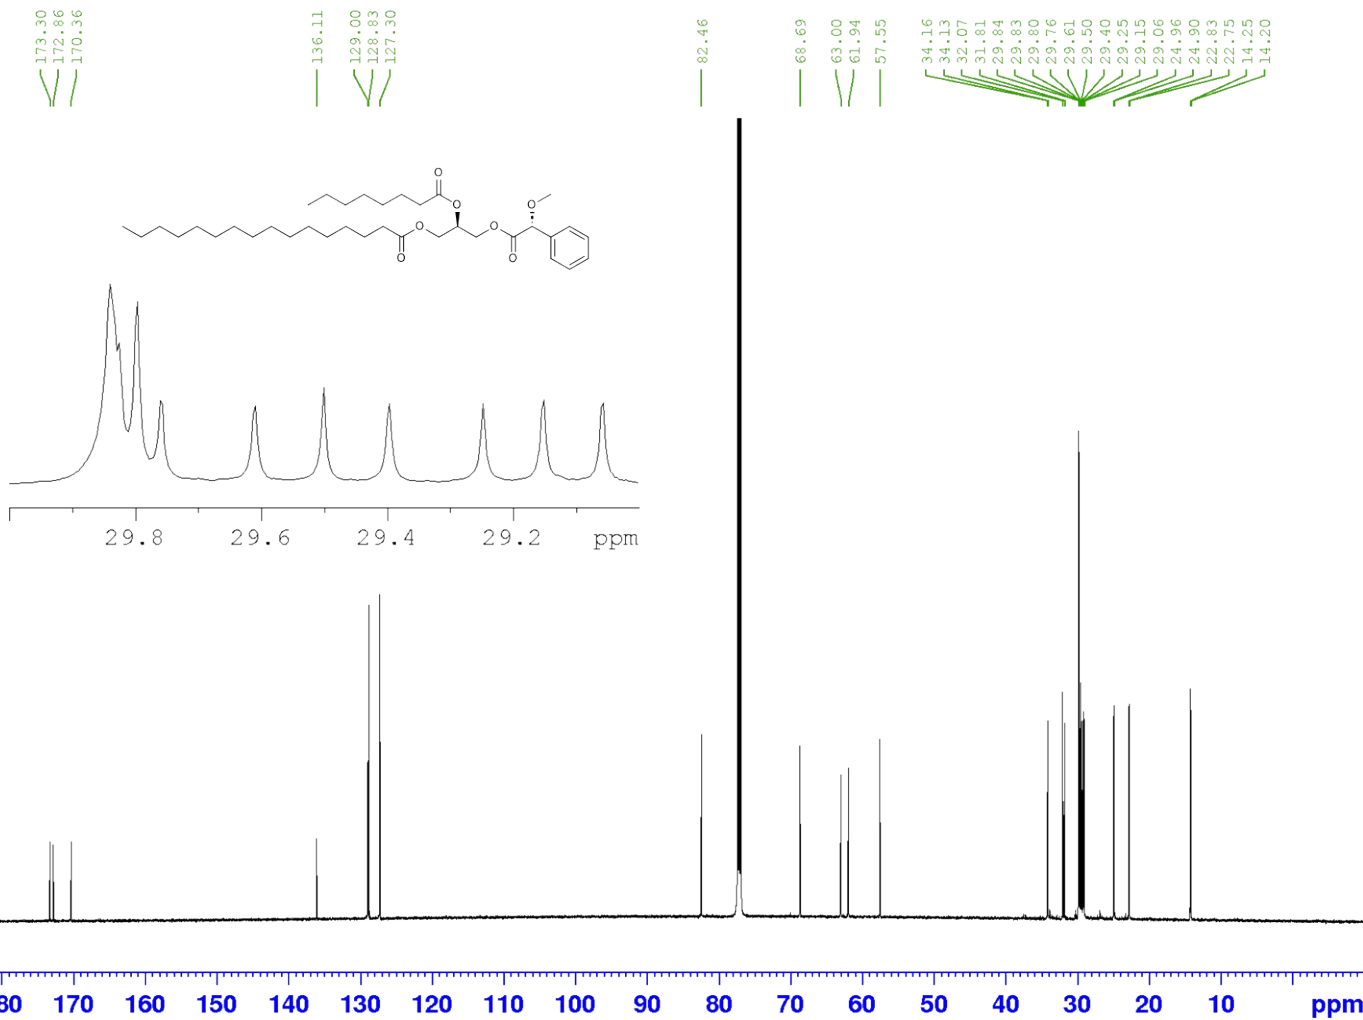

(-)-(2R)-3-[[2-(2-methoxy-2-phenylacetyl)oxy]-2-(octanoyloxy)propyl hexadecanoate (-)-S21  
HRMS

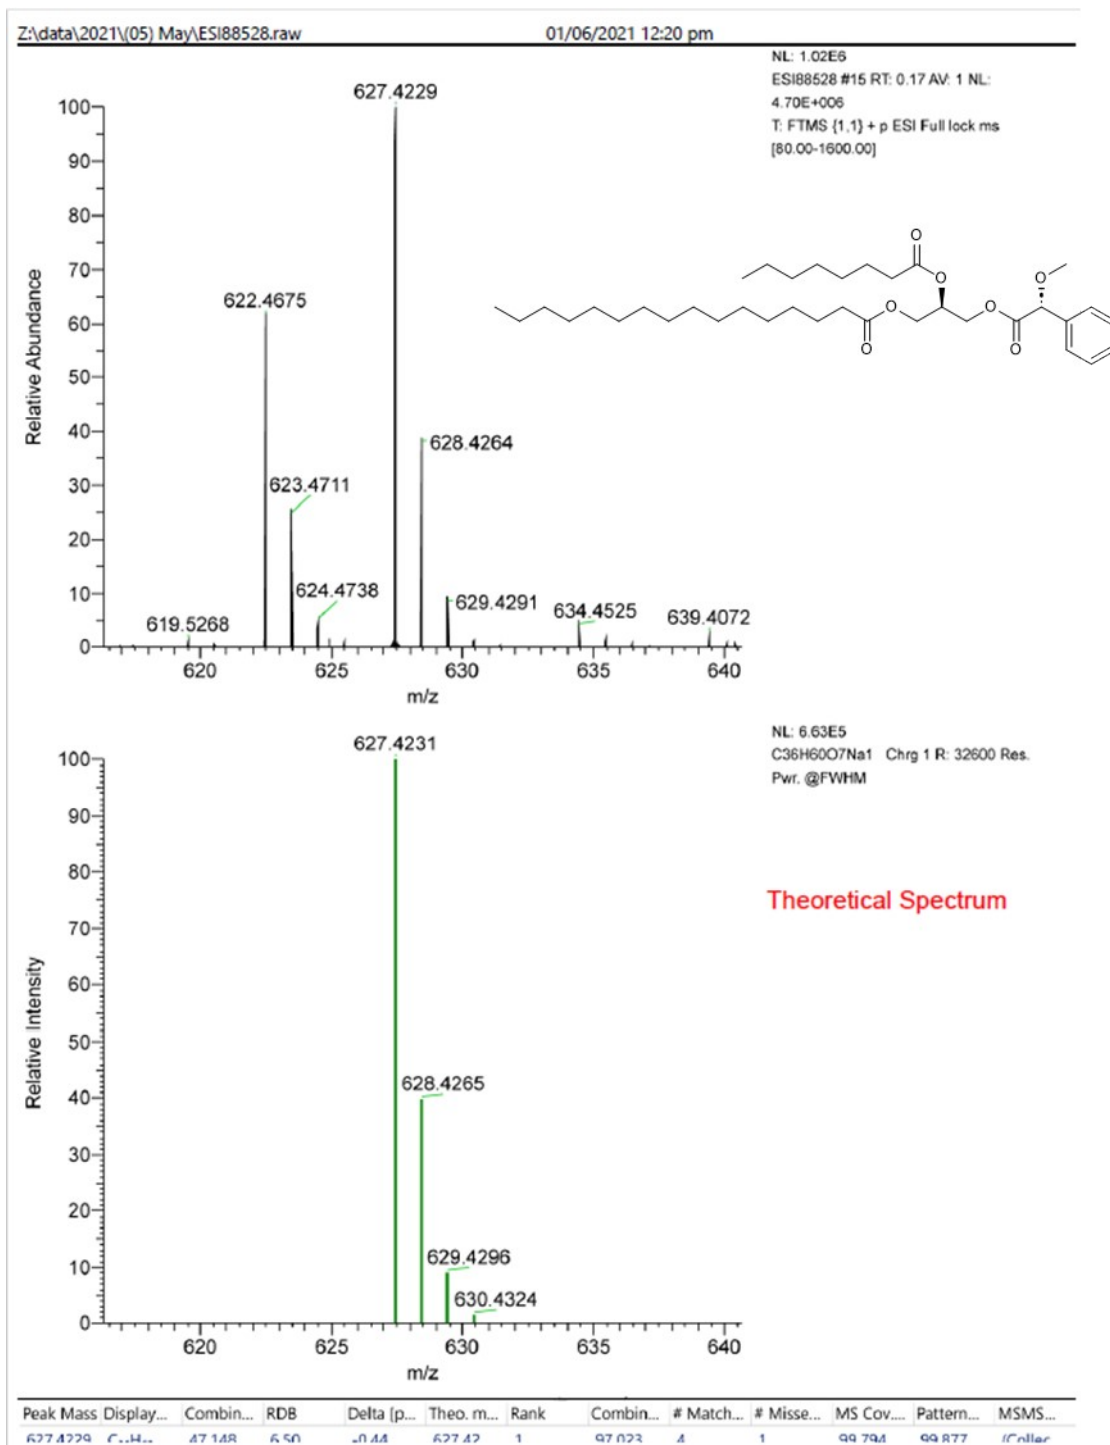

**(+)-(2R)-1-[[[(2S)-2-methoxy-2-phenylacetyl]oxy]-3-(octanoyloxy)propan-2-yl hexadecanoate (+)-S22 <sup>1</sup>H NMR**

Current Data Parameters  
 NAME gb634291208 (C8, C16 S MPA)  
 EXPNO 1  
 PROCNO 1

F2 - Acquisition Parameters  
 Date\_ 20210813  
 Time 19:07 h  
 INSTRUM Avance  
 PROBHD Z158656.0020 ( )  
 PULPROG zg30  
 TD 65536  
 SOLVENT CDCl3  
 NS 16  
 DS 2  
 SWH 11904.762 Hz  
 FIDRES 0.363304 Hz  
 AQ 2.7525120 sec  
 RG 74.5948  
 DW 42.000 usec  
 DE 22.00 usec  
 TE 298.0 K  
 D1 1.00000000 sec  
 TD0 1  
 SFO1 600.4230021 MHz  
 NUC1 1H  
 P0 4.00 usec  
 P1 12.00 usec  
 PLW1 13.51200008 W

F2 - Processing parameters  
 SI 65536  
 SF 600.4200145 MHz  
 WDW EM  
 SSB 0  
 LB 0.30 Hz  
 GB 0  
 PC 1.00

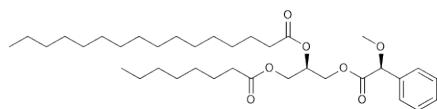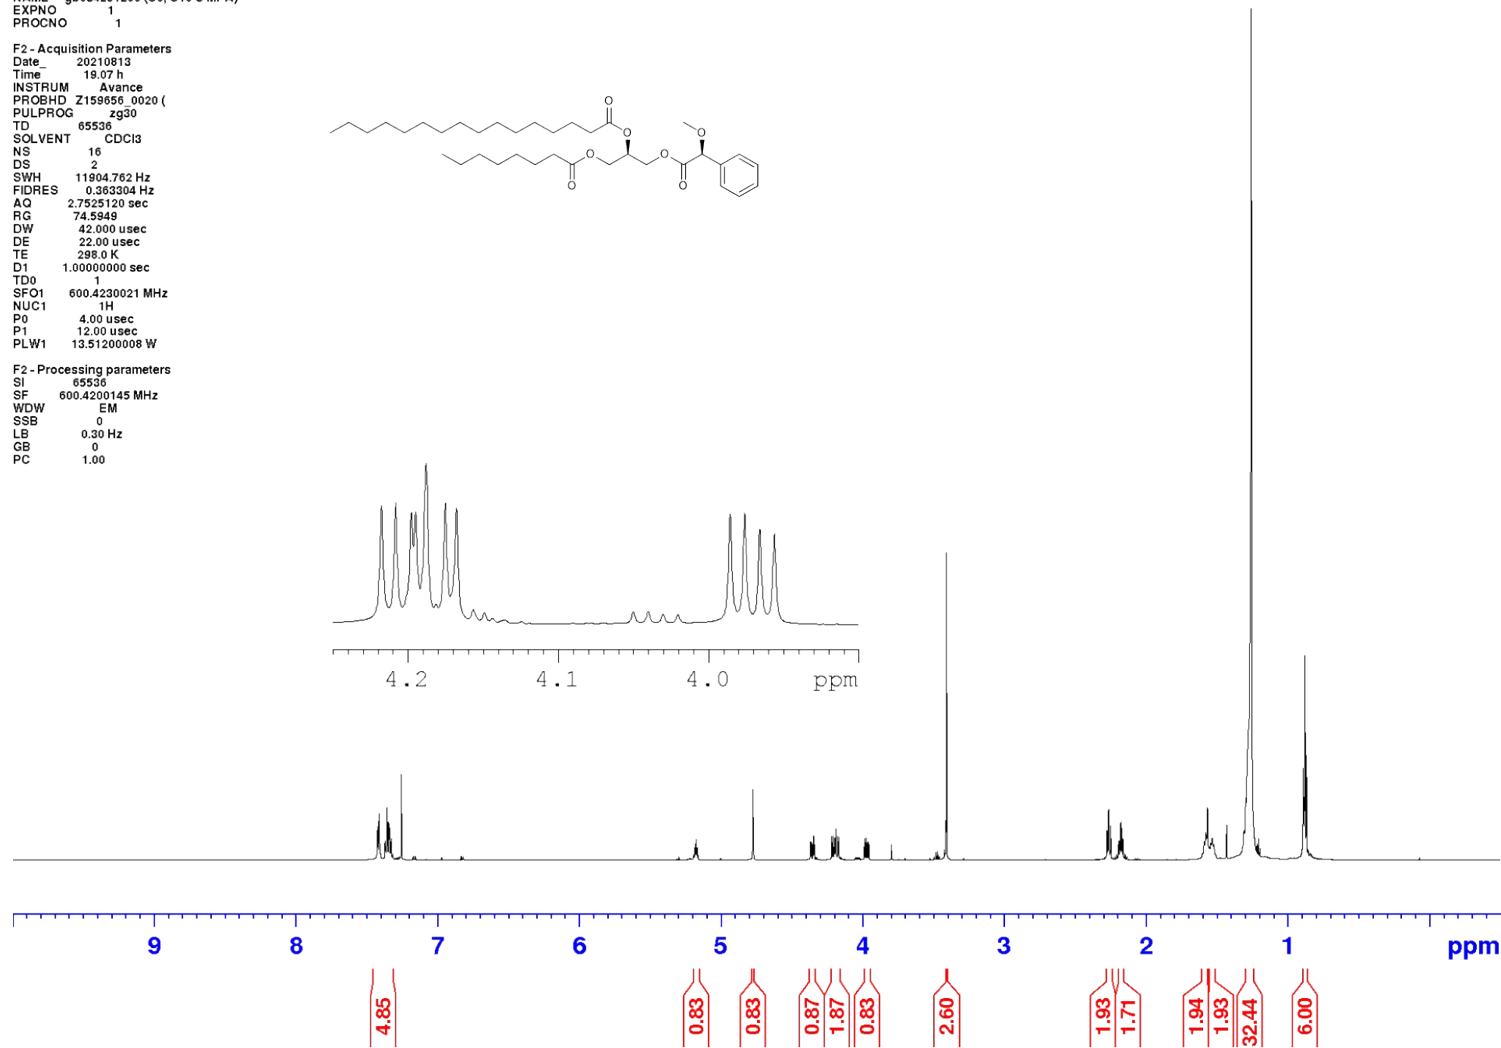

**(+)-(2R)-1-[[2(S)-2-methoxy-2-phenylacetyl]oxy]-3-(octanoyloxy)propan-2-yl hexadecanoate (+)-S22 <sup>13</sup>C NMR**

Current Data Parameters  
 NAME g634291208 (3, C16 S MPA)  
 EXPNO 5  
 PROCNO 1

F2 - Acquisition Parameters  
 Date\_ 20210813  
 Time 19.55 h  
 INSTRUM Avance  
 PROBHD z159656\_0020 ( (   
 PULPROG zgpg30  
 TD 65336  
 SOLVENT CDCl3  
 NS 512  
 DS 4  
 SWE 35714.285 Hz  
 FIDRES 1.089913 Hz  
 AQ 0.9175040 sec  
 RG 101  
 DM 14.000 usec  
 DE 18.00 usec  
 TE 298.0 K  
 D1 2.00000000 sec  
 D11 0.03000000 sec  
 TD0 1  
 SFO1 150.9908267 MHz  
 NUC1 13C  
 FO 3.33 usec  
 FI 10.00 usec  
 FLM1 41.91400146 W  
 SFO2 600.4224017 MHz  
 NUC2 1H  
 CPDPRG2 waltz16  
 PCPD2 80.00 usec  
 PLM2 13.51200008 W  
 PLM12 0.30124050 W  
 PLM13 0.15098180 W

173.40  
 172.94  
 170.43  
 136.18  
 129.10  
 128.92  
 127.40  
 82.60  
 68.87  
 62.82  
 62.02  
 57.62  
 34.28  
 34.23  
 32.16  
 31.89  
 29.94  
 29.91  
 29.90  
 29.88  
 29.73  
 29.60  
 29.51  
 29.31  
 29.28  
 29.14  
 25.06  
 24.99  
 22.93  
 22.83  
 14.35  
 14.29

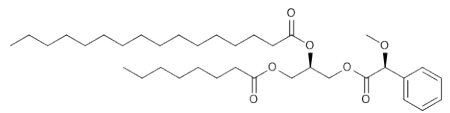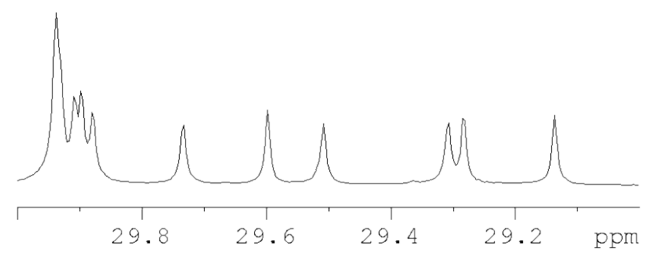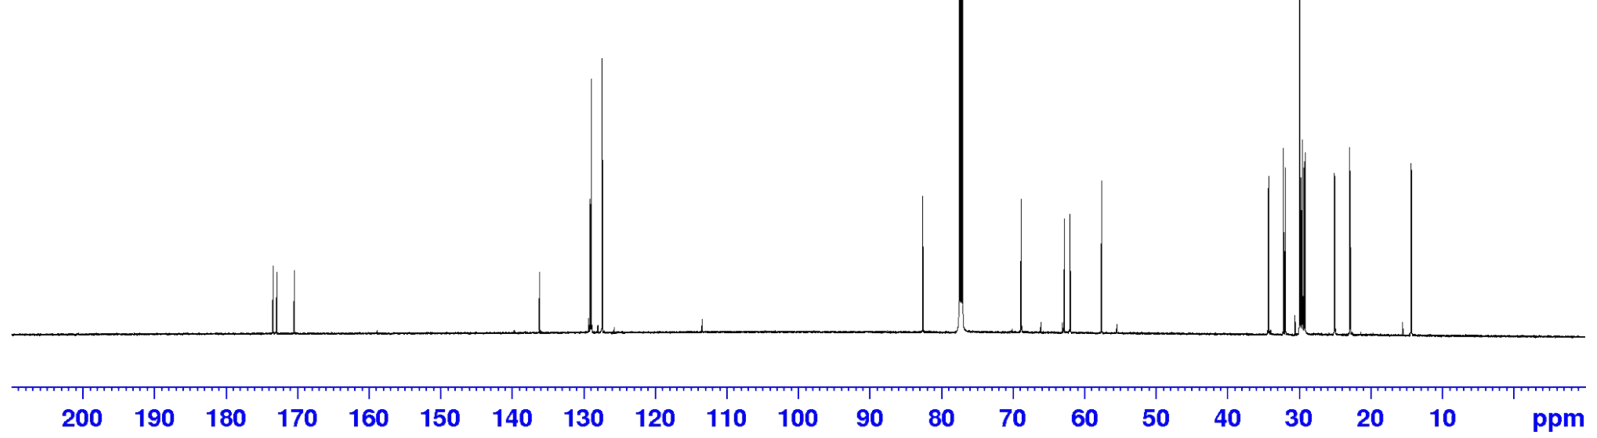

**(+)-(2R)-1-[[[(2S)-2-methoxy-2-phenylacetyl]oxy]-3-(octanoyloxy)propan-2-yl hexadecanoate (+)-S22 HRMS**

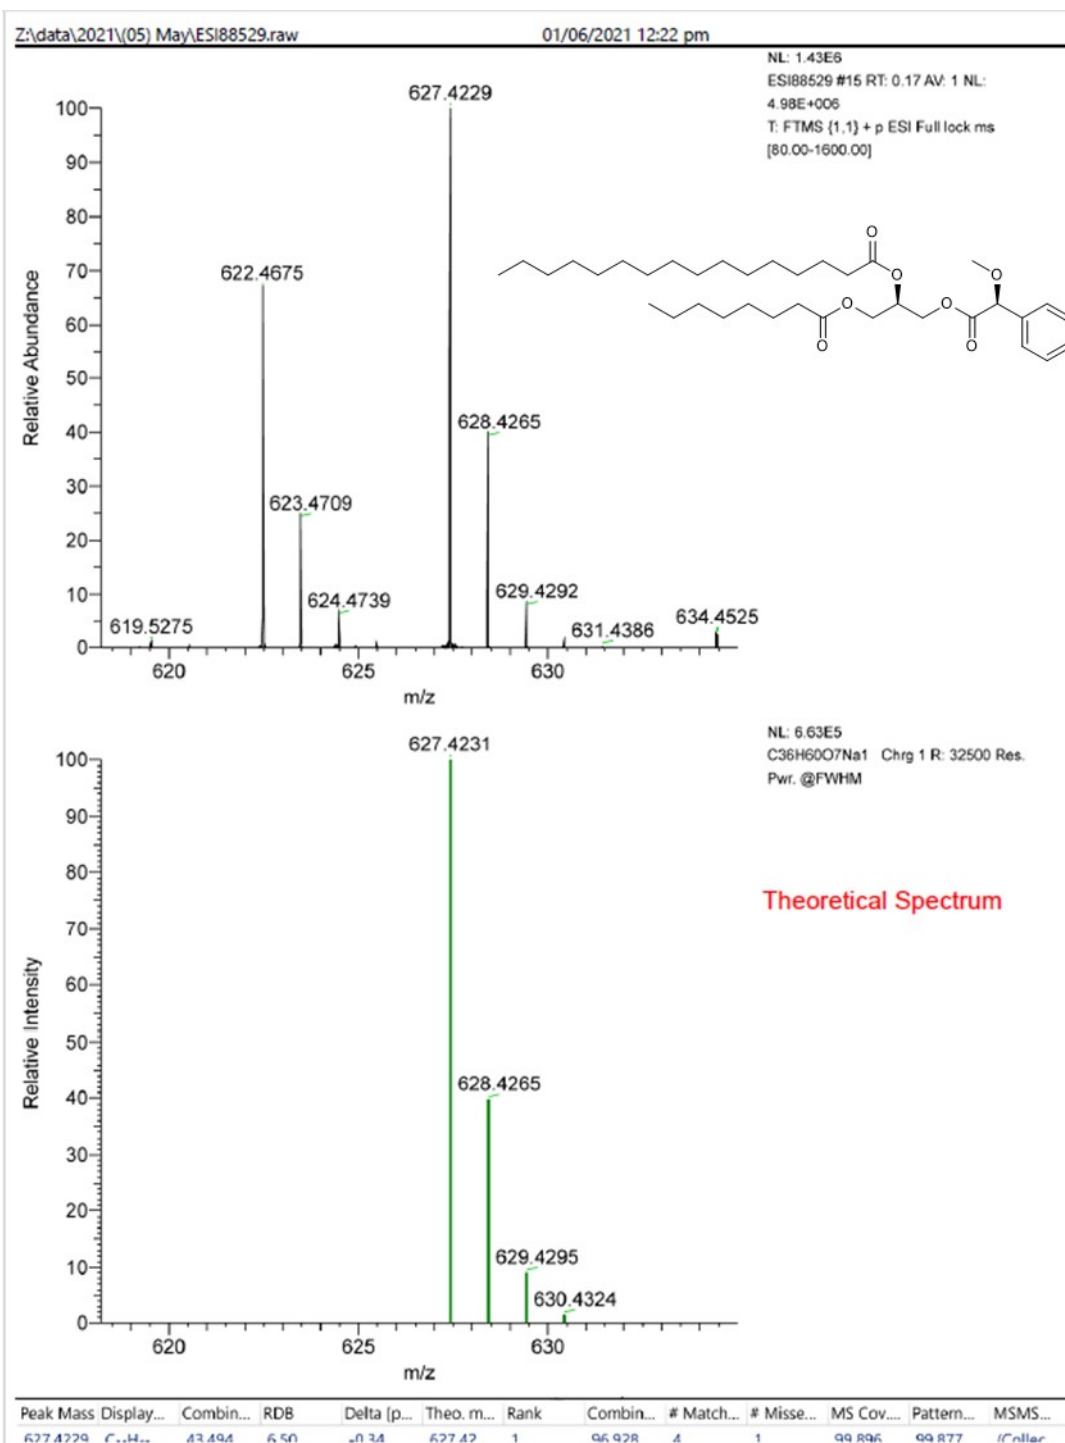

(-)-(2R)-1-[[[(2R)-2-methoxy-2-phenylacetyl]oxy]-3-(octanoyloxy)propan-2-yl hexadecanoate (-)-S23 <sup>1</sup>H NMR

Current Data Parameters  
NAME gb54301208 (C8, C16 R MPA)  
EXPNO 6  
PROCNO 1

F2 - Acquisition Parameters  
Date\_ 20210817  
Time 13.10 h  
INSTRUM Avance  
PROBHD Z159856\_0020 (PULPROG zg30)  
TD 65536  
SOLVENT CDCl3  
NS 16  
DS 2  
SWH 11904.762 Hz  
FIDRES 0.365304 Hz  
AQ 2.7525120 sec  
RG 77.9052  
DW 42.000 usec  
DE 22.00 usec  
TE 298.0 K  
D1 1.00000000 sec  
TD0 1  
SFO1 600.4230021 MHz  
NUC1 1H  
P0 4.00 usec  
P1 12.00 usec  
PLW1 13.51200008 W

F2 - Processing parameters  
SI 65536  
SF 600.420145 MHz  
WDW EM  
SSB 0  
LB 0.30 Hz  
GB 0  
PC 1.00

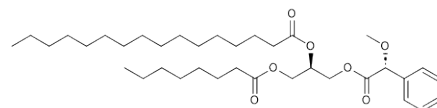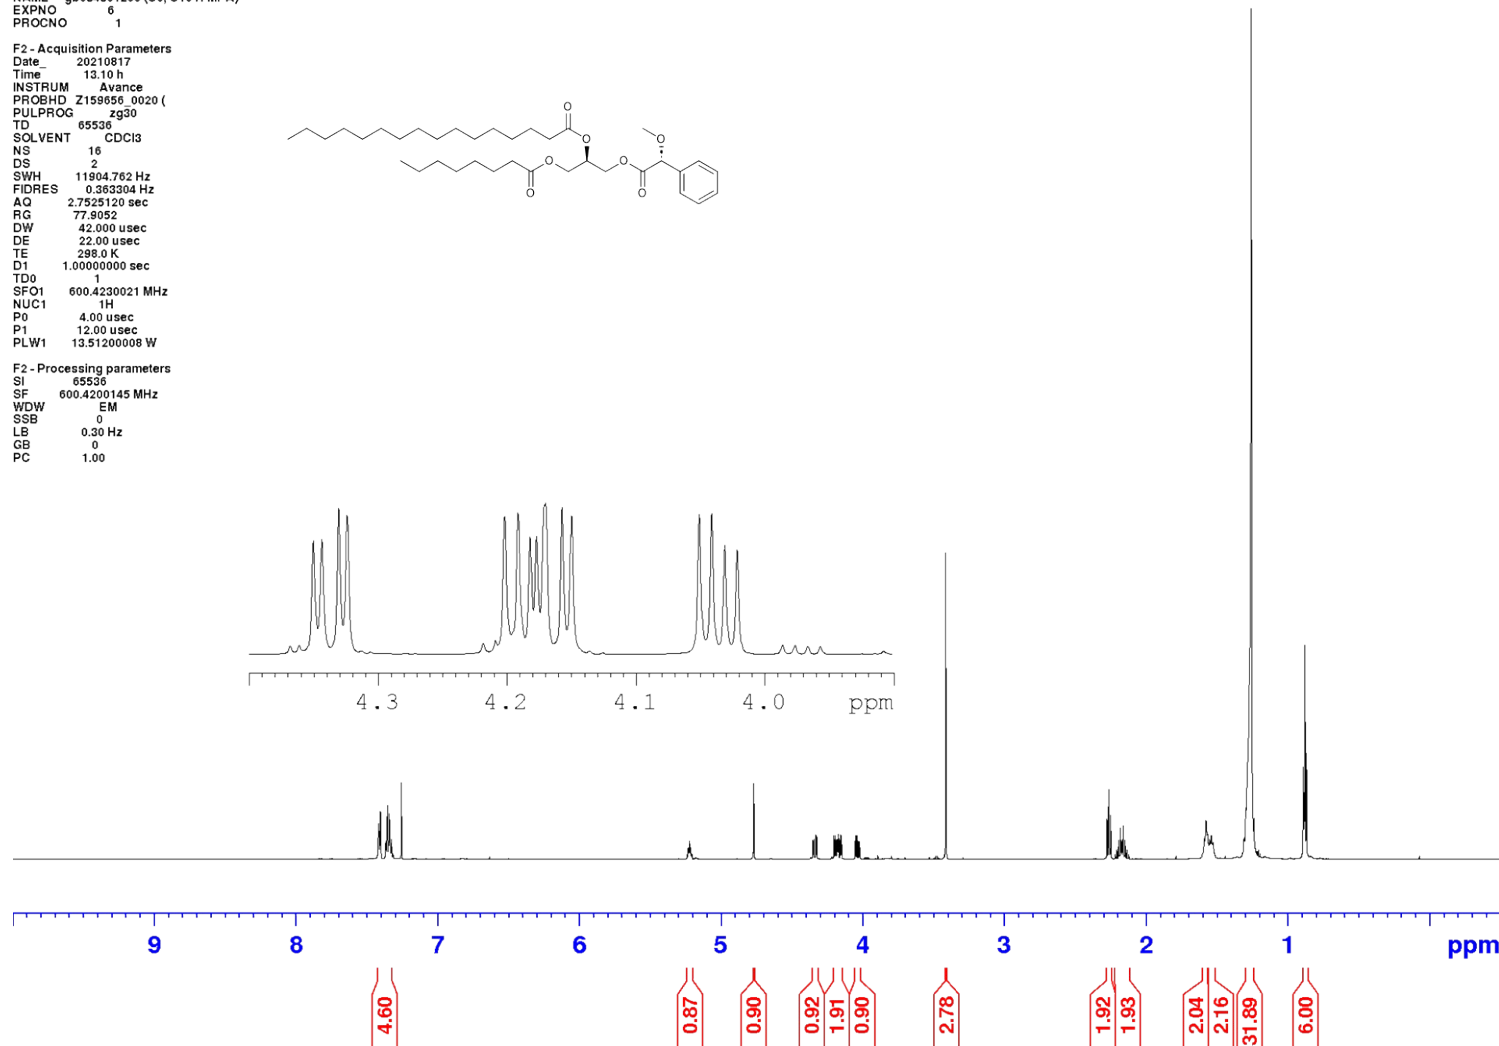

(-)-(2R)-1-[[[(2R)-2-methoxy-2-phenylacetyl]oxy]-3-(octanoyloxy)propan-2-yl hexadecanoate (-)-S23 <sup>13</sup>C NMR

Current Data Parameters  
 NAME gb634301208 (C8, C16 R MPA)  
 EXPNO 5  
 PROCNO 1

F2 - Acquisition Parameters  
 Date\_ 20210813  
 Time 20:30 h  
 INSTRUM Avance  
 PROBHD z159656\_002D (4  
 PULPROG zgpg30  
 TD 65536  
 SOLVENT CDCl3  
 NS 512  
 DS 4  
 SWH 35714.285 Hz  
 FIDRES 1.089913 Hz  
 AQ 0.9175040 sec  
 RG 191  
 DM 14.000 usec  
 DE 18.000 usec  
 TE 298.0 K  
 D1 2.00000000 sec  
 D11 0.03000000 sec  
 TD0 1  
 SFO1 150.998267 MHz  
 NUC1 13C  
 PO 3.33 usec  
 P1 10.00 usec  
 PLM1 41.91400146 M  
 SFO2 600.4224017 MHz  
 NUC2 1H  
 CPDPRG2 waltz16  
 PCPD2 80.00 usec  
 PLM2 13.51200008 M  
 PLM12 0.30124050 M  
 PLM13 0.15098180 M

F2 - Processing parameters  
 SI 65536  
 SF 150.9757084 MHz  
 MHZ EM  
 SSB 0  
 LB 1.00 Hz  
 GB 0  
 PC 1.40

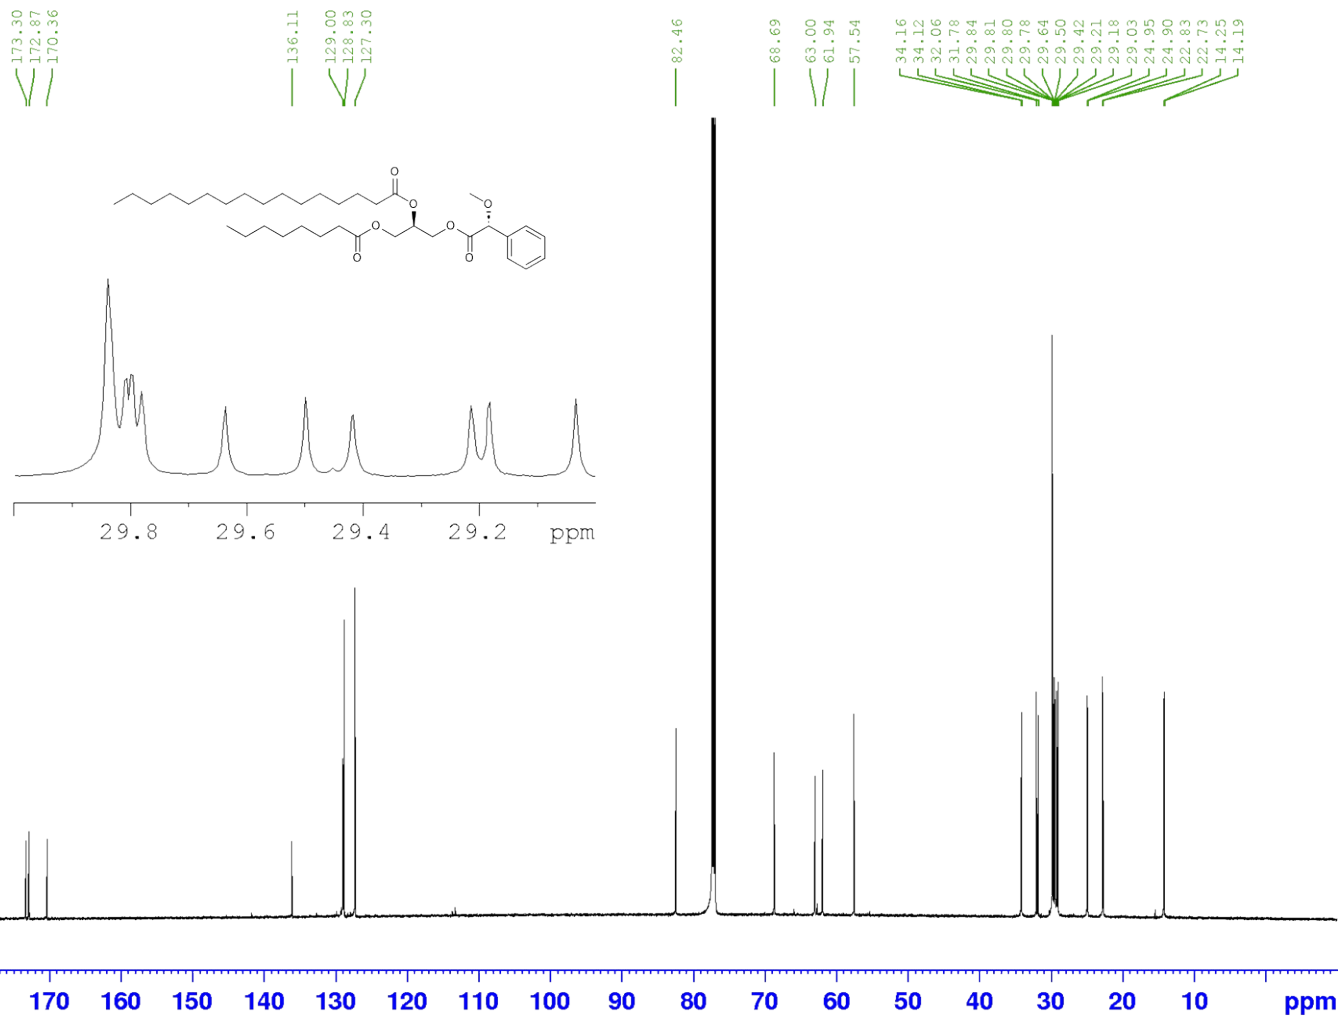

**(-)-(2R)-1-[[[(2R)-2-methoxy-2-phenylacetyl]oxy]-3-(octanoyloxy)propan-2-yl hexadecanoate (-)-S23 HRMS**

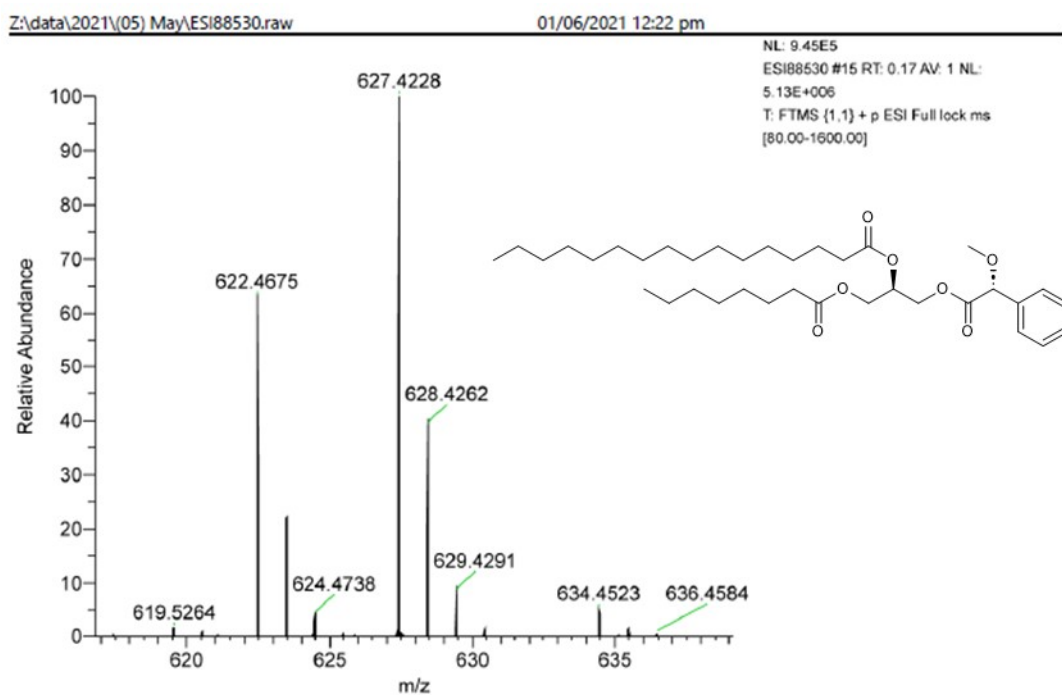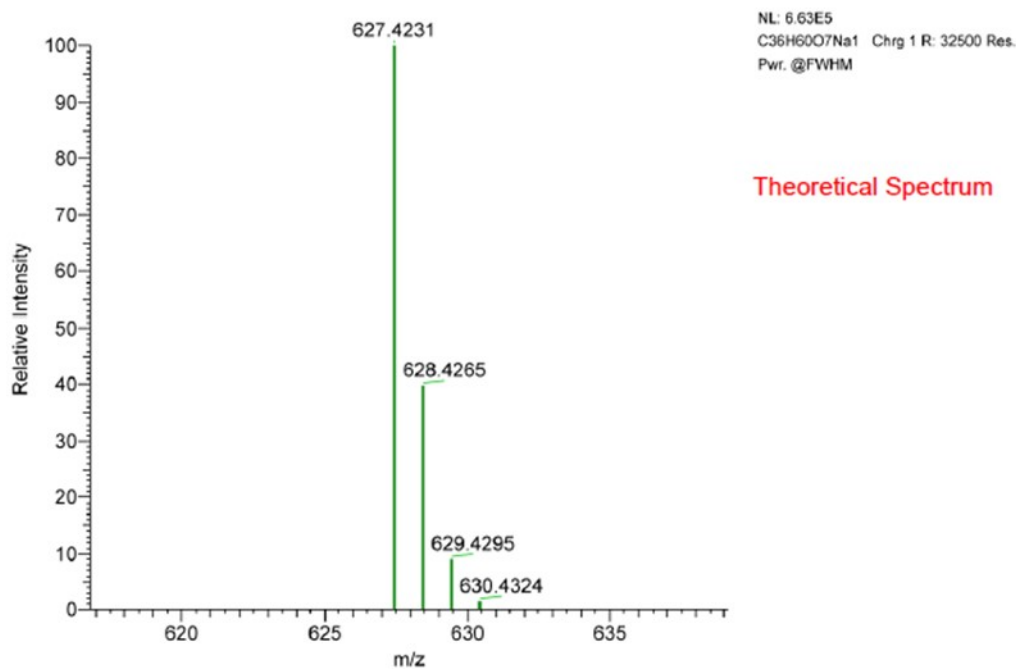

| Peak Mass Display... | Combin... | RDB    | Delta [p... | Theo. m... | Rank   | Combin... | # Match... | # Misse... | MS Cov... | Pattern... | MSMS... |          |
|----------------------|-----------|--------|-------------|------------|--------|-----------|------------|------------|-----------|------------|---------|----------|
| 627.4228             | C...H...  | 42.899 | 6.50        | -0.53      | 627.42 | 1         | 97.047     | 4          | 1         | 100        | 99.877  | 1/Cellar |

(+)-(S)-3-(bis(4-methoxyphenyl)(phenyl)methoxy)-2-((3-(3-(dodec-11-yn-1-yl)-3H-diazirin-3-yl)propanoyl)oxy)propyl palmitate S24 <sup>1</sup>H NMR

Current Data Parameters  
 NAME gb645232311  
 EXPNO 1  
 PROCNO 1

F2 - Acquisition Parameters  
 Date\_ 20211123  
 Time 9.59 h  
 INSTRUM Avance  
 PROBHD Z159656\_0020 (zg30)  
 PULPROG zg30  
 TD 65536  
 SOLVENT CDCl3  
 NS 16  
 DS 2  
 SWH 11904.762 Hz  
 FIDRES 0.363304 Hz  
 AQ 2.7525120 sec  
 RG 44.1803  
 DW 42.000 usec  
 DE 22.00 usec  
 TE 298.0 K  
 D1 1.0000000 sec  
 TD0 1  
 SFO1 600.4230021 MHz  
 NUC1 <sup>1</sup>H  
 PO 4.00 usec  
 P1 12.00 usec  
 PLW1 13.5120008 W

F2 - Processing parameters  
 SI 65536  
 SF 600.4200154 MHz  
 WDW EM  
 SSB 0  
 LB 0.30 Hz  
 GB 0  
 PC 1.00

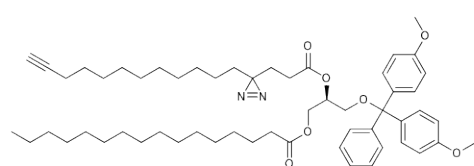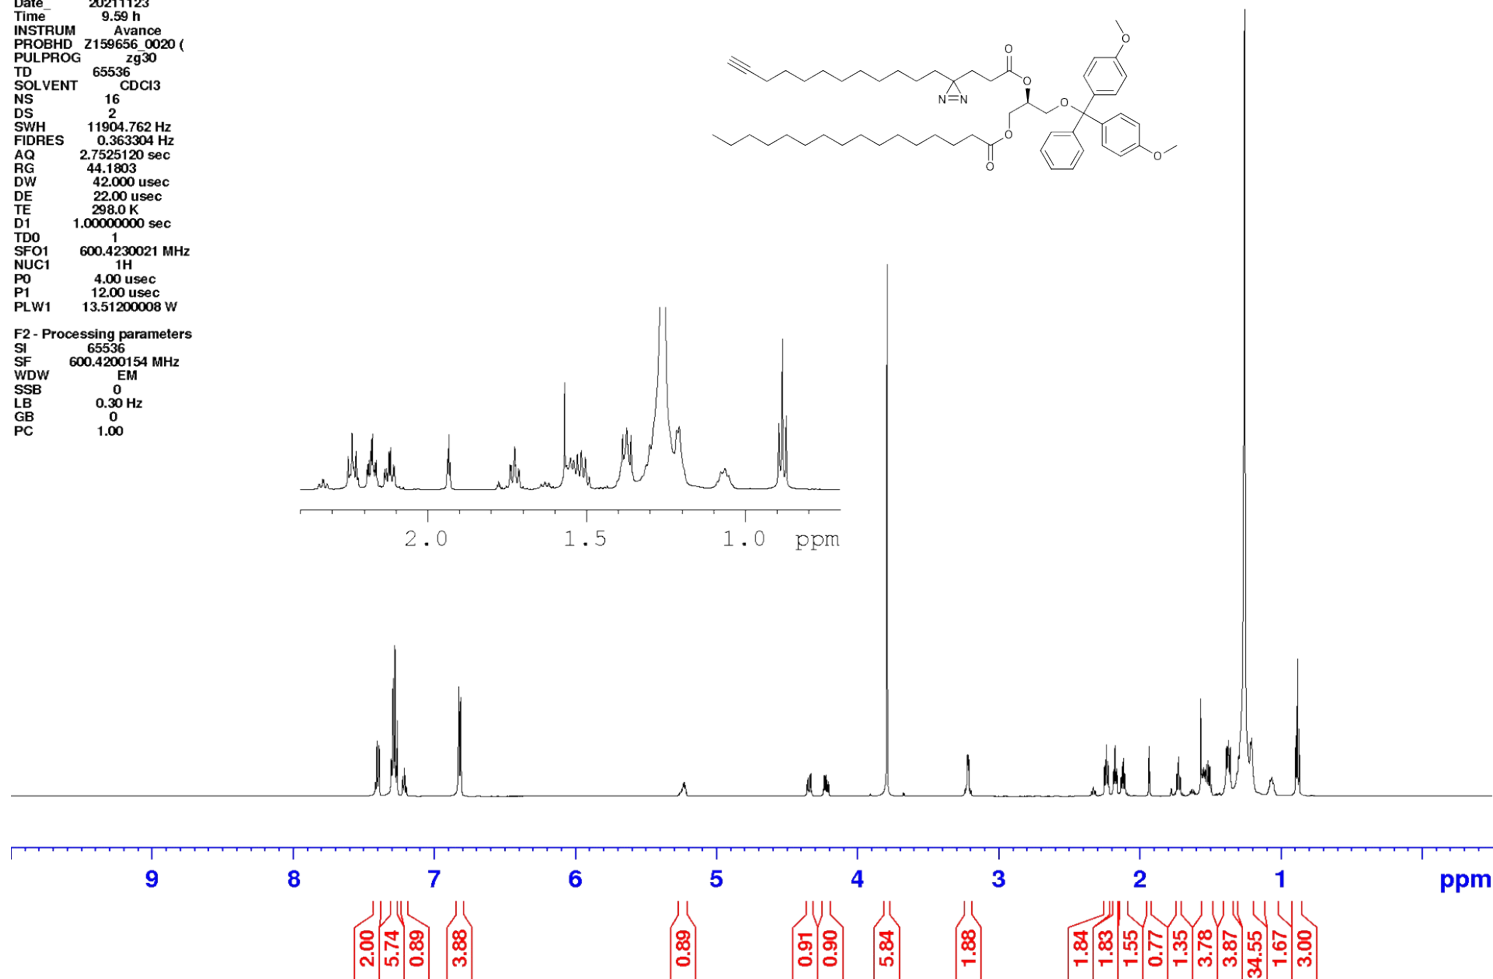

**(+)-(S)-3-(bis(4-methoxyphenyl)(phenyl)methoxy)-2-((3-(3-(dodec-11-yn-1-yl)-3H-diazirin-3-yl)propanoyl)oxy)propyl palmitate S24 <sup>13</sup>C NMR**

```

Current Data Parameters
NAME      gb645232311
EXPNO    5
PROCNO   1

F2 - Acquisition Parameters
Date_    20211123
Time     11:07 h
INSTRUM  Avance
PROBHD   Z199656_0020 (
PULPROG  zgpg30
TD       65536
SOLVENT  CDCl3
NS       512
DS       4
SWH      35714.283 Hz
FIDRES   1.089913 Hz
AQ       0.9175040 sec
RG       101
DM       14.000 usec
DE       18.00 usec
TE       298.0 K
D1       2.0000000 sec
D11      0.0300000 sec
EDU      1
SFO1     150.9908267 MHz
NUC1     13C
PC       3.33 usec
P1       10.00 usec
PLM1     41.91400146 M
SFO2     600.4224017 MHz
NUC2     1H
CPDPRG2  waltz16
PCPD2    80.00 usec
PLM2     13.51200008 M
PLM12    0.30124000 M
PLM13    0.15098180 M

F2 - Processing parameters
SI       65536
SF       150.9757097 MHz
WDW      EM
SSB      0
LB       1.00 Hz
GB       0
PC       1.40
    
```

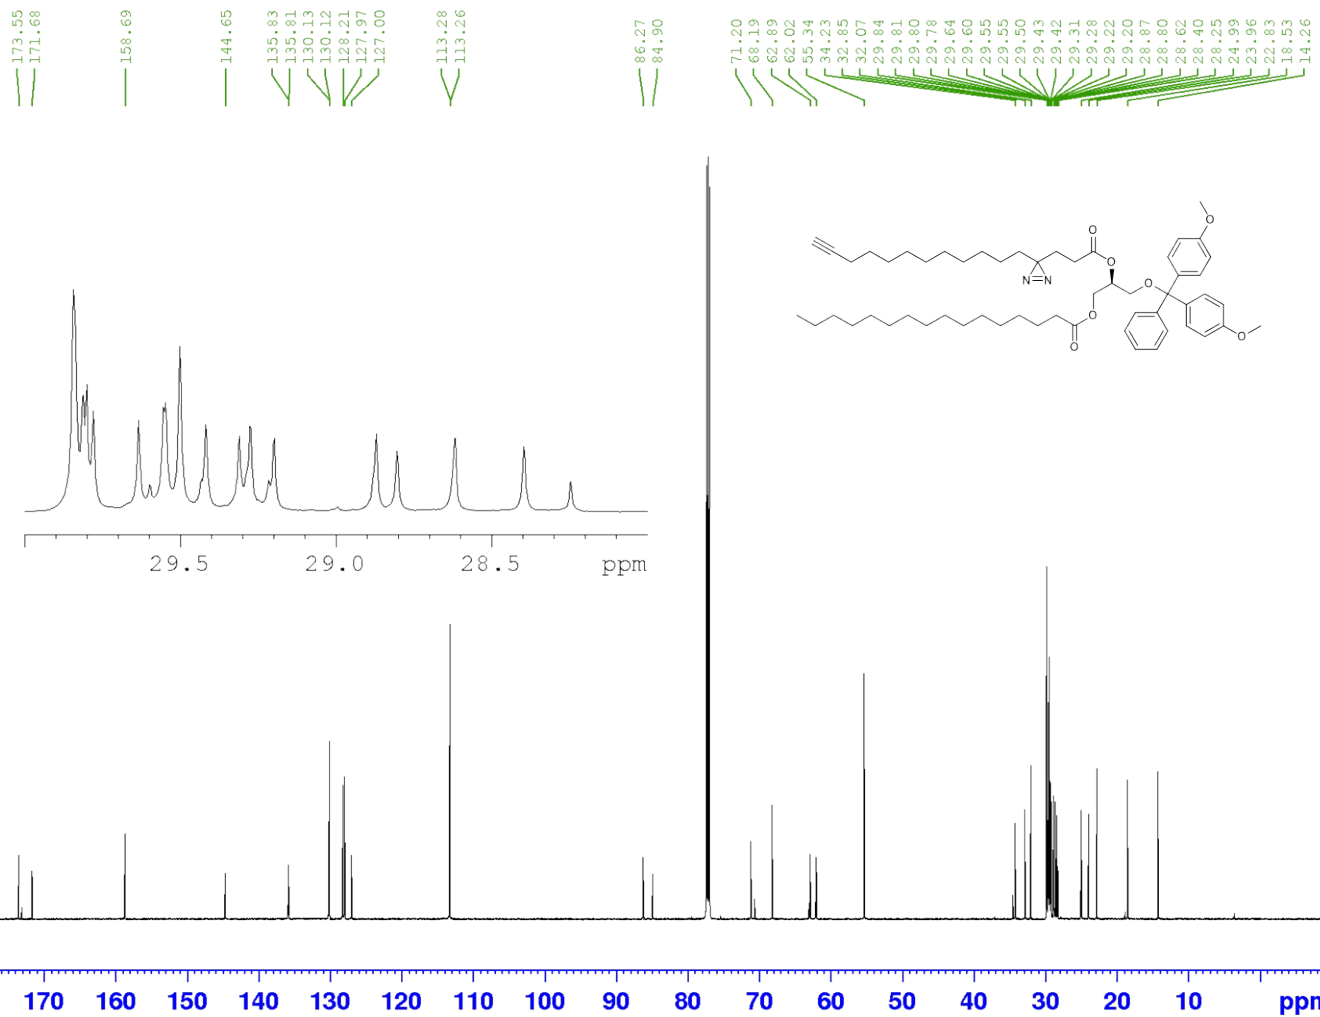

**(+)-(S)-3-(bis(4-methoxyphenyl)(phenyl)methoxy)-2-((3-(3-(dodec-11-yn-1-yl)-3H-diazirin-3-yl)propanoyl)oxy)propyl palmitate S24 HRMS**

Z:\data\2021\10\ Oct\ESI90914.raw

14/10/2021 1:48 pm

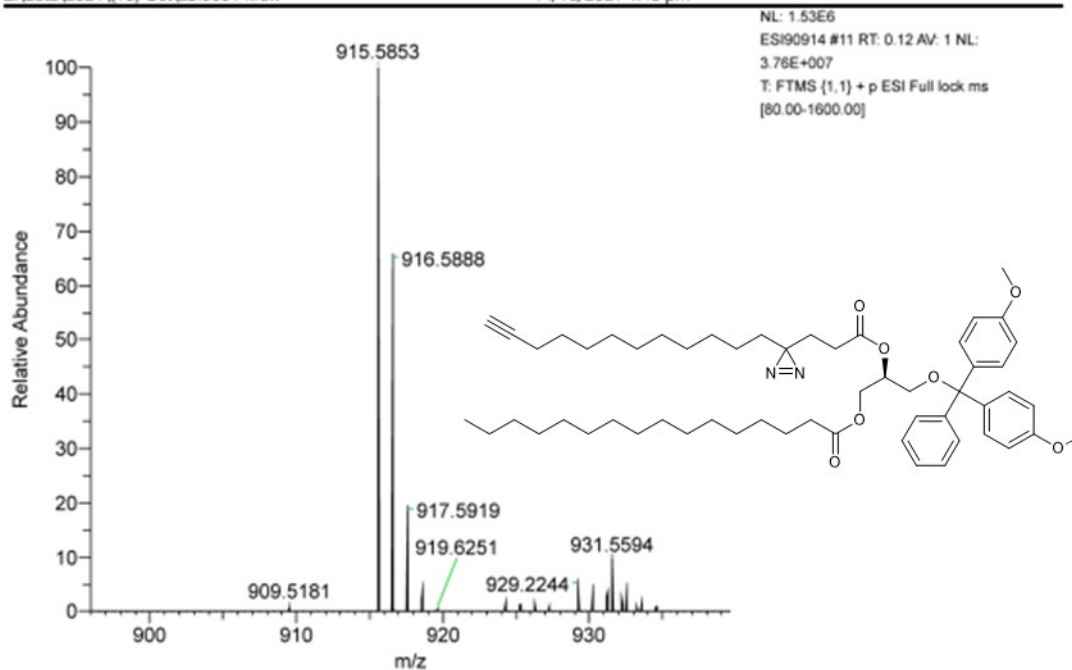

NL: 1.53E6  
ESI90914 #11 RT: 0.12 AV: 1 NL:  
3.76E+007  
T: FTMS (1,1) + p ESI Full lock ms  
[80.00-1600.00]

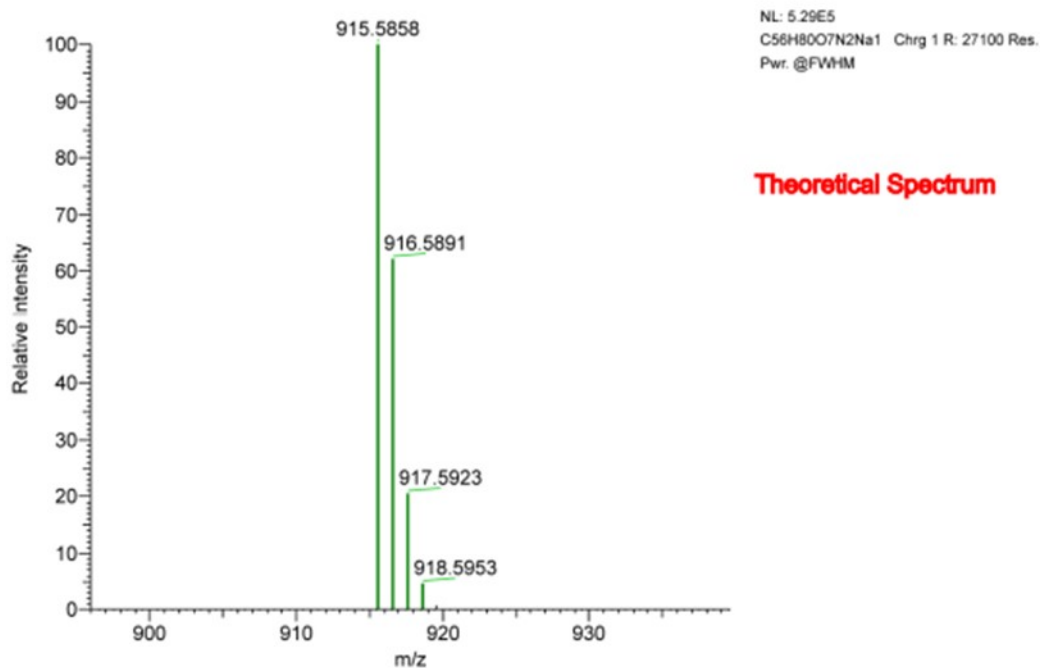

NL: 5.29E5  
C56H80O7N2Na1 Chrg 1 R: 27100 Res.  
Pwr. @FWHM

| Peak Mass Display... | Combin... | RDB   | Delta [p... | Theo. m... | Rank | Combin... | # Match... | # Misse... | MS Cov... | Pattern... | MSMS... |
|----------------------|-----------|-------|-------------|------------|------|-----------|------------|------------|-----------|------------|---------|
| 915.5853             | ...       | 17.50 | 0.09        | 915.58     | 1    | 97.510    | 4          | 1          | 100       | 99.580     | 1/1000  |

**(R)-2-((3-(3-(dodec-11-yn-1-yl)-3H-diazirin-3-yl)propanoyl)oxy)-3-((S)-2-methoxy-2-phenylacetoxy)propyl palmitate (+)-S25** <sup>1</sup>H NMR

Current Data Parameters  
NAME gb716170509 (R, R)  
EXPNO 1  
PROCNO 1

F2 - Acquisition Parameters  
Date 20230905  
Time 5.43 h  
INSTRUM av600  
PROBHD Z130037\_0008 (zg30)  
PULPROG 65536  
TD 65536  
SOLVENT CDCl3  
NS 16  
DS 2  
SWH 12019.230 Hz  
FIDRES 0.366798 Hz  
AQ 2.7262976 sec  
RG 50.94  
DW 41.600 usec  
DE 10.00 usec  
TE 298.0 K  
D1 1.0000000 sec  
TD0 1  
SFO1 600.1830009 MHz  
NUC1 <sup>1</sup>H  
PO 4.00 usec  
P1 12.00 usec  
PLW1 26.5459953 W

F2 - Processing parameters  
SI 65536  
SF 600.1800146 MHz  
WDW EM  
SSB 0  
LB 0.30 Hz  
GB 0  
PC 1.00

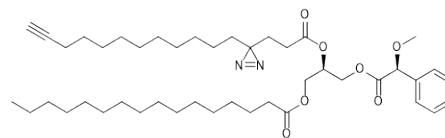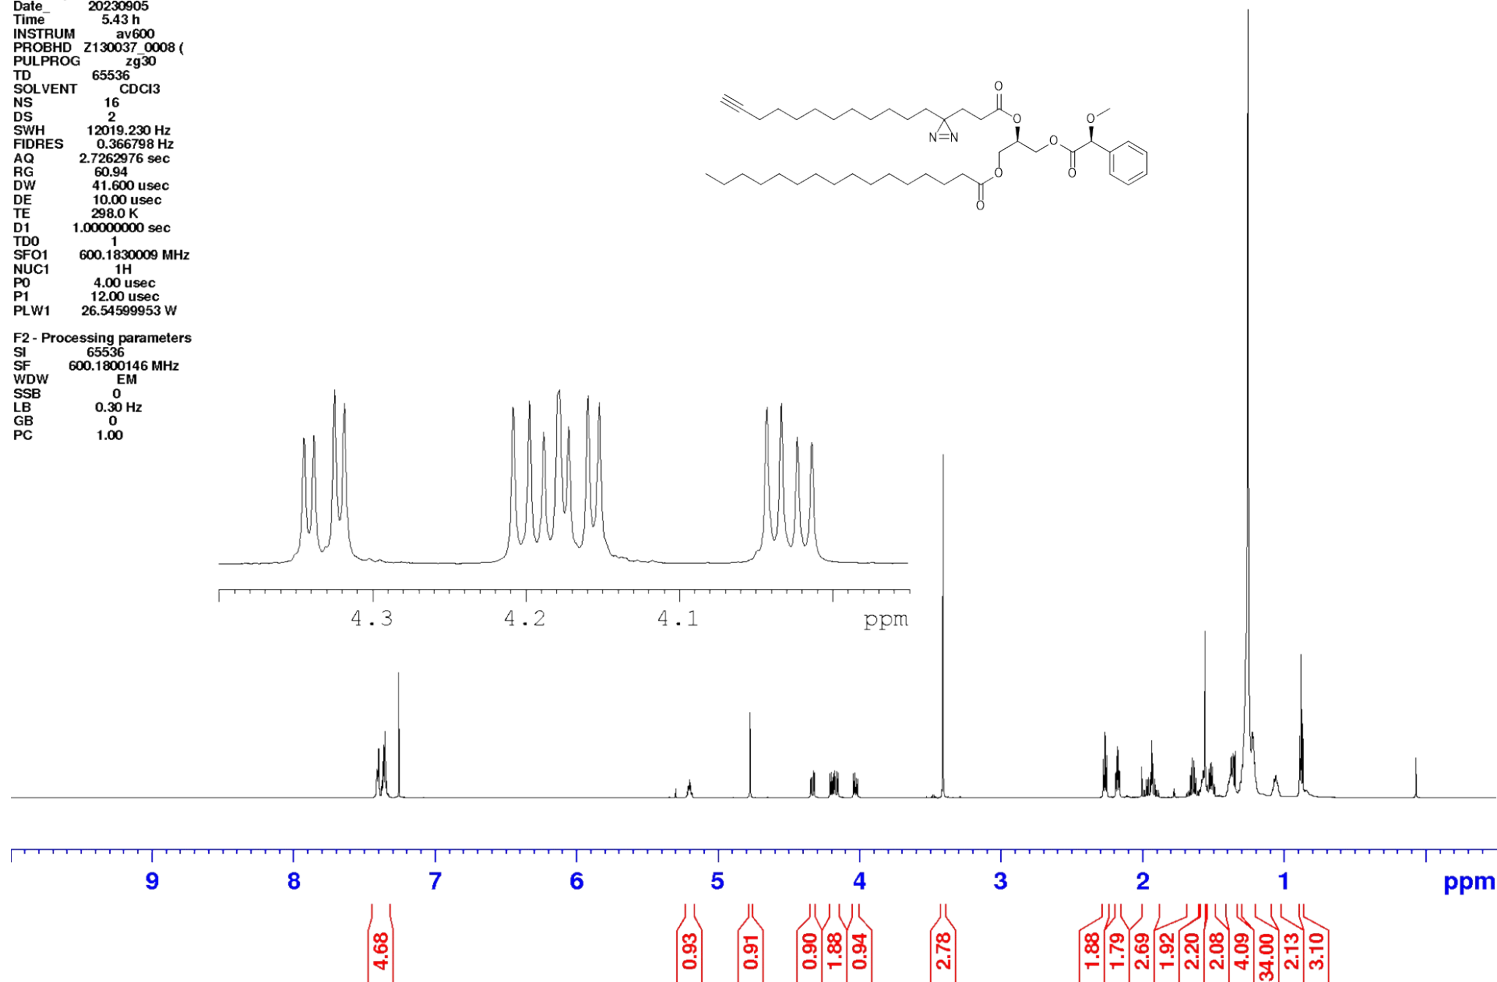

**(R)-2-((3-(3-(dodec-11-yn-1-yl)-3H-diazirin-3-yl)propanoyl)oxy)-3-((S)-2-methoxy-2-phenylacetoxy)propyl palmitate (+)-S25 <sup>13</sup>C NMR**

```

Current Data Parameters
NAME      qb716170509 (R, R)
EXPNO     5
PROCNO    1

F2 - Acquisition Parameters
Date_     20230905
Time      7.22 h
INSTRUM   av600
PROBHD    Z130037_0008 (
PULPROG   zgpg30
TD        65536
SOLVENT   CDCl3
NS        1024
DS        4
SWH       36057.691 Hz
FIDRES    1.100393 Hz
AQ        0.9087659 sec
RG        197.67
DM        13.867 usec
DE        18.00 usec
TE        298.0 K
D1        2.0000000 sec
D11       0.0300000 sec
TD0       1
SFO1      150.9304719 MHz
NUC1      13C
PO        3.33 usec
P1        10.00 usec
PLM1      64.0000000 M
SFO2      600.1824007 MHz
NUC2      1H
CFDPRG[2] waltz16
PCPD2     70.00 usec
PLM2      26.5459953 M
PLM12     0.79013003 M
PLM13     0.39240000 M

F2 - Processing parameters
SI        32768
SF        150.9153606 MHz
WDW       EM
SSB       0
LB        1.00 Hz
GB        0
PC        1.40
    
```

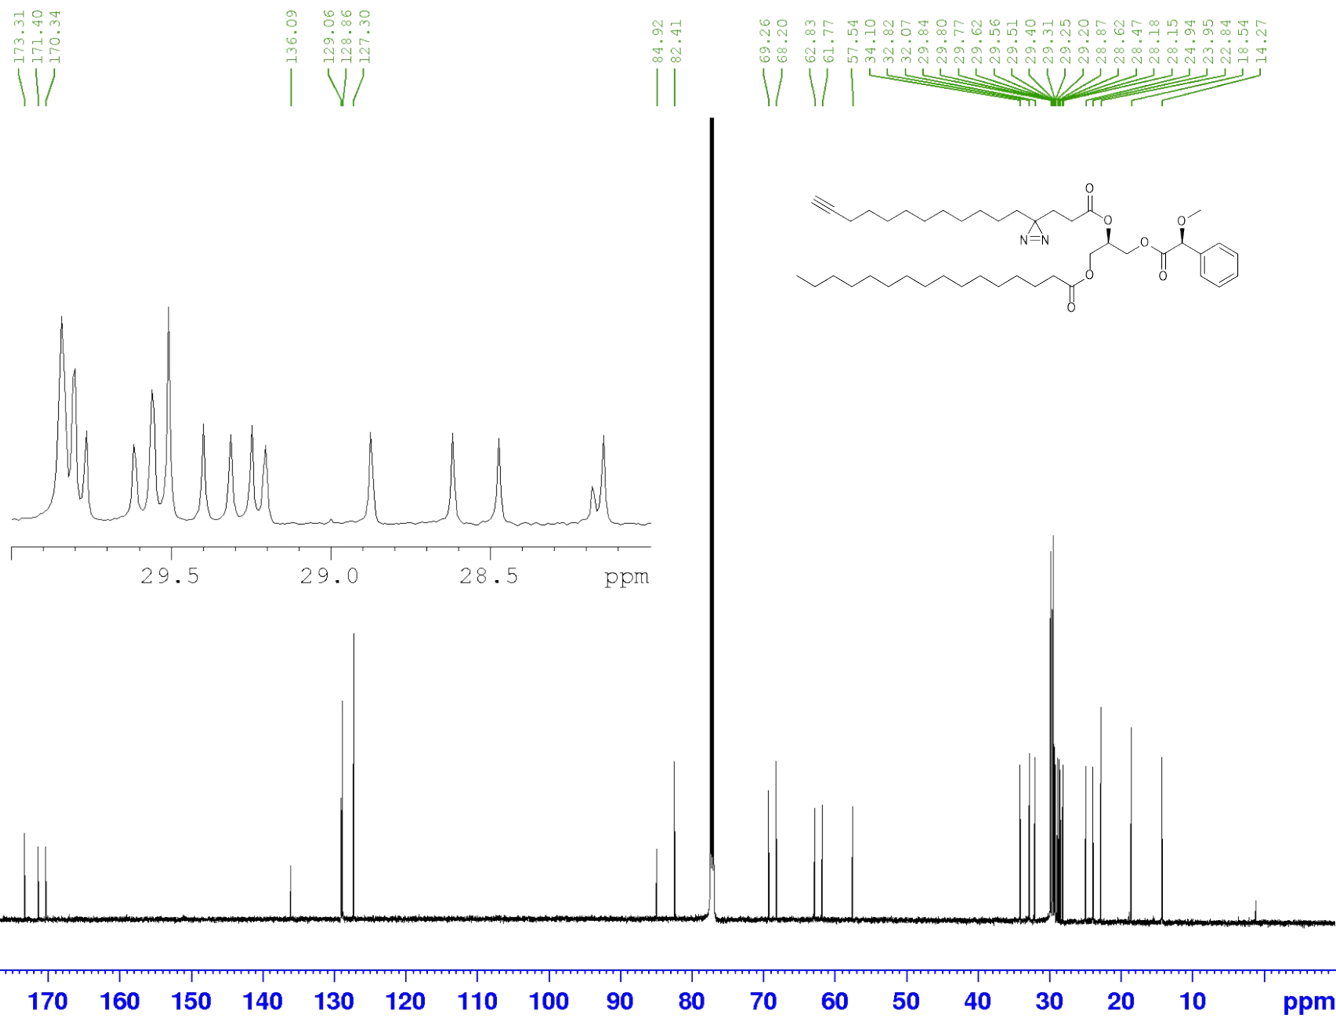

**(R)-2-((3-(3-(dodec-11-yn-1-yl)-3H-diazirin-3-yl)propanoyl)oxy)-3-((S)-2-methoxy-2-phenylacetoxy)propyl palmitate (+)-S25 HRMS**

Expanded Spectrum RT 0.09, NL 1248267, Peak [1], Target Mass 761.5075

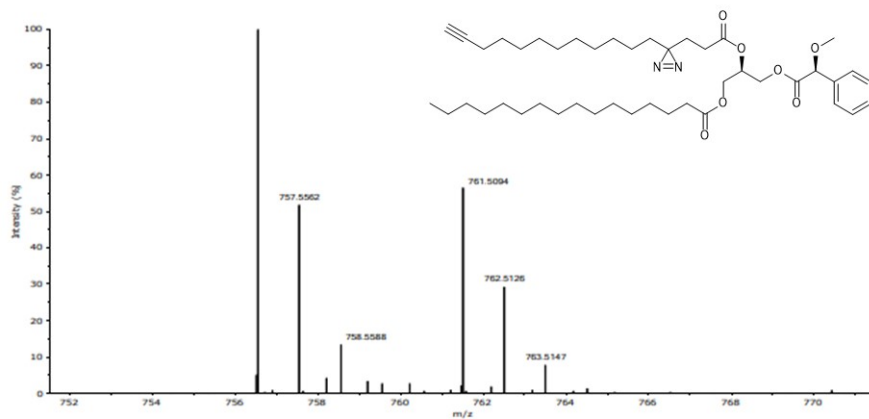

Theoretical Spectrum for C<sub>44</sub>H<sub>70</sub>N<sub>2</sub>O<sub>7</sub>Na, Minimum Abundance 0.01%

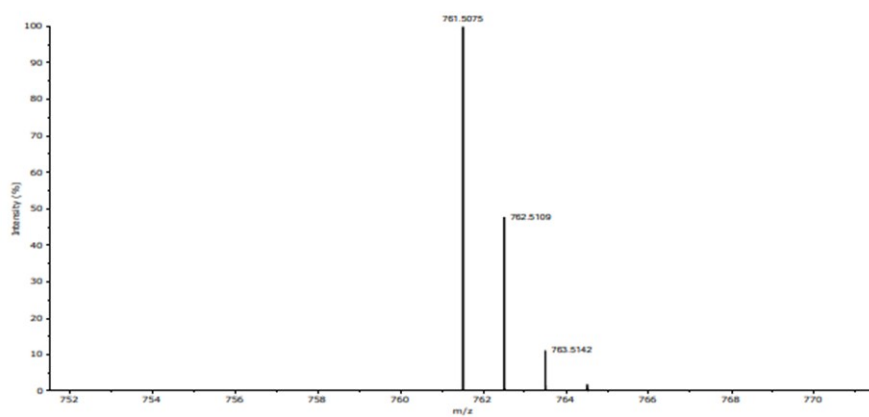

| Measured Mass | Calculated Mass | Error (mDa) | Error (ppm) | Formula [M+Na] <sup>+</sup>                                      | Response |
|---------------|-----------------|-------------|-------------|------------------------------------------------------------------|----------|
| 761.5094      | 761.5075        | 1.87        | 2.46        | C <sub>44</sub> H <sub>70</sub> N <sub>2</sub> O <sub>7</sub> Na | 348746   |

**(R)-2-((3-(3-(dodec-11-yn-1-yl)-3H-diazirin-3-yl)propanoyl)oxy)-3-((R)-2-methoxy-2-phenylacetoxy)propyl palmitate (-)-S26 <sup>1</sup>H NMR**

Current Data Parameters  
NAME gb716180509 (R, S)  
EXPNO 1  
PROCNO 1

F2 - Acquisition Parameters  
Date\_ 20230905  
Time 7.29 h  
INSTRUM av600  
PROBHD Z130037\_0008 (PULPROG zg30  
TD 65536  
SOLVENT CDCl3  
NS 16  
DS 2  
SWH 12019.230 Hz  
FIDRES 0.366798 Hz  
AQ 2.7262976 sec  
RG 60.94  
DW 41.600 usec  
DE 10.00 usec  
TE 298.0 K  
D1 1.00000000 sec  
TD0 1  
SFO1 600.1830009 MHz  
NUC1 1H  
PO 4.00 usec  
P1 12.00 usec  
PLW1 26.54589953 W

F2 - Processing parameters  
SI 65536  
SF 600.1800147 MHz  
WDW EM  
SSB 0  
LB 0.30 Hz  
GB 0  
PC 1.00

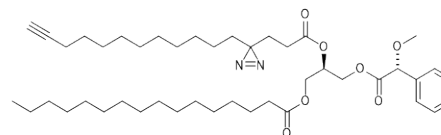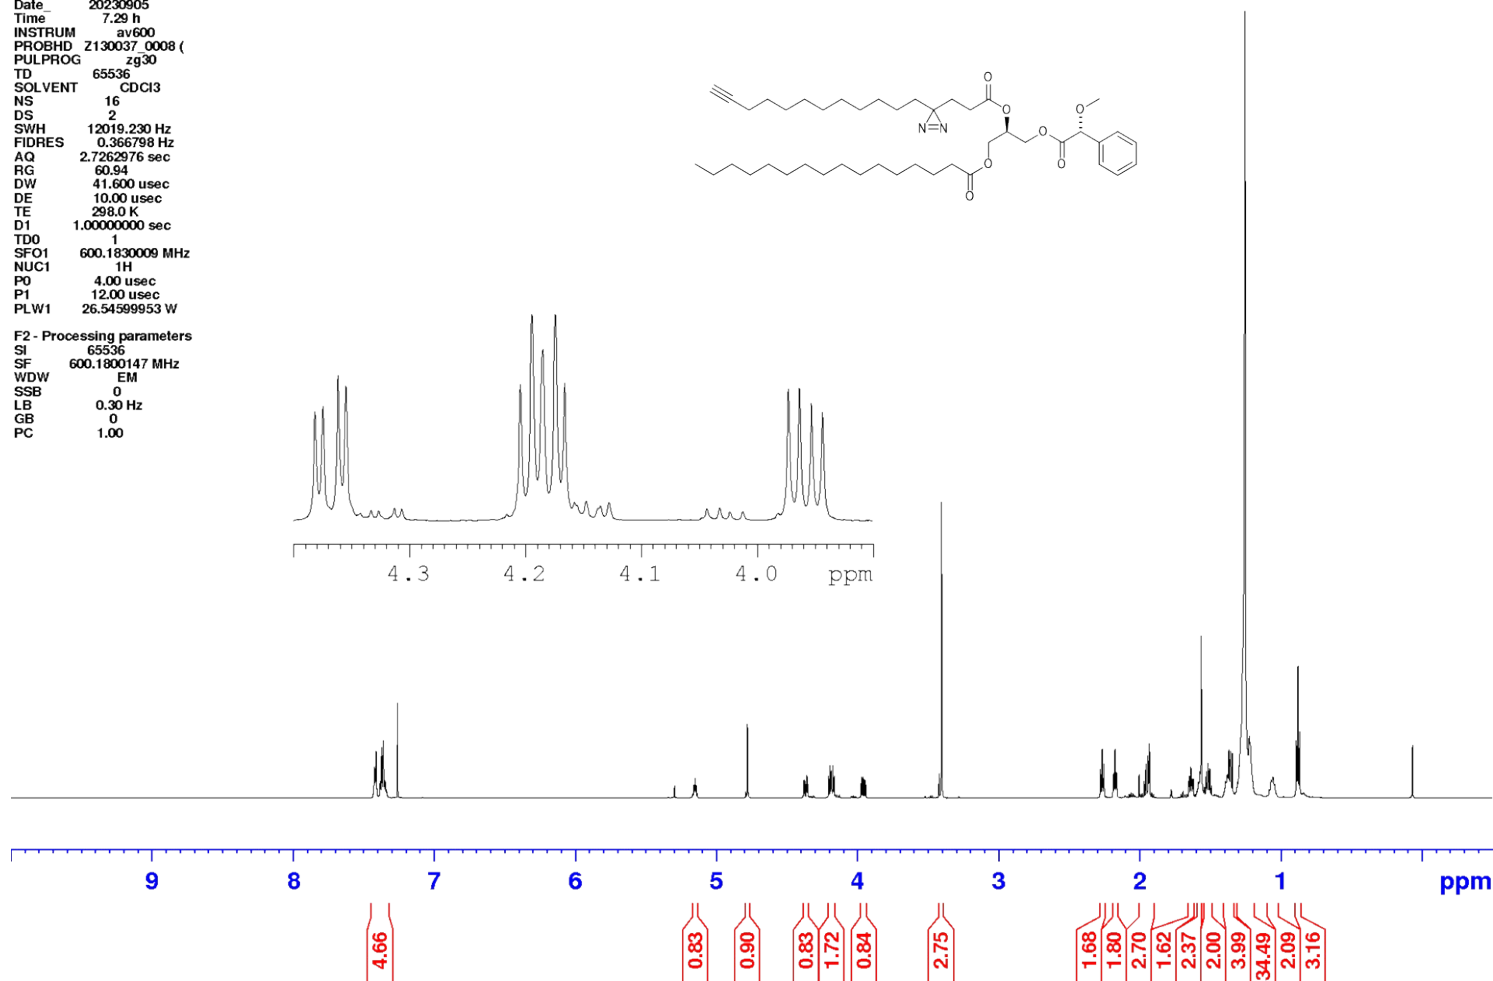

**(R)-2-((3-(3-(dodec-11-yn-1-yl)-3H-diazirin-3-yl)propanoyl)oxy)-3-((R)-2-methoxy-2-phenylacetoxy)propyl palmitate (-)-S26 <sup>13</sup>C NMR**

```

Current Data Parameters
NAME      gb716180509 (R, S)
EXPNO     5
PROCNO    1

F2 - Acquisition Parameters
Date_     20230905
Time      20:25 h
INSTRUM   av600
PROBHD    E130037_0008 (
PULPROG   zgpg30
TD         65536
SOLVENT   CDCl3
NS         1024
DS         4
SWH        36057.691 Hz
FIDRES     1.100393 Hz
AQ         0.9087659 sec
RG         197.67
DM         13.867 usec
DE         18.00 usec
TE         298.0 K
D1         2.0000000 sec
D11        0.0300000 sec
TD0        1
SFO1       150.9304719 MHz
NUC1       13C
PC         3.33 usec
P1         10.00 usec
PLM1       64.0000000 W
SFO2       600.1824007 MHz
NUC2       1H
CPDPRG2    waltz16
PCPD2      70.00 usec
PLM2       26.5459953 W
PLM12      0.78013003 W
PLM13      0.39240000 W

F2 - Processing parameters
SI         32768
SF         150.9153610 MHz
WDW        EM
SSB        0
LB         1.00 Hz
GB         0
PC         1.40
    
```

173.32  
171.36  
170.33

136.05  
129.06  
128.85  
127.30

84.92  
82.44

69.32  
68.119  
62.54  
61.74  
57.52  
34.10  
32.81  
32.07  
29.84  
29.80  
29.76  
29.62  
29.55  
29.51  
29.40  
29.31  
29.24  
29.20  
28.87  
28.62  
28.49  
28.18  
28.13  
24.95  
23.94  
22.83  
18.53  
14.27

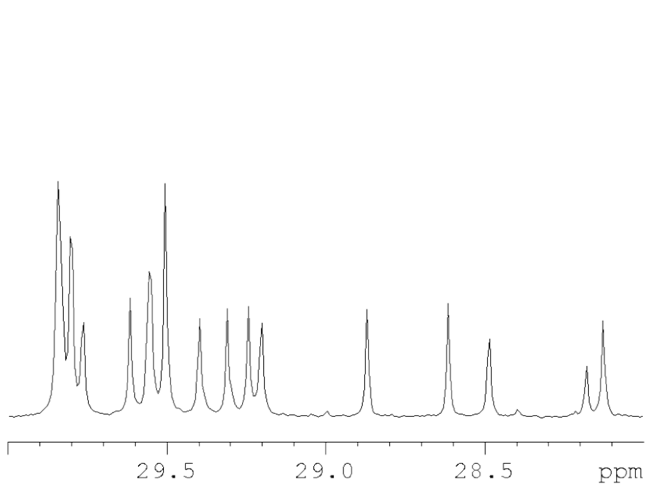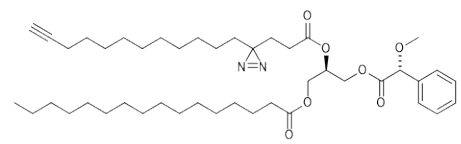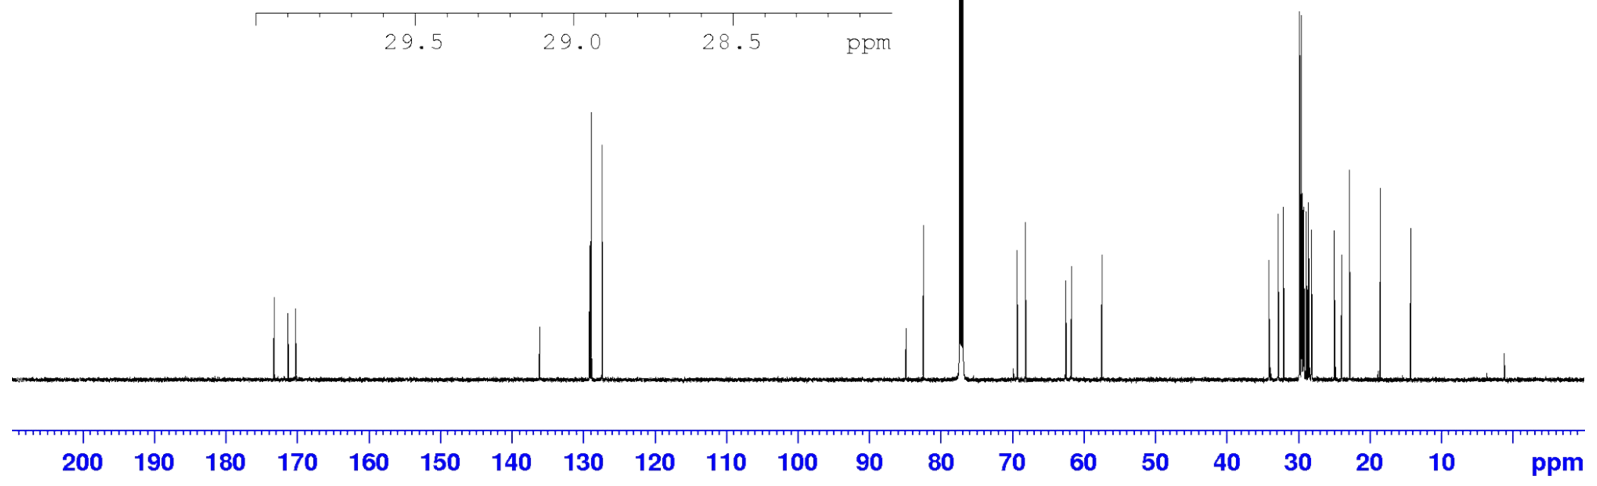

**(R)-2-((3-(3-(dodec-11-yn-1-yl)-3H-diazirin-3-yl)propanoyl)oxy)-3-((R)-2-methoxy-2-phenylacetoxy)propyl palmitate (-)-S26 HRMS**

Expanded Spectrum RT 0.09, NL 1347099, Peak [1], Target Mass 761.5075

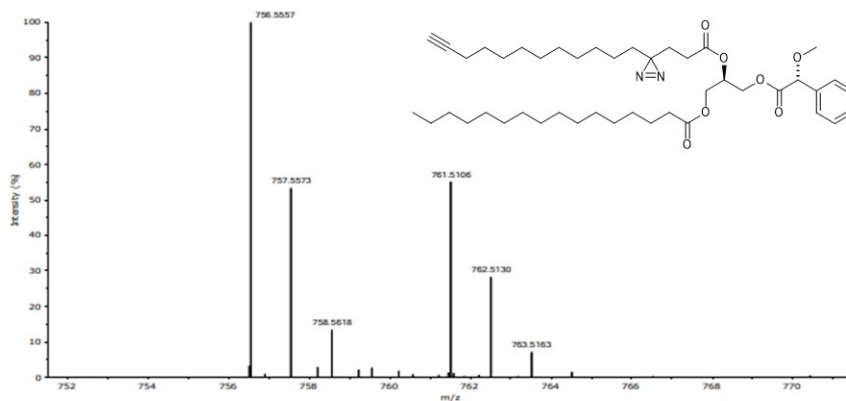

Theoretical Spectrum for C<sub>44</sub>H<sub>70</sub>N<sub>2</sub>O<sub>7</sub>Na, Minimum Abundance 0.01%

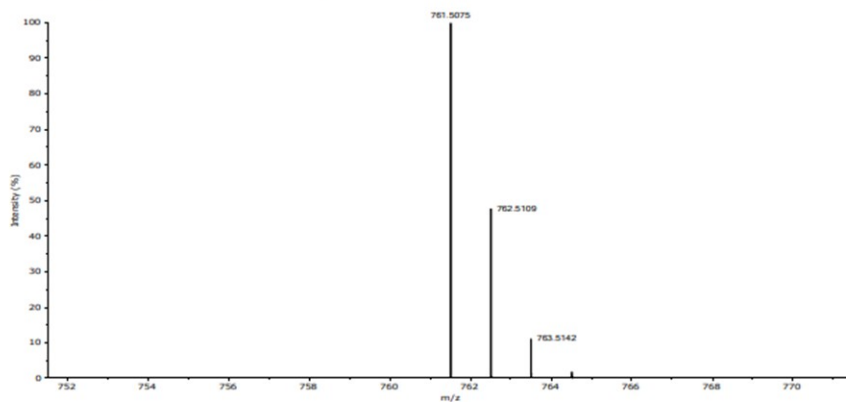

| Measured Mass | Calculated Mass | Error (mDa) | Error (ppm) | Formula [M+Na] <sup>+</sup>                                      | Response |
|---------------|-----------------|-------------|-------------|------------------------------------------------------------------|----------|
| 761.5106      | 761.5075        | 3.07        | 4.03        | C <sub>44</sub> H <sub>70</sub> N <sub>2</sub> O <sub>7</sub> Na | 375493   |

## References

- (1) Seco, J. M.; Quiñoá, E.; Riguera, R. The Assignment of Absolute Configuration by NMR. *Chem. Rev.* **2004**, *104* (1), 17–118. <https://doi.org/10.1021/cr000665j>.
- (2) Mandal, P.; Eswara, K.; Yerkesh, Z.; Kharchenko, V.; Zandarashvili, L.; Szczepski, K.; Bensaddek, D.; Jaremko, Ł.; Black, B. E.; Fischle, W. Molecular Basis of hUHRF1 Allosteric Activation for Synergistic Histone Modification Binding by PI5P. *Sci. Adv.* **2022**, *8* (34), eabl9461. <https://doi.org/10.1126/sciadv.abl9461>.
- (3) MacKinnon, A. L.; Taunton, J. Target Identification by Diazirine Photo-Cross-Linking and Click Chemistry. *Curr. Protoc. Chem. Biol.* **2009**, *1* (1), 55–73. <https://doi.org/10.1002/9780470559277.ch090167>.
- (4) Fulmer, G. R.; Miller, A. J. M.; Sherden, N. H.; Gottlieb, H. E.; Nudelman, A.; Stoltz, B. M.; Bercaw, J. E.; Goldberg, K. I. NMR Chemical Shifts of Trace Impurities: Common Laboratory Solvents, Organics, and Gases in Deuterated Solvents Relevant to the Organometallic Chemist. *Organometallics* **2010**, *29* (9), 2176–2179. <https://doi.org/10.1021/om100106e>.
- (5) M. Joffrin, A.; M. Saunders, A.; Barneda, D.; Flemington, V.; L. Thompson, A.; J. Sanganee, H.; J. Conway, S. Development of Isotope-Enriched Phosphatidylinositol-4- and 5-Phosphate Cellular Mass Spectrometry Probes. *Chem. Sci.* **2021**. <https://doi.org/10.1039/D0SC06219G>.
- (6) Descôteaux, C.; Leblanc, V.; Bélanger, G.; Parent, S.; Asselin, É.; Bérubé, G. Improved Synthesis of Unique Estradiol-Linked Platinum(II) Complexes Showing Potent Cytocidal Activity and Affinity for the Estrogen Receptor Alpha and Beta. *Steroids* **2008**, *73* (11), 1077–1089. <https://doi.org/10.1016/j.steroids.2008.04.009>.
- (7) Schill, G.; Schweickert, N.; Fritz, H.; Vetter, W. Synthese von [2]-Catenanen aus [2]-Rotaxanen. *Chem. Ber.* **1988**, *121* (5), 961–970. <https://doi.org/10.1002/cber.19881210522>.
- (8) Oppolzer, W.; Radinov, R. N.; El-Sayed, E. Catalytic Asymmetric Synthesis of Macrocyclic (E)-Allylic Alcohols from  $\omega$ -Alkynals via Intramolecular 1-Alkenylzinc/Aldehyde Additions. *J. Org. Chem.* **2001**, *66* (14), 4766–4770. <https://doi.org/10.1021/jo000463n>.
- (9) Mori, K. Pheromone Synthesis. Part 253: Synthesis of the Racemates and Enantiomers of Triglycerides of Male *Drosophila* Fruit Flies with Special Emphasis on the Preparation of Enantiomerically Pure 1-Monoglycerides. *Tetrahedron* **2012**, *68* (40), 8441–8449. <https://doi.org/10.1016/j.tet.2012.07.086>.
- (10) Nadler, A.; Reither, G.; Feng, S.; Stein, F.; Reither, S.; Müller, R.; Schultz, C. The Fatty Acid Composition of Diacylglycerols Determines Local Signaling Patterns. *Angew. Chem. Int. Ed.* **2013**, *52* (24), 6330–6334. <https://doi.org/10.1002/anie.201301716>.
- (11) Forget, S. M.; Jee, A.; Smithen, D. A.; Jagdhane, R.; Anjum, S.; Beaton, S. A.; Palmer, D. R. J.; Syvitski, R. T.; Jakeman, D. L. Kinetic Evaluation of Glucose 1-Phosphate Analogues with a Thymidyltransferase Using a Continuous Coupled Enzyme Assay. *Org. Biomol. Chem.* **2014**, *13* (3), 866–875. <https://doi.org/10.1039/C4OB02057J>.
- (12) Laumen, K.; Ghisalba, O. Preparative-Scale Chemo-Enzymatic Synthesis of Optically Pure d-Myo-Inositol-1-Phosphate. *Biosci. Biotechnol. Biochem.* **1994**, *58* (11), 2046–2049. <https://doi.org/10.1271/bbb.58.2046>.
